# Supplementary material for: Spatial, temporal, and demographic patterns in prevalence of smoking tobacco use and attributable disease burden in 204 countries and territories, 1990–2019: a systematic analysis from the Global Burden of Disease Study 2019
Source: PubMed Central journal article supplement (PMC8223261; doi:10.1016/s0140-6736(21)01169-7), 2021-06-19
Supplement: mmc2.pdf [file mmc2.pdf]

# THE LANCET

## Supplementary appendix

This appendix formed part of the original submission and has been peer reviewed. We post it as supplied by the authors.

Supplement to: GBD 2019 Tobacco Collaborators. Spatial, temporal, and demographic patterns in prevalence of smoking tobacco use and attributable disease burden in 204 countries and territories, 1990–2019: a systematic analysis from the Global Burden of Disease Study 2019. *Lancet* 2021; published online May 27. [http://dx.doi.org/10.1016/S0140-6736\(21\)01169-7](http://dx.doi.org/10.1016/S0140-6736(21)01169-7).

# **Supplementary Results**

**Spatial, temporal, and demographic patterns in prevalence of smoking tobacco use and attributable disease burden in 204 countries and territories, 1990-2019: a systematic analysis from the Global Burden of Disease Study 2019**

GBD 2019 Tobacco Collaborators

## Table of Contents

|                                                                                                                                                                                                                                                                                                                                                       |          |
|-------------------------------------------------------------------------------------------------------------------------------------------------------------------------------------------------------------------------------------------------------------------------------------------------------------------------------------------------------|----------|
| <b>Tables and Figures.....</b>                                                                                                                                                                                                                                                                                                                        | <b>3</b> |
| Supplemental Table S1a. Results from dose-response meta-regressions for 36 health outcomes caused by smoking, at doses used as knots in estimation.....                                                                                                                                                                                               | 5        |
| Supplemental Table S1b. Results from dose-response meta-regressions for 36 health outcomes caused by smoking, at standardized doses. ....                                                                                                                                                                                                             | 43       |
| Supplemental Figure S1a. Age-standardized smoking prevalence among males ages 15 and above, 2019. ....                                                                                                                                                                                                                                                | 83       |
| Supplemental Figure S1b. Age-standardized smoking prevalence among females ages 15 and above, 2019. ....                                                                                                                                                                                                                                              | 84       |
| Supplemental Table S2. Number of current smokers (millions), by sex, in 2019, for 204 countries and territories.....                                                                                                                                                                                                                                  | 85       |
| Supplemental Table S3. Relative percent change in number of smokers and age-standardized smoking prevalence, between 1990 and 2019, for 204 countries and territories. ....                                                                                                                                                                           | 94       |
| Supplemental Table S4. Cigarette-equivalents per person aged 15 years and older in 1990 and 2019, for 204 countries and territories. ....                                                                                                                                                                                                             | 103      |
| Supplemental Table S5. All-cause and all-age smoking attributable deaths by location and sex, 2019. Estimates are reported as total number of attributable deaths, percent of deaths attributable to smoking, and smoking attributable death rate (per 100,000). ....                                                                                 | 112      |
| Supplemental Table S6. All-cause and all-age smoking attributable disability-adjusted life-years (DALYs) by location and sex, 2019. Estimates are reported as total number of attributable DALYs, percent of DALYs attributable to smoking, and smoking attributable DALY rate (per 100,000). ....                                                    | 139      |
| Supplemental Table S7. Ratio of smoking attributable years of life lost (YLLs) to years lived with disability (YLDs), by location for 2019.....                                                                                                                                                                                                       | 166      |
| Supplemental Figure S2. Ratio of smoking attributable years of life lost (YLLs) to years lived with disability (YLDs), by location and Socio-demographic Index level, in 1990 and 2019. Size of the point corresponds to the smoking-attributable disability-adjusted life-year rate. Colors correspond to the geographic region of the location..... | 175      |
| Supplemental Table S8. Number of smoking attributable deaths for all causes and the top four causes of death (chronic obstructive pulmonary disease, ischaemic heart disease, stroke, and lung cancer), by region, in 2019. ....                                                                                                                      | 176      |
| Supplemental Figure S3. Global smoking attributable deaths (number, percent, rate per 100,000) by five-year age group for both sexes combined in 2019.....                                                                                                                                                                                            | 178      |
| Supplemental Table S9. Percent change in number and share of all-age all-cause deaths attributable to smoking tobacco use, 1990-2019, by location. ....                                                                                                                                                                                               | 179      |

## Tables and Figures

**Supplemental Table S1a.** Results from dose-response meta-regressions for 36 health outcomes caused by smoking, at doses used as knots in estimation.

**Supplemental Table S1b.** Results from dose-response meta-regressions for 36 health outcomes caused by smoking, at standardized doses.

**Supplemental Figure S1a.** Age-standardized smoking prevalence among males ages 15 and above, 2019.

**Supplemental Figure S1b.** Age-standardized smoking prevalence among females ages 15 and above, 2019.

**Supplemental Table S2.** Number of current smokers (millions), by sex, in 2019, for 204 countries and territories.

**Supplemental Table S3.** Relative percent change in number of smokers and age-standardized smoking prevalence, between 1990 and 2019, for 204 countries and territories.

**Supplemental Table S4.** Cigarette-equivalents per person in 1990 and 2019, for 204 countries and territories.

**Supplemental Table S5.** All-cause and all-age smoking attributable deaths by location and sex, 2019. Estimates are reported as total number of attributable deaths, percent of deaths attributable to smoking, and smoking attributable death rate (per 100,000).

**Supplemental Table S6.** All-cause and all-age smoking attributable disability-adjusted life-years (DALYs) by location and sex, 2019. Estimates are reported as total number of attributable DALYs, percent of DALYs attributable to smoking, and smoking attributable DALY rate (per 100,000).

**Supplemental Table S7.** Ratio of smoking attributable years of life lost (YLLs) to years lived with disability (YLDs), by location for 2019.

**Supplemental Figure S2.** Ratio of smoking attributable years of life lost (YLLs) to years lived with disability (YLDs), by location and Socio-demographic Index level, in 1990 and 2019. Size of the point corresponds to the smoking-attributable disability-adjusted life-year rate. Colors correspond to the geographic region of the location.

**Supplemental Table S8.** Number of smoking attributable deaths for all causes and the top four causes of death (chronic obstructive pulmonary disease, ischaemic heart disease, stroke, and lung cancer), by region, in 2019.

**Supplemental Figure S3.** Global smoking attributable deaths (number, percent, rate per 100,000) by five-year age group for both sexes combined in 2019.

**Supplemental Table S9.** Percent change in number and share of all-age all-cause deaths attributable to smoking tobacco use, 1990-2019, by location.

**Supplemental Table S1a.** Results from dose-response meta-regressions for 36 health outcomes caused by smoking, at doses used as knots in estimation.

| Health Outcome               | Age Group | Sex  | Dose                       | Relative Risk       |
|------------------------------|-----------|------|----------------------------|---------------------|
| Tuberculosis                 | All Ages  | Both | 0 Cigarette-Equivalents    | 1.00<br>(1.00–1.00) |
| Tuberculosis                 | All Ages  | Both | 9 Cigarette-Equivalents    | 2.07<br>(1.60–2.55) |
| Tuberculosis                 | All Ages  | Both | 18 Cigarette-Equivalents   | 2.31<br>(1.81–2.92) |
| Tuberculosis                 | All Ages  | Both | 27 Cigarette-Equivalents   | 3.03<br>(2.31–3.97) |
| Tuberculosis                 | All Ages  | Both | 36 Cigarette-Equivalents   | 4.01<br>(2.49–5.99) |
| Lower respiratory infections | All Ages  | Both | 0 Cigarette-Equivalents    | 1.00<br>(1.00–1.00) |
| Lower respiratory infections | All Ages  | Both | 1.5 Cigarette-Equivalents  | 1.32<br>(1.00–1.79) |
| Lower respiratory infections | All Ages  | Both | 10 Cigarette-Equivalents   | 1.96<br>(1.36–2.73) |
| Lower respiratory infections | All Ages  | Both | 19.5 Cigarette-Equivalents | 2.43<br>(1.74–3.31) |
| Lower respiratory infections | All Ages  | Both | 31.2 Cigarette-Equivalents | 3.16<br>(2.29–4.20) |
| Esophageal cancer            | All Ages  | Both | 0 Pack-Years               | 1.00<br>(1.00–1.00) |
| Esophageal cancer            | All Ages  | Both | 15 Pack-Years              | 3.04<br>(2.32–3.82) |
| Esophageal cancer            | All Ages  | Both | 30 Pack-Years              | 2.78<br>(1.88–3.80) |
| Esophageal cancer            | All Ages  | Both | 45 Pack-Years              | 4.47<br>(3.10–5.83) |
| Esophageal cancer            | All Ages  | Both | 60 Pack-Years              | 5.33<br>(2.86–8.23) |
| Esophageal cancer            | All Ages  | Both | 75 Pack-Years              | 7.33<br>(3.28–12.5) |
| Esophageal cancer            | All Ages  | Both | 90 Pack-Years              | 9.59<br>(4.87–15.6) |
| Stomach cancer               | All Ages  | Both | 0 Pack-Years               | 1.00<br>(1.00–1.00) |
| Stomach cancer               | All Ages  | Both | 12.5 Pack-Years            | 1.43<br>(1.18–1.71) |
| Stomach cancer               | All Ages  | Both | 25 Pack-Years              | 1.61<br>(1.29–1.99) |
| Stomach cancer               | All Ages  | Both | 37.5 Pack-Years            | 1.91<br>(1.47–2.41) |
| Stomach cancer               | All Ages  | Both | 50 Pack-Years              | 2.05<br>(1.56–2.54) |
| Stomach cancer               | All Ages  | Both | 75 Pack-Years              | 2.12<br>(1.55–2.93) |
| Liver cancer                 | All Ages  | Both | 0 Pack-Years               | 1.00<br>(1.00–1.00) |

|                                     |          |        |                 |                     |
|-------------------------------------|----------|--------|-----------------|---------------------|
| Liver cancer                        | All Ages | Both   | 14.6 Pack-Years | 1.51<br>(1.04–2.04) |
| Liver cancer                        | All Ages | Both   | 29.2 Pack-Years | 1.64<br>(1.10–2.26) |
| Liver cancer                        | All Ages | Both   | 43.8 Pack-Years | 1.83<br>(1.22–2.61) |
| Liver cancer                        | All Ages | Both   | 58.3 Pack-Years | 1.79<br>(1.14–2.72) |
| Liver cancer                        | All Ages | Both   | 72.9 Pack-Years | 1.94<br>(1.15–3.01) |
| Larynx cancer                       | All Ages | Both   | 0 Pack-Years    | 1.00<br>(1.00–1.00) |
| Larynx cancer                       | All Ages | Both   | 15 Pack-Years   | 4.59<br>(2.79–6.82) |
| Larynx cancer                       | All Ages | Both   | 30 Pack-Years   | 8.45<br>(5.06–12.9) |
| Larynx cancer                       | All Ages | Both   | 45 Pack-Years   | 16.2<br>(9.23–25.7) |
| Larynx cancer                       | All Ages | Both   | 60 Pack-Years   | 21.9<br>(10.6–36.7) |
| Larynx cancer                       | All Ages | Both   | 75 Pack-Years   | 26.1<br>(9.62–56.9) |
| Tracheal, bronchus, and lung cancer | All Ages | Both   | 0 Pack-Years    | 1.00<br>(1.00–1.00) |
| Tracheal, bronchus, and lung cancer | All Ages | Both   | 5 Pack-Years    | 1.76<br>(1.21–2.45) |
| Tracheal, bronchus, and lung cancer | All Ages | Both   | 14.3 Pack-Years | 4.86<br>(3.92–5.87) |
| Tracheal, bronchus, and lung cancer | All Ages | Both   | 28.6 Pack-Years | 8.90<br>(7.38–10.6) |
| Tracheal, bronchus, and lung cancer | All Ages | Both   | 42.9 Pack-Years | 13.5<br>(10.5–16.8) |
| Tracheal, bronchus, and lung cancer | All Ages | Both   | 57.1 Pack-Years | 14.8<br>(10.6–19.4) |
| Tracheal, bronchus, and lung cancer | All Ages | Both   | 71.4 Pack-Years | 18.6<br>(12.8–25.6) |
| Tracheal, bronchus, and lung cancer | All Ages | Both   | 85.7 Pack-Years | 21.5<br>(13.9–30.4) |
| Breast cancer                       | All Ages | Male   | 0 Pack-Years    | 1.00<br>(1.00–1.00) |
| Breast cancer                       | All Ages | Male   | 12.8 Pack-Years | 1.00<br>(1.00–1.00) |
| Breast cancer                       | All Ages | Male   | 25.5 Pack-Years | 1.00<br>(1.00–1.00) |
| Breast cancer                       | All Ages | Male   | 38.2 Pack-Years | 1.00<br>(1.00–1.00) |
| Breast cancer                       | All Ages | Male   | 63.8 Pack-Years | 1.00<br>(1.00–1.00) |
| Breast cancer                       | All Ages | Female | 0 Pack-Years    | 1.00<br>(1.00–1.00) |
| Breast cancer                       | All Ages | Female | 12.8 Pack-Years | 1.21<br>(1.09–1.32) |
| Breast cancer                       | All Ages | Female | 25.5 Pack-Years | 1.31<br>(1.20–1.43) |

|                            |          |        |                            |                     |
|----------------------------|----------|--------|----------------------------|---------------------|
| Breast cancer              | All Ages | Female | 38.2 Pack-Years            | 1.24<br>(1.09–1.38) |
| Breast cancer              | All Ages | Female | 63.8 Pack-Years            | 1.27<br>(1.08–1.49) |
| Cervical cancer            | All Ages | Both   | 0 Pack-Years               | 1.00<br>(1.00–1.00) |
| Cervical cancer            | All Ages | Both   | 5 Pack-Years               | 1.79<br>(1.10–2.75) |
| Cervical cancer            | All Ages | Both   | 7.4 Pack-Years             | 1.94<br>(1.17–2.98) |
| Cervical cancer            | All Ages | Both   | 14.8 Pack-Years            | 2.25<br>(1.26–4.10) |
| Cervical cancer            | All Ages | Both   | 22.1 Pack-Years            | 3.35<br>(1.72–6.12) |
| Cervical cancer            | All Ages | Both   | 29.5 Pack-Years            | 4.21<br>(1.74–8.53) |
| Prostate cancer            | All Ages | Male   | 0 Cigarette-Equivalents    | 1.00<br>(1.00–1.00) |
| Prostate cancer            | All Ages | Male   | 7.5 Cigarette-Equivalents  | 1.19<br>(1.01–1.38) |
| Prostate cancer            | All Ages | Male   | 15 Cigarette-Equivalents   | 1.17<br>(1.00–1.37) |
| Prostate cancer            | All Ages | Male   | 22.5 Cigarette-Equivalents | 1.17<br>(1.00–1.36) |
| Prostate cancer            | All Ages | Male   | 30 Cigarette-Equivalents   | 1.24<br>(1.01–1.51) |
| Prostate cancer            | All Ages | Male   | 37.5 Cigarette-Equivalents | 1.33<br>(1.00–1.78) |
| Prostate cancer            | All Ages | Female | 0 Cigarette-Equivalents    | 1.00<br>(1.00–1.00) |
| Prostate cancer            | All Ages | Female | 7.5 Cigarette-Equivalents  | 1.00<br>(1.00–1.00) |
| Prostate cancer            | All Ages | Female | 15 Cigarette-Equivalents   | 1.00<br>(1.00–1.00) |
| Prostate cancer            | All Ages | Female | 22.5 Cigarette-Equivalents | 1.00<br>(1.00–1.00) |
| Prostate cancer            | All Ages | Female | 30 Cigarette-Equivalents   | 1.00<br>(1.00–1.00) |
| Prostate cancer            | All Ages | Female | 37.5 Cigarette-Equivalents | 1.00<br>(1.00–1.00) |
| Colon and rectum cancer    | All Ages | Both   | 0 Pack-Years               | 1.00<br>(1.00–1.00) |
| Colon and rectum cancer    | All Ages | Both   | 18.8 Pack-Years            | 1.50<br>(1.14–1.85) |
| Colon and rectum cancer    | All Ages | Both   | 37.5 Pack-Years            | 1.61<br>(1.23–2.06) |
| Colon and rectum cancer    | All Ages | Both   | 56.2 Pack-Years            | 1.58<br>(1.15–2.10) |
| Lip and oral cavity cancer | All Ages | Both   | 0 Pack-Years               | 1.00<br>(1.00–1.00) |
| Lip and oral cavity cancer | All Ages | Both   | 17.7 Pack-Years            | 3.19<br>(2.16–4.36) |
| Lip and oral cavity cancer | All Ages | Both   | 35.4 Pack-Years            | 3.75<br>(2.33–5.44) |



|                            |          |        |                 |                     |
|----------------------------|----------|--------|-----------------|---------------------|
| Lip and oral cavity cancer | All Ages | Both   | 53.1 Pack-Years | 4.02<br>(2.38–6.00) |
| Lip and oral cavity cancer | All Ages | Both   | 70.8 Pack-Years | 5.52<br>(2.57–9.80) |
| Lip and oral cavity cancer | All Ages | Both   | 88.5 Pack-Years | 7.27<br>(2.60–14.7) |
| Nasopharynx cancer         | All Ages | Both   | 0 Pack-Years    | 1.00<br>(1.00–1.00) |
| Nasopharynx cancer         | All Ages | Both   | 10.7 Pack-Years | 1.88<br>(1.34–2.52) |
| Nasopharynx cancer         | All Ages | Both   | 21.4 Pack-Years | 1.99<br>(1.32–2.87) |
| Nasopharynx cancer         | All Ages | Both   | 32.1 Pack-Years | 2.30<br>(1.45–3.32) |
| Nasopharynx cancer         | All Ages | Both   | 42.9 Pack-Years | 2.66<br>(1.65–4.01) |
| Nasopharynx cancer         | All Ages | Both   | 53.6 Pack-Years | 3.38<br>(2.01–5.04) |
| Nasopharynx cancer         | All Ages | Both   | 64.3 Pack-Years | 4.47<br>(2.64–6.83) |
| Other pharynx cancer       | All Ages | Both   | 0 Pack-Years    | 1.00<br>(1.00–1.00) |
| Other pharynx cancer       | All Ages | Both   | 17.7 Pack-Years | 4.79<br>(3.27–6.50) |
| Other pharynx cancer       | All Ages | Both   | 35.4 Pack-Years | 5.26<br>(3.54–7.38) |
| Other pharynx cancer       | All Ages | Both   | 53.1 Pack-Years | 6.59<br>(4.41–8.89) |
| Other pharynx cancer       | All Ages | Both   | 70.8 Pack-Years | 7.21<br>(3.97–11.6) |
| Other pharynx cancer       | All Ages | Both   | 88.5 Pack-Years | 11.1<br>(5.54–18.6) |
| Pancreatic cancer          | All Ages | Male   | 0 Pack-Years    | 1.00<br>(1.00–1.00) |
| Pancreatic cancer          | All Ages | Male   | 15.8 Pack-Years | 1.65<br>(1.33–1.98) |
| Pancreatic cancer          | All Ages | Male   | 31.5 Pack-Years | 1.80<br>(1.45–2.18) |
| Pancreatic cancer          | All Ages | Male   | 47.3 Pack-Years | 2.17<br>(1.75–2.61) |
| Pancreatic cancer          | All Ages | Male   | 63 Pack-Years   | 2.43<br>(1.79–3.21) |
| Pancreatic cancer          | All Ages | Female | 0 Pack-Years    | 1.00<br>(1.00–1.00) |
| Pancreatic cancer          | All Ages | Female | 15.8 Pack-Years | 2.36<br>(1.90–2.85) |
| Pancreatic cancer          | All Ages | Female | 31.5 Pack-Years | 2.75<br>(2.10–3.46) |
| Pancreatic cancer          | All Ages | Female | 47.3 Pack-Years | 3.28<br>(2.36–4.34) |
| Pancreatic cancer          | All Ages | Female | 63 Pack-Years   | 3.84<br>(2.06–6.06) |
| Kidney cancer              | All Ages | Both   | 0 Pack-Years    | 1.00<br>(1.00–1.00) |

|                        |          |        |                            |                     |
|------------------------|----------|--------|----------------------------|---------------------|
| Kidney cancer          | All Ages | Both   | 12.3 Pack-Years            | 1.37<br>(1.05–1.75) |
| Kidney cancer          | All Ages | Both   | 24.6 Pack-Years            | 1.73<br>(1.34–2.16) |
| Kidney cancer          | All Ages | Both   | 36.9 Pack-Years            | 1.76<br>(1.30–2.31) |
| Kidney cancer          | All Ages | Both   | 49.2 Pack-Years            | 1.89<br>(1.43–2.44) |
| Kidney cancer          | All Ages | Both   | 61.5 Pack-Years            | 2.01<br>(1.25–3.03) |
| Bladder cancer         | All Ages | Both   | 0 Pack-Years               | 1.00<br>(1.00–1.00) |
| Bladder cancer         | All Ages | Both   | 15 Pack-Years              | 2.80<br>(1.69–4.16) |
| Bladder cancer         | All Ages | Both   | 30 Pack-Years              | 3.33<br>(2.09–5.00) |
| Bladder cancer         | All Ages | Both   | 45 Pack-Years              | 4.24<br>(2.45–6.53) |
| Bladder cancer         | All Ages | Both   | 60 Pack-Years              | 4.55<br>(2.54–7.64) |
| Leukemia               | All Ages | Both   | 0 Pack-Years               | 1.00<br>(1.00–1.00) |
| Leukemia               | All Ages | Both   | 12.4 Pack-Years            | 2.01<br>(1.00–3.61) |
| Leukemia               | All Ages | Both   | 24.8 Pack-Years            | 2.25<br>(1.07–3.96) |
| Leukemia               | All Ages | Both   | 37.1 Pack-Years            | 2.64<br>(1.48–4.39) |
| Ischemic heart disease | 30 to 34 | Male   | 0 Cigarette-Equivalents    | 1.00<br>(1.00–1.00) |
| Ischemic heart disease | 30 to 34 | Male   | 11.2 Cigarette-Equivalents | 2.97<br>(2.57–3.37) |
| Ischemic heart disease | 30 to 34 | Male   | 22.5 Cigarette-Equivalents | 3.29<br>(2.80–3.85) |
| Ischemic heart disease | 30 to 34 | Male   | 33.8 Cigarette-Equivalents | 4.28<br>(3.41–5.10) |
| Ischemic heart disease | 30 to 34 | Male   | 45 Cigarette-Equivalents   | 5.45<br>(3.72–7.54) |
| Ischemic heart disease | 30 to 34 | Male   | 56.2 Cigarette-Equivalents | 5.57<br>(3.77–7.90) |
| Ischemic heart disease | 30 to 34 | Female | 0 Cigarette-Equivalents    | 1.00<br>(1.00–1.00) |
| Ischemic heart disease | 30 to 34 | Female | 11.2 Cigarette-Equivalents | 3.78<br>(2.96–4.81) |
| Ischemic heart disease | 30 to 34 | Female | 22.5 Cigarette-Equivalents | 6.68<br>(5.11–8.41) |
| Ischemic heart disease | 30 to 34 | Female | 33.8 Cigarette-Equivalents | 9.74<br>(7.03–12.9) |
| Ischemic heart disease | 30 to 34 | Female | 45 Cigarette-Equivalents   | 11.8<br>(7.22–17.6) |
| Ischemic heart disease | 30 to 34 | Female | 56.2 Cigarette-Equivalents | 13.6<br>(7.46–22.8) |
| Ischemic heart disease | 35 to 39 | Male   | 0 Cigarette-Equivalents    | 1.00<br>(1.00–1.00) |

|                        |          |        |                            |                     |
|------------------------|----------|--------|----------------------------|---------------------|
| Ischemic heart disease | 35 to 39 | Male   | 11.2 Cigarette-Equivalents | 2.97<br>(2.57–3.37) |
| Ischemic heart disease | 35 to 39 | Male   | 22.5 Cigarette-Equivalents | 3.29<br>(2.80–3.85) |
| Ischemic heart disease | 35 to 39 | Male   | 33.8 Cigarette-Equivalents | 4.28<br>(3.41–5.10) |
| Ischemic heart disease | 35 to 39 | Male   | 45 Cigarette-Equivalents   | 5.45<br>(3.72–7.54) |
| Ischemic heart disease | 35 to 39 | Male   | 56.2 Cigarette-Equivalents | 5.57<br>(3.77–7.90) |
| Ischemic heart disease | 35 to 39 | Female | 0 Cigarette-Equivalents    | 1.00<br>(1.00–1.00) |
| Ischemic heart disease | 35 to 39 | Female | 11.2 Cigarette-Equivalents | 3.78<br>(2.96–4.81) |
| Ischemic heart disease | 35 to 39 | Female | 22.5 Cigarette-Equivalents | 6.68<br>(5.11–8.41) |
| Ischemic heart disease | 35 to 39 | Female | 33.8 Cigarette-Equivalents | 9.74<br>(7.03–12.9) |
| Ischemic heart disease | 35 to 39 | Female | 45 Cigarette-Equivalents   | 11.8<br>(7.22–17.6) |
| Ischemic heart disease | 35 to 39 | Female | 56.2 Cigarette-Equivalents | 13.6<br>(7.46–22.8) |
| Ischemic heart disease | 40 to 44 | Male   | 0 Cigarette-Equivalents    | 1.00<br>(1.00–1.00) |
| Ischemic heart disease | 40 to 44 | Male   | 11.2 Cigarette-Equivalents | 2.97<br>(2.57–3.37) |
| Ischemic heart disease | 40 to 44 | Male   | 22.5 Cigarette-Equivalents | 3.29<br>(2.80–3.85) |
| Ischemic heart disease | 40 to 44 | Male   | 33.8 Cigarette-Equivalents | 4.28<br>(3.41–5.10) |
| Ischemic heart disease | 40 to 44 | Male   | 45 Cigarette-Equivalents   | 5.45<br>(3.72–7.54) |
| Ischemic heart disease | 40 to 44 | Male   | 56.2 Cigarette-Equivalents | 5.57<br>(3.77–7.90) |
| Ischemic heart disease | 40 to 44 | Female | 0 Cigarette-Equivalents    | 1.00<br>(1.00–1.00) |
| Ischemic heart disease | 40 to 44 | Female | 11.2 Cigarette-Equivalents | 3.78<br>(2.96–4.81) |
| Ischemic heart disease | 40 to 44 | Female | 22.5 Cigarette-Equivalents | 6.68<br>(5.11–8.41) |
| Ischemic heart disease | 40 to 44 | Female | 33.8 Cigarette-Equivalents | 9.74<br>(7.03–12.9) |
| Ischemic heart disease | 40 to 44 | Female | 45 Cigarette-Equivalents   | 11.8<br>(7.22–17.6) |
| Ischemic heart disease | 40 to 44 | Female | 56.2 Cigarette-Equivalents | 13.6<br>(7.46–22.8) |
| Ischemic heart disease | 45 to 49 | Male   | 0 Cigarette-Equivalents    | 1.00<br>(1.00–1.00) |
| Ischemic heart disease | 45 to 49 | Male   | 11.2 Cigarette-Equivalents | 2.53<br>(2.23–2.81) |
| Ischemic heart disease | 45 to 49 | Male   | 22.5 Cigarette-Equivalents | 2.67<br>(2.33–3.06) |
| Ischemic heart disease | 45 to 49 | Male   | 33.8 Cigarette-Equivalents | 3.39<br>(2.79–4.01) |

|                        |          |        |                            |                     |
|------------------------|----------|--------|----------------------------|---------------------|
| Ischemic heart disease | 45 to 49 | Male   | 45 Cigarette-Equivalents   | 4.14<br>(2.95–5.55) |
| Ischemic heart disease | 45 to 49 | Male   | 56.2 Cigarette-Equivalents | 4.18<br>(2.88–5.61) |
| Ischemic heart disease | 45 to 49 | Female | 0 Cigarette-Equivalents    | 1.00<br>(1.00–1.00) |
| Ischemic heart disease | 45 to 49 | Female | 11.2 Cigarette-Equivalents | 3.18<br>(2.59–3.82) |
| Ischemic heart disease | 45 to 49 | Female | 22.5 Cigarette-Equivalents | 4.92<br>(3.92–5.93) |
| Ischemic heart disease | 45 to 49 | Female | 33.8 Cigarette-Equivalents | 6.80<br>(5.18–8.76) |
| Ischemic heart disease | 45 to 49 | Female | 45 Cigarette-Equivalents   | 7.73<br>(4.89–11.4) |
| Ischemic heart disease | 45 to 49 | Female | 56.2 Cigarette-Equivalents | 8.81<br>(4.96–14.0) |
| Ischemic heart disease | 50 to 54 | Male   | 0 Cigarette-Equivalents    | 1.00<br>(1.00–1.00) |
| Ischemic heart disease | 50 to 54 | Male   | 11.2 Cigarette-Equivalents | 2.53<br>(2.23–2.81) |
| Ischemic heart disease | 50 to 54 | Male   | 22.5 Cigarette-Equivalents | 2.67<br>(2.33–3.06) |
| Ischemic heart disease | 50 to 54 | Male   | 33.8 Cigarette-Equivalents | 3.39<br>(2.79–4.01) |
| Ischemic heart disease | 50 to 54 | Male   | 45 Cigarette-Equivalents   | 4.14<br>(2.95–5.55) |
| Ischemic heart disease | 50 to 54 | Male   | 56.2 Cigarette-Equivalents | 4.18<br>(2.88–5.61) |
| Ischemic heart disease | 50 to 54 | Female | 0 Cigarette-Equivalents    | 1.00<br>(1.00–1.00) |
| Ischemic heart disease | 50 to 54 | Female | 11.2 Cigarette-Equivalents | 3.18<br>(2.59–3.82) |
| Ischemic heart disease | 50 to 54 | Female | 22.5 Cigarette-Equivalents | 4.92<br>(3.92–5.93) |
| Ischemic heart disease | 50 to 54 | Female | 33.8 Cigarette-Equivalents | 6.80<br>(5.18–8.76) |
| Ischemic heart disease | 50 to 54 | Female | 45 Cigarette-Equivalents   | 7.73<br>(4.89–11.4) |
| Ischemic heart disease | 50 to 54 | Female | 56.2 Cigarette-Equivalents | 8.81<br>(4.96–14.0) |
| Ischemic heart disease | 55 to 59 | Male   | 0 Cigarette-Equivalents    | 1.00<br>(1.00–1.00) |
| Ischemic heart disease | 55 to 59 | Male   | 11.2 Cigarette-Equivalents | 2.13<br>(1.91–2.35) |
| Ischemic heart disease | 55 to 59 | Male   | 22.5 Cigarette-Equivalents | 2.19<br>(1.94–2.43) |
| Ischemic heart disease | 55 to 59 | Male   | 33.8 Cigarette-Equivalents | 2.63<br>(2.26–3.04) |
| Ischemic heart disease | 55 to 59 | Male   | 45 Cigarette-Equivalents   | 3.08<br>(2.30–3.93) |
| Ischemic heart disease | 55 to 59 | Male   | 56.2 Cigarette-Equivalents | 3.02<br>(2.22–3.96) |
| Ischemic heart disease | 55 to 59 | Female | 0 Cigarette-Equivalents    | 1.00<br>(1.00–1.00) |

|                        |          |        |                            |                     |
|------------------------|----------|--------|----------------------------|---------------------|
| Ischemic heart disease | 55 to 59 | Female | 11.2 Cigarette-Equivalents | 2.61<br>(2.20–3.03) |
| Ischemic heart disease | 55 to 59 | Female | 22.5 Cigarette-Equivalents | 3.57<br>(3.01–4.16) |
| Ischemic heart disease | 55 to 59 | Female | 33.8 Cigarette-Equivalents | 4.68<br>(3.71–5.73) |
| Ischemic heart disease | 55 to 59 | Female | 45 Cigarette-Equivalents   | 5.10<br>(3.52–7.02) |
| Ischemic heart disease | 55 to 59 | Female | 56.2 Cigarette-Equivalents | 5.61<br>(3.44–8.34) |
| Ischemic heart disease | 60 to 64 | Male   | 0 Cigarette-Equivalents    | 1.00<br>(1.00–1.00) |
| Ischemic heart disease | 60 to 64 | Male   | 11.2 Cigarette-Equivalents | 2.13<br>(1.91–2.35) |
| Ischemic heart disease | 60 to 64 | Male   | 22.5 Cigarette-Equivalents | 2.19<br>(1.94–2.43) |
| Ischemic heart disease | 60 to 64 | Male   | 33.8 Cigarette-Equivalents | 2.63<br>(2.26–3.04) |
| Ischemic heart disease | 60 to 64 | Male   | 45 Cigarette-Equivalents   | 3.08<br>(2.30–3.93) |
| Ischemic heart disease | 60 to 64 | Male   | 56.2 Cigarette-Equivalents | 3.02<br>(2.22–3.96) |
| Ischemic heart disease | 60 to 64 | Female | 0 Cigarette-Equivalents    | 1.00<br>(1.00–1.00) |
| Ischemic heart disease | 60 to 64 | Female | 11.2 Cigarette-Equivalents | 2.61<br>(2.20–3.03) |
| Ischemic heart disease | 60 to 64 | Female | 22.5 Cigarette-Equivalents | 3.57<br>(3.01–4.16) |
| Ischemic heart disease | 60 to 64 | Female | 33.8 Cigarette-Equivalents | 4.68<br>(3.71–5.73) |
| Ischemic heart disease | 60 to 64 | Female | 45 Cigarette-Equivalents   | 5.10<br>(3.52–7.02) |
| Ischemic heart disease | 60 to 64 | Female | 56.2 Cigarette-Equivalents | 5.61<br>(3.44–8.34) |
| Ischemic heart disease | 65 to 69 | Male   | 0 Cigarette-Equivalents    | 1.00<br>(1.00–1.00) |
| Ischemic heart disease | 65 to 69 | Male   | 11.2 Cigarette-Equivalents | 1.77<br>(1.64–1.91) |
| Ischemic heart disease | 65 to 69 | Male   | 22.5 Cigarette-Equivalents | 1.78<br>(1.63–1.96) |
| Ischemic heart disease | 65 to 69 | Male   | 33.8 Cigarette-Equivalents | 2.05<br>(1.82–2.30) |
| Ischemic heart disease | 65 to 69 | Male   | 45 Cigarette-Equivalents   | 2.33<br>(1.75–2.93) |
| Ischemic heart disease | 65 to 69 | Male   | 56.2 Cigarette-Equivalents | 2.23<br>(1.65–2.85) |
| Ischemic heart disease | 65 to 69 | Female | 0 Cigarette-Equivalents    | 1.00<br>(1.00–1.00) |
| Ischemic heart disease | 65 to 69 | Female | 11.2 Cigarette-Equivalents | 2.13<br>(1.91–2.37) |
| Ischemic heart disease | 65 to 69 | Female | 22.5 Cigarette-Equivalents | 2.57<br>(2.26–2.88) |
| Ischemic heart disease | 65 to 69 | Female | 33.8 Cigarette-Equivalents | 3.25<br>(2.74–3.79) |

|                        |          |        |                            |                     |
|------------------------|----------|--------|----------------------------|---------------------|
| Ischemic heart disease | 65 to 69 | Female | 45 Cigarette-Equivalents   | 3.41<br>(2.46–4.47) |
| Ischemic heart disease | 65 to 69 | Female | 56.2 Cigarette-Equivalents | 3.69<br>(2.60–5.04) |
| Ischemic heart disease | 70 to 74 | Male   | 0 Cigarette-Equivalents    | 1.00<br>(1.00–1.00) |
| Ischemic heart disease | 70 to 74 | Male   | 11.2 Cigarette-Equivalents | 1.77<br>(1.64–1.91) |
| Ischemic heart disease | 70 to 74 | Male   | 22.5 Cigarette-Equivalents | 1.78<br>(1.63–1.96) |
| Ischemic heart disease | 70 to 74 | Male   | 33.8 Cigarette-Equivalents | 2.05<br>(1.82–2.30) |
| Ischemic heart disease | 70 to 74 | Male   | 45 Cigarette-Equivalents   | 2.33<br>(1.75–2.93) |
| Ischemic heart disease | 70 to 74 | Male   | 56.2 Cigarette-Equivalents | 2.23<br>(1.65–2.85) |
| Ischemic heart disease | 70 to 74 | Female | 0 Cigarette-Equivalents    | 1.00<br>(1.00–1.00) |
| Ischemic heart disease | 70 to 74 | Female | 11.2 Cigarette-Equivalents | 2.13<br>(1.91–2.37) |
| Ischemic heart disease | 70 to 74 | Female | 22.5 Cigarette-Equivalents | 2.57<br>(2.26–2.88) |
| Ischemic heart disease | 70 to 74 | Female | 33.8 Cigarette-Equivalents | 3.25<br>(2.74–3.79) |
| Ischemic heart disease | 70 to 74 | Female | 45 Cigarette-Equivalents   | 3.41<br>(2.46–4.47) |
| Ischemic heart disease | 70 to 74 | Female | 56.2 Cigarette-Equivalents | 3.69<br>(2.60–5.04) |
| Ischemic heart disease | 75 to 79 | Male   | 0 Cigarette-Equivalents    | 1.00<br>(1.00–1.00) |
| Ischemic heart disease | 75 to 79 | Male   | 11.2 Cigarette-Equivalents | 1.46<br>(1.37–1.56) |
| Ischemic heart disease | 75 to 79 | Male   | 22.5 Cigarette-Equivalents | 1.46<br>(1.37–1.56) |
| Ischemic heart disease | 75 to 79 | Male   | 33.8 Cigarette-Equivalents | 1.60<br>(1.46–1.73) |
| Ischemic heart disease | 75 to 79 | Male   | 45 Cigarette-Equivalents   | 1.74<br>(1.39–2.10) |
| Ischemic heart disease | 75 to 79 | Male   | 56.2 Cigarette-Equivalents | 1.65<br>(1.29–2.02) |
| Ischemic heart disease | 75 to 79 | Female | 0 Cigarette-Equivalents    | 1.00<br>(1.00–1.00) |
| Ischemic heart disease | 75 to 79 | Female | 11.2 Cigarette-Equivalents | 1.68<br>(1.56–1.79) |
| Ischemic heart disease | 75 to 79 | Female | 22.5 Cigarette-Equivalents | 1.85<br>(1.71–2.00) |
| Ischemic heart disease | 75 to 79 | Female | 33.8 Cigarette-Equivalents | 2.18<br>(1.94–2.43) |
| Ischemic heart disease | 75 to 79 | Female | 45 Cigarette-Equivalents   | 2.24<br>(1.75–2.79) |
| Ischemic heart disease | 75 to 79 | Female | 56.2 Cigarette-Equivalents | 2.41<br>(1.79–3.04) |
| Ischemic heart disease | 80 to 84 | Male   | 0 Cigarette-Equivalents    | 1.00<br>(1.00–1.00) |

|                        |          |        |                            |                     |
|------------------------|----------|--------|----------------------------|---------------------|
| Ischemic heart disease | 80 to 84 | Male   | 11.2 Cigarette-Equivalents | 1.46<br>(1.37–1.56) |
| Ischemic heart disease | 80 to 84 | Male   | 22.5 Cigarette-Equivalents | 1.46<br>(1.37–1.56) |
| Ischemic heart disease | 80 to 84 | Male   | 33.8 Cigarette-Equivalents | 1.60<br>(1.46–1.73) |
| Ischemic heart disease | 80 to 84 | Male   | 45 Cigarette-Equivalents   | 1.74<br>(1.39–2.10) |
| Ischemic heart disease | 80 to 84 | Male   | 56.2 Cigarette-Equivalents | 1.65<br>(1.29–2.02) |
| Ischemic heart disease | 80 to 84 | Female | 0 Cigarette-Equivalents    | 1.00<br>(1.00–1.00) |
| Ischemic heart disease | 80 to 84 | Female | 11.2 Cigarette-Equivalents | 1.68<br>(1.56–1.79) |
| Ischemic heart disease | 80 to 84 | Female | 22.5 Cigarette-Equivalents | 1.85<br>(1.71–2.00) |
| Ischemic heart disease | 80 to 84 | Female | 33.8 Cigarette-Equivalents | 2.18<br>(1.94–2.43) |
| Ischemic heart disease | 80 to 84 | Female | 45 Cigarette-Equivalents   | 2.24<br>(1.75–2.79) |
| Ischemic heart disease | 80 to 84 | Female | 56.2 Cigarette-Equivalents | 2.41<br>(1.79–3.04) |
| Ischemic heart disease | 85 to 89 | Male   | 0 Cigarette-Equivalents    | 1.00<br>(1.00–1.00) |
| Ischemic heart disease | 85 to 89 | Male   | 11.2 Cigarette-Equivalents | 1.19<br>(1.13–1.25) |
| Ischemic heart disease | 85 to 89 | Male   | 22.5 Cigarette-Equivalents | 1.19<br>(1.15–1.23) |
| Ischemic heart disease | 85 to 89 | Male   | 33.8 Cigarette-Equivalents | 1.24<br>(1.17–1.31) |
| Ischemic heart disease | 85 to 89 | Male   | 45 Cigarette-Equivalents   | 1.30<br>(1.13–1.48) |
| Ischemic heart disease | 85 to 89 | Male   | 56.2 Cigarette-Equivalents | 1.23<br>(1.02–1.44) |
| Ischemic heart disease | 85 to 89 | Female | 0 Cigarette-Equivalents    | 1.00<br>(1.00–1.00) |
| Ischemic heart disease | 85 to 89 | Female | 11.2 Cigarette-Equivalents | 1.28<br>(1.22–1.33) |
| Ischemic heart disease | 85 to 89 | Female | 22.5 Cigarette-Equivalents | 1.33<br>(1.28–1.39) |
| Ischemic heart disease | 85 to 89 | Female | 33.8 Cigarette-Equivalents | 1.45<br>(1.37–1.54) |
| Ischemic heart disease | 85 to 89 | Female | 45 Cigarette-Equivalents   | 1.44<br>(1.24–1.65) |
| Ischemic heart disease | 85 to 89 | Female | 56.2 Cigarette-Equivalents | 1.58<br>(1.33–1.85) |
| Ischemic heart disease | 90 to 94 | Male   | 0 Cigarette-Equivalents    | 1.00<br>(1.00–1.00) |
| Ischemic heart disease | 90 to 94 | Male   | 11.2 Cigarette-Equivalents | 1.19<br>(1.13–1.25) |
| Ischemic heart disease | 90 to 94 | Male   | 22.5 Cigarette-Equivalents | 1.19<br>(1.15–1.23) |
| Ischemic heart disease | 90 to 94 | Male   | 33.8 Cigarette-Equivalents | 1.24<br>(1.17–1.31) |

|                        |          |        |                            |                     |
|------------------------|----------|--------|----------------------------|---------------------|
| Ischemic heart disease | 90 to 94 | Male   | 45 Cigarette-Equivalents   | 1.30<br>(1.13–1.48) |
| Ischemic heart disease | 90 to 94 | Male   | 56.2 Cigarette-Equivalents | 1.23<br>(1.02–1.44) |
| Ischemic heart disease | 90 to 94 | Female | 0 Cigarette-Equivalents    | 1.00<br>(1.00–1.00) |
| Ischemic heart disease | 90 to 94 | Female | 11.2 Cigarette-Equivalents | 1.28<br>(1.22–1.33) |
| Ischemic heart disease | 90 to 94 | Female | 22.5 Cigarette-Equivalents | 1.33<br>(1.28–1.39) |
| Ischemic heart disease | 90 to 94 | Female | 33.8 Cigarette-Equivalents | 1.45<br>(1.37–1.54) |
| Ischemic heart disease | 90 to 94 | Female | 45 Cigarette-Equivalents   | 1.44<br>(1.24–1.65) |
| Ischemic heart disease | 90 to 94 | Female | 56.2 Cigarette-Equivalents | 1.58<br>(1.33–1.85) |
| Ischemic heart disease | 95 plus  | Male   | 0 Cigarette-Equivalents    | 1.00<br>(1.00–1.00) |
| Ischemic heart disease | 95 plus  | Male   | 11.2 Cigarette-Equivalents | 1.00<br>(1.00–1.01) |
| Ischemic heart disease | 95 plus  | Male   | 22.5 Cigarette-Equivalents | 1.00<br>(1.00–1.01) |
| Ischemic heart disease | 95 plus  | Male   | 33.8 Cigarette-Equivalents | 1.00<br>(1.00–1.01) |
| Ischemic heart disease | 95 plus  | Male   | 45 Cigarette-Equivalents   | 1.01<br>(1.00–1.04) |
| Ischemic heart disease | 95 plus  | Male   | 56.2 Cigarette-Equivalents | 1.01<br>(1.00–1.05) |
| Ischemic heart disease | 95 plus  | Female | 0 Cigarette-Equivalents    | 1.00<br>(1.00–1.00) |
| Ischemic heart disease | 95 plus  | Female | 11.2 Cigarette-Equivalents | 1.00<br>(1.00–1.01) |
| Ischemic heart disease | 95 plus  | Female | 22.5 Cigarette-Equivalents | 1.00<br>(1.00–1.01) |
| Ischemic heart disease | 95 plus  | Female | 33.8 Cigarette-Equivalents | 1.00<br>(1.00–1.01) |
| Ischemic heart disease | 95 plus  | Female | 45 Cigarette-Equivalents   | 1.01<br>(1.00–1.04) |
| Ischemic heart disease | 95 plus  | Female | 56.2 Cigarette-Equivalents | 1.02<br>(1.00–1.08) |
| Stroke                 | 30 to 34 | Male   | 0 Cigarette-Equivalents    | 1.00<br>(1.00–1.00) |
| Stroke                 | 30 to 34 | Male   | 10 Cigarette-Equivalents   | 2.36<br>(1.98–2.74) |
| Stroke                 | 30 to 34 | Male   | 20 Cigarette-Equivalents   | 2.32<br>(1.92–2.75) |
| Stroke                 | 30 to 34 | Male   | 30 Cigarette-Equivalents   | 3.18<br>(2.65–3.77) |
| Stroke                 | 30 to 34 | Male   | 40 Cigarette-Equivalents   | 3.43<br>(2.45–4.61) |
| Stroke                 | 30 to 34 | Male   | 50 Cigarette-Equivalents   | 4.46<br>(2.94–6.30) |
| Stroke                 | 30 to 34 | Male   | 60 Cigarette-Equivalents   | 5.32<br>(2.79–8.67) |



|        |          |        |                          |                     |
|--------|----------|--------|--------------------------|---------------------|
| Stroke | 30 to 34 | Female | 0 Cigarette-Equivalents  | 1.00<br>(1.00-1.00) |
| Stroke | 30 to 34 | Female | 10 Cigarette-Equivalents | 2.33<br>(1.69-3.17) |
| Stroke | 30 to 34 | Female | 20 Cigarette-Equivalents | 3.74<br>(2.69-4.98) |
| Stroke | 30 to 34 | Female | 30 Cigarette-Equivalents | 5.49<br>(3.81-7.70) |
| Stroke | 30 to 34 | Female | 40 Cigarette-Equivalents | 7.13<br>(4.10-11.5) |
| Stroke | 30 to 34 | Female | 50 Cigarette-Equivalents | 9.85<br>(5.01-17.9) |
| Stroke | 30 to 34 | Female | 60 Cigarette-Equivalents | 11.7<br>(4.84-23.9) |
| Stroke | 35 to 39 | Male   | 0 Cigarette-Equivalents  | 1.00<br>(1.00-1.00) |
| Stroke | 35 to 39 | Male   | 10 Cigarette-Equivalents | 2.36<br>(1.98-2.74) |
| Stroke | 35 to 39 | Male   | 20 Cigarette-Equivalents | 2.32<br>(1.92-2.75) |
| Stroke | 35 to 39 | Male   | 30 Cigarette-Equivalents | 3.18<br>(2.65-3.77) |
| Stroke | 35 to 39 | Male   | 40 Cigarette-Equivalents | 3.43<br>(2.45-4.61) |
| Stroke | 35 to 39 | Male   | 50 Cigarette-Equivalents | 4.46<br>(2.94-6.30) |
| Stroke | 35 to 39 | Male   | 60 Cigarette-Equivalents | 5.32<br>(2.79-8.67) |
| Stroke | 35 to 39 | Female | 0 Cigarette-Equivalents  | 1.00<br>(1.00-1.00) |
| Stroke | 35 to 39 | Female | 10 Cigarette-Equivalents | 2.33<br>(1.69-3.17) |
| Stroke | 35 to 39 | Female | 20 Cigarette-Equivalents | 3.74<br>(2.69-4.98) |
| Stroke | 35 to 39 | Female | 30 Cigarette-Equivalents | 5.49<br>(3.81-7.70) |
| Stroke | 35 to 39 | Female | 40 Cigarette-Equivalents | 7.13<br>(4.10-11.5) |
| Stroke | 35 to 39 | Female | 50 Cigarette-Equivalents | 9.85<br>(5.01-17.9) |
| Stroke | 35 to 39 | Female | 60 Cigarette-Equivalents | 11.7<br>(4.84-23.9) |
| Stroke | 40 to 44 | Male   | 0 Cigarette-Equivalents  | 1.00<br>(1.00-1.00) |
| Stroke | 40 to 44 | Male   | 10 Cigarette-Equivalents | 2.36<br>(1.98-2.74) |
| Stroke | 40 to 44 | Male   | 20 Cigarette-Equivalents | 2.32<br>(1.92-2.75) |
| Stroke | 40 to 44 | Male   | 30 Cigarette-Equivalents | 3.18<br>(2.65-3.77) |
| Stroke | 40 to 44 | Male   | 40 Cigarette-Equivalents | 3.43<br>(2.45-4.61) |
| Stroke | 40 to 44 | Male   | 50 Cigarette-Equivalents | 4.46<br>(2.94-6.30) |

|        |          |        |                          |                     |
|--------|----------|--------|--------------------------|---------------------|
| Stroke | 40 to 44 | Male   | 60 Cigarette-Equivalents | 5.32<br>(2.79–8.67) |
| Stroke | 40 to 44 | Female | 0 Cigarette-Equivalents  | 1.00<br>(1.00–1.00) |
| Stroke | 40 to 44 | Female | 10 Cigarette-Equivalents | 2.33<br>(1.69–3.17) |
| Stroke | 40 to 44 | Female | 20 Cigarette-Equivalents | 3.74<br>(2.69–4.98) |
| Stroke | 40 to 44 | Female | 30 Cigarette-Equivalents | 5.49<br>(3.81–7.70) |
| Stroke | 40 to 44 | Female | 40 Cigarette-Equivalents | 7.13<br>(4.10–11.5) |
| Stroke | 40 to 44 | Female | 50 Cigarette-Equivalents | 9.85<br>(5.01–17.9) |
| Stroke | 40 to 44 | Female | 60 Cigarette-Equivalents | 11.7<br>(4.84–23.9) |
| Stroke | 45 to 49 | Male   | 0 Cigarette-Equivalents  | 1.00<br>(1.00–1.00) |
| Stroke | 45 to 49 | Male   | 10 Cigarette-Equivalents | 2.11<br>(1.84–2.40) |
| Stroke | 45 to 49 | Male   | 20 Cigarette-Equivalents | 1.97<br>(1.70–2.28) |
| Stroke | 45 to 49 | Male   | 30 Cigarette-Equivalents | 2.67<br>(2.26–3.07) |
| Stroke | 45 to 49 | Male   | 40 Cigarette-Equivalents | 2.73<br>(2.01–3.60) |
| Stroke | 45 to 49 | Male   | 50 Cigarette-Equivalents | 3.49<br>(2.40–4.74) |
| Stroke | 45 to 49 | Male   | 60 Cigarette-Equivalents | 4.16<br>(2.30–6.58) |
| Stroke | 45 to 49 | Female | 0 Cigarette-Equivalents  | 1.00<br>(1.00–1.00) |
| Stroke | 45 to 49 | Female | 10 Cigarette-Equivalents | 2.10<br>(1.60–2.72) |
| Stroke | 45 to 49 | Female | 20 Cigarette-Equivalents | 3.04<br>(2.30–3.94) |
| Stroke | 45 to 49 | Female | 30 Cigarette-Equivalents | 4.21<br>(2.99–5.64) |
| Stroke | 45 to 49 | Female | 40 Cigarette-Equivalents | 5.10<br>(3.04–7.72) |
| Stroke | 45 to 49 | Female | 50 Cigarette-Equivalents | 6.92<br>(3.96–11.4) |
| Stroke | 45 to 49 | Female | 60 Cigarette-Equivalents | 8.28<br>(3.61–16.4) |
| Stroke | 50 to 54 | Male   | 0 Cigarette-Equivalents  | 1.00<br>(1.00–1.00) |
| Stroke | 50 to 54 | Male   | 10 Cigarette-Equivalents | 2.11<br>(1.84–2.40) |
| Stroke | 50 to 54 | Male   | 20 Cigarette-Equivalents | 1.97<br>(1.70–2.28) |
| Stroke | 50 to 54 | Male   | 30 Cigarette-Equivalents | 2.67<br>(2.26–3.07) |
| Stroke | 50 to 54 | Male   | 40 Cigarette-Equivalents | 2.73<br>(2.01–3.60) |

|        |          |        |                          |                     |
|--------|----------|--------|--------------------------|---------------------|
| Stroke | 50 to 54 | Male   | 50 Cigarette-Equivalents | 3.49<br>(2.40–4.74) |
| Stroke | 50 to 54 | Male   | 60 Cigarette-Equivalents | 4.16<br>(2.30–6.58) |
| Stroke | 50 to 54 | Female | 0 Cigarette-Equivalents  | 1.00<br>(1.00–1.00) |
| Stroke | 50 to 54 | Female | 10 Cigarette-Equivalents | 2.10<br>(1.60–2.72) |
| Stroke | 50 to 54 | Female | 20 Cigarette-Equivalents | 3.04<br>(2.30–3.94) |
| Stroke | 50 to 54 | Female | 30 Cigarette-Equivalents | 4.21<br>(2.99–5.64) |
| Stroke | 50 to 54 | Female | 40 Cigarette-Equivalents | 5.10<br>(3.04–7.72) |
| Stroke | 50 to 54 | Female | 50 Cigarette-Equivalents | 6.92<br>(3.96–11.4) |
| Stroke | 50 to 54 | Female | 60 Cigarette-Equivalents | 8.28<br>(3.61–16.4) |
| Stroke | 55 to 59 | Male   | 0 Cigarette-Equivalents  | 1.00<br>(1.00–1.00) |
| Stroke | 55 to 59 | Male   | 10 Cigarette-Equivalents | 1.84<br>(1.64–2.06) |
| Stroke | 55 to 59 | Male   | 20 Cigarette-Equivalents | 1.66<br>(1.45–1.88) |
| Stroke | 55 to 59 | Male   | 30 Cigarette-Equivalents | 2.22<br>(1.94–2.52) |
| Stroke | 55 to 59 | Male   | 40 Cigarette-Equivalents | 2.12<br>(1.62–2.74) |
| Stroke | 55 to 59 | Male   | 50 Cigarette-Equivalents | 2.66<br>(1.92–3.56) |
| Stroke | 55 to 59 | Male   | 60 Cigarette-Equivalents | 3.17<br>(1.80–4.85) |
| Stroke | 55 to 59 | Female | 0 Cigarette-Equivalents  | 1.00<br>(1.00–1.00) |
| Stroke | 55 to 59 | Female | 10 Cigarette-Equivalents | 1.92<br>(1.51–2.33) |
| Stroke | 55 to 59 | Female | 20 Cigarette-Equivalents | 2.44<br>(1.88–3.06) |
| Stroke | 55 to 59 | Female | 30 Cigarette-Equivalents | 3.14<br>(2.33–4.02) |
| Stroke | 55 to 59 | Female | 40 Cigarette-Equivalents | 3.64<br>(2.30–5.22) |
| Stroke | 55 to 59 | Female | 50 Cigarette-Equivalents | 5.00<br>(3.06–7.75) |
| Stroke | 55 to 59 | Female | 60 Cigarette-Equivalents | 5.94<br>(3.01–11.1) |
| Stroke | 60 to 64 | Male   | 0 Cigarette-Equivalents  | 1.00<br>(1.00–1.00) |
| Stroke | 60 to 64 | Male   | 10 Cigarette-Equivalents | 1.84<br>(1.64–2.06) |
| Stroke | 60 to 64 | Male   | 20 Cigarette-Equivalents | 1.66<br>(1.45–1.88) |
| Stroke | 60 to 64 | Male   | 30 Cigarette-Equivalents | 2.22<br>(1.94–2.52) |

|        |          |        |                          |                     |
|--------|----------|--------|--------------------------|---------------------|
| Stroke | 60 to 64 | Male   | 40 Cigarette-Equivalents | 2.12<br>(1.62–2.74) |
| Stroke | 60 to 64 | Male   | 50 Cigarette-Equivalents | 2.66<br>(1.92–3.56) |
| Stroke | 60 to 64 | Male   | 60 Cigarette-Equivalents | 3.17<br>(1.80–4.85) |
| Stroke | 60 to 64 | Female | 0 Cigarette-Equivalents  | 1.00<br>(1.00–1.00) |
| Stroke | 60 to 64 | Female | 10 Cigarette-Equivalents | 1.92<br>(1.51–2.33) |
| Stroke | 60 to 64 | Female | 20 Cigarette-Equivalents | 2.44<br>(1.88–3.06) |
| Stroke | 60 to 64 | Female | 30 Cigarette-Equivalents | 3.14<br>(2.33–4.02) |
| Stroke | 60 to 64 | Female | 40 Cigarette-Equivalents | 3.64<br>(2.30–5.22) |
| Stroke | 60 to 64 | Female | 50 Cigarette-Equivalents | 5.00<br>(3.06–7.75) |
| Stroke | 60 to 64 | Female | 60 Cigarette-Equivalents | 5.94<br>(3.01–11.1) |
| Stroke | 65 to 69 | Male   | 0 Cigarette-Equivalents  | 1.00<br>(1.00–1.00) |
| Stroke | 65 to 69 | Male   | 10 Cigarette-Equivalents | 1.61<br>(1.46–1.76) |
| Stroke | 65 to 69 | Male   | 20 Cigarette-Equivalents | 1.42<br>(1.28–1.56) |
| Stroke | 65 to 69 | Male   | 30 Cigarette-Equivalents | 1.85<br>(1.66–2.04) |
| Stroke | 65 to 69 | Male   | 40 Cigarette-Equivalents | 1.66<br>(1.31–2.06) |
| Stroke | 65 to 69 | Male   | 50 Cigarette-Equivalents | 2.05<br>(1.53–2.61) |
| Stroke | 65 to 69 | Male   | 60 Cigarette-Equivalents | 2.40<br>(1.46–3.51) |
| Stroke | 65 to 69 | Female | 0 Cigarette-Equivalents  | 1.00<br>(1.00–1.00) |
| Stroke | 65 to 69 | Female | 10 Cigarette-Equivalents | 1.72<br>(1.44–2.01) |
| Stroke | 65 to 69 | Female | 20 Cigarette-Equivalents | 1.94<br>(1.60–2.28) |
| Stroke | 65 to 69 | Female | 30 Cigarette-Equivalents | 2.30<br>(1.87–2.82) |
| Stroke | 65 to 69 | Female | 40 Cigarette-Equivalents | 2.59<br>(1.81–3.59) |
| Stroke | 65 to 69 | Female | 50 Cigarette-Equivalents | 3.57<br>(2.40–4.97) |
| Stroke | 65 to 69 | Female | 60 Cigarette-Equivalents | 4.29<br>(2.32–7.08) |
| Stroke | 70 to 74 | Male   | 0 Cigarette-Equivalents  | 1.00<br>(1.00–1.00) |
| Stroke | 70 to 74 | Male   | 10 Cigarette-Equivalents | 1.61<br>(1.46–1.76) |
| Stroke | 70 to 74 | Male   | 20 Cigarette-Equivalents | 1.42<br>(1.28–1.56) |

|        |          |        |                          |                     |
|--------|----------|--------|--------------------------|---------------------|
| Stroke | 70 to 74 | Male   | 30 Cigarette-Equivalents | 1.85<br>(1.66–2.04) |
| Stroke | 70 to 74 | Male   | 40 Cigarette-Equivalents | 1.66<br>(1.31–2.06) |
| Stroke | 70 to 74 | Male   | 50 Cigarette-Equivalents | 2.05<br>(1.53–2.61) |
| Stroke | 70 to 74 | Male   | 60 Cigarette-Equivalents | 2.40<br>(1.46–3.51) |
| Stroke | 70 to 74 | Female | 0 Cigarette-Equivalents  | 1.00<br>(1.00–1.00) |
| Stroke | 70 to 74 | Female | 10 Cigarette-Equivalents | 1.72<br>(1.44–2.01) |
| Stroke | 70 to 74 | Female | 20 Cigarette-Equivalents | 1.94<br>(1.60–2.28) |
| Stroke | 70 to 74 | Female | 30 Cigarette-Equivalents | 2.30<br>(1.87–2.82) |
| Stroke | 70 to 74 | Female | 40 Cigarette-Equivalents | 2.59<br>(1.81–3.59) |
| Stroke | 70 to 74 | Female | 50 Cigarette-Equivalents | 3.57<br>(2.40–4.97) |
| Stroke | 70 to 74 | Female | 60 Cigarette-Equivalents | 4.29<br>(2.32–7.08) |
| Stroke | 75 to 79 | Male   | 0 Cigarette-Equivalents  | 1.00<br>(1.00–1.00) |
| Stroke | 75 to 79 | Male   | 10 Cigarette-Equivalents | 1.39<br>(1.29–1.48) |
| Stroke | 75 to 79 | Male   | 20 Cigarette-Equivalents | 1.22<br>(1.14–1.31) |
| Stroke | 75 to 79 | Male   | 30 Cigarette-Equivalents | 1.52<br>(1.40–1.64) |
| Stroke | 75 to 79 | Male   | 40 Cigarette-Equivalents | 1.34<br>(1.12–1.59) |
| Stroke | 75 to 79 | Male   | 50 Cigarette-Equivalents | 1.58<br>(1.20–1.98) |
| Stroke | 75 to 79 | Male   | 60 Cigarette-Equivalents | 1.84<br>(1.18–2.68) |
| Stroke | 75 to 79 | Female | 0 Cigarette-Equivalents  | 1.00<br>(1.00–1.00) |
| Stroke | 75 to 79 | Female | 10 Cigarette-Equivalents | 1.48<br>(1.32–1.64) |
| Stroke | 75 to 79 | Female | 20 Cigarette-Equivalents | 1.53<br>(1.33–1.72) |
| Stroke | 75 to 79 | Female | 30 Cigarette-Equivalents | 1.72<br>(1.47–2.01) |
| Stroke | 75 to 79 | Female | 40 Cigarette-Equivalents | 1.78<br>(1.32–2.38) |
| Stroke | 75 to 79 | Female | 50 Cigarette-Equivalents | 2.35<br>(1.70–3.09) |
| Stroke | 75 to 79 | Female | 60 Cigarette-Equivalents | 2.78<br>(1.64–4.28) |
| Stroke | 80 to 84 | Male   | 0 Cigarette-Equivalents  | 1.00<br>(1.00–1.00) |
| Stroke | 80 to 84 | Male   | 10 Cigarette-Equivalents | 1.39<br>(1.29–1.48) |

|        |          |        |                          |                     |
|--------|----------|--------|--------------------------|---------------------|
| Stroke | 80 to 84 | Male   | 20 Cigarette-Equivalents | 1.22<br>(1.14–1.31) |
| Stroke | 80 to 84 | Male   | 30 Cigarette-Equivalents | 1.52<br>(1.40–1.64) |
| Stroke | 80 to 84 | Male   | 40 Cigarette-Equivalents | 1.34<br>(1.12–1.59) |
| Stroke | 80 to 84 | Male   | 50 Cigarette-Equivalents | 1.58<br>(1.20–1.98) |
| Stroke | 80 to 84 | Male   | 60 Cigarette-Equivalents | 1.84<br>(1.18–2.68) |
| Stroke | 80 to 84 | Female | 0 Cigarette-Equivalents  | 1.00<br>(1.00–1.00) |
| Stroke | 80 to 84 | Female | 10 Cigarette-Equivalents | 1.48<br>(1.32–1.64) |
| Stroke | 80 to 84 | Female | 20 Cigarette-Equivalents | 1.53<br>(1.33–1.72) |
| Stroke | 80 to 84 | Female | 30 Cigarette-Equivalents | 1.72<br>(1.47–2.01) |
| Stroke | 80 to 84 | Female | 40 Cigarette-Equivalents | 1.78<br>(1.32–2.38) |
| Stroke | 80 to 84 | Female | 50 Cigarette-Equivalents | 2.35<br>(1.70–3.09) |
| Stroke | 80 to 84 | Female | 60 Cigarette-Equivalents | 2.78<br>(1.64–4.28) |
| Stroke | 85 to 89 | Male   | 0 Cigarette-Equivalents  | 1.00<br>(1.00–1.00) |
| Stroke | 85 to 89 | Male   | 10 Cigarette-Equivalents | 1.15<br>(1.10–1.20) |
| Stroke | 85 to 89 | Male   | 20 Cigarette-Equivalents | 1.08<br>(1.04–1.12) |
| Stroke | 85 to 89 | Male   | 30 Cigarette-Equivalents | 1.21<br>(1.15–1.26) |
| Stroke | 85 to 89 | Male   | 40 Cigarette-Equivalents | 1.12<br>(1.02–1.22) |
| Stroke | 85 to 89 | Male   | 50 Cigarette-Equivalents | 1.21<br>(1.00–1.46) |
| Stroke | 85 to 89 | Male   | 60 Cigarette-Equivalents | 1.39<br>(1.00–1.89) |
| Stroke | 85 to 89 | Female | 0 Cigarette-Equivalents  | 1.00<br>(1.00–1.00) |
| Stroke | 85 to 89 | Female | 10 Cigarette-Equivalents | 1.20<br>(1.12–1.30) |
| Stroke | 85 to 89 | Female | 20 Cigarette-Equivalents | 1.19<br>(1.13–1.27) |
| Stroke | 85 to 89 | Female | 30 Cigarette-Equivalents | 1.29<br>(1.17–1.41) |
| Stroke | 85 to 89 | Female | 40 Cigarette-Equivalents | 1.21<br>(1.00–1.43) |
| Stroke | 85 to 89 | Female | 50 Cigarette-Equivalents | 1.45<br>(1.14–1.81) |
| Stroke | 85 to 89 | Female | 60 Cigarette-Equivalents | 1.69<br>(1.09–2.38) |
| Stroke | 90 to 94 | Male   | 0 Cigarette-Equivalents  | 1.00<br>(1.00–1.00) |

|        |          |        |                          |                     |
|--------|----------|--------|--------------------------|---------------------|
| Stroke | 90 to 94 | Male   | 10 Cigarette-Equivalents | 1·15<br>(1·10–1·20) |
| Stroke | 90 to 94 | Male   | 20 Cigarette-Equivalents | 1·08<br>(1·04–1·12) |
| Stroke | 90 to 94 | Male   | 30 Cigarette-Equivalents | 1·21<br>(1·15–1·26) |
| Stroke | 90 to 94 | Male   | 40 Cigarette-Equivalents | 1·12<br>(1·02–1·22) |
| Stroke | 90 to 94 | Male   | 50 Cigarette-Equivalents | 1·21<br>(1·00–1·46) |
| Stroke | 90 to 94 | Male   | 60 Cigarette-Equivalents | 1·39<br>(1·00–1·89) |
| Stroke | 90 to 94 | Female | 0 Cigarette-Equivalents  | 1·00<br>(1·00–1·00) |
| Stroke | 90 to 94 | Female | 10 Cigarette-Equivalents | 1·20<br>(1·12–1·30) |
| Stroke | 90 to 94 | Female | 20 Cigarette-Equivalents | 1·19<br>(1·13–1·27) |
| Stroke | 90 to 94 | Female | 30 Cigarette-Equivalents | 1·29<br>(1·17–1·41) |
| Stroke | 90 to 94 | Female | 40 Cigarette-Equivalents | 1·21<br>(1·00–1·43) |
| Stroke | 90 to 94 | Female | 50 Cigarette-Equivalents | 1·45<br>(1·14–1·81) |
| Stroke | 90 to 94 | Female | 60 Cigarette-Equivalents | 1·69<br>(1·09–2·38) |
| Stroke | 95 plus  | Male   | 0 Cigarette-Equivalents  | 1·00<br>(1·00–1·00) |
| Stroke | 95 plus  | Male   | 10 Cigarette-Equivalents | 1·01<br>(1·00–1·04) |
| Stroke | 95 plus  | Male   | 20 Cigarette-Equivalents | 1·00<br>(1·00–1·02) |
| Stroke | 95 plus  | Male   | 30 Cigarette-Equivalents | 1·01<br>(1·00–1·03) |
| Stroke | 95 plus  | Male   | 40 Cigarette-Equivalents | 1·01<br>(1·00–1·04) |
| Stroke | 95 plus  | Male   | 50 Cigarette-Equivalents | 1·04<br>(1·00–1·14) |
| Stroke | 95 plus  | Male   | 60 Cigarette-Equivalents | 1·10<br>(1·00–1·37) |
| Stroke | 95 plus  | Female | 0 Cigarette-Equivalents  | 1·00<br>(1·00–1·00) |
| Stroke | 95 plus  | Female | 10 Cigarette-Equivalents | 1·01<br>(1·00–1·03) |
| Stroke | 95 plus  | Female | 20 Cigarette-Equivalents | 1·00<br>(1·00–1·01) |
| Stroke | 95 plus  | Female | 30 Cigarette-Equivalents | 1·01<br>(1·00–1·02) |
| Stroke | 95 plus  | Female | 40 Cigarette-Equivalents | 1·01<br>(1·00–1·04) |
| Stroke | 95 plus  | Female | 50 Cigarette-Equivalents | 1·03<br>(1·00–1·11) |
| Stroke | 95 plus  | Female | 60 Cigarette-Equivalents | 1·04<br>(1·00–1·23) |

|                                 |          |        |                            |                     |
|---------------------------------|----------|--------|----------------------------|---------------------|
| Atrial fibrillation and flutter | 30 to 34 | Female | 0 Cigarette-Equivalents    | 1-00<br>(1-00-1-00) |
| Atrial fibrillation and flutter | 30 to 34 | Female | 6.3 Cigarette-Equivalents  | 1-53<br>(1-04-2-15) |
| Atrial fibrillation and flutter | 30 to 34 | Female | 12.6 Cigarette-Equivalents | 1-90<br>(1-24-2-79) |
| Atrial fibrillation and flutter | 30 to 34 | Female | 18.9 Cigarette-Equivalents | 2-22<br>(1-43-3-33) |
| Atrial fibrillation and flutter | 30 to 34 | Female | 25.2 Cigarette-Equivalents | 2-59<br>(1-54-4-08) |
| Atrial fibrillation and flutter | 30 to 34 | Male   | 0 Cigarette-Equivalents    | 1-00<br>(1-00-1-00) |
| Atrial fibrillation and flutter | 30 to 34 | Male   | 6.3 Cigarette-Equivalents  | 1-53<br>(1-04-2-15) |
| Atrial fibrillation and flutter | 30 to 34 | Male   | 12.6 Cigarette-Equivalents | 1-90<br>(1-24-2-79) |
| Atrial fibrillation and flutter | 30 to 34 | Male   | 18.9 Cigarette-Equivalents | 2-22<br>(1-43-3-33) |
| Atrial fibrillation and flutter | 30 to 34 | Male   | 25.2 Cigarette-Equivalents | 2-59<br>(1-54-4-08) |
| Atrial fibrillation and flutter | 35 to 39 | Male   | 0 Cigarette-Equivalents    | 1-00<br>(1-00-1-00) |
| Atrial fibrillation and flutter | 35 to 39 | Male   | 6.3 Cigarette-Equivalents  | 1-53<br>(1-04-2-15) |
| Atrial fibrillation and flutter | 35 to 39 | Male   | 12.6 Cigarette-Equivalents | 1-90<br>(1-24-2-79) |
| Atrial fibrillation and flutter | 35 to 39 | Male   | 18.9 Cigarette-Equivalents | 2-22<br>(1-43-3-33) |
| Atrial fibrillation and flutter | 35 to 39 | Male   | 25.2 Cigarette-Equivalents | 2-59<br>(1-54-4-08) |
| Atrial fibrillation and flutter | 35 to 39 | Female | 0 Cigarette-Equivalents    | 1-00<br>(1-00-1-00) |
| Atrial fibrillation and flutter | 35 to 39 | Female | 6.3 Cigarette-Equivalents  | 1-53<br>(1-04-2-15) |
| Atrial fibrillation and flutter | 35 to 39 | Female | 12.6 Cigarette-Equivalents | 1-90<br>(1-24-2-79) |
| Atrial fibrillation and flutter | 35 to 39 | Female | 18.9 Cigarette-Equivalents | 2-22<br>(1-43-3-33) |
| Atrial fibrillation and flutter | 35 to 39 | Female | 25.2 Cigarette-Equivalents | 2-59<br>(1-54-4-08) |
| Atrial fibrillation and flutter | 40 to 44 | Female | 0 Cigarette-Equivalents    | 1-00<br>(1-00-1-00) |
| Atrial fibrillation and flutter | 40 to 44 | Female | 6.3 Cigarette-Equivalents  | 1-53<br>(1-04-2-15) |
| Atrial fibrillation and flutter | 40 to 44 | Female | 12.6 Cigarette-Equivalents | 1-90<br>(1-24-2-79) |
| Atrial fibrillation and flutter | 40 to 44 | Female | 18.9 Cigarette-Equivalents | 2-22<br>(1-43-3-33) |
| Atrial fibrillation and flutter | 40 to 44 | Female | 25.2 Cigarette-Equivalents | 2-59<br>(1-54-4-08) |
| Atrial fibrillation and flutter | 40 to 44 | Male   | 0 Cigarette-Equivalents    | 1-00<br>(1-00-1-00) |
| Atrial fibrillation and flutter | 40 to 44 | Male   | 6.3 Cigarette-Equivalents  | 1-53<br>(1-04-2-15) |



|                                 |          |        |                            |                     |
|---------------------------------|----------|--------|----------------------------|---------------------|
| Atrial fibrillation and flutter | 40 to 44 | Male   | 12.6 Cigarette-Equivalents | 1.90<br>(1.24–2.79) |
| Atrial fibrillation and flutter | 40 to 44 | Male   | 18.9 Cigarette-Equivalents | 2.22<br>(1.43–3.33) |
| Atrial fibrillation and flutter | 40 to 44 | Male   | 25.2 Cigarette-Equivalents | 2.59<br>(1.54–4.08) |
| Atrial fibrillation and flutter | 45 to 49 | Male   | 0 Cigarette-Equivalents    | 1.00<br>(1.00–1.00) |
| Atrial fibrillation and flutter | 45 to 49 | Male   | 6.3 Cigarette-Equivalents  | 1.51<br>(1.05–2.05) |
| Atrial fibrillation and flutter | 45 to 49 | Male   | 12.6 Cigarette-Equivalents | 1.77<br>(1.21–2.55) |
| Atrial fibrillation and flutter | 45 to 49 | Male   | 18.9 Cigarette-Equivalents | 2.00<br>(1.35–2.91) |
| Atrial fibrillation and flutter | 45 to 49 | Male   | 25.2 Cigarette-Equivalents | 2.26<br>(1.45–3.40) |
| Atrial fibrillation and flutter | 45 to 49 | Female | 0 Cigarette-Equivalents    | 1.00<br>(1.00–1.00) |
| Atrial fibrillation and flutter | 45 to 49 | Female | 6.3 Cigarette-Equivalents  | 1.51<br>(1.05–2.05) |
| Atrial fibrillation and flutter | 45 to 49 | Female | 12.6 Cigarette-Equivalents | 1.77<br>(1.21–2.55) |
| Atrial fibrillation and flutter | 45 to 49 | Female | 18.9 Cigarette-Equivalents | 2.00<br>(1.35–2.91) |
| Atrial fibrillation and flutter | 45 to 49 | Female | 25.2 Cigarette-Equivalents | 2.26<br>(1.45–3.40) |
| Atrial fibrillation and flutter | 50 to 54 | Female | 0 Cigarette-Equivalents    | 1.00<br>(1.00–1.00) |
| Atrial fibrillation and flutter | 50 to 54 | Female | 6.3 Cigarette-Equivalents  | 1.51<br>(1.05–2.05) |
| Atrial fibrillation and flutter | 50 to 54 | Female | 12.6 Cigarette-Equivalents | 1.77<br>(1.21–2.55) |
| Atrial fibrillation and flutter | 50 to 54 | Female | 18.9 Cigarette-Equivalents | 2.00<br>(1.35–2.91) |
| Atrial fibrillation and flutter | 50 to 54 | Female | 25.2 Cigarette-Equivalents | 2.26<br>(1.45–3.40) |
| Atrial fibrillation and flutter | 50 to 54 | Male   | 0 Cigarette-Equivalents    | 1.00<br>(1.00–1.00) |
| Atrial fibrillation and flutter | 50 to 54 | Male   | 6.3 Cigarette-Equivalents  | 1.51<br>(1.05–2.05) |
| Atrial fibrillation and flutter | 50 to 54 | Male   | 12.6 Cigarette-Equivalents | 1.77<br>(1.21–2.55) |
| Atrial fibrillation and flutter | 50 to 54 | Male   | 18.9 Cigarette-Equivalents | 2.00<br>(1.35–2.91) |
| Atrial fibrillation and flutter | 50 to 54 | Male   | 25.2 Cigarette-Equivalents | 2.26<br>(1.45–3.40) |
| Atrial fibrillation and flutter | 55 to 59 | Male   | 0 Cigarette-Equivalents    | 1.00<br>(1.00–1.00) |
| Atrial fibrillation and flutter | 55 to 59 | Male   | 6.3 Cigarette-Equivalents  | 1.47<br>(1.03–1.94) |
| Atrial fibrillation and flutter | 55 to 59 | Male   | 12.6 Cigarette-Equivalents | 1.63<br>(1.15–2.24) |
| Atrial fibrillation and flutter | 55 to 59 | Male   | 18.9 Cigarette-Equivalents | 1.77<br>(1.25–2.48) |

|                                 |          |        |                            |                     |
|---------------------------------|----------|--------|----------------------------|---------------------|
| Atrial fibrillation and flutter | 55 to 59 | Male   | 25.2 Cigarette-Equivalents | 1.95<br>(1.35–2.87) |
| Atrial fibrillation and flutter | 55 to 59 | Female | 0 Cigarette-Equivalents    | 1.00<br>(1.00–1.00) |
| Atrial fibrillation and flutter | 55 to 59 | Female | 6.3 Cigarette-Equivalents  | 1.47<br>(1.03–1.94) |
| Atrial fibrillation and flutter | 55 to 59 | Female | 12.6 Cigarette-Equivalents | 1.63<br>(1.15–2.24) |
| Atrial fibrillation and flutter | 55 to 59 | Female | 18.9 Cigarette-Equivalents | 1.77<br>(1.25–2.48) |
| Atrial fibrillation and flutter | 55 to 59 | Female | 25.2 Cigarette-Equivalents | 1.95<br>(1.35–2.87) |
| Atrial fibrillation and flutter | 60 to 64 | Female | 0 Cigarette-Equivalents    | 1.00<br>(1.00–1.00) |
| Atrial fibrillation and flutter | 60 to 64 | Female | 6.3 Cigarette-Equivalents  | 1.47<br>(1.03–1.94) |
| Atrial fibrillation and flutter | 60 to 64 | Female | 12.6 Cigarette-Equivalents | 1.63<br>(1.15–2.24) |
| Atrial fibrillation and flutter | 60 to 64 | Female | 18.9 Cigarette-Equivalents | 1.77<br>(1.25–2.48) |
| Atrial fibrillation and flutter | 60 to 64 | Female | 25.2 Cigarette-Equivalents | 1.95<br>(1.35–2.87) |
| Atrial fibrillation and flutter | 60 to 64 | Male   | 0 Cigarette-Equivalents    | 1.00<br>(1.00–1.00) |
| Atrial fibrillation and flutter | 60 to 64 | Male   | 6.3 Cigarette-Equivalents  | 1.47<br>(1.03–1.94) |
| Atrial fibrillation and flutter | 60 to 64 | Male   | 12.6 Cigarette-Equivalents | 1.63<br>(1.15–2.24) |
| Atrial fibrillation and flutter | 60 to 64 | Male   | 18.9 Cigarette-Equivalents | 1.77<br>(1.25–2.48) |
| Atrial fibrillation and flutter | 60 to 64 | Male   | 25.2 Cigarette-Equivalents | 1.95<br>(1.35–2.87) |
| Atrial fibrillation and flutter | 65 to 69 | Male   | 0 Cigarette-Equivalents    | 1.00<br>(1.00–1.00) |
| Atrial fibrillation and flutter | 65 to 69 | Male   | 6.3 Cigarette-Equivalents  | 1.43<br>(1.04–1.79) |
| Atrial fibrillation and flutter | 65 to 69 | Male   | 12.6 Cigarette-Equivalents | 1.46<br>(1.10–1.90) |
| Atrial fibrillation and flutter | 65 to 69 | Male   | 18.9 Cigarette-Equivalents | 1.52<br>(1.13–2.05) |
| Atrial fibrillation and flutter | 65 to 69 | Male   | 25.2 Cigarette-Equivalents | 1.63<br>(1.23–2.19) |
| Atrial fibrillation and flutter | 65 to 69 | Female | 0 Cigarette-Equivalents    | 1.00<br>(1.00–1.00) |
| Atrial fibrillation and flutter | 65 to 69 | Female | 6.3 Cigarette-Equivalents  | 1.43<br>(1.04–1.79) |
| Atrial fibrillation and flutter | 65 to 69 | Female | 12.6 Cigarette-Equivalents | 1.46<br>(1.10–1.90) |
| Atrial fibrillation and flutter | 65 to 69 | Female | 18.9 Cigarette-Equivalents | 1.52<br>(1.13–2.05) |
| Atrial fibrillation and flutter | 65 to 69 | Female | 25.2 Cigarette-Equivalents | 1.63<br>(1.23–2.19) |
| Atrial fibrillation and flutter | 70 to 74 | Female | 0 Cigarette-Equivalents    | 1.00<br>(1.00–1.00) |

|                                 |          |        |                            |                     |
|---------------------------------|----------|--------|----------------------------|---------------------|
| Atrial fibrillation and flutter | 70 to 74 | Female | 6.3 Cigarette-Equivalents  | 1:43<br>(1:04-1:79) |
| Atrial fibrillation and flutter | 70 to 74 | Female | 12.6 Cigarette-Equivalents | 1:46<br>(1:10-1:90) |
| Atrial fibrillation and flutter | 70 to 74 | Female | 18.9 Cigarette-Equivalents | 1:52<br>(1:13-2:05) |
| Atrial fibrillation and flutter | 70 to 74 | Female | 25.2 Cigarette-Equivalents | 1:63<br>(1:23-2:19) |
| Atrial fibrillation and flutter | 70 to 74 | Male   | 0 Cigarette-Equivalents    | 1:00<br>(1:00-1:00) |
| Atrial fibrillation and flutter | 70 to 74 | Male   | 6.3 Cigarette-Equivalents  | 1:43<br>(1:04-1:79) |
| Atrial fibrillation and flutter | 70 to 74 | Male   | 12.6 Cigarette-Equivalents | 1:46<br>(1:10-1:90) |
| Atrial fibrillation and flutter | 70 to 74 | Male   | 18.9 Cigarette-Equivalents | 1:52<br>(1:13-2:05) |
| Atrial fibrillation and flutter | 70 to 74 | Male   | 25.2 Cigarette-Equivalents | 1:63<br>(1:23-2:19) |
| Atrial fibrillation and flutter | 75 to 79 | Male   | 0 Cigarette-Equivalents    | 1:00<br>(1:00-1:00) |
| Atrial fibrillation and flutter | 75 to 79 | Male   | 6.3 Cigarette-Equivalents  | 1:32<br>(1:05-1:59) |
| Atrial fibrillation and flutter | 75 to 79 | Male   | 12.6 Cigarette-Equivalents | 1:28<br>(1:02-1:61) |
| Atrial fibrillation and flutter | 75 to 79 | Male   | 18.9 Cigarette-Equivalents | 1:30<br>(1:00-1:67) |
| Atrial fibrillation and flutter | 75 to 79 | Male   | 25.2 Cigarette-Equivalents | 1:37<br>(1:10-1:74) |
| Atrial fibrillation and flutter | 75 to 79 | Female | 0 Cigarette-Equivalents    | 1:00<br>(1:00-1:00) |
| Atrial fibrillation and flutter | 75 to 79 | Female | 6.3 Cigarette-Equivalents  | 1:32<br>(1:05-1:59) |
| Atrial fibrillation and flutter | 75 to 79 | Female | 12.6 Cigarette-Equivalents | 1:28<br>(1:02-1:61) |
| Atrial fibrillation and flutter | 75 to 79 | Female | 18.9 Cigarette-Equivalents | 1:30<br>(1:00-1:67) |
| Atrial fibrillation and flutter | 75 to 79 | Female | 25.2 Cigarette-Equivalents | 1:37<br>(1:10-1:74) |
| Atrial fibrillation and flutter | 80 to 84 | Female | 0 Cigarette-Equivalents    | 1:00<br>(1:00-1:00) |
| Atrial fibrillation and flutter | 80 to 84 | Female | 6.3 Cigarette-Equivalents  | 1:32<br>(1:05-1:59) |
| Atrial fibrillation and flutter | 80 to 84 | Female | 12.6 Cigarette-Equivalents | 1:28<br>(1:02-1:61) |
| Atrial fibrillation and flutter | 80 to 84 | Female | 18.9 Cigarette-Equivalents | 1:30<br>(1:00-1:67) |
| Atrial fibrillation and flutter | 80 to 84 | Female | 25.2 Cigarette-Equivalents | 1:37<br>(1:10-1:74) |
| Atrial fibrillation and flutter | 80 to 84 | Male   | 0 Cigarette-Equivalents    | 1:00<br>(1:00-1:00) |
| Atrial fibrillation and flutter | 80 to 84 | Male   | 6.3 Cigarette-Equivalents  | 1:32<br>(1:05-1:59) |
| Atrial fibrillation and flutter | 80 to 84 | Male   | 12.6 Cigarette-Equivalents | 1:28<br>(1:02-1:61) |

|                                 |          |        |                            |                     |
|---------------------------------|----------|--------|----------------------------|---------------------|
| Atrial fibrillation and flutter | 80 to 84 | Male   | 18.9 Cigarette-Equivalents | 1-30<br>(1-00-1-67) |
| Atrial fibrillation and flutter | 80 to 84 | Male   | 25.2 Cigarette-Equivalents | 1-37<br>(1-10-1-74) |
| Atrial fibrillation and flutter | 85 to 89 | Male   | 0 Cigarette-Equivalents    | 1-00<br>(1-00-1-00) |
| Atrial fibrillation and flutter | 85 to 89 | Male   | 6.3 Cigarette-Equivalents  | 1-18<br>(1-00-1-36) |
| Atrial fibrillation and flutter | 85 to 89 | Male   | 12.6 Cigarette-Equivalents | 1-13<br>(1-00-1-32) |
| Atrial fibrillation and flutter | 85 to 89 | Male   | 18.9 Cigarette-Equivalents | 1-12<br>(1-00-1-38) |
| Atrial fibrillation and flutter | 85 to 89 | Male   | 25.2 Cigarette-Equivalents | 1-16<br>(1-00-1-37) |
| Atrial fibrillation and flutter | 85 to 89 | Female | 0 Cigarette-Equivalents    | 1-00<br>(1-00-1-00) |
| Atrial fibrillation and flutter | 85 to 89 | Female | 6.3 Cigarette-Equivalents  | 1-18<br>(1-00-1-36) |
| Atrial fibrillation and flutter | 85 to 89 | Female | 12.6 Cigarette-Equivalents | 1-13<br>(1-00-1-32) |
| Atrial fibrillation and flutter | 85 to 89 | Female | 18.9 Cigarette-Equivalents | 1-12<br>(1-00-1-38) |
| Atrial fibrillation and flutter | 85 to 89 | Female | 25.2 Cigarette-Equivalents | 1-16<br>(1-00-1-37) |
| Atrial fibrillation and flutter | 90 to 94 | Female | 0 Cigarette-Equivalents    | 1-00<br>(1-00-1-00) |
| Atrial fibrillation and flutter | 90 to 94 | Female | 6.3 Cigarette-Equivalents  | 1-18<br>(1-00-1-36) |
| Atrial fibrillation and flutter | 90 to 94 | Female | 12.6 Cigarette-Equivalents | 1-13<br>(1-00-1-32) |
| Atrial fibrillation and flutter | 90 to 94 | Female | 18.9 Cigarette-Equivalents | 1-12<br>(1-00-1-38) |
| Atrial fibrillation and flutter | 90 to 94 | Female | 25.2 Cigarette-Equivalents | 1-16<br>(1-00-1-37) |
| Atrial fibrillation and flutter | 90 to 94 | Male   | 0 Cigarette-Equivalents    | 1-00<br>(1-00-1-00) |
| Atrial fibrillation and flutter | 90 to 94 | Male   | 6.3 Cigarette-Equivalents  | 1-18<br>(1-00-1-36) |
| Atrial fibrillation and flutter | 90 to 94 | Male   | 12.6 Cigarette-Equivalents | 1-13<br>(1-00-1-32) |
| Atrial fibrillation and flutter | 90 to 94 | Male   | 18.9 Cigarette-Equivalents | 1-12<br>(1-00-1-38) |
| Atrial fibrillation and flutter | 90 to 94 | Male   | 25.2 Cigarette-Equivalents | 1-16<br>(1-00-1-37) |
| Atrial fibrillation and flutter | 95 plus  | Male   | 0 Cigarette-Equivalents    | 1-00<br>(1-00-1-00) |
| Atrial fibrillation and flutter | 95 plus  | Male   | 6.3 Cigarette-Equivalents  | 1-01<br>(1-00-1-05) |
| Atrial fibrillation and flutter | 95 plus  | Male   | 12.6 Cigarette-Equivalents | 1-02<br>(1-00-1-11) |
| Atrial fibrillation and flutter | 95 plus  | Male   | 18.9 Cigarette-Equivalents | 1-03<br>(1-00-1-16) |
| Atrial fibrillation and flutter | 95 plus  | Male   | 25.2 Cigarette-Equivalents | 1-01<br>(1-00-1-09) |

|                                 |          |        |                            |                     |
|---------------------------------|----------|--------|----------------------------|---------------------|
| Atrial fibrillation and flutter | 95 plus  | Female | 0 Cigarette-Equivalents    | 1-00<br>(1-00-1-00) |
| Atrial fibrillation and flutter | 95 plus  | Female | 6.3 Cigarette-Equivalents  | 1-01<br>(1-00-1-05) |
| Atrial fibrillation and flutter | 95 plus  | Female | 12.6 Cigarette-Equivalents | 1-02<br>(1-00-1-11) |
| Atrial fibrillation and flutter | 95 plus  | Female | 18.9 Cigarette-Equivalents | 1-03<br>(1-00-1-16) |
| Atrial fibrillation and flutter | 95 plus  | Female | 25.2 Cigarette-Equivalents | 1-01<br>(1-00-1-09) |
| Aortic aneurysm                 | 30 to 34 | Female | 0 Cigarette-Equivalents    | 1-00<br>(1-00-1-00) |
| Aortic aneurysm                 | 30 to 34 | Female | 12 Cigarette-Equivalents   | 5-05<br>(3-68-6-52) |
| Aortic aneurysm                 | 30 to 34 | Female | 24 Cigarette-Equivalents   | 9-53<br>(6-98-12-5) |
| Aortic aneurysm                 | 30 to 34 | Female | 36 Cigarette-Equivalents   | 12-4<br>(7-77-18-2) |
| Aortic aneurysm                 | 30 to 34 | Female | 48 Cigarette-Equivalents   | 14-5<br>(7-45-24-3) |
| Aortic aneurysm                 | 30 to 34 | Male   | 0 Cigarette-Equivalents    | 1-00<br>(1-00-1-00) |
| Aortic aneurysm                 | 30 to 34 | Male   | 12 Cigarette-Equivalents   | 5-05<br>(3-68-6-52) |
| Aortic aneurysm                 | 30 to 34 | Male   | 24 Cigarette-Equivalents   | 9-53<br>(6-98-12-5) |
| Aortic aneurysm                 | 30 to 34 | Male   | 36 Cigarette-Equivalents   | 12-4<br>(7-77-18-2) |
| Aortic aneurysm                 | 30 to 34 | Male   | 48 Cigarette-Equivalents   | 14-5<br>(7-45-24-3) |
| Aortic aneurysm                 | 35 to 39 | Male   | 0 Cigarette-Equivalents    | 1-00<br>(1-00-1-00) |
| Aortic aneurysm                 | 35 to 39 | Male   | 12 Cigarette-Equivalents   | 5-05<br>(3-68-6-52) |
| Aortic aneurysm                 | 35 to 39 | Male   | 24 Cigarette-Equivalents   | 9-53<br>(6-98-12-5) |
| Aortic aneurysm                 | 35 to 39 | Male   | 36 Cigarette-Equivalents   | 12-4<br>(7-77-18-2) |
| Aortic aneurysm                 | 35 to 39 | Male   | 48 Cigarette-Equivalents   | 14-5<br>(7-45-24-3) |
| Aortic aneurysm                 | 35 to 39 | Female | 0 Cigarette-Equivalents    | 1-00<br>(1-00-1-00) |
| Aortic aneurysm                 | 35 to 39 | Female | 12 Cigarette-Equivalents   | 5-05<br>(3-68-6-52) |
| Aortic aneurysm                 | 35 to 39 | Female | 24 Cigarette-Equivalents   | 9-53<br>(6-98-12-5) |
| Aortic aneurysm                 | 35 to 39 | Female | 36 Cigarette-Equivalents   | 12-4<br>(7-77-18-2) |
| Aortic aneurysm                 | 35 to 39 | Female | 48 Cigarette-Equivalents   | 14-5<br>(7-45-24-3) |
| Aortic aneurysm                 | 40 to 44 | Female | 0 Cigarette-Equivalents    | 1-00<br>(1-00-1-00) |
| Aortic aneurysm                 | 40 to 44 | Female | 12 Cigarette-Equivalents   | 5-05<br>(3-68-6-52) |

|                 |          |        |                          |                     |
|-----------------|----------|--------|--------------------------|---------------------|
| Aortic aneurysm | 40 to 44 | Female | 24 Cigarette-Equivalents | 9.53<br>(6.98–12.5) |
| Aortic aneurysm | 40 to 44 | Female | 36 Cigarette-Equivalents | 12.4<br>(7.77–18.2) |
| Aortic aneurysm | 40 to 44 | Female | 48 Cigarette-Equivalents | 14.5<br>(7.45–24.3) |
| Aortic aneurysm | 40 to 44 | Male   | 0 Cigarette-Equivalents  | 1.00<br>(1.00–1.00) |
| Aortic aneurysm | 40 to 44 | Male   | 12 Cigarette-Equivalents | 5.05<br>(3.68–6.52) |
| Aortic aneurysm | 40 to 44 | Male   | 24 Cigarette-Equivalents | 9.53<br>(6.98–12.5) |
| Aortic aneurysm | 40 to 44 | Male   | 36 Cigarette-Equivalents | 12.4<br>(7.77–18.2) |
| Aortic aneurysm | 40 to 44 | Male   | 48 Cigarette-Equivalents | 14.5<br>(7.45–24.3) |
| Aortic aneurysm | 45 to 49 | Male   | 0 Cigarette-Equivalents  | 1.00<br>(1.00–1.00) |
| Aortic aneurysm | 45 to 49 | Male   | 12 Cigarette-Equivalents | 4.20<br>(3.21–5.30) |
| Aortic aneurysm | 45 to 49 | Male   | 24 Cigarette-Equivalents | 6.72<br>(5.10–8.60) |
| Aortic aneurysm | 45 to 49 | Male   | 36 Cigarette-Equivalents | 8.51<br>(5.66–11.9) |
| Aortic aneurysm | 45 to 49 | Male   | 48 Cigarette-Equivalents | 9.77<br>(5.93–15.1) |
| Aortic aneurysm | 45 to 49 | Female | 0 Cigarette-Equivalents  | 1.00<br>(1.00–1.00) |
| Aortic aneurysm | 45 to 49 | Female | 12 Cigarette-Equivalents | 4.20<br>(3.21–5.30) |
| Aortic aneurysm | 45 to 49 | Female | 24 Cigarette-Equivalents | 6.72<br>(5.10–8.60) |
| Aortic aneurysm | 45 to 49 | Female | 36 Cigarette-Equivalents | 8.51<br>(5.66–11.9) |
| Aortic aneurysm | 45 to 49 | Female | 48 Cigarette-Equivalents | 9.77<br>(5.93–15.1) |
| Aortic aneurysm | 50 to 54 | Female | 0 Cigarette-Equivalents  | 1.00<br>(1.00–1.00) |
| Aortic aneurysm | 50 to 54 | Female | 12 Cigarette-Equivalents | 4.20<br>(3.21–5.30) |
| Aortic aneurysm | 50 to 54 | Female | 24 Cigarette-Equivalents | 6.72<br>(5.10–8.60) |
| Aortic aneurysm | 50 to 54 | Female | 36 Cigarette-Equivalents | 8.51<br>(5.66–11.9) |
| Aortic aneurysm | 50 to 54 | Female | 48 Cigarette-Equivalents | 9.77<br>(5.93–15.1) |
| Aortic aneurysm | 50 to 54 | Male   | 0 Cigarette-Equivalents  | 1.00<br>(1.00–1.00) |
| Aortic aneurysm | 50 to 54 | Male   | 12 Cigarette-Equivalents | 4.20<br>(3.21–5.30) |
| Aortic aneurysm | 50 to 54 | Male   | 24 Cigarette-Equivalents | 6.72<br>(5.10–8.60) |
| Aortic aneurysm | 50 to 54 | Male   | 36 Cigarette-Equivalents | 8.51<br>(5.66–11.9) |

|                 |          |        |                          |                     |
|-----------------|----------|--------|--------------------------|---------------------|
| Aortic aneurysm | 50 to 54 | Male   | 48 Cigarette-Equivalents | 9.77<br>(5.93–15.1) |
| Aortic aneurysm | 55 to 59 | Male   | 0 Cigarette-Equivalents  | 1.00<br>(1.00–1.00) |
| Aortic aneurysm | 55 to 59 | Male   | 12 Cigarette-Equivalents | 3.40<br>(2.71–4.16) |
| Aortic aneurysm | 55 to 59 | Male   | 24 Cigarette-Equivalents | 4.62<br>(3.71–5.76) |
| Aortic aneurysm | 55 to 59 | Male   | 36 Cigarette-Equivalents | 5.63<br>(3.93–7.70) |
| Aortic aneurysm | 55 to 59 | Male   | 48 Cigarette-Equivalents | 6.26<br>(4.09–9.24) |
| Aortic aneurysm | 55 to 59 | Female | 0 Cigarette-Equivalents  | 1.00<br>(1.00–1.00) |
| Aortic aneurysm | 55 to 59 | Female | 12 Cigarette-Equivalents | 3.40<br>(2.71–4.16) |
| Aortic aneurysm | 55 to 59 | Female | 24 Cigarette-Equivalents | 4.62<br>(3.71–5.76) |
| Aortic aneurysm | 55 to 59 | Female | 36 Cigarette-Equivalents | 5.63<br>(3.93–7.70) |
| Aortic aneurysm | 55 to 59 | Female | 48 Cigarette-Equivalents | 6.26<br>(4.09–9.24) |
| Aortic aneurysm | 60 to 64 | Female | 0 Cigarette-Equivalents  | 1.00<br>(1.00–1.00) |
| Aortic aneurysm | 60 to 64 | Female | 12 Cigarette-Equivalents | 3.40<br>(2.71–4.16) |
| Aortic aneurysm | 60 to 64 | Female | 24 Cigarette-Equivalents | 4.62<br>(3.71–5.76) |
| Aortic aneurysm | 60 to 64 | Female | 36 Cigarette-Equivalents | 5.63<br>(3.93–7.70) |
| Aortic aneurysm | 60 to 64 | Female | 48 Cigarette-Equivalents | 6.26<br>(4.09–9.24) |
| Aortic aneurysm | 60 to 64 | Male   | 0 Cigarette-Equivalents  | 1.00<br>(1.00–1.00) |
| Aortic aneurysm | 60 to 64 | Male   | 12 Cigarette-Equivalents | 3.40<br>(2.71–4.16) |
| Aortic aneurysm | 60 to 64 | Male   | 24 Cigarette-Equivalents | 4.62<br>(3.71–5.76) |
| Aortic aneurysm | 60 to 64 | Male   | 36 Cigarette-Equivalents | 5.63<br>(3.93–7.70) |
| Aortic aneurysm | 60 to 64 | Male   | 48 Cigarette-Equivalents | 6.26<br>(4.09–9.24) |
| Aortic aneurysm | 65 to 69 | Male   | 0 Cigarette-Equivalents  | 1.00<br>(1.00–1.00) |
| Aortic aneurysm | 65 to 69 | Male   | 12 Cigarette-Equivalents | 2.67<br>(2.26–3.04) |
| Aortic aneurysm | 65 to 69 | Male   | 24 Cigarette-Equivalents | 3.12<br>(2.58–3.72) |
| Aortic aneurysm | 65 to 69 | Male   | 36 Cigarette-Equivalents | 3.70<br>(2.78–4.80) |
| Aortic aneurysm | 65 to 69 | Male   | 48 Cigarette-Equivalents | 3.95<br>(2.76–5.44) |
| Aortic aneurysm | 65 to 69 | Female | 0 Cigarette-Equivalents  | 1.00<br>(1.00–1.00) |

|                 |          |        |                          |                     |
|-----------------|----------|--------|--------------------------|---------------------|
| Aortic aneurysm | 65 to 69 | Female | 12 Cigarette-Equivalents | 2.67<br>(2.26–3.04) |
| Aortic aneurysm | 65 to 69 | Female | 24 Cigarette-Equivalents | 3.12<br>(2.58–3.72) |
| Aortic aneurysm | 65 to 69 | Female | 36 Cigarette-Equivalents | 3.70<br>(2.78–4.80) |
| Aortic aneurysm | 65 to 69 | Female | 48 Cigarette-Equivalents | 3.95<br>(2.76–5.44) |
| Aortic aneurysm | 70 to 74 | Female | 0 Cigarette-Equivalents  | 1.00<br>(1.00–1.00) |
| Aortic aneurysm | 70 to 74 | Female | 12 Cigarette-Equivalents | 2.67<br>(2.26–3.04) |
| Aortic aneurysm | 70 to 74 | Female | 24 Cigarette-Equivalents | 3.12<br>(2.58–3.72) |
| Aortic aneurysm | 70 to 74 | Female | 36 Cigarette-Equivalents | 3.70<br>(2.78–4.80) |
| Aortic aneurysm | 70 to 74 | Female | 48 Cigarette-Equivalents | 3.95<br>(2.76–5.44) |
| Aortic aneurysm | 70 to 74 | Male   | 0 Cigarette-Equivalents  | 1.00<br>(1.00–1.00) |
| Aortic aneurysm | 70 to 74 | Male   | 12 Cigarette-Equivalents | 2.67<br>(2.26–3.04) |
| Aortic aneurysm | 70 to 74 | Male   | 24 Cigarette-Equivalents | 3.12<br>(2.58–3.72) |
| Aortic aneurysm | 70 to 74 | Male   | 36 Cigarette-Equivalents | 3.70<br>(2.78–4.80) |
| Aortic aneurysm | 70 to 74 | Male   | 48 Cigarette-Equivalents | 3.95<br>(2.76–5.44) |
| Aortic aneurysm | 75 to 79 | Male   | 0 Cigarette-Equivalents  | 1.00<br>(1.00–1.00) |
| Aortic aneurysm | 75 to 79 | Male   | 12 Cigarette-Equivalents | 2.01<br>(1.79–2.24) |
| Aortic aneurysm | 75 to 79 | Male   | 24 Cigarette-Equivalents | 2.08<br>(1.80–2.40) |
| Aortic aneurysm | 75 to 79 | Male   | 36 Cigarette-Equivalents | 2.46<br>(1.90–3.04) |
| Aortic aneurysm | 75 to 79 | Male   | 48 Cigarette-Equivalents | 2.50<br>(1.88–3.30) |
| Aortic aneurysm | 75 to 79 | Female | 0 Cigarette-Equivalents  | 1.00<br>(1.00–1.00) |
| Aortic aneurysm | 75 to 79 | Female | 12 Cigarette-Equivalents | 2.01<br>(1.79–2.24) |
| Aortic aneurysm | 75 to 79 | Female | 24 Cigarette-Equivalents | 2.08<br>(1.80–2.40) |
| Aortic aneurysm | 75 to 79 | Female | 36 Cigarette-Equivalents | 2.46<br>(1.90–3.04) |
| Aortic aneurysm | 75 to 79 | Female | 48 Cigarette-Equivalents | 2.50<br>(1.88–3.30) |
| Aortic aneurysm | 80 to 84 | Female | 0 Cigarette-Equivalents  | 1.00<br>(1.00–1.00) |
| Aortic aneurysm | 80 to 84 | Female | 12 Cigarette-Equivalents | 2.01<br>(1.79–2.24) |
| Aortic aneurysm | 80 to 84 | Female | 24 Cigarette-Equivalents | 2.08<br>(1.80–2.40) |



|                 |          |        |                          |                     |
|-----------------|----------|--------|--------------------------|---------------------|
| Aortic aneurysm | 80 to 84 | Female | 36 Cigarette-Equivalents | 2:46<br>(1:90-3:04) |
| Aortic aneurysm | 80 to 84 | Female | 48 Cigarette-Equivalents | 2:50<br>(1:88-3:30) |
| Aortic aneurysm | 80 to 84 | Male   | 0 Cigarette-Equivalents  | 1:00<br>(1:00-1:00) |
| Aortic aneurysm | 80 to 84 | Male   | 12 Cigarette-Equivalents | 2:01<br>(1:79-2:24) |
| Aortic aneurysm | 80 to 84 | Male   | 24 Cigarette-Equivalents | 2:08<br>(1:80-2:40) |
| Aortic aneurysm | 80 to 84 | Male   | 36 Cigarette-Equivalents | 2:46<br>(1:90-3:04) |
| Aortic aneurysm | 80 to 84 | Male   | 48 Cigarette-Equivalents | 2:50<br>(1:88-3:30) |
| Aortic aneurysm | 85 to 89 | Male   | 0 Cigarette-Equivalents  | 1:00<br>(1:00-1:00) |
| Aortic aneurysm | 85 to 89 | Male   | 12 Cigarette-Equivalents | 1:44<br>(1:33-1:56) |
| Aortic aneurysm | 85 to 89 | Male   | 24 Cigarette-Equivalents | 1:39<br>(1:24-1:55) |
| Aortic aneurysm | 85 to 89 | Male   | 36 Cigarette-Equivalents | 1:59<br>(1:31-1:88) |
| Aortic aneurysm | 85 to 89 | Male   | 48 Cigarette-Equivalents | 1:56<br>(1:22-1:95) |
| Aortic aneurysm | 85 to 89 | Female | 0 Cigarette-Equivalents  | 1:00<br>(1:00-1:00) |
| Aortic aneurysm | 85 to 89 | Female | 12 Cigarette-Equivalents | 1:44<br>(1:33-1:56) |
| Aortic aneurysm | 85 to 89 | Female | 24 Cigarette-Equivalents | 1:39<br>(1:24-1:55) |
| Aortic aneurysm | 85 to 89 | Female | 36 Cigarette-Equivalents | 1:59<br>(1:31-1:88) |
| Aortic aneurysm | 85 to 89 | Female | 48 Cigarette-Equivalents | 1:56<br>(1:22-1:95) |
| Aortic aneurysm | 90 to 94 | Female | 0 Cigarette-Equivalents  | 1:00<br>(1:00-1:00) |
| Aortic aneurysm | 90 to 94 | Female | 12 Cigarette-Equivalents | 1:44<br>(1:33-1:56) |
| Aortic aneurysm | 90 to 94 | Female | 24 Cigarette-Equivalents | 1:39<br>(1:24-1:55) |
| Aortic aneurysm | 90 to 94 | Female | 36 Cigarette-Equivalents | 1:59<br>(1:31-1:88) |
| Aortic aneurysm | 90 to 94 | Female | 48 Cigarette-Equivalents | 1:56<br>(1:22-1:95) |
| Aortic aneurysm | 90 to 94 | Male   | 0 Cigarette-Equivalents  | 1:00<br>(1:00-1:00) |
| Aortic aneurysm | 90 to 94 | Male   | 12 Cigarette-Equivalents | 1:44<br>(1:33-1:56) |
| Aortic aneurysm | 90 to 94 | Male   | 24 Cigarette-Equivalents | 1:39<br>(1:24-1:55) |
| Aortic aneurysm | 90 to 94 | Male   | 36 Cigarette-Equivalents | 1:59<br>(1:31-1:88) |
| Aortic aneurysm | 90 to 94 | Male   | 48 Cigarette-Equivalents | 1:56<br>(1:22-1:95) |

|                                             |          |        |                            |                     |
|---------------------------------------------|----------|--------|----------------------------|---------------------|
| Aortic aneurysm                             | 95 plus  | Male   | 0 Cigarette-Equivalents    | 1-00<br>(1-00-1-00) |
| Aortic aneurysm                             | 95 plus  | Male   | 12 Cigarette-Equivalents   | 1-01<br>(1-00-1-03) |
| Aortic aneurysm                             | 95 plus  | Male   | 24 Cigarette-Equivalents   | 1-00<br>(1-00-1-02) |
| Aortic aneurysm                             | 95 plus  | Male   | 36 Cigarette-Equivalents   | 1-01<br>(1-00-1-03) |
| Aortic aneurysm                             | 95 plus  | Male   | 48 Cigarette-Equivalents   | 1-03<br>(1-00-1-16) |
| Aortic aneurysm                             | 95 plus  | Female | 0 Cigarette-Equivalents    | 1-00<br>(1-00-1-00) |
| Aortic aneurysm                             | 95 plus  | Female | 12 Cigarette-Equivalents   | 1-01<br>(1-00-1-03) |
| Aortic aneurysm                             | 95 plus  | Female | 24 Cigarette-Equivalents   | 1-00<br>(1-00-1-02) |
| Aortic aneurysm                             | 95 plus  | Female | 36 Cigarette-Equivalents   | 1-01<br>(1-00-1-03) |
| Aortic aneurysm                             | 95 plus  | Female | 48 Cigarette-Equivalents   | 1-03<br>(1-00-1-16) |
| Lower extremity peripheral arterial disease | 30 to 34 | Female | 0 Cigarette-Equivalents    | 1-00<br>(1-00-1-00) |
| Lower extremity peripheral arterial disease | 30 to 34 | Female | 9.3 Cigarette-Equivalents  | 3-03<br>(1-98-4-60) |
| Lower extremity peripheral arterial disease | 30 to 34 | Female | 18.6 Cigarette-Equivalents | 6-37<br>(3-69-10-3) |
| Lower extremity peripheral arterial disease | 30 to 34 | Female | 27.9 Cigarette-Equivalents | 9-00<br>(4-62-15-9) |
| Lower extremity peripheral arterial disease | 30 to 34 | Female | 37.2 Cigarette-Equivalents | 10-8<br>(4-70-21-0) |
| Lower extremity peripheral arterial disease | 30 to 34 | Female | 46.5 Cigarette-Equivalents | 12-0<br>(4-66-25-3) |
| Lower extremity peripheral arterial disease | 30 to 34 | Male   | 0 Cigarette-Equivalents    | 1-00<br>(1-00-1-00) |
| Lower extremity peripheral arterial disease | 30 to 34 | Male   | 9.3 Cigarette-Equivalents  | 3-03<br>(1-98-4-60) |
| Lower extremity peripheral arterial disease | 30 to 34 | Male   | 18.6 Cigarette-Equivalents | 6-37<br>(3-69-10-3) |
| Lower extremity peripheral arterial disease | 30 to 34 | Male   | 27.9 Cigarette-Equivalents | 9-00<br>(4-62-15-9) |
| Lower extremity peripheral arterial disease | 30 to 34 | Male   | 37.2 Cigarette-Equivalents | 10-8<br>(4-70-21-0) |
| Lower extremity peripheral arterial disease | 30 to 34 | Male   | 46.5 Cigarette-Equivalents | 12-0<br>(4-66-25-3) |
| Lower extremity peripheral arterial disease | 35 to 39 | Male   | 0 Cigarette-Equivalents    | 1-00<br>(1-00-1-00) |
| Lower extremity peripheral arterial disease | 35 to 39 | Male   | 9.3 Cigarette-Equivalents  | 3-03<br>(1-98-4-60) |
| Lower extremity peripheral arterial disease | 35 to 39 | Male   | 18.6 Cigarette-Equivalents | 6-37<br>(3-69-10-3) |
| Lower extremity peripheral arterial disease | 35 to 39 | Male   | 27.9 Cigarette-Equivalents | 9-00<br>(4-62-15-9) |
| Lower extremity peripheral arterial disease | 35 to 39 | Male   | 37.2 Cigarette-Equivalents | 10-8<br>(4-70-21-0) |

|                                             |          |        |                            |                     |
|---------------------------------------------|----------|--------|----------------------------|---------------------|
| Lower extremity peripheral arterial disease | 35 to 39 | Male   | 46.5 Cigarette-Equivalents | 12.0<br>(4.66–25.3) |
| Lower extremity peripheral arterial disease | 35 to 39 | Female | 0 Cigarette-Equivalents    | 1.00<br>(1.00–1.00) |
| Lower extremity peripheral arterial disease | 35 to 39 | Female | 9.3 Cigarette-Equivalents  | 3.03<br>(1.98–4.60) |
| Lower extremity peripheral arterial disease | 35 to 39 | Female | 18.6 Cigarette-Equivalents | 6.37<br>(3.69–10.3) |
| Lower extremity peripheral arterial disease | 35 to 39 | Female | 27.9 Cigarette-Equivalents | 9.00<br>(4.62–15.9) |
| Lower extremity peripheral arterial disease | 35 to 39 | Female | 37.2 Cigarette-Equivalents | 10.8<br>(4.70–21.0) |
| Lower extremity peripheral arterial disease | 35 to 39 | Female | 46.5 Cigarette-Equivalents | 12.0<br>(4.66–25.3) |
| Lower extremity peripheral arterial disease | 40 to 44 | Female | 0 Cigarette-Equivalents    | 1.00<br>(1.00–1.00) |
| Lower extremity peripheral arterial disease | 40 to 44 | Female | 9.3 Cigarette-Equivalents  | 3.03<br>(1.98–4.60) |
| Lower extremity peripheral arterial disease | 40 to 44 | Female | 18.6 Cigarette-Equivalents | 6.37<br>(3.69–10.3) |
| Lower extremity peripheral arterial disease | 40 to 44 | Female | 27.9 Cigarette-Equivalents | 9.00<br>(4.62–15.9) |
| Lower extremity peripheral arterial disease | 40 to 44 | Female | 37.2 Cigarette-Equivalents | 10.8<br>(4.70–21.0) |
| Lower extremity peripheral arterial disease | 40 to 44 | Female | 46.5 Cigarette-Equivalents | 12.0<br>(4.66–25.3) |
| Lower extremity peripheral arterial disease | 40 to 44 | Male   | 0 Cigarette-Equivalents    | 1.00<br>(1.00–1.00) |
| Lower extremity peripheral arterial disease | 40 to 44 | Male   | 9.3 Cigarette-Equivalents  | 3.03<br>(1.98–4.60) |
| Lower extremity peripheral arterial disease | 40 to 44 | Male   | 18.6 Cigarette-Equivalents | 6.37<br>(3.69–10.3) |
| Lower extremity peripheral arterial disease | 40 to 44 | Male   | 27.9 Cigarette-Equivalents | 9.00<br>(4.62–15.9) |
| Lower extremity peripheral arterial disease | 40 to 44 | Male   | 37.2 Cigarette-Equivalents | 10.8<br>(4.70–21.0) |
| Lower extremity peripheral arterial disease | 40 to 44 | Male   | 46.5 Cigarette-Equivalents | 12.0<br>(4.66–25.3) |
| Lower extremity peripheral arterial disease | 45 to 49 | Male   | 0 Cigarette-Equivalents    | 1.00<br>(1.00–1.00) |
| Lower extremity peripheral arterial disease | 45 to 49 | Male   | 9.3 Cigarette-Equivalents  | 2.78<br>(1.76–4.24) |
| Lower extremity peripheral arterial disease | 45 to 49 | Male   | 18.6 Cigarette-Equivalents | 5.44<br>(3.03–8.94) |
| Lower extremity peripheral arterial disease | 45 to 49 | Male   | 27.9 Cigarette-Equivalents | 7.43<br>(3.68–13.2) |
| Lower extremity peripheral arterial disease | 45 to 49 | Male   | 37.2 Cigarette-Equivalents | 8.84<br>(3.84–18.1) |
| Lower extremity peripheral arterial disease | 45 to 49 | Male   | 46.5 Cigarette-Equivalents | 9.78<br>(3.82–21.0) |
| Lower extremity peripheral arterial disease | 45 to 49 | Female | 0 Cigarette-Equivalents    | 1.00<br>(1.00–1.00) |
| Lower extremity peripheral arterial disease | 45 to 49 | Female | 9.3 Cigarette-Equivalents  | 2.78<br>(1.76–4.24) |

|                                             |          |        |                            |                     |
|---------------------------------------------|----------|--------|----------------------------|---------------------|
| Lower extremity peripheral arterial disease | 45 to 49 | Female | 18.6 Cigarette-Equivalents | 5.44<br>(3.03–8.94) |
| Lower extremity peripheral arterial disease | 45 to 49 | Female | 27.9 Cigarette-Equivalents | 7.43<br>(3.68–13.2) |
| Lower extremity peripheral arterial disease | 45 to 49 | Female | 37.2 Cigarette-Equivalents | 8.84<br>(3.84–18.1) |
| Lower extremity peripheral arterial disease | 45 to 49 | Female | 46.5 Cigarette-Equivalents | 9.78<br>(3.82–21.0) |
| Lower extremity peripheral arterial disease | 50 to 54 | Female | 0 Cigarette-Equivalents    | 1.00<br>(1.00–1.00) |
| Lower extremity peripheral arterial disease | 50 to 54 | Female | 9.3 Cigarette-Equivalents  | 2.78<br>(1.76–4.24) |
| Lower extremity peripheral arterial disease | 50 to 54 | Female | 18.6 Cigarette-Equivalents | 5.44<br>(3.03–8.94) |
| Lower extremity peripheral arterial disease | 50 to 54 | Female | 27.9 Cigarette-Equivalents | 7.43<br>(3.68–13.2) |
| Lower extremity peripheral arterial disease | 50 to 54 | Female | 37.2 Cigarette-Equivalents | 8.84<br>(3.84–18.1) |
| Lower extremity peripheral arterial disease | 50 to 54 | Female | 46.5 Cigarette-Equivalents | 9.78<br>(3.82–21.0) |
| Lower extremity peripheral arterial disease | 50 to 54 | Male   | 0 Cigarette-Equivalents    | 1.00<br>(1.00–1.00) |
| Lower extremity peripheral arterial disease | 50 to 54 | Male   | 9.3 Cigarette-Equivalents  | 2.78<br>(1.76–4.24) |
| Lower extremity peripheral arterial disease | 50 to 54 | Male   | 18.6 Cigarette-Equivalents | 5.44<br>(3.03–8.94) |
| Lower extremity peripheral arterial disease | 50 to 54 | Male   | 27.9 Cigarette-Equivalents | 7.43<br>(3.68–13.2) |
| Lower extremity peripheral arterial disease | 50 to 54 | Male   | 37.2 Cigarette-Equivalents | 8.84<br>(3.84–18.1) |
| Lower extremity peripheral arterial disease | 50 to 54 | Male   | 46.5 Cigarette-Equivalents | 9.78<br>(3.82–21.0) |
| Lower extremity peripheral arterial disease | 55 to 59 | Male   | 0 Cigarette-Equivalents    | 1.00<br>(1.00–1.00) |
| Lower extremity peripheral arterial disease | 55 to 59 | Male   | 9.3 Cigarette-Equivalents  | 3.08<br>(1.72–4.74) |
| Lower extremity peripheral arterial disease | 55 to 59 | Male   | 18.6 Cigarette-Equivalents | 5.69<br>(2.72–8.82) |
| Lower extremity peripheral arterial disease | 55 to 59 | Male   | 27.9 Cigarette-Equivalents | 7.07<br>(3.10–11.2) |
| Lower extremity peripheral arterial disease | 55 to 59 | Male   | 37.2 Cigarette-Equivalents | 8.20<br>(3.61–14.7) |
| Lower extremity peripheral arterial disease | 55 to 59 | Male   | 46.5 Cigarette-Equivalents | 9.03<br>(3.61–19.0) |
| Lower extremity peripheral arterial disease | 55 to 59 | Female | 0 Cigarette-Equivalents    | 1.00<br>(1.00–1.00) |
| Lower extremity peripheral arterial disease | 55 to 59 | Female | 9.3 Cigarette-Equivalents  | 3.08<br>(1.72–4.74) |
| Lower extremity peripheral arterial disease | 55 to 59 | Female | 18.6 Cigarette-Equivalents | 5.69<br>(2.72–8.82) |
| Lower extremity peripheral arterial disease | 55 to 59 | Female | 27.9 Cigarette-Equivalents | 7.07<br>(3.10–11.2) |
| Lower extremity peripheral arterial disease | 55 to 59 | Female | 37.2 Cigarette-Equivalents | 8.20<br>(3.61–14.7) |

|                                             |          |        |                            |                     |
|---------------------------------------------|----------|--------|----------------------------|---------------------|
| Lower extremity peripheral arterial disease | 55 to 59 | Female | 46.5 Cigarette-Equivalents | 9.03<br>(3.61-19.0) |
| Lower extremity peripheral arterial disease | 60 to 64 | Female | 0 Cigarette-Equivalents    | 1.00<br>(1.00-1.00) |
| Lower extremity peripheral arterial disease | 60 to 64 | Female | 9.3 Cigarette-Equivalents  | 3.08<br>(1.72-4.74) |
| Lower extremity peripheral arterial disease | 60 to 64 | Female | 18.6 Cigarette-Equivalents | 5.69<br>(2.72-8.82) |
| Lower extremity peripheral arterial disease | 60 to 64 | Female | 27.9 Cigarette-Equivalents | 7.07<br>(3.10-11.2) |
| Lower extremity peripheral arterial disease | 60 to 64 | Female | 37.2 Cigarette-Equivalents | 8.20<br>(3.61-14.7) |
| Lower extremity peripheral arterial disease | 60 to 64 | Female | 46.5 Cigarette-Equivalents | 9.03<br>(3.61-19.0) |
| Lower extremity peripheral arterial disease | 60 to 64 | Male   | 0 Cigarette-Equivalents    | 1.00<br>(1.00-1.00) |
| Lower extremity peripheral arterial disease | 60 to 64 | Male   | 9.3 Cigarette-Equivalents  | 3.08<br>(1.72-4.74) |
| Lower extremity peripheral arterial disease | 60 to 64 | Male   | 18.6 Cigarette-Equivalents | 5.69<br>(2.72-8.82) |
| Lower extremity peripheral arterial disease | 60 to 64 | Male   | 27.9 Cigarette-Equivalents | 7.07<br>(3.10-11.2) |
| Lower extremity peripheral arterial disease | 60 to 64 | Male   | 37.2 Cigarette-Equivalents | 8.20<br>(3.61-14.7) |
| Lower extremity peripheral arterial disease | 60 to 64 | Male   | 46.5 Cigarette-Equivalents | 9.03<br>(3.61-19.0) |
| Lower extremity peripheral arterial disease | 65 to 69 | Male   | 0 Cigarette-Equivalents    | 1.00<br>(1.00-1.00) |
| Lower extremity peripheral arterial disease | 65 to 69 | Male   | 9.3 Cigarette-Equivalents  | 2.98<br>(2.18-3.75) |
| Lower extremity peripheral arterial disease | 65 to 69 | Male   | 18.6 Cigarette-Equivalents | 4.87<br>(3.56-6.08) |
| Lower extremity peripheral arterial disease | 65 to 69 | Male   | 27.9 Cigarette-Equivalents | 5.12<br>(3.76-6.66) |
| Lower extremity peripheral arterial disease | 65 to 69 | Male   | 37.2 Cigarette-Equivalents | 5.97<br>(3.76-9.09) |
| Lower extremity peripheral arterial disease | 65 to 69 | Male   | 46.5 Cigarette-Equivalents | 6.53<br>(3.54-11.1) |
| Lower extremity peripheral arterial disease | 65 to 69 | Female | 0 Cigarette-Equivalents    | 1.00<br>(1.00-1.00) |
| Lower extremity peripheral arterial disease | 65 to 69 | Female | 9.3 Cigarette-Equivalents  | 2.98<br>(2.18-3.75) |
| Lower extremity peripheral arterial disease | 65 to 69 | Female | 18.6 Cigarette-Equivalents | 4.87<br>(3.56-6.08) |
| Lower extremity peripheral arterial disease | 65 to 69 | Female | 27.9 Cigarette-Equivalents | 5.12<br>(3.76-6.66) |
| Lower extremity peripheral arterial disease | 65 to 69 | Female | 37.2 Cigarette-Equivalents | 5.97<br>(3.76-9.09) |
| Lower extremity peripheral arterial disease | 65 to 69 | Female | 46.5 Cigarette-Equivalents | 6.53<br>(3.54-11.1) |
| Lower extremity peripheral arterial disease | 70 to 74 | Female | 0 Cigarette-Equivalents    | 1.00<br>(1.00-1.00) |
| Lower extremity peripheral arterial disease | 70 to 74 | Female | 9.3 Cigarette-Equivalents  | 2.98<br>(2.18-3.75) |

|                                             |          |        |                            |                     |
|---------------------------------------------|----------|--------|----------------------------|---------------------|
| Lower extremity peripheral arterial disease | 70 to 74 | Female | 18.6 Cigarette-Equivalents | 4.87<br>(3.56–6.08) |
| Lower extremity peripheral arterial disease | 70 to 74 | Female | 27.9 Cigarette-Equivalents | 5.12<br>(3.76–6.66) |
| Lower extremity peripheral arterial disease | 70 to 74 | Female | 37.2 Cigarette-Equivalents | 5.97<br>(3.76–9.09) |
| Lower extremity peripheral arterial disease | 70 to 74 | Female | 46.5 Cigarette-Equivalents | 6.53<br>(3.54–11.1) |
| Lower extremity peripheral arterial disease | 70 to 74 | Male   | 0 Cigarette-Equivalents    | 1.00<br>(1.00–1.00) |
| Lower extremity peripheral arterial disease | 70 to 74 | Male   | 9.3 Cigarette-Equivalents  | 2.98<br>(2.18–3.75) |
| Lower extremity peripheral arterial disease | 70 to 74 | Male   | 18.6 Cigarette-Equivalents | 4.87<br>(3.56–6.08) |
| Lower extremity peripheral arterial disease | 70 to 74 | Male   | 27.9 Cigarette-Equivalents | 5.12<br>(3.76–6.66) |
| Lower extremity peripheral arterial disease | 70 to 74 | Male   | 37.2 Cigarette-Equivalents | 5.97<br>(3.76–9.09) |
| Lower extremity peripheral arterial disease | 70 to 74 | Male   | 46.5 Cigarette-Equivalents | 6.53<br>(3.54–11.1) |
| Lower extremity peripheral arterial disease | 75 to 79 | Male   | 0 Cigarette-Equivalents    | 1.00<br>(1.00–1.00) |
| Lower extremity peripheral arterial disease | 75 to 79 | Male   | 9.3 Cigarette-Equivalents  | 2.19<br>(1.72–2.64) |
| Lower extremity peripheral arterial disease | 75 to 79 | Male   | 18.6 Cigarette-Equivalents | 3.01<br>(2.44–3.56) |
| Lower extremity peripheral arterial disease | 75 to 79 | Male   | 27.9 Cigarette-Equivalents | 2.89<br>(2.24–3.71) |
| Lower extremity peripheral arterial disease | 75 to 79 | Male   | 37.2 Cigarette-Equivalents | 3.34<br>(2.18–4.95) |
| Lower extremity peripheral arterial disease | 75 to 79 | Male   | 46.5 Cigarette-Equivalents | 3.63<br>(1.99–6.14) |
| Lower extremity peripheral arterial disease | 75 to 79 | Female | 0 Cigarette-Equivalents    | 1.00<br>(1.00–1.00) |
| Lower extremity peripheral arterial disease | 75 to 79 | Female | 9.3 Cigarette-Equivalents  | 2.19<br>(1.72–2.64) |
| Lower extremity peripheral arterial disease | 75 to 79 | Female | 18.6 Cigarette-Equivalents | 3.01<br>(2.44–3.56) |
| Lower extremity peripheral arterial disease | 75 to 79 | Female | 27.9 Cigarette-Equivalents | 2.89<br>(2.24–3.71) |
| Lower extremity peripheral arterial disease | 75 to 79 | Female | 37.2 Cigarette-Equivalents | 3.34<br>(2.18–4.95) |
| Lower extremity peripheral arterial disease | 75 to 79 | Female | 46.5 Cigarette-Equivalents | 3.63<br>(1.99–6.14) |
| Lower extremity peripheral arterial disease | 80 to 84 | Female | 0 Cigarette-Equivalents    | 1.00<br>(1.00–1.00) |
| Lower extremity peripheral arterial disease | 80 to 84 | Female | 9.3 Cigarette-Equivalents  | 2.19<br>(1.72–2.64) |
| Lower extremity peripheral arterial disease | 80 to 84 | Female | 18.6 Cigarette-Equivalents | 3.01<br>(2.44–3.56) |
| Lower extremity peripheral arterial disease | 80 to 84 | Female | 27.9 Cigarette-Equivalents | 2.89<br>(2.24–3.71) |
| Lower extremity peripheral arterial disease | 80 to 84 | Female | 37.2 Cigarette-Equivalents | 3.34<br>(2.18–4.95) |

|                                             |          |        |                            |                     |
|---------------------------------------------|----------|--------|----------------------------|---------------------|
| Lower extremity peripheral arterial disease | 80 to 84 | Female | 46.5 Cigarette-Equivalents | 3.63<br>(1.99–6.14) |
| Lower extremity peripheral arterial disease | 80 to 84 | Male   | 0 Cigarette-Equivalents    | 1.00<br>(1.00–1.00) |
| Lower extremity peripheral arterial disease | 80 to 84 | Male   | 9.3 Cigarette-Equivalents  | 2.19<br>(1.72–2.64) |
| Lower extremity peripheral arterial disease | 80 to 84 | Male   | 18.6 Cigarette-Equivalents | 3.01<br>(2.44–3.56) |
| Lower extremity peripheral arterial disease | 80 to 84 | Male   | 27.9 Cigarette-Equivalents | 2.89<br>(2.24–3.71) |
| Lower extremity peripheral arterial disease | 80 to 84 | Male   | 37.2 Cigarette-Equivalents | 3.34<br>(2.18–4.95) |
| Lower extremity peripheral arterial disease | 80 to 84 | Male   | 46.5 Cigarette-Equivalents | 3.63<br>(1.99–6.14) |
| Lower extremity peripheral arterial disease | 85 to 89 | Male   | 0 Cigarette-Equivalents    | 1.00<br>(1.00–1.00) |
| Lower extremity peripheral arterial disease | 85 to 89 | Male   | 9.3 Cigarette-Equivalents  | 1.54<br>(1.24–1.83) |
| Lower extremity peripheral arterial disease | 85 to 89 | Male   | 18.6 Cigarette-Equivalents | 1.75<br>(1.45–2.08) |
| Lower extremity peripheral arterial disease | 85 to 89 | Male   | 27.9 Cigarette-Equivalents | 1.65<br>(1.30–2.06) |
| Lower extremity peripheral arterial disease | 85 to 89 | Male   | 37.2 Cigarette-Equivalents | 1.89<br>(1.25–2.83) |
| Lower extremity peripheral arterial disease | 85 to 89 | Male   | 46.5 Cigarette-Equivalents | 2.06<br>(1.12–3.54) |
| Lower extremity peripheral arterial disease | 85 to 89 | Female | 0 Cigarette-Equivalents    | 1.00<br>(1.00–1.00) |
| Lower extremity peripheral arterial disease | 85 to 89 | Female | 9.3 Cigarette-Equivalents  | 1.54<br>(1.24–1.83) |
| Lower extremity peripheral arterial disease | 85 to 89 | Female | 18.6 Cigarette-Equivalents | 1.75<br>(1.45–2.08) |
| Lower extremity peripheral arterial disease | 85 to 89 | Female | 27.9 Cigarette-Equivalents | 1.65<br>(1.30–2.06) |
| Lower extremity peripheral arterial disease | 85 to 89 | Female | 37.2 Cigarette-Equivalents | 1.89<br>(1.25–2.83) |
| Lower extremity peripheral arterial disease | 85 to 89 | Female | 46.5 Cigarette-Equivalents | 2.06<br>(1.12–3.54) |
| Lower extremity peripheral arterial disease | 90 to 94 | Female | 0 Cigarette-Equivalents    | 1.00<br>(1.00–1.00) |
| Lower extremity peripheral arterial disease | 90 to 94 | Female | 9.3 Cigarette-Equivalents  | 1.54<br>(1.24–1.83) |
| Lower extremity peripheral arterial disease | 90 to 94 | Female | 18.6 Cigarette-Equivalents | 1.75<br>(1.45–2.08) |
| Lower extremity peripheral arterial disease | 90 to 94 | Female | 27.9 Cigarette-Equivalents | 1.65<br>(1.30–2.06) |
| Lower extremity peripheral arterial disease | 90 to 94 | Female | 37.2 Cigarette-Equivalents | 1.89<br>(1.25–2.83) |
| Lower extremity peripheral arterial disease | 90 to 94 | Female | 46.5 Cigarette-Equivalents | 2.06<br>(1.12–3.54) |
| Lower extremity peripheral arterial disease | 90 to 94 | Male   | 0 Cigarette-Equivalents    | 1.00<br>(1.00–1.00) |
| Lower extremity peripheral arterial disease | 90 to 94 | Male   | 9.3 Cigarette-Equivalents  | 1.54<br>(1.24–1.83) |

|                                             |          |        |                            |                     |
|---------------------------------------------|----------|--------|----------------------------|---------------------|
| Lower extremity peripheral arterial disease | 90 to 94 | Male   | 18.6 Cigarette-Equivalents | 1.75<br>(1.45–2.08) |
| Lower extremity peripheral arterial disease | 90 to 94 | Male   | 27.9 Cigarette-Equivalents | 1.65<br>(1.30–2.06) |
| Lower extremity peripheral arterial disease | 90 to 94 | Male   | 37.2 Cigarette-Equivalents | 1.89<br>(1.25–2.83) |
| Lower extremity peripheral arterial disease | 90 to 94 | Male   | 46.5 Cigarette-Equivalents | 2.06<br>(1.12–3.54) |
| Lower extremity peripheral arterial disease | 95 plus  | Male   | 0 Cigarette-Equivalents    | 1.00<br>(1.00–1.00) |
| Lower extremity peripheral arterial disease | 95 plus  | Male   | 9.3 Cigarette-Equivalents  | 1.04<br>(1.00–1.18) |
| Lower extremity peripheral arterial disease | 95 plus  | Male   | 18.6 Cigarette-Equivalents | 1.03<br>(1.00–1.17) |
| Lower extremity peripheral arterial disease | 95 plus  | Male   | 27.9 Cigarette-Equivalents | 1.05<br>(1.00–1.22) |
| Lower extremity peripheral arterial disease | 95 plus  | Male   | 37.2 Cigarette-Equivalents | 1.16<br>(1.00–1.68) |
| Lower extremity peripheral arterial disease | 95 plus  | Male   | 46.5 Cigarette-Equivalents | 1.25<br>(1.00–2.04) |
| Lower extremity peripheral arterial disease | 95 plus  | Female | 0 Cigarette-Equivalents    | 1.00<br>(1.00–1.00) |
| Lower extremity peripheral arterial disease | 95 plus  | Female | 9.3 Cigarette-Equivalents  | 1.04<br>(1.00–1.18) |
| Lower extremity peripheral arterial disease | 95 plus  | Female | 18.6 Cigarette-Equivalents | 1.03<br>(1.00–1.17) |
| Lower extremity peripheral arterial disease | 95 plus  | Female | 27.9 Cigarette-Equivalents | 1.05<br>(1.00–1.22) |
| Lower extremity peripheral arterial disease | 95 plus  | Female | 37.2 Cigarette-Equivalents | 1.16<br>(1.00–1.68) |
| Lower extremity peripheral arterial disease | 95 plus  | Female | 46.5 Cigarette-Equivalents | 1.25<br>(1.00–2.04) |
| Chronic obstructive pulmonary disease       | All Ages | Both   | 0 Pack-Years               | 1.00<br>(1.00–1.00) |
| Chronic obstructive pulmonary disease       | All Ages | Both   | 10 Pack-Years              | 3.56<br>(2.63–4.56) |
| Chronic obstructive pulmonary disease       | All Ages | Both   | 20 Pack-Years              | 5.79<br>(4.36–7.36) |
| Chronic obstructive pulmonary disease       | All Ages | Both   | 45 Pack-Years              | 7.86<br>(6.28–9.84) |
| Chronic obstructive pulmonary disease       | All Ages | Both   | 60 Pack-Years              | 8.01<br>(4.24–12.7) |
| Chronic obstructive pulmonary disease       | All Ages | Both   | 75 Pack-Years              | 10.1<br>(6.09–15.3) |
| Chronic obstructive pulmonary disease       | All Ages | Both   | 90 Pack-Years              | 13.2<br>(7.98–20.7) |
| Asthma                                      | All Ages | Both   | 0 Cigarette-Equivalents    | 1.00<br>(1.00–1.00) |
| Asthma                                      | All Ages | Both   | 2.5 Cigarette-Equivalents  | 1.24<br>(1.00–1.52) |
| Asthma                                      | All Ages | Both   | 7.5 Cigarette-Equivalents  | 1.66<br>(1.19–2.18) |
| Asthma                                      | All Ages | Both   | 15 Cigarette-Equivalents   | 1.86<br>(1.32–2.40) |



|                                         |          |      |                            |                        |
|-----------------------------------------|----------|------|----------------------------|------------------------|
| Asthma                                  | All Ages | Both | 22.5 Cigarette-Equivalents | 1.99<br>(1.37–2.87)    |
| Asthma                                  | All Ages | Both | 30 Cigarette-Equivalents   | 2.37<br>(1.45–3.85)    |
| Peptic ulcer disease                    | All Ages | Both | 0 Cigarette-Equivalents    | 1.00<br>(1.00–1.00)    |
| Peptic ulcer disease                    | All Ages | Both | 6.5 Cigarette-Equivalents  | 1.82<br>(1.46–2.20)    |
| Peptic ulcer disease                    | All Ages | Both | 13 Cigarette-Equivalents   | 2.16<br>(1.76–2.57)    |
| Peptic ulcer disease                    | All Ages | Both | 19.5 Cigarette-Equivalents | 2.52<br>(2.07–2.99)    |
| Peptic ulcer disease                    | All Ages | Both | 26 Cigarette-Equivalents   | 2.55<br>(1.95–3.26)    |
| Peptic ulcer disease                    | All Ages | Both | 32.5 Cigarette-Equivalents | 2.89<br>(2.15–3.74)    |
| Gallbladder and biliary diseases        | All Ages | Both | 0 Cigarette-Equivalents    | 1.00<br>(1.00–1.00)    |
| Gallbladder and biliary diseases        | All Ages | Both | 8.8 Cigarette-Equivalents  | 1.36<br>(1.20–1.53)    |
| Gallbladder and biliary diseases        | All Ages | Both | 17.5 Cigarette-Equivalents | 1.30<br>(1.18–1.43)    |
| Gallbladder and biliary diseases        | All Ages | Both | 26.2 Cigarette-Equivalents | 1.40<br>(1.24–1.56)    |
| Gallbladder and biliary diseases        | All Ages | Both | 35 Cigarette-Equivalents   | 1.61<br>(1.30–1.96)    |
| Gallbladder and biliary diseases        | All Ages | Both | 43.8 Cigarette-Equivalents | 1.81<br>(1.45–2.16)    |
| Alzheimer's disease and other dementias | All Ages | Both | 0 Cigarette-Equivalents    | 1.00<br>(1.00–1.00)    |
| Alzheimer's disease and other dementias | All Ages | Both | 12 Cigarette-Equivalents   | 2.08<br>(1.40–2.84)    |
| Alzheimer's disease and other dementias | All Ages | Both | 24 Cigarette-Equivalents   | 2.94<br>(1.78–4.47)    |
| Alzheimer's disease and other dementias | All Ages | Both | 36 Cigarette-Equivalents   | 3.74<br>(1.97–6.02)    |
| Alzheimer's disease and other dementias | All Ages | Both | 48 Cigarette-Equivalents   | 4.10<br>(2.07–7.23)    |
| Parkinson's disease                     | All Ages | Both | 0 Cigarette-Equivalents    | 1.00<br>(1.00–1.00)    |
| Parkinson's disease                     | All Ages | Both | 7.5 Cigarette-Equivalents  | 0.835<br>(0.644–0.989) |
| Parkinson's disease                     | All Ages | Both | 15 Cigarette-Equivalents   | 0.689<br>(0.531–0.869) |
| Parkinson's disease                     | All Ages | Both | 22.5 Cigarette-Equivalents | 0.604<br>(0.440–0.789) |
| Parkinson's disease                     | All Ages | Both | 30 Cigarette-Equivalents   | 0.520<br>(0.346–0.710) |
| Parkinson's disease                     | All Ages | Both | 37.5 Cigarette-Equivalents | 0.432<br>(0.238–0.644) |
| Parkinson's disease                     | All Ages | Both | 45 Cigarette-Equivalents   | 0.323<br>(0.126–0.561) |
| Multiple sclerosis                      | All Ages | Both | 0 Cigarette-Equivalents    | 1.00<br>(1.00–1.00)    |

|                      |          |      |                            |                     |
|----------------------|----------|------|----------------------------|---------------------|
| Multiple sclerosis   | All Ages | Both | 5.6 Cigarette-Equivalents  | 1.38<br>(1.15–1.62) |
| Multiple sclerosis   | All Ages | Both | 11.2 Cigarette-Equivalents | 1.76<br>(1.49–2.05) |
| Multiple sclerosis   | All Ages | Both | 16.9 Cigarette-Equivalents | 1.96<br>(1.65–2.29) |
| Multiple sclerosis   | All Ages | Both | 22.5 Cigarette-Equivalents | 2.04<br>(1.58–2.55) |
| Diabetes mellitus    | All Ages | Both | 0 Cigarette-Equivalents    | 1.00<br>(1.00–1.00) |
| Diabetes mellitus    | All Ages | Both | 6.5 Cigarette-Equivalents  | 1.44<br>(1.21–1.65) |
| Diabetes mellitus    | All Ages | Both | 12.9 Cigarette-Equivalents | 1.43<br>(1.13–1.76) |
| Diabetes mellitus    | All Ages | Both | 19.4 Cigarette-Equivalents | 1.64<br>(1.25–2.03) |
| Diabetes mellitus    | All Ages | Both | 25.8 Cigarette-Equivalents | 1.66<br>(1.35–1.99) |
| Diabetes mellitus    | All Ages | Both | 32.3 Cigarette-Equivalents | 1.84<br>(1.22–2.46) |
| Diabetes mellitus    | All Ages | Both | 38.8 Cigarette-Equivalents | 2.16<br>(1.16–3.35) |
| Rheumatoid arthritis | All Ages | Both | 0 Cigarette-Equivalents    | 1.00<br>(1.00–1.00) |
| Rheumatoid arthritis | All Ages | Both | 7.5 Cigarette-Equivalents  | 1.41<br>(1.00–1.96) |
| Rheumatoid arthritis | All Ages | Both | 15 Cigarette-Equivalents   | 1.74<br>(1.10–2.63) |
| Rheumatoid arthritis | All Ages | Both | 22.5 Cigarette-Equivalents | 2.00<br>(1.17–3.19) |
| Rheumatoid arthritis | All Ages | Both | 30 Cigarette-Equivalents   | 2.26<br>(1.15–3.91) |
| Rheumatoid arthritis | All Ages | Both | 37.5 Cigarette-Equivalents | 2.44<br>(1.15–4.71) |
| Low back pain        | All Ages | Both | 0 Cigarette-Equivalents    | 1.00<br>(1.00–1.00) |
| Low back pain        | All Ages | Both | 2.5 Cigarette-Equivalents  | 1.32<br>(1.10–1.56) |
| Low back pain        | All Ages | Both | 5 Cigarette-Equivalents    | 1.67<br>(1.39–1.98) |
| Low back pain        | All Ages | Both | 10 Cigarette-Equivalents   | 2.16<br>(1.75–2.64) |
| Low back pain        | All Ages | Both | 15 Cigarette-Equivalents   | 2.24<br>(1.80–2.81) |
| Low back pain        | All Ages | Both | 20 Cigarette-Equivalents   | 2.35<br>(1.61–3.31) |
| Cataract             | All Ages | Both | 0 Cigarette-Equivalents    | 1.00<br>(1.00–1.00) |
| Cataract             | All Ages | Both | 9 Cigarette-Equivalents    | 1.44<br>(1.29–1.61) |
| Cataract             | All Ages | Both | 18 Cigarette-Equivalents   | 1.48<br>(1.29–1.69) |
| Cataract             | All Ages | Both | 27 Cigarette-Equivalents   | 1.79<br>(1.36–2.27) |

|                                  |          |      |                            |                     |
|----------------------------------|----------|------|----------------------------|---------------------|
| Cataract                         | All Ages | Both | 36 Cigarette-Equivalents   | 1.88<br>(1.21–2.73) |
| Age-related macular degeneration | All Ages | Both | 0 Cigarette-Equivalents    | 1.00<br>(1.00–1.00) |
| Age-related macular degeneration | All Ages | Both | 7.5 Cigarette-Equivalents  | 1.35<br>(1.00–1.77) |
| Age-related macular degeneration | All Ages | Both | 15 Cigarette-Equivalents   | 1.67<br>(1.15–2.35) |
| Age-related macular degeneration | All Ages | Both | 22.5 Cigarette-Equivalents | 2.02<br>(1.37–2.78) |
| Age-related macular degeneration | All Ages | Both | 30 Cigarette-Equivalents   | 2.42<br>(1.62–3.35) |
| Fracture                         | All Ages | Both | Prevalence                 | 1.85<br>(1.52–2.25) |

**Supplemental Table S1b.** Results from dose-response meta-regressions for 36 health outcomes caused by smoking, at standardized doses.

| Health Outcome               | Age Group | Sex  | Dose                     | Relative Risk       |
|------------------------------|-----------|------|--------------------------|---------------------|
| Tuberculosis                 | All Ages  | Both | 0 Cigarette-Equivalents  | 1.00<br>(1.00–1.00) |
| Tuberculosis                 | All Ages  | Both | 1 Cigarette-Equivalents  | 1.12<br>(1.07–1.17) |
| Tuberculosis                 | All Ages  | Both | 5 Cigarette-Equivalents  | 1.60<br>(1.34–1.86) |
| Tuberculosis                 | All Ages  | Both | 10 Cigarette-Equivalents | 2.10<br>(1.68–2.52) |
| Tuberculosis                 | All Ages  | Both | 20 Cigarette-Equivalents | 2.47<br>(2.03–2.97) |
| Tuberculosis                 | All Ages  | Both | 30 Cigarette-Equivalents | 3.36<br>(2.61–4.34) |
| Lower respiratory infections | All Ages  | Both | 0 Cigarette-Equivalents  | 1.00<br>(1.00–1.00) |
| Lower respiratory infections | All Ages  | Both | 1 Cigarette-Equivalents  | 1.21<br>(1.00–1.52) |
| Lower respiratory infections | All Ages  | Both | 5 Cigarette-Equivalents  | 1.58<br>(1.26–1.95) |
| Lower respiratory infections | All Ages  | Both | 10 Cigarette-Equivalents | 1.96<br>(1.36–2.73) |
| Lower respiratory infections | All Ages  | Both | 20 Cigarette-Equivalents | 2.47<br>(1.80–3.31) |
| Lower respiratory infections | All Ages  | Both | 30 Cigarette-Equivalents | 3.08<br>(2.32–3.99) |
| Esophageal cancer            | All Ages  | Both | 0 Pack-Years             | 1.00<br>(1.00–1.00) |
| Esophageal cancer            | All Ages  | Both | 1 Pack-Years             | 1.14<br>(1.09–1.19) |
| Esophageal cancer            | All Ages  | Both | 5 Pack-Years             | 1.68<br>(1.44–1.94) |
| Esophageal cancer            | All Ages  | Both | 10 Pack-Years            | 2.36<br>(1.88–2.88) |
| Esophageal cancer            | All Ages  | Both | 20 Pack-Years            | 2.95<br>(2.45–3.44) |
| Esophageal cancer            | All Ages  | Both | 40 Pack-Years            | 3.91<br>(3.09–4.79) |
| Esophageal cancer            | All Ages  | Both | 60 Pack-Years            | 5.33<br>(2.86–8.23) |
| Stomach cancer               | All Ages  | Both | 0 Pack-Years             | 1.00<br>(1.00–1.00) |
| Stomach cancer               | All Ages  | Both | 1 Pack-Years             | 1.03<br>(1.01–1.06) |
| Stomach cancer               | All Ages  | Both | 5 Pack-Years             | 1.17<br>(1.07–1.29) |
| Stomach cancer               | All Ages  | Both | 10 Pack-Years            | 1.34<br>(1.15–1.57) |
| Stomach cancer               | All Ages  | Both | 20 Pack-Years            | 1.53<br>(1.32–1.78) |

|                                     |          |      |               |                     |
|-------------------------------------|----------|------|---------------|---------------------|
| Stomach cancer                      | All Ages | Both | 40 Pack-Years | 1.94<br>(1.58–2.33) |
| Stomach cancer                      | All Ages | Both | 60 Pack-Years | 2.08<br>(1.74–2.44) |
| Liver cancer                        | All Ages | Both | 0 Pack-Years  | 1.00<br>(1.00–1.00) |
| Liver cancer                        | All Ages | Both | 1 Pack-Years  | 1.04<br>(1.00–1.07) |
| Liver cancer                        | All Ages | Both | 5 Pack-Years  | 1.18<br>(1.01–1.36) |
| Liver cancer                        | All Ages | Both | 10 Pack-Years | 1.35<br>(1.03–1.71) |
| Liver cancer                        | All Ages | Both | 20 Pack-Years | 1.56<br>(1.20–1.97) |
| Liver cancer                        | All Ages | Both | 40 Pack-Years | 1.78<br>(1.27–2.38) |
| Liver cancer                        | All Ages | Both | 60 Pack-Years | 1.80<br>(1.19–2.67) |
| Larynx cancer                       | All Ages | Both | 0 Pack-Years  | 1.00<br>(1.00–1.00) |
| Larynx cancer                       | All Ages | Both | 1 Pack-Years  | 1.24<br>(1.12–1.39) |
| Larynx cancer                       | All Ages | Both | 5 Pack-Years  | 2.20<br>(1.60–2.94) |
| Larynx cancer                       | All Ages | Both | 10 Pack-Years | 3.40<br>(2.19–4.88) |
| Larynx cancer                       | All Ages | Both | 20 Pack-Years | 5.88<br>(4.03–8.04) |
| Larynx cancer                       | All Ages | Both | 40 Pack-Years | 13.6<br>(8.67–20.4) |
| Larynx cancer                       | All Ages | Both | 60 Pack-Years | 21.9<br>(10.6–36.7) |
| Tracheal, bronchus, and lung cancer | All Ages | Both | 0 Pack-Years  | 1.00<br>(1.00–1.00) |
| Tracheal, bronchus, and lung cancer | All Ages | Both | 1 Pack-Years  | 1.15<br>(1.04–1.29) |
| Tracheal, bronchus, and lung cancer | All Ages | Both | 5 Pack-Years  | 1.76<br>(1.21–2.45) |
| Tracheal, bronchus, and lung cancer | All Ages | Both | 10 Pack-Years | 3.43<br>(2.92–4.00) |
| Tracheal, bronchus, and lung cancer | All Ages | Both | 20 Pack-Years | 6.47<br>(5.78–7.26) |
| Tracheal, bronchus, and lung cancer | All Ages | Both | 40 Pack-Years | 12.6<br>(10.3–15.1) |
| Tracheal, bronchus, and lung cancer | All Ages | Both | 60 Pack-Years | 15.6<br>(12.4–19.2) |
| Breast cancer                       | All Ages | Male | 0 Pack-Years  | 1.00<br>(1.00–1.00) |
| Breast cancer                       | All Ages | Male | 1 Pack-Years  | 1.00<br>(1.00–1.00) |
| Breast cancer                       | All Ages | Male | 5 Pack-Years  | 1.00<br>(1.00–1.00) |
| Breast cancer                       | All Ages | Male | 10 Pack-Years | 1.00<br>(1.00–1.00) |

|                 |          |        |                          |                     |
|-----------------|----------|--------|--------------------------|---------------------|
| Breast cancer   | All Ages | Male   | 20 Pack-Years            | 1.00<br>(1.00–1.00) |
| Breast cancer   | All Ages | Male   | 40 Pack-Years            | 1.00<br>(1.00–1.00) |
| Breast cancer   | All Ages | Male   | 60 Pack-Years            | 1.00<br>(1.00–1.00) |
| Breast cancer   | All Ages | Female | 0 Pack-Years             | 1.00<br>(1.00–1.00) |
| Breast cancer   | All Ages | Female | 1 Pack-Years             | 1.02<br>(1.01–1.03) |
| Breast cancer   | All Ages | Female | 5 Pack-Years             | 1.08<br>(1.04–1.13) |
| Breast cancer   | All Ages | Female | 10 Pack-Years            | 1.16<br>(1.07–1.25) |
| Breast cancer   | All Ages | Female | 20 Pack-Years            | 1.27<br>(1.19–1.35) |
| Breast cancer   | All Ages | Female | 40 Pack-Years            | 1.24<br>(1.11–1.38) |
| Breast cancer   | All Ages | Female | 60 Pack-Years            | 1.27<br>(1.11–1.45) |
| Cervical cancer | All Ages | Both   | 0 Pack-Years             | 1.00<br>(1.00–1.00) |
| Cervical cancer | All Ages | Both   | 1 Pack-Years             | 1.16<br>(1.02–1.35) |
| Cervical cancer | All Ages | Both   | 5 Pack-Years             | 1.79<br>(1.10–2.75) |
| Cervical cancer | All Ages | Both   | 10 Pack-Years            | 2.05<br>(1.31–3.13) |
| Cervical cancer | All Ages | Both   | 20 Pack-Years            | 3.04<br>(1.74–5.28) |
| Cervical cancer | All Ages | Both   | 40 Pack-Years            | 4.21<br>(1.74–8.53) |
| Cervical cancer | All Ages | Both   | 60 Pack-Years            | 4.21<br>(1.74–8.53) |
| Prostate cancer | All Ages | Male   | 0 Cigarette-Equivalents  | 1.00<br>(1.00–1.00) |
| Prostate cancer | All Ages | Male   | 1 Cigarette-Equivalents  | 1.03<br>(1.00–1.05) |
| Prostate cancer | All Ages | Male   | 5 Cigarette-Equivalents  | 1.13<br>(1.01–1.25) |
| Prostate cancer | All Ages | Male   | 10 Cigarette-Equivalents | 1.19<br>(1.05–1.33) |
| Prostate cancer | All Ages | Male   | 20 Cigarette-Equivalents | 1.17<br>(1.05–1.31) |
| Prostate cancer | All Ages | Male   | 30 Cigarette-Equivalents | 1.24<br>(1.01–1.51) |
| Prostate cancer | All Ages | Female | 0 Cigarette-Equivalents  | 1.00<br>(1.00–1.00) |
| Prostate cancer | All Ages | Female | 1 Cigarette-Equivalents  | 1.00<br>(1.00–1.00) |
| Prostate cancer | All Ages | Female | 5 Cigarette-Equivalents  | 1.00<br>(1.00–1.00) |
| Prostate cancer | All Ages | Female | 10 Cigarette-Equivalents | 1.00<br>(1.00–1.00) |

|                            |          |        |                          |                     |
|----------------------------|----------|--------|--------------------------|---------------------|
| Prostate cancer            | All Ages | Female | 20 Cigarette-Equivalents | 1.00<br>(1.00–1.00) |
| Prostate cancer            | All Ages | Female | 30 Cigarette-Equivalents | 1.00<br>(1.00–1.00) |
| Colon and rectum cancer    | All Ages | Both   | 0 Pack-Years             | 1.00<br>(1.00–1.00) |
| Colon and rectum cancer    | All Ages | Both   | 1 Pack-Years             | 1.03<br>(1.01–1.05) |
| Colon and rectum cancer    | All Ages | Both   | 5 Pack-Years             | 1.13<br>(1.04–1.23) |
| Colon and rectum cancer    | All Ages | Both   | 10 Pack-Years            | 1.27<br>(1.08–1.45) |
| Colon and rectum cancer    | All Ages | Both   | 20 Pack-Years            | 1.51<br>(1.18–1.83) |
| Colon and rectum cancer    | All Ages | Both   | 40 Pack-Years            | 1.60<br>(1.27–2.00) |
| Colon and rectum cancer    | All Ages | Both   | 60 Pack-Years            | 1.58<br>(1.15–2.10) |
| Lip and oral cavity cancer | All Ages | Both   | 0 Pack-Years             | 1.00<br>(1.00–1.00) |
| Lip and oral cavity cancer | All Ages | Both   | 1 Pack-Years             | 1.12<br>(1.07–1.19) |
| Lip and oral cavity cancer | All Ages | Both   | 5 Pack-Years             | 1.62<br>(1.33–1.95) |
| Lip and oral cavity cancer | All Ages | Both   | 10 Pack-Years            | 2.24<br>(1.66–2.90) |
| Lip and oral cavity cancer | All Ages | Both   | 20 Pack-Years            | 3.26<br>(2.42–4.22) |
| Lip and oral cavity cancer | All Ages | Both   | 40 Pack-Years            | 3.82<br>(2.80–4.98) |
| Lip and oral cavity cancer | All Ages | Both   | 60 Pack-Years            | 4.60<br>(3.09–6.50) |
| Nasopharynx cancer         | All Ages | Both   | 0 Pack-Years             | 1.00<br>(1.00–1.00) |
| Nasopharynx cancer         | All Ages | Both   | 1 Pack-Years             | 1.08<br>(1.03–1.14) |
| Nasopharynx cancer         | All Ages | Both   | 5 Pack-Years             | 1.41<br>(1.16–1.71) |
| Nasopharynx cancer         | All Ages | Both   | 10 Pack-Years            | 1.82<br>(1.32–2.42) |
| Nasopharynx cancer         | All Ages | Both   | 20 Pack-Years            | 1.98<br>(1.39–2.72) |
| Nasopharynx cancer         | All Ages | Both   | 40 Pack-Years            | 2.56<br>(1.73–3.59) |
| Nasopharynx cancer         | All Ages | Both   | 60 Pack-Years            | 4.03<br>(2.72–5.75) |
| Other pharynx cancer       | All Ages | Both   | 0 Pack-Years             | 1.00<br>(1.00–1.00) |
| Other pharynx cancer       | All Ages | Both   | 1 Pack-Years             | 1.21<br>(1.13–1.31) |
| Other pharynx cancer       | All Ages | Both   | 5 Pack-Years             | 2.07<br>(1.64–2.55) |
| Other pharynx cancer       | All Ages | Both   | 10 Pack-Years            | 3.14<br>(2.28–4.11) |

|                      |          |        |               |                     |
|----------------------|----------|--------|---------------|---------------------|
| Other pharynx cancer | All Ages | Both   | 20 Pack-Years | 4.85<br>(3.59–6.36) |
| Other pharynx cancer | All Ages | Both   | 40 Pack-Years | 5.60<br>(4.34–7.12) |
| Other pharynx cancer | All Ages | Both   | 60 Pack-Years | 6.83<br>(5.28–8.92) |
| Pancreatic cancer    | All Ages | Male   | 0 Pack-Years  | 1.00<br>(1.00–1.00) |
| Pancreatic cancer    | All Ages | Male   | 1 Pack-Years  | 1.04<br>(1.02–1.06) |
| Pancreatic cancer    | All Ages | Male   | 5 Pack-Years  | 1.21<br>(1.11–1.31) |
| Pancreatic cancer    | All Ages | Male   | 10 Pack-Years | 1.41<br>(1.21–1.62) |
| Pancreatic cancer    | All Ages | Male   | 20 Pack-Years | 1.69<br>(1.47–1.92) |
| Pancreatic cancer    | All Ages | Male   | 40 Pack-Years | 2.00<br>(1.75–2.26) |
| Pancreatic cancer    | All Ages | Male   | 60 Pack-Years | 2.38<br>(1.86–3.00) |
| Pancreatic cancer    | All Ages | Female | 0 Pack-Years  | 1.00<br>(1.00–1.00) |
| Pancreatic cancer    | All Ages | Female | 1 Pack-Years  | 1.09<br>(1.06–1.12) |
| Pancreatic cancer    | All Ages | Female | 5 Pack-Years  | 1.43<br>(1.29–1.58) |
| Pancreatic cancer    | All Ages | Female | 10 Pack-Years | 1.86<br>(1.57–2.17) |
| Pancreatic cancer    | All Ages | Female | 20 Pack-Years | 2.46<br>(2.09–2.87) |
| Pancreatic cancer    | All Ages | Female | 40 Pack-Years | 3.03<br>(2.41–3.67) |
| Pancreatic cancer    | All Ages | Female | 60 Pack-Years | 3.74<br>(2.26–5.61) |
| Kidney cancer        | All Ages | Both   | 0 Pack-Years  | 1.00<br>(1.00–1.00) |
| Kidney cancer        | All Ages | Both   | 1 Pack-Years  | 1.03<br>(1.00–1.06) |
| Kidney cancer        | All Ages | Both   | 5 Pack-Years  | 1.15<br>(1.02–1.30) |
| Kidney cancer        | All Ages | Both   | 10 Pack-Years | 1.30<br>(1.04–1.61) |
| Kidney cancer        | All Ages | Both   | 20 Pack-Years | 1.59<br>(1.29–1.90) |
| Kidney cancer        | All Ages | Both   | 40 Pack-Years | 1.79<br>(1.39–2.27) |
| Kidney cancer        | All Ages | Both   | 60 Pack-Years | 1.99<br>(1.31–2.91) |
| Bladder cancer       | All Ages | Both   | 0 Pack-Years  | 1.00<br>(1.00–1.00) |
| Bladder cancer       | All Ages | Both   | 1 Pack-Years  | 1.12<br>(1.05–1.21) |
| Bladder cancer       | All Ages | Both   | 5 Pack-Years  | 1.60<br>(1.23–2.05) |



|                        |          |        |                          |                     |
|------------------------|----------|--------|--------------------------|---------------------|
| Bladder cancer         | All Ages | Both   | 10 Pack-Years            | 2.20<br>(1.46–3.11) |
| Bladder cancer         | All Ages | Both   | 20 Pack-Years            | 2.98<br>(1.96–3.98) |
| Bladder cancer         | All Ages | Both   | 40 Pack-Years            | 3.94<br>(2.67–5.63) |
| Bladder cancer         | All Ages | Both   | 60 Pack-Years            | 4.55<br>(2.54–7.64) |
| Leukemia               | All Ages | Both   | 0 Pack-Years             | 1.00<br>(1.00–1.00) |
| Leukemia               | All Ages | Both   | 1 Pack-Years             | 1.08<br>(1.00–1.21) |
| Leukemia               | All Ages | Both   | 5 Pack-Years             | 1.41<br>(1.00–2.05) |
| Leukemia               | All Ages | Both   | 10 Pack-Years            | 1.81<br>(1.00–3.10) |
| Leukemia               | All Ages | Both   | 20 Pack-Years            | 2.16<br>(1.33–3.33) |
| Leukemia               | All Ages | Both   | 40 Pack-Years            | 2.64<br>(1.48–4.39) |
| Leukemia               | All Ages | Both   | 60 Pack-Years            | 2.64<br>(1.48–4.39) |
| Ischemic heart disease | 30 to 34 | Male   | 0 Cigarette-Equivalents  | 1.00<br>(1.00–1.00) |
| Ischemic heart disease | 30 to 34 | Male   | 1 Cigarette-Equivalents  | 1.18<br>(1.14–1.21) |
| Ischemic heart disease | 30 to 34 | Male   | 5 Cigarette-Equivalents  | 1.88<br>(1.70–2.06) |
| Ischemic heart disease | 30 to 34 | Male   | 10 Cigarette-Equivalents | 2.75<br>(2.40–3.12) |
| Ischemic heart disease | 30 to 34 | Male   | 20 Cigarette-Equivalents | 3.22<br>(2.84–3.61) |
| Ischemic heart disease | 30 to 34 | Male   | 30 Cigarette-Equivalents | 3.94<br>(3.41–4.48) |
| Ischemic heart disease | 30 to 34 | Female | 0 Cigarette-Equivalents  | 1.00<br>(1.00–1.00) |
| Ischemic heart disease | 30 to 34 | Female | 1 Cigarette-Equivalents  | 1.25<br>(1.17–1.34) |
| Ischemic heart disease | 30 to 34 | Female | 5 Cigarette-Equivalents  | 2.24<br>(1.87–2.70) |
| Ischemic heart disease | 30 to 34 | Female | 10 Cigarette-Equivalents | 3.48<br>(2.75–4.40) |
| Ischemic heart disease | 30 to 34 | Female | 20 Cigarette-Equivalents | 6.04<br>(4.84–7.37) |
| Ischemic heart disease | 30 to 34 | Female | 30 Cigarette-Equivalents | 8.72<br>(6.88–10.8) |
| Ischemic heart disease | 35 to 39 | Male   | 0 Cigarette-Equivalents  | 1.00<br>(1.00–1.00) |
| Ischemic heart disease | 35 to 39 | Male   | 1 Cigarette-Equivalents  | 1.18<br>(1.14–1.21) |
| Ischemic heart disease | 35 to 39 | Male   | 5 Cigarette-Equivalents  | 1.88<br>(1.70–2.06) |
| Ischemic heart disease | 35 to 39 | Male   | 10 Cigarette-Equivalents | 2.75<br>(2.40–3.12) |

|                        |          |        |                          |                     |
|------------------------|----------|--------|--------------------------|---------------------|
| Ischemic heart disease | 35 to 39 | Male   | 20 Cigarette-Equivalents | 3.22<br>(2.84–3.61) |
| Ischemic heart disease | 35 to 39 | Male   | 30 Cigarette-Equivalents | 3.94<br>(3.41–4.48) |
| Ischemic heart disease | 35 to 39 | Female | 0 Cigarette-Equivalents  | 1.00<br>(1.00–1.00) |
| Ischemic heart disease | 35 to 39 | Female | 1 Cigarette-Equivalents  | 1.25<br>(1.17–1.34) |
| Ischemic heart disease | 35 to 39 | Female | 5 Cigarette-Equivalents  | 2.24<br>(1.87–2.70) |
| Ischemic heart disease | 35 to 39 | Female | 10 Cigarette-Equivalents | 3.48<br>(2.75–4.40) |
| Ischemic heart disease | 35 to 39 | Female | 20 Cigarette-Equivalents | 6.04<br>(4.84–7.37) |
| Ischemic heart disease | 35 to 39 | Female | 30 Cigarette-Equivalents | 8.72<br>(6.88–10.8) |
| Ischemic heart disease | 40 to 44 | Male   | 0 Cigarette-Equivalents  | 1.00<br>(1.00–1.00) |
| Ischemic heart disease | 40 to 44 | Male   | 1 Cigarette-Equivalents  | 1.18<br>(1.14–1.21) |
| Ischemic heart disease | 40 to 44 | Male   | 5 Cigarette-Equivalents  | 1.88<br>(1.70–2.06) |
| Ischemic heart disease | 40 to 44 | Male   | 10 Cigarette-Equivalents | 2.75<br>(2.40–3.12) |
| Ischemic heart disease | 40 to 44 | Male   | 20 Cigarette-Equivalents | 3.22<br>(2.84–3.61) |
| Ischemic heart disease | 40 to 44 | Male   | 30 Cigarette-Equivalents | 3.94<br>(3.41–4.48) |
| Ischemic heart disease | 40 to 44 | Female | 0 Cigarette-Equivalents  | 1.00<br>(1.00–1.00) |
| Ischemic heart disease | 40 to 44 | Female | 1 Cigarette-Equivalents  | 1.25<br>(1.17–1.34) |
| Ischemic heart disease | 40 to 44 | Female | 5 Cigarette-Equivalents  | 2.24<br>(1.87–2.70) |
| Ischemic heart disease | 40 to 44 | Female | 10 Cigarette-Equivalents | 3.48<br>(2.75–4.40) |
| Ischemic heart disease | 40 to 44 | Female | 20 Cigarette-Equivalents | 6.04<br>(4.84–7.37) |
| Ischemic heart disease | 40 to 44 | Female | 30 Cigarette-Equivalents | 8.72<br>(6.88–10.8) |
| Ischemic heart disease | 45 to 49 | Male   | 0 Cigarette-Equivalents  | 1.00<br>(1.00–1.00) |
| Ischemic heart disease | 45 to 49 | Male   | 1 Cigarette-Equivalents  | 1.14<br>(1.11–1.16) |
| Ischemic heart disease | 45 to 49 | Male   | 5 Cigarette-Equivalents  | 1.68<br>(1.55–1.81) |
| Ischemic heart disease | 45 to 49 | Male   | 10 Cigarette-Equivalents | 2.36<br>(2.10–2.62) |
| Ischemic heart disease | 45 to 49 | Male   | 20 Cigarette-Equivalents | 2.64<br>(2.38–2.94) |
| Ischemic heart disease | 45 to 49 | Male   | 30 Cigarette-Equivalents | 3.15<br>(2.79–3.54) |
| Ischemic heart disease | 45 to 49 | Female | 0 Cigarette-Equivalents  | 1.00<br>(1.00–1.00) |

|                        |          |        |                          |                     |
|------------------------|----------|--------|--------------------------|---------------------|
| Ischemic heart disease | 45 to 49 | Female | 1 Cigarette-Equivalents  | 1.19<br>(1.14–1.25) |
| Ischemic heart disease | 45 to 49 | Female | 5 Cigarette-Equivalents  | 1.97<br>(1.71–2.26) |
| Ischemic heart disease | 45 to 49 | Female | 10 Cigarette-Equivalents | 2.95<br>(2.42–3.52) |
| Ischemic heart disease | 45 to 49 | Female | 20 Cigarette-Equivalents | 4.53<br>(3.78–5.30) |
| Ischemic heart disease | 45 to 49 | Female | 30 Cigarette-Equivalents | 6.17<br>(5.07–7.40) |
| Ischemic heart disease | 50 to 54 | Male   | 0 Cigarette-Equivalents  | 1.00<br>(1.00–1.00) |
| Ischemic heart disease | 50 to 54 | Male   | 1 Cigarette-Equivalents  | 1.14<br>(1.11–1.16) |
| Ischemic heart disease | 50 to 54 | Male   | 5 Cigarette-Equivalents  | 1.68<br>(1.55–1.81) |
| Ischemic heart disease | 50 to 54 | Male   | 10 Cigarette-Equivalents | 2.36<br>(2.10–2.62) |
| Ischemic heart disease | 50 to 54 | Male   | 20 Cigarette-Equivalents | 2.64<br>(2.38–2.94) |
| Ischemic heart disease | 50 to 54 | Male   | 30 Cigarette-Equivalents | 3.15<br>(2.79–3.54) |
| Ischemic heart disease | 50 to 54 | Female | 0 Cigarette-Equivalents  | 1.00<br>(1.00–1.00) |
| Ischemic heart disease | 50 to 54 | Female | 1 Cigarette-Equivalents  | 1.19<br>(1.14–1.25) |
| Ischemic heart disease | 50 to 54 | Female | 5 Cigarette-Equivalents  | 1.97<br>(1.71–2.26) |
| Ischemic heart disease | 50 to 54 | Female | 10 Cigarette-Equivalents | 2.95<br>(2.42–3.52) |
| Ischemic heart disease | 50 to 54 | Female | 20 Cigarette-Equivalents | 4.53<br>(3.78–5.30) |
| Ischemic heart disease | 50 to 54 | Female | 30 Cigarette-Equivalents | 6.17<br>(5.07–7.40) |
| Ischemic heart disease | 55 to 59 | Male   | 0 Cigarette-Equivalents  | 1.00<br>(1.00–1.00) |
| Ischemic heart disease | 55 to 59 | Male   | 1 Cigarette-Equivalents  | 1.10<br>(1.08–1.12) |
| Ischemic heart disease | 55 to 59 | Male   | 5 Cigarette-Equivalents  | 1.50<br>(1.40–1.60) |
| Ischemic heart disease | 55 to 59 | Male   | 10 Cigarette-Equivalents | 2.00<br>(1.81–2.20) |
| Ischemic heart disease | 55 to 59 | Male   | 20 Cigarette-Equivalents | 2.17<br>(1.99–2.36) |
| Ischemic heart disease | 55 to 59 | Male   | 30 Cigarette-Equivalents | 2.48<br>(2.26–2.74) |
| Ischemic heart disease | 55 to 59 | Female | 0 Cigarette-Equivalents  | 1.00<br>(1.00–1.00) |
| Ischemic heart disease | 55 to 59 | Female | 1 Cigarette-Equivalents  | 1.14<br>(1.11–1.18) |
| Ischemic heart disease | 55 to 59 | Female | 5 Cigarette-Equivalents  | 1.72<br>(1.54–1.90) |
| Ischemic heart disease | 55 to 59 | Female | 10 Cigarette-Equivalents | 2.44<br>(2.07–2.81) |

|                        |          |        |                          |                     |
|------------------------|----------|--------|--------------------------|---------------------|
| Ischemic heart disease | 55 to 59 | Female | 20 Cigarette-Equivalents | 3.36<br>(2.95–3.80) |
| Ischemic heart disease | 55 to 59 | Female | 30 Cigarette-Equivalents | 4.31<br>(3.69–4.96) |
| Ischemic heart disease | 60 to 64 | Male   | 0 Cigarette-Equivalents  | 1.00<br>(1.00–1.00) |
| Ischemic heart disease | 60 to 64 | Male   | 1 Cigarette-Equivalents  | 1.10<br>(1.08–1.12) |
| Ischemic heart disease | 60 to 64 | Male   | 5 Cigarette-Equivalents  | 1.50<br>(1.40–1.60) |
| Ischemic heart disease | 60 to 64 | Male   | 10 Cigarette-Equivalents | 2.00<br>(1.81–2.20) |
| Ischemic heart disease | 60 to 64 | Male   | 20 Cigarette-Equivalents | 2.17<br>(1.99–2.36) |
| Ischemic heart disease | 60 to 64 | Male   | 30 Cigarette-Equivalents | 2.48<br>(2.26–2.74) |
| Ischemic heart disease | 60 to 64 | Female | 0 Cigarette-Equivalents  | 1.00<br>(1.00–1.00) |
| Ischemic heart disease | 60 to 64 | Female | 1 Cigarette-Equivalents  | 1.14<br>(1.11–1.18) |
| Ischemic heart disease | 60 to 64 | Female | 5 Cigarette-Equivalents  | 1.72<br>(1.54–1.90) |
| Ischemic heart disease | 60 to 64 | Female | 10 Cigarette-Equivalents | 2.44<br>(2.07–2.81) |
| Ischemic heart disease | 60 to 64 | Female | 20 Cigarette-Equivalents | 3.36<br>(2.95–3.80) |
| Ischemic heart disease | 60 to 64 | Female | 30 Cigarette-Equivalents | 4.31<br>(3.69–4.96) |
| Ischemic heart disease | 65 to 69 | Male   | 0 Cigarette-Equivalents  | 1.00<br>(1.00–1.00) |
| Ischemic heart disease | 65 to 69 | Male   | 1 Cigarette-Equivalents  | 1.07<br>(1.06–1.08) |
| Ischemic heart disease | 65 to 69 | Male   | 5 Cigarette-Equivalents  | 1.35<br>(1.29–1.41) |
| Ischemic heart disease | 65 to 69 | Male   | 10 Cigarette-Equivalents | 1.69<br>(1.57–1.81) |
| Ischemic heart disease | 65 to 69 | Male   | 20 Cigarette-Equivalents | 1.78<br>(1.66–1.91) |
| Ischemic heart disease | 65 to 69 | Male   | 30 Cigarette-Equivalents | 1.96<br>(1.82–2.11) |
| Ischemic heart disease | 65 to 69 | Female | 0 Cigarette-Equivalents  | 1.00<br>(1.00–1.00) |
| Ischemic heart disease | 65 to 69 | Female | 1 Cigarette-Equivalents  | 1.10<br>(1.08–1.12) |
| Ischemic heart disease | 65 to 69 | Female | 5 Cigarette-Equivalents  | 1.50<br>(1.40–1.61) |
| Ischemic heart disease | 65 to 69 | Female | 10 Cigarette-Equivalents | 2.01<br>(1.81–2.22) |
| Ischemic heart disease | 65 to 69 | Female | 20 Cigarette-Equivalents | 2.47<br>(2.24–2.71) |
| Ischemic heart disease | 65 to 69 | Female | 30 Cigarette-Equivalents | 3.02<br>(2.70–3.35) |
| Ischemic heart disease | 70 to 74 | Male   | 0 Cigarette-Equivalents  | 1.00<br>(1.00–1.00) |

|                        |          |        |                          |                     |
|------------------------|----------|--------|--------------------------|---------------------|
| Ischemic heart disease | 70 to 74 | Male   | 1 Cigarette-Equivalents  | 1.07<br>(1.06–1.08) |
| Ischemic heart disease | 70 to 74 | Male   | 5 Cigarette-Equivalents  | 1.35<br>(1.29–1.41) |
| Ischemic heart disease | 70 to 74 | Male   | 10 Cigarette-Equivalents | 1.69<br>(1.57–1.81) |
| Ischemic heart disease | 70 to 74 | Male   | 20 Cigarette-Equivalents | 1.78<br>(1.66–1.91) |
| Ischemic heart disease | 70 to 74 | Male   | 30 Cigarette-Equivalents | 1.96<br>(1.82–2.11) |
| Ischemic heart disease | 70 to 74 | Female | 0 Cigarette-Equivalents  | 1.00<br>(1.00–1.00) |
| Ischemic heart disease | 70 to 74 | Female | 1 Cigarette-Equivalents  | 1.10<br>(1.08–1.12) |
| Ischemic heart disease | 70 to 74 | Female | 5 Cigarette-Equivalents  | 1.50<br>(1.40–1.61) |
| Ischemic heart disease | 70 to 74 | Female | 10 Cigarette-Equivalents | 2.01<br>(1.81–2.22) |
| Ischemic heart disease | 70 to 74 | Female | 20 Cigarette-Equivalents | 2.47<br>(2.24–2.71) |
| Ischemic heart disease | 70 to 74 | Female | 30 Cigarette-Equivalents | 3.02<br>(2.70–3.35) |
| Ischemic heart disease | 75 to 79 | Male   | 0 Cigarette-Equivalents  | 1.00<br>(1.00–1.00) |
| Ischemic heart disease | 75 to 79 | Male   | 1 Cigarette-Equivalents  | 1.04<br>(1.03–1.05) |
| Ischemic heart disease | 75 to 79 | Male   | 5 Cigarette-Equivalents  | 1.21<br>(1.17–1.25) |
| Ischemic heart disease | 75 to 79 | Male   | 10 Cigarette-Equivalents | 1.41<br>(1.33–1.50) |
| Ischemic heart disease | 75 to 79 | Male   | 20 Cigarette-Equivalents | 1.46<br>(1.38–1.53) |
| Ischemic heart disease | 75 to 79 | Male   | 30 Cigarette-Equivalents | 1.55<br>(1.46–1.64) |
| Ischemic heart disease | 75 to 79 | Female | 0 Cigarette-Equivalents  | 1.00<br>(1.00–1.00) |
| Ischemic heart disease | 75 to 79 | Female | 1 Cigarette-Equivalents  | 1.06<br>(1.05–1.07) |
| Ischemic heart disease | 75 to 79 | Female | 5 Cigarette-Equivalents  | 1.30<br>(1.25–1.35) |
| Ischemic heart disease | 75 to 79 | Female | 10 Cigarette-Equivalents | 1.61<br>(1.50–1.71) |
| Ischemic heart disease | 75 to 79 | Female | 20 Cigarette-Equivalents | 1.81<br>(1.71–1.93) |
| Ischemic heart disease | 75 to 79 | Female | 30 Cigarette-Equivalents | 2.07<br>(1.92–2.22) |
| Ischemic heart disease | 80 to 84 | Male   | 0 Cigarette-Equivalents  | 1.00<br>(1.00–1.00) |
| Ischemic heart disease | 80 to 84 | Male   | 1 Cigarette-Equivalents  | 1.04<br>(1.03–1.05) |
| Ischemic heart disease | 80 to 84 | Male   | 5 Cigarette-Equivalents  | 1.21<br>(1.17–1.25) |
| Ischemic heart disease | 80 to 84 | Male   | 10 Cigarette-Equivalents | 1.41<br>(1.33–1.50) |

|                        |          |        |                          |                     |
|------------------------|----------|--------|--------------------------|---------------------|
| Ischemic heart disease | 80 to 84 | Male   | 20 Cigarette-Equivalents | 1.46<br>(1.38–1.53) |
| Ischemic heart disease | 80 to 84 | Male   | 30 Cigarette-Equivalents | 1.55<br>(1.46–1.64) |
| Ischemic heart disease | 80 to 84 | Female | 0 Cigarette-Equivalents  | 1.00<br>(1.00–1.00) |
| Ischemic heart disease | 80 to 84 | Female | 1 Cigarette-Equivalents  | 1.06<br>(1.05–1.07) |
| Ischemic heart disease | 80 to 84 | Female | 5 Cigarette-Equivalents  | 1.30<br>(1.25–1.35) |
| Ischemic heart disease | 80 to 84 | Female | 10 Cigarette-Equivalents | 1.61<br>(1.50–1.71) |
| Ischemic heart disease | 80 to 84 | Female | 20 Cigarette-Equivalents | 1.81<br>(1.71–1.93) |
| Ischemic heart disease | 80 to 84 | Female | 30 Cigarette-Equivalents | 2.07<br>(1.92–2.22) |
| Ischemic heart disease | 85 to 89 | Male   | 0 Cigarette-Equivalents  | 1.00<br>(1.00–1.00) |
| Ischemic heart disease | 85 to 89 | Male   | 1 Cigarette-Equivalents  | 1.02<br>(1.01–1.02) |
| Ischemic heart disease | 85 to 89 | Male   | 5 Cigarette-Equivalents  | 1.08<br>(1.06–1.11) |
| Ischemic heart disease | 85 to 89 | Male   | 10 Cigarette-Equivalents | 1.17<br>(1.12–1.22) |
| Ischemic heart disease | 85 to 89 | Male   | 20 Cigarette-Equivalents | 1.19<br>(1.15–1.23) |
| Ischemic heart disease | 85 to 89 | Male   | 30 Cigarette-Equivalents | 1.22<br>(1.17–1.27) |
| Ischemic heart disease | 85 to 89 | Female | 0 Cigarette-Equivalents  | 1.00<br>(1.00–1.00) |
| Ischemic heart disease | 85 to 89 | Female | 1 Cigarette-Equivalents  | 1.02<br>(1.02–1.03) |
| Ischemic heart disease | 85 to 89 | Female | 5 Cigarette-Equivalents  | 1.12<br>(1.10–1.15) |
| Ischemic heart disease | 85 to 89 | Female | 10 Cigarette-Equivalents | 1.25<br>(1.20–1.30) |
| Ischemic heart disease | 85 to 89 | Female | 20 Cigarette-Equivalents | 1.32<br>(1.28–1.37) |
| Ischemic heart disease | 85 to 89 | Female | 30 Cigarette-Equivalents | 1.41<br>(1.36–1.47) |
| Ischemic heart disease | 90 to 94 | Male   | 0 Cigarette-Equivalents  | 1.00<br>(1.00–1.00) |
| Ischemic heart disease | 90 to 94 | Male   | 1 Cigarette-Equivalents  | 1.02<br>(1.01–1.02) |
| Ischemic heart disease | 90 to 94 | Male   | 5 Cigarette-Equivalents  | 1.08<br>(1.06–1.11) |
| Ischemic heart disease | 90 to 94 | Male   | 10 Cigarette-Equivalents | 1.17<br>(1.12–1.22) |
| Ischemic heart disease | 90 to 94 | Male   | 20 Cigarette-Equivalents | 1.19<br>(1.15–1.23) |
| Ischemic heart disease | 90 to 94 | Male   | 30 Cigarette-Equivalents | 1.22<br>(1.17–1.27) |
| Ischemic heart disease | 90 to 94 | Female | 0 Cigarette-Equivalents  | 1.00<br>(1.00–1.00) |

|                        |          |        |                          |                     |
|------------------------|----------|--------|--------------------------|---------------------|
| Ischemic heart disease | 90 to 94 | Female | 1 Cigarette-Equivalents  | 1·02<br>(1·02–1·03) |
| Ischemic heart disease | 90 to 94 | Female | 5 Cigarette-Equivalents  | 1·12<br>(1·10–1·15) |
| Ischemic heart disease | 90 to 94 | Female | 10 Cigarette-Equivalents | 1·25<br>(1·20–1·30) |
| Ischemic heart disease | 90 to 94 | Female | 20 Cigarette-Equivalents | 1·32<br>(1·28–1·37) |
| Ischemic heart disease | 90 to 94 | Female | 30 Cigarette-Equivalents | 1·41<br>(1·36–1·47) |
| Ischemic heart disease | 95 plus  | Male   | 0 Cigarette-Equivalents  | 1·00<br>(1·00–1·00) |
| Ischemic heart disease | 95 plus  | Male   | 1 Cigarette-Equivalents  | 1·00<br>(1·00–1·00) |
| Ischemic heart disease | 95 plus  | Male   | 5 Cigarette-Equivalents  | 1·00<br>(1·00–1·00) |
| Ischemic heart disease | 95 plus  | Male   | 10 Cigarette-Equivalents | 1·00<br>(1·00–1·01) |
| Ischemic heart disease | 95 plus  | Male   | 20 Cigarette-Equivalents | 1·00<br>(1·00–1·01) |
| Ischemic heart disease | 95 plus  | Male   | 30 Cigarette-Equivalents | 1·00<br>(1·00–1·01) |
| Ischemic heart disease | 95 plus  | Female | 0 Cigarette-Equivalents  | 1·00<br>(1·00–1·00) |
| Ischemic heart disease | 95 plus  | Female | 1 Cigarette-Equivalents  | 1·00<br>(1·00–1·00) |
| Ischemic heart disease | 95 plus  | Female | 5 Cigarette-Equivalents  | 1·00<br>(1·00–1·01) |
| Ischemic heart disease | 95 plus  | Female | 10 Cigarette-Equivalents | 1·00<br>(1·00–1·01) |
| Ischemic heart disease | 95 plus  | Female | 20 Cigarette-Equivalents | 1·00<br>(1·00–1·01) |
| Ischemic heart disease | 95 plus  | Female | 30 Cigarette-Equivalents | 1·00<br>(1·00–1·01) |
| Stroke                 | 30 to 34 | Male   | 0 Cigarette-Equivalents  | 1·00<br>(1·00–1·00) |
| Stroke                 | 30 to 34 | Male   | 1 Cigarette-Equivalents  | 1·14<br>(1·10–1·17) |
| Stroke                 | 30 to 34 | Male   | 5 Cigarette-Equivalents  | 1·68<br>(1·49–1·87) |
| Stroke                 | 30 to 34 | Male   | 10 Cigarette-Equivalents | 2·36<br>(1·98–2·74) |
| Stroke                 | 30 to 34 | Male   | 20 Cigarette-Equivalents | 2·32<br>(1·92–2·75) |
| Stroke                 | 30 to 34 | Male   | 30 Cigarette-Equivalents | 3·18<br>(2·65–3·77) |
| Stroke                 | 30 to 34 | Female | 0 Cigarette-Equivalents  | 1·00<br>(1·00–1·00) |
| Stroke                 | 30 to 34 | Female | 1 Cigarette-Equivalents  | 1·13<br>(1·07–1·22) |
| Stroke                 | 30 to 34 | Female | 5 Cigarette-Equivalents  | 1·67<br>(1·34–2·08) |
| Stroke                 | 30 to 34 | Female | 10 Cigarette-Equivalents | 2·33<br>(1·69–3·17) |

|        |          |        |                          |                     |
|--------|----------|--------|--------------------------|---------------------|
| Stroke | 30 to 34 | Female | 20 Cigarette-Equivalents | 3.74<br>(2.69–4.98) |
| Stroke | 30 to 34 | Female | 30 Cigarette-Equivalents | 5.49<br>(3.81–7.70) |
| Stroke | 35 to 39 | Male   | 0 Cigarette-Equivalents  | 1.00<br>(1.00–1.00) |
| Stroke | 35 to 39 | Male   | 1 Cigarette-Equivalents  | 1.14<br>(1.10–1.17) |
| Stroke | 35 to 39 | Male   | 5 Cigarette-Equivalents  | 1.68<br>(1.49–1.87) |
| Stroke | 35 to 39 | Male   | 10 Cigarette-Equivalents | 2.36<br>(1.98–2.74) |
| Stroke | 35 to 39 | Male   | 20 Cigarette-Equivalents | 2.32<br>(1.92–2.75) |
| Stroke | 35 to 39 | Male   | 30 Cigarette-Equivalents | 3.18<br>(2.65–3.77) |
| Stroke | 35 to 39 | Female | 0 Cigarette-Equivalents  | 1.00<br>(1.00–1.00) |
| Stroke | 35 to 39 | Female | 1 Cigarette-Equivalents  | 1.13<br>(1.07–1.22) |
| Stroke | 35 to 39 | Female | 5 Cigarette-Equivalents  | 1.67<br>(1.34–2.08) |
| Stroke | 35 to 39 | Female | 10 Cigarette-Equivalents | 2.33<br>(1.69–3.17) |
| Stroke | 35 to 39 | Female | 20 Cigarette-Equivalents | 3.74<br>(2.69–4.98) |
| Stroke | 35 to 39 | Female | 30 Cigarette-Equivalents | 5.49<br>(3.81–7.70) |
| Stroke | 40 to 44 | Male   | 0 Cigarette-Equivalents  | 1.00<br>(1.00–1.00) |
| Stroke | 40 to 44 | Male   | 1 Cigarette-Equivalents  | 1.14<br>(1.10–1.17) |
| Stroke | 40 to 44 | Male   | 5 Cigarette-Equivalents  | 1.68<br>(1.49–1.87) |
| Stroke | 40 to 44 | Male   | 10 Cigarette-Equivalents | 2.36<br>(1.98–2.74) |
| Stroke | 40 to 44 | Male   | 20 Cigarette-Equivalents | 2.32<br>(1.92–2.75) |
| Stroke | 40 to 44 | Male   | 30 Cigarette-Equivalents | 3.18<br>(2.65–3.77) |
| Stroke | 40 to 44 | Female | 0 Cigarette-Equivalents  | 1.00<br>(1.00–1.00) |
| Stroke | 40 to 44 | Female | 1 Cigarette-Equivalents  | 1.13<br>(1.07–1.22) |
| Stroke | 40 to 44 | Female | 5 Cigarette-Equivalents  | 1.67<br>(1.34–2.08) |
| Stroke | 40 to 44 | Female | 10 Cigarette-Equivalents | 2.33<br>(1.69–3.17) |
| Stroke | 40 to 44 | Female | 20 Cigarette-Equivalents | 3.74<br>(2.69–4.98) |
| Stroke | 40 to 44 | Female | 30 Cigarette-Equivalents | 5.49<br>(3.81–7.70) |
| Stroke | 45 to 49 | Male   | 0 Cigarette-Equivalents  | 1.00<br>(1.00–1.00) |



|        |          |        |                          |                     |
|--------|----------|--------|--------------------------|---------------------|
| Stroke | 45 to 49 | Male   | 1 Cigarette-Equivalents  | 1.11<br>(1.08–1.14) |
| Stroke | 45 to 49 | Male   | 5 Cigarette-Equivalents  | 1.56<br>(1.42–1.70) |
| Stroke | 45 to 49 | Male   | 10 Cigarette-Equivalents | 2.11<br>(1.84–2.40) |
| Stroke | 45 to 49 | Male   | 20 Cigarette-Equivalents | 1.97<br>(1.70–2.28) |
| Stroke | 45 to 49 | Male   | 30 Cigarette-Equivalents | 2.67<br>(2.26–3.07) |
| Stroke | 45 to 49 | Female | 0 Cigarette-Equivalents  | 1.00<br>(1.00–1.00) |
| Stroke | 45 to 49 | Female | 1 Cigarette-Equivalents  | 1.11<br>(1.06–1.17) |
| Stroke | 45 to 49 | Female | 5 Cigarette-Equivalents  | 1.55<br>(1.30–1.86) |
| Stroke | 45 to 49 | Female | 10 Cigarette-Equivalents | 2.10<br>(1.60–2.72) |
| Stroke | 45 to 49 | Female | 20 Cigarette-Equivalents | 3.04<br>(2.30–3.94) |
| Stroke | 45 to 49 | Female | 30 Cigarette-Equivalents | 4.21<br>(2.99–5.64) |
| Stroke | 50 to 54 | Male   | 0 Cigarette-Equivalents  | 1.00<br>(1.00–1.00) |
| Stroke | 50 to 54 | Male   | 1 Cigarette-Equivalents  | 1.11<br>(1.08–1.14) |
| Stroke | 50 to 54 | Male   | 5 Cigarette-Equivalents  | 1.56<br>(1.42–1.70) |
| Stroke | 50 to 54 | Male   | 10 Cigarette-Equivalents | 2.11<br>(1.84–2.40) |
| Stroke | 50 to 54 | Male   | 20 Cigarette-Equivalents | 1.97<br>(1.70–2.28) |
| Stroke | 50 to 54 | Male   | 30 Cigarette-Equivalents | 2.67<br>(2.26–3.07) |
| Stroke | 50 to 54 | Female | 0 Cigarette-Equivalents  | 1.00<br>(1.00–1.00) |
| Stroke | 50 to 54 | Female | 1 Cigarette-Equivalents  | 1.11<br>(1.06–1.17) |
| Stroke | 50 to 54 | Female | 5 Cigarette-Equivalents  | 1.55<br>(1.30–1.86) |
| Stroke | 50 to 54 | Female | 10 Cigarette-Equivalents | 2.10<br>(1.60–2.72) |
| Stroke | 50 to 54 | Female | 20 Cigarette-Equivalents | 3.04<br>(2.30–3.94) |
| Stroke | 50 to 54 | Female | 30 Cigarette-Equivalents | 4.21<br>(2.99–5.64) |
| Stroke | 55 to 59 | Male   | 0 Cigarette-Equivalents  | 1.00<br>(1.00–1.00) |
| Stroke | 55 to 59 | Male   | 1 Cigarette-Equivalents  | 1.08<br>(1.06–1.11) |
| Stroke | 55 to 59 | Male   | 5 Cigarette-Equivalents  | 1.42<br>(1.32–1.53) |
| Stroke | 55 to 59 | Male   | 10 Cigarette-Equivalents | 1.84<br>(1.64–2.06) |

|        |          |        |                          |                     |
|--------|----------|--------|--------------------------|---------------------|
| Stroke | 55 to 59 | Male   | 20 Cigarette-Equivalents | 1.66<br>(1.45–1.88) |
| Stroke | 55 to 59 | Male   | 30 Cigarette-Equivalents | 2.22<br>(1.94–2.52) |
| Stroke | 55 to 59 | Female | 0 Cigarette-Equivalents  | 1.00<br>(1.00–1.00) |
| Stroke | 55 to 59 | Female | 1 Cigarette-Equivalents  | 1.09<br>(1.05–1.13) |
| Stroke | 55 to 59 | Female | 5 Cigarette-Equivalents  | 1.46<br>(1.25–1.67) |
| Stroke | 55 to 59 | Female | 10 Cigarette-Equivalents | 1.92<br>(1.51–2.33) |
| Stroke | 55 to 59 | Female | 20 Cigarette-Equivalents | 2.44<br>(1.88–3.06) |
| Stroke | 55 to 59 | Female | 30 Cigarette-Equivalents | 3.14<br>(2.33–4.02) |
| Stroke | 60 to 64 | Male   | 0 Cigarette-Equivalents  | 1.00<br>(1.00–1.00) |
| Stroke | 60 to 64 | Male   | 1 Cigarette-Equivalents  | 1.08<br>(1.06–1.11) |
| Stroke | 60 to 64 | Male   | 5 Cigarette-Equivalents  | 1.42<br>(1.32–1.53) |
| Stroke | 60 to 64 | Male   | 10 Cigarette-Equivalents | 1.84<br>(1.64–2.06) |
| Stroke | 60 to 64 | Male   | 20 Cigarette-Equivalents | 1.66<br>(1.45–1.88) |
| Stroke | 60 to 64 | Male   | 30 Cigarette-Equivalents | 2.22<br>(1.94–2.52) |
| Stroke | 60 to 64 | Female | 0 Cigarette-Equivalents  | 1.00<br>(1.00–1.00) |
| Stroke | 60 to 64 | Female | 1 Cigarette-Equivalents  | 1.09<br>(1.05–1.13) |
| Stroke | 60 to 64 | Female | 5 Cigarette-Equivalents  | 1.46<br>(1.25–1.67) |
| Stroke | 60 to 64 | Female | 10 Cigarette-Equivalents | 1.92<br>(1.51–2.33) |
| Stroke | 60 to 64 | Female | 20 Cigarette-Equivalents | 2.44<br>(1.88–3.06) |
| Stroke | 60 to 64 | Female | 30 Cigarette-Equivalents | 3.14<br>(2.33–4.02) |
| Stroke | 65 to 69 | Male   | 0 Cigarette-Equivalents  | 1.00<br>(1.00–1.00) |
| Stroke | 65 to 69 | Male   | 1 Cigarette-Equivalents  | 1.06<br>(1.05–1.08) |
| Stroke | 65 to 69 | Male   | 5 Cigarette-Equivalents  | 1.30<br>(1.23–1.38) |
| Stroke | 65 to 69 | Male   | 10 Cigarette-Equivalents | 1.61<br>(1.46–1.76) |
| Stroke | 65 to 69 | Male   | 20 Cigarette-Equivalents | 1.42<br>(1.28–1.56) |
| Stroke | 65 to 69 | Male   | 30 Cigarette-Equivalents | 1.85<br>(1.66–2.04) |
| Stroke | 65 to 69 | Female | 0 Cigarette-Equivalents  | 1.00<br>(1.00–1.00) |

|        |          |        |                          |                     |
|--------|----------|--------|--------------------------|---------------------|
| Stroke | 65 to 69 | Female | 1 Cigarette-Equivalents  | 1.07<br>(1.04–1.10) |
| Stroke | 65 to 69 | Female | 5 Cigarette-Equivalents  | 1.36<br>(1.22–1.51) |
| Stroke | 65 to 69 | Female | 10 Cigarette-Equivalents | 1.72<br>(1.44–2.01) |
| Stroke | 65 to 69 | Female | 20 Cigarette-Equivalents | 1.94<br>(1.60–2.28) |
| Stroke | 65 to 69 | Female | 30 Cigarette-Equivalents | 2.30<br>(1.87–2.82) |
| Stroke | 70 to 74 | Male   | 0 Cigarette-Equivalents  | 1.00<br>(1.00–1.00) |
| Stroke | 70 to 74 | Male   | 1 Cigarette-Equivalents  | 1.06<br>(1.05–1.08) |
| Stroke | 70 to 74 | Male   | 5 Cigarette-Equivalents  | 1.30<br>(1.23–1.38) |
| Stroke | 70 to 74 | Male   | 10 Cigarette-Equivalents | 1.61<br>(1.46–1.76) |
| Stroke | 70 to 74 | Male   | 20 Cigarette-Equivalents | 1.42<br>(1.28–1.56) |
| Stroke | 70 to 74 | Male   | 30 Cigarette-Equivalents | 1.85<br>(1.66–2.04) |
| Stroke | 70 to 74 | Female | 0 Cigarette-Equivalents  | 1.00<br>(1.00–1.00) |
| Stroke | 70 to 74 | Female | 1 Cigarette-Equivalents  | 1.07<br>(1.04–1.10) |
| Stroke | 70 to 74 | Female | 5 Cigarette-Equivalents  | 1.36<br>(1.22–1.51) |
| Stroke | 70 to 74 | Female | 10 Cigarette-Equivalents | 1.72<br>(1.44–2.01) |
| Stroke | 70 to 74 | Female | 20 Cigarette-Equivalents | 1.94<br>(1.60–2.28) |
| Stroke | 70 to 74 | Female | 30 Cigarette-Equivalents | 2.30<br>(1.87–2.82) |
| Stroke | 75 to 79 | Male   | 0 Cigarette-Equivalents  | 1.00<br>(1.00–1.00) |
| Stroke | 75 to 79 | Male   | 1 Cigarette-Equivalents  | 1.04<br>(1.03–1.05) |
| Stroke | 75 to 79 | Male   | 5 Cigarette-Equivalents  | 1.19<br>(1.14–1.24) |
| Stroke | 75 to 79 | Male   | 10 Cigarette-Equivalents | 1.39<br>(1.29–1.48) |
| Stroke | 75 to 79 | Male   | 20 Cigarette-Equivalents | 1.22<br>(1.14–1.31) |
| Stroke | 75 to 79 | Male   | 30 Cigarette-Equivalents | 1.52<br>(1.40–1.64) |
| Stroke | 75 to 79 | Female | 0 Cigarette-Equivalents  | 1.00<br>(1.00–1.00) |
| Stroke | 75 to 79 | Female | 1 Cigarette-Equivalents  | 1.05<br>(1.03–1.06) |
| Stroke | 75 to 79 | Female | 5 Cigarette-Equivalents  | 1.24<br>(1.16–1.32) |
| Stroke | 75 to 79 | Female | 10 Cigarette-Equivalents | 1.48<br>(1.32–1.64) |

|        |          |        |                          |                     |
|--------|----------|--------|--------------------------|---------------------|
| Stroke | 75 to 79 | Female | 20 Cigarette-Equivalents | 1.53<br>(1.33–1.72) |
| Stroke | 75 to 79 | Female | 30 Cigarette-Equivalents | 1.72<br>(1.47–2.01) |
| Stroke | 80 to 84 | Male   | 0 Cigarette-Equivalents  | 1.00<br>(1.00–1.00) |
| Stroke | 80 to 84 | Male   | 1 Cigarette-Equivalents  | 1.04<br>(1.03–1.05) |
| Stroke | 80 to 84 | Male   | 5 Cigarette-Equivalents  | 1.19<br>(1.14–1.24) |
| Stroke | 80 to 84 | Male   | 10 Cigarette-Equivalents | 1.39<br>(1.29–1.48) |
| Stroke | 80 to 84 | Male   | 20 Cigarette-Equivalents | 1.22<br>(1.14–1.31) |
| Stroke | 80 to 84 | Male   | 30 Cigarette-Equivalents | 1.52<br>(1.40–1.64) |
| Stroke | 80 to 84 | Female | 0 Cigarette-Equivalents  | 1.00<br>(1.00–1.00) |
| Stroke | 80 to 84 | Female | 1 Cigarette-Equivalents  | 1.05<br>(1.03–1.06) |
| Stroke | 80 to 84 | Female | 5 Cigarette-Equivalents  | 1.24<br>(1.16–1.32) |
| Stroke | 80 to 84 | Female | 10 Cigarette-Equivalents | 1.48<br>(1.32–1.64) |
| Stroke | 80 to 84 | Female | 20 Cigarette-Equivalents | 1.53<br>(1.33–1.72) |
| Stroke | 80 to 84 | Female | 30 Cigarette-Equivalents | 1.72<br>(1.47–2.01) |
| Stroke | 85 to 89 | Male   | 0 Cigarette-Equivalents  | 1.00<br>(1.00–1.00) |
| Stroke | 85 to 89 | Male   | 1 Cigarette-Equivalents  | 1.02<br>(1.01–1.02) |
| Stroke | 85 to 89 | Male   | 5 Cigarette-Equivalents  | 1.08<br>(1.05–1.10) |
| Stroke | 85 to 89 | Male   | 10 Cigarette-Equivalents | 1.15<br>(1.10–1.20) |
| Stroke | 85 to 89 | Male   | 20 Cigarette-Equivalents | 1.08<br>(1.04–1.12) |
| Stroke | 85 to 89 | Male   | 30 Cigarette-Equivalents | 1.21<br>(1.15–1.26) |
| Stroke | 85 to 89 | Female | 0 Cigarette-Equivalents  | 1.00<br>(1.00–1.00) |
| Stroke | 85 to 89 | Female | 1 Cigarette-Equivalents  | 1.02<br>(1.01–1.03) |
| Stroke | 85 to 89 | Female | 5 Cigarette-Equivalents  | 1.10<br>(1.06–1.15) |
| Stroke | 85 to 89 | Female | 10 Cigarette-Equivalents | 1.20<br>(1.12–1.30) |
| Stroke | 85 to 89 | Female | 20 Cigarette-Equivalents | 1.19<br>(1.13–1.27) |
| Stroke | 85 to 89 | Female | 30 Cigarette-Equivalents | 1.29<br>(1.17–1.41) |
| Stroke | 90 to 94 | Male   | 0 Cigarette-Equivalents  | 1.00<br>(1.00–1.00) |

|                                 |          |        |                          |                     |
|---------------------------------|----------|--------|--------------------------|---------------------|
| Stroke                          | 90 to 94 | Male   | 1 Cigarette-Equivalents  | 1·02<br>(1·01–1·02) |
| Stroke                          | 90 to 94 | Male   | 5 Cigarette-Equivalents  | 1·08<br>(1·05–1·10) |
| Stroke                          | 90 to 94 | Male   | 10 Cigarette-Equivalents | 1·15<br>(1·10–1·20) |
| Stroke                          | 90 to 94 | Male   | 20 Cigarette-Equivalents | 1·08<br>(1·04–1·12) |
| Stroke                          | 90 to 94 | Male   | 30 Cigarette-Equivalents | 1·21<br>(1·15–1·26) |
| Stroke                          | 90 to 94 | Female | 0 Cigarette-Equivalents  | 1·00<br>(1·00–1·00) |
| Stroke                          | 90 to 94 | Female | 1 Cigarette-Equivalents  | 1·02<br>(1·01–1·03) |
| Stroke                          | 90 to 94 | Female | 5 Cigarette-Equivalents  | 1·10<br>(1·06–1·15) |
| Stroke                          | 90 to 94 | Female | 10 Cigarette-Equivalents | 1·20<br>(1·12–1·30) |
| Stroke                          | 90 to 94 | Female | 20 Cigarette-Equivalents | 1·19<br>(1·13–1·27) |
| Stroke                          | 90 to 94 | Female | 30 Cigarette-Equivalents | 1·29<br>(1·17–1·41) |
| Stroke                          | 95 plus  | Male   | 0 Cigarette-Equivalents  | 1·00<br>(1·00–1·00) |
| Stroke                          | 95 plus  | Male   | 1 Cigarette-Equivalents  | 1·00<br>(1·00–1·00) |
| Stroke                          | 95 plus  | Male   | 5 Cigarette-Equivalents  | 1·01<br>(1·00–1·02) |
| Stroke                          | 95 plus  | Male   | 10 Cigarette-Equivalents | 1·01<br>(1·00–1·04) |
| Stroke                          | 95 plus  | Male   | 20 Cigarette-Equivalents | 1·00<br>(1·00–1·02) |
| Stroke                          | 95 plus  | Male   | 30 Cigarette-Equivalents | 1·01<br>(1·00–1·03) |
| Stroke                          | 95 plus  | Female | 0 Cigarette-Equivalents  | 1·00<br>(1·00–1·00) |
| Stroke                          | 95 plus  | Female | 1 Cigarette-Equivalents  | 1·00<br>(1·00–1·00) |
| Stroke                          | 95 plus  | Female | 5 Cigarette-Equivalents  | 1·00<br>(1·00–1·01) |
| Stroke                          | 95 plus  | Female | 10 Cigarette-Equivalents | 1·01<br>(1·00–1·03) |
| Stroke                          | 95 plus  | Female | 20 Cigarette-Equivalents | 1·00<br>(1·00–1·01) |
| Stroke                          | 95 plus  | Female | 30 Cigarette-Equivalents | 1·01<br>(1·00–1·02) |
| Atrial fibrillation and flutter | 30 to 34 | Male   | 0 Cigarette-Equivalents  | 1·00<br>(1·00–1·00) |
| Atrial fibrillation and flutter | 30 to 34 | Male   | 1 Cigarette-Equivalents  | 1·08<br>(1·01–1·18) |
| Atrial fibrillation and flutter | 30 to 34 | Male   | 5 Cigarette-Equivalents  | 1·42<br>(1·03–1·91) |
| Atrial fibrillation and flutter | 30 to 34 | Male   | 10 Cigarette-Equivalents | 1·75<br>(1·22–2·42) |

|                                 |          |        |                          |                     |
|---------------------------------|----------|--------|--------------------------|---------------------|
| Atrial fibrillation and flutter | 30 to 34 | Male   | 20 Cigarette-Equivalents | 2.29<br>(1.49–3.40) |
| Atrial fibrillation and flutter | 30 to 34 | Male   | 30 Cigarette-Equivalents | 2.59<br>(1.54–4.08) |
| Atrial fibrillation and flutter | 30 to 34 | Female | 0 Cigarette-Equivalents  | 1.00<br>(1.00–1.00) |
| Atrial fibrillation and flutter | 30 to 34 | Female | 1 Cigarette-Equivalents  | 1.08<br>(1.01–1.18) |
| Atrial fibrillation and flutter | 30 to 34 | Female | 5 Cigarette-Equivalents  | 1.42<br>(1.03–1.91) |
| Atrial fibrillation and flutter | 30 to 34 | Female | 10 Cigarette-Equivalents | 1.75<br>(1.22–2.42) |
| Atrial fibrillation and flutter | 30 to 34 | Female | 20 Cigarette-Equivalents | 2.29<br>(1.49–3.40) |
| Atrial fibrillation and flutter | 30 to 34 | Female | 30 Cigarette-Equivalents | 2.59<br>(1.54–4.08) |
| Atrial fibrillation and flutter | 35 to 39 | Male   | 0 Cigarette-Equivalents  | 1.00<br>(1.00–1.00) |
| Atrial fibrillation and flutter | 35 to 39 | Male   | 1 Cigarette-Equivalents  | 1.08<br>(1.01–1.18) |
| Atrial fibrillation and flutter | 35 to 39 | Male   | 5 Cigarette-Equivalents  | 1.42<br>(1.03–1.91) |
| Atrial fibrillation and flutter | 35 to 39 | Male   | 10 Cigarette-Equivalents | 1.75<br>(1.22–2.42) |
| Atrial fibrillation and flutter | 35 to 39 | Male   | 20 Cigarette-Equivalents | 2.29<br>(1.49–3.40) |
| Atrial fibrillation and flutter | 35 to 39 | Male   | 30 Cigarette-Equivalents | 2.59<br>(1.54–4.08) |
| Atrial fibrillation and flutter | 35 to 39 | Female | 0 Cigarette-Equivalents  | 1.00<br>(1.00–1.00) |
| Atrial fibrillation and flutter | 35 to 39 | Female | 1 Cigarette-Equivalents  | 1.08<br>(1.01–1.18) |
| Atrial fibrillation and flutter | 35 to 39 | Female | 5 Cigarette-Equivalents  | 1.42<br>(1.03–1.91) |
| Atrial fibrillation and flutter | 35 to 39 | Female | 10 Cigarette-Equivalents | 1.75<br>(1.22–2.42) |
| Atrial fibrillation and flutter | 35 to 39 | Female | 20 Cigarette-Equivalents | 2.29<br>(1.49–3.40) |
| Atrial fibrillation and flutter | 35 to 39 | Female | 30 Cigarette-Equivalents | 2.59<br>(1.54–4.08) |
| Atrial fibrillation and flutter | 40 to 44 | Male   | 0 Cigarette-Equivalents  | 1.00<br>(1.00–1.00) |
| Atrial fibrillation and flutter | 40 to 44 | Male   | 1 Cigarette-Equivalents  | 1.08<br>(1.01–1.18) |
| Atrial fibrillation and flutter | 40 to 44 | Male   | 5 Cigarette-Equivalents  | 1.42<br>(1.03–1.91) |
| Atrial fibrillation and flutter | 40 to 44 | Male   | 10 Cigarette-Equivalents | 1.75<br>(1.22–2.42) |
| Atrial fibrillation and flutter | 40 to 44 | Male   | 20 Cigarette-Equivalents | 2.29<br>(1.49–3.40) |
| Atrial fibrillation and flutter | 40 to 44 | Male   | 30 Cigarette-Equivalents | 2.59<br>(1.54–4.08) |
| Atrial fibrillation and flutter | 40 to 44 | Female | 0 Cigarette-Equivalents  | 1.00<br>(1.00–1.00) |

|                                 |          |        |                          |                     |
|---------------------------------|----------|--------|--------------------------|---------------------|
| Atrial fibrillation and flutter | 40 to 44 | Female | 1 Cigarette-Equivalents  | 1·08<br>(1·01–1·18) |
| Atrial fibrillation and flutter | 40 to 44 | Female | 5 Cigarette-Equivalents  | 1·42<br>(1·03–1·91) |
| Atrial fibrillation and flutter | 40 to 44 | Female | 10 Cigarette-Equivalents | 1·75<br>(1·22–2·42) |
| Atrial fibrillation and flutter | 40 to 44 | Female | 20 Cigarette-Equivalents | 2·29<br>(1·49–3·40) |
| Atrial fibrillation and flutter | 40 to 44 | Female | 30 Cigarette-Equivalents | 2·59<br>(1·54–4·08) |
| Atrial fibrillation and flutter | 45 to 49 | Male   | 0 Cigarette-Equivalents  | 1·00<br>(1·00–1·00) |
| Atrial fibrillation and flutter | 45 to 49 | Male   | 1 Cigarette-Equivalents  | 1·08<br>(1·01–1·17) |
| Atrial fibrillation and flutter | 45 to 49 | Male   | 5 Cigarette-Equivalents  | 1·40<br>(1·04–1·83) |
| Atrial fibrillation and flutter | 45 to 49 | Male   | 10 Cigarette-Equivalents | 1·66<br>(1·19–2·22) |
| Atrial fibrillation and flutter | 45 to 49 | Male   | 20 Cigarette-Equivalents | 2·04<br>(1·42–2·93) |
| Atrial fibrillation and flutter | 45 to 49 | Male   | 30 Cigarette-Equivalents | 2·26<br>(1·45–3·40) |
| Atrial fibrillation and flutter | 45 to 49 | Female | 0 Cigarette-Equivalents  | 1·00<br>(1·00–1·00) |
| Atrial fibrillation and flutter | 45 to 49 | Female | 1 Cigarette-Equivalents  | 1·08<br>(1·01–1·17) |
| Atrial fibrillation and flutter | 45 to 49 | Female | 5 Cigarette-Equivalents  | 1·40<br>(1·04–1·83) |
| Atrial fibrillation and flutter | 45 to 49 | Female | 10 Cigarette-Equivalents | 1·66<br>(1·19–2·22) |
| Atrial fibrillation and flutter | 45 to 49 | Female | 20 Cigarette-Equivalents | 2·04<br>(1·42–2·93) |
| Atrial fibrillation and flutter | 45 to 49 | Female | 30 Cigarette-Equivalents | 2·26<br>(1·45–3·40) |
| Atrial fibrillation and flutter | 50 to 54 | Male   | 0 Cigarette-Equivalents  | 1·00<br>(1·00–1·00) |
| Atrial fibrillation and flutter | 50 to 54 | Male   | 1 Cigarette-Equivalents  | 1·08<br>(1·01–1·17) |
| Atrial fibrillation and flutter | 50 to 54 | Male   | 5 Cigarette-Equivalents  | 1·40<br>(1·04–1·83) |
| Atrial fibrillation and flutter | 50 to 54 | Male   | 10 Cigarette-Equivalents | 1·66<br>(1·19–2·22) |
| Atrial fibrillation and flutter | 50 to 54 | Male   | 20 Cigarette-Equivalents | 2·04<br>(1·42–2·93) |
| Atrial fibrillation and flutter | 50 to 54 | Male   | 30 Cigarette-Equivalents | 2·26<br>(1·45–3·40) |
| Atrial fibrillation and flutter | 50 to 54 | Female | 0 Cigarette-Equivalents  | 1·00<br>(1·00–1·00) |
| Atrial fibrillation and flutter | 50 to 54 | Female | 1 Cigarette-Equivalents  | 1·08<br>(1·01–1·17) |
| Atrial fibrillation and flutter | 50 to 54 | Female | 5 Cigarette-Equivalents  | 1·40<br>(1·04–1·83) |
| Atrial fibrillation and flutter | 50 to 54 | Female | 10 Cigarette-Equivalents | 1·66<br>(1·19–2·22) |

|                                 |          |        |                          |                     |
|---------------------------------|----------|--------|--------------------------|---------------------|
| Atrial fibrillation and flutter | 50 to 54 | Female | 20 Cigarette-Equivalents | 2.04<br>(1.42–2.93) |
| Atrial fibrillation and flutter | 50 to 54 | Female | 30 Cigarette-Equivalents | 2.26<br>(1.45–3.40) |
| Atrial fibrillation and flutter | 55 to 59 | Male   | 0 Cigarette-Equivalents  | 1.00<br>(1.00–1.00) |
| Atrial fibrillation and flutter | 55 to 59 | Male   | 1 Cigarette-Equivalents  | 1.08<br>(1.01–1.15) |
| Atrial fibrillation and flutter | 55 to 59 | Male   | 5 Cigarette-Equivalents  | 1.38<br>(1.03–1.74) |
| Atrial fibrillation and flutter | 55 to 59 | Male   | 10 Cigarette-Equivalents | 1.57<br>(1.16–2.00) |
| Atrial fibrillation and flutter | 55 to 59 | Male   | 20 Cigarette-Equivalents | 1.80<br>(1.30–2.48) |
| Atrial fibrillation and flutter | 55 to 59 | Male   | 30 Cigarette-Equivalents | 1.95<br>(1.35–2.87) |
| Atrial fibrillation and flutter | 55 to 59 | Female | 0 Cigarette-Equivalents  | 1.00<br>(1.00–1.00) |
| Atrial fibrillation and flutter | 55 to 59 | Female | 1 Cigarette-Equivalents  | 1.08<br>(1.01–1.15) |
| Atrial fibrillation and flutter | 55 to 59 | Female | 5 Cigarette-Equivalents  | 1.38<br>(1.03–1.74) |
| Atrial fibrillation and flutter | 55 to 59 | Female | 10 Cigarette-Equivalents | 1.57<br>(1.16–2.00) |
| Atrial fibrillation and flutter | 55 to 59 | Female | 20 Cigarette-Equivalents | 1.80<br>(1.30–2.48) |
| Atrial fibrillation and flutter | 55 to 59 | Female | 30 Cigarette-Equivalents | 1.95<br>(1.35–2.87) |
| Atrial fibrillation and flutter | 60 to 64 | Male   | 0 Cigarette-Equivalents  | 1.00<br>(1.00–1.00) |
| Atrial fibrillation and flutter | 60 to 64 | Male   | 1 Cigarette-Equivalents  | 1.08<br>(1.01–1.15) |
| Atrial fibrillation and flutter | 60 to 64 | Male   | 5 Cigarette-Equivalents  | 1.38<br>(1.03–1.74) |
| Atrial fibrillation and flutter | 60 to 64 | Male   | 10 Cigarette-Equivalents | 1.57<br>(1.16–2.00) |
| Atrial fibrillation and flutter | 60 to 64 | Male   | 20 Cigarette-Equivalents | 1.80<br>(1.30–2.48) |
| Atrial fibrillation and flutter | 60 to 64 | Male   | 30 Cigarette-Equivalents | 1.95<br>(1.35–2.87) |
| Atrial fibrillation and flutter | 60 to 64 | Female | 0 Cigarette-Equivalents  | 1.00<br>(1.00–1.00) |
| Atrial fibrillation and flutter | 60 to 64 | Female | 1 Cigarette-Equivalents  | 1.08<br>(1.01–1.15) |
| Atrial fibrillation and flutter | 60 to 64 | Female | 5 Cigarette-Equivalents  | 1.38<br>(1.03–1.74) |
| Atrial fibrillation and flutter | 60 to 64 | Female | 10 Cigarette-Equivalents | 1.57<br>(1.16–2.00) |
| Atrial fibrillation and flutter | 60 to 64 | Female | 20 Cigarette-Equivalents | 1.80<br>(1.30–2.48) |
| Atrial fibrillation and flutter | 60 to 64 | Female | 30 Cigarette-Equivalents | 1.95<br>(1.35–2.87) |
| Atrial fibrillation and flutter | 65 to 69 | Male   | 0 Cigarette-Equivalents  | 1.00<br>(1.00–1.00) |



|                                 |          |        |                          |                     |
|---------------------------------|----------|--------|--------------------------|---------------------|
| Atrial fibrillation and flutter | 65 to 69 | Male   | 1 Cigarette-Equivalents  | 1·07<br>(1·01–1·12) |
| Atrial fibrillation and flutter | 65 to 69 | Male   | 5 Cigarette-Equivalents  | 1·34<br>(1·03–1·62) |
| Atrial fibrillation and flutter | 65 to 69 | Male   | 10 Cigarette-Equivalents | 1·45<br>(1·14–1·76) |
| Atrial fibrillation and flutter | 65 to 69 | Male   | 20 Cigarette-Equivalents | 1·54<br>(1·20–2·05) |
| Atrial fibrillation and flutter | 65 to 69 | Male   | 30 Cigarette-Equivalents | 1·63<br>(1·23–2·19) |
| Atrial fibrillation and flutter | 65 to 69 | Female | 0 Cigarette-Equivalents  | 1·00<br>(1·00–1·00) |
| Atrial fibrillation and flutter | 65 to 69 | Female | 1 Cigarette-Equivalents  | 1·07<br>(1·01–1·12) |
| Atrial fibrillation and flutter | 65 to 69 | Female | 5 Cigarette-Equivalents  | 1·34<br>(1·03–1·62) |
| Atrial fibrillation and flutter | 65 to 69 | Female | 10 Cigarette-Equivalents | 1·45<br>(1·14–1·76) |
| Atrial fibrillation and flutter | 65 to 69 | Female | 20 Cigarette-Equivalents | 1·54<br>(1·20–2·05) |
| Atrial fibrillation and flutter | 65 to 69 | Female | 30 Cigarette-Equivalents | 1·63<br>(1·23–2·19) |
| Atrial fibrillation and flutter | 70 to 74 | Male   | 0 Cigarette-Equivalents  | 1·00<br>(1·00–1·00) |
| Atrial fibrillation and flutter | 70 to 74 | Male   | 1 Cigarette-Equivalents  | 1·07<br>(1·01–1·12) |
| Atrial fibrillation and flutter | 70 to 74 | Male   | 5 Cigarette-Equivalents  | 1·34<br>(1·03–1·62) |
| Atrial fibrillation and flutter | 70 to 74 | Male   | 10 Cigarette-Equivalents | 1·45<br>(1·14–1·76) |
| Atrial fibrillation and flutter | 70 to 74 | Male   | 20 Cigarette-Equivalents | 1·54<br>(1·20–2·05) |
| Atrial fibrillation and flutter | 70 to 74 | Male   | 30 Cigarette-Equivalents | 1·63<br>(1·23–2·19) |
| Atrial fibrillation and flutter | 70 to 74 | Female | 0 Cigarette-Equivalents  | 1·00<br>(1·00–1·00) |
| Atrial fibrillation and flutter | 70 to 74 | Female | 1 Cigarette-Equivalents  | 1·07<br>(1·01–1·12) |
| Atrial fibrillation and flutter | 70 to 74 | Female | 5 Cigarette-Equivalents  | 1·34<br>(1·03–1·62) |
| Atrial fibrillation and flutter | 70 to 74 | Female | 10 Cigarette-Equivalents | 1·45<br>(1·14–1·76) |
| Atrial fibrillation and flutter | 70 to 74 | Female | 20 Cigarette-Equivalents | 1·54<br>(1·20–2·05) |
| Atrial fibrillation and flutter | 70 to 74 | Female | 30 Cigarette-Equivalents | 1·63<br>(1·23–2·19) |
| Atrial fibrillation and flutter | 75 to 79 | Male   | 0 Cigarette-Equivalents  | 1·00<br>(1·00–1·00) |
| Atrial fibrillation and flutter | 75 to 79 | Male   | 1 Cigarette-Equivalents  | 1·05<br>(1·01–1·09) |
| Atrial fibrillation and flutter | 75 to 79 | Male   | 5 Cigarette-Equivalents  | 1·26<br>(1·04–1·47) |
| Atrial fibrillation and flutter | 75 to 79 | Male   | 10 Cigarette-Equivalents | 1·30<br>(1·10–1·51) |

|                                 |          |        |                          |                     |
|---------------------------------|----------|--------|--------------------------|---------------------|
| Atrial fibrillation and flutter | 75 to 79 | Male   | 20 Cigarette-Equivalents | 1·31<br>(1·07–1·66) |
| Atrial fibrillation and flutter | 75 to 79 | Male   | 30 Cigarette-Equivalents | 1·37<br>(1·10–1·74) |
| Atrial fibrillation and flutter | 75 to 79 | Female | 0 Cigarette-Equivalents  | 1·00<br>(1·00–1·00) |
| Atrial fibrillation and flutter | 75 to 79 | Female | 1 Cigarette-Equivalents  | 1·05<br>(1·01–1·09) |
| Atrial fibrillation and flutter | 75 to 79 | Female | 5 Cigarette-Equivalents  | 1·26<br>(1·04–1·47) |
| Atrial fibrillation and flutter | 75 to 79 | Female | 10 Cigarette-Equivalents | 1·30<br>(1·10–1·51) |
| Atrial fibrillation and flutter | 75 to 79 | Female | 20 Cigarette-Equivalents | 1·31<br>(1·07–1·66) |
| Atrial fibrillation and flutter | 75 to 79 | Female | 30 Cigarette-Equivalents | 1·37<br>(1·10–1·74) |
| Atrial fibrillation and flutter | 80 to 84 | Male   | 0 Cigarette-Equivalents  | 1·00<br>(1·00–1·00) |
| Atrial fibrillation and flutter | 80 to 84 | Male   | 1 Cigarette-Equivalents  | 1·05<br>(1·01–1·09) |
| Atrial fibrillation and flutter | 80 to 84 | Male   | 5 Cigarette-Equivalents  | 1·26<br>(1·04–1·47) |
| Atrial fibrillation and flutter | 80 to 84 | Male   | 10 Cigarette-Equivalents | 1·30<br>(1·10–1·51) |
| Atrial fibrillation and flutter | 80 to 84 | Male   | 20 Cigarette-Equivalents | 1·31<br>(1·07–1·66) |
| Atrial fibrillation and flutter | 80 to 84 | Male   | 30 Cigarette-Equivalents | 1·37<br>(1·10–1·74) |
| Atrial fibrillation and flutter | 80 to 84 | Female | 0 Cigarette-Equivalents  | 1·00<br>(1·00–1·00) |
| Atrial fibrillation and flutter | 80 to 84 | Female | 1 Cigarette-Equivalents  | 1·05<br>(1·01–1·09) |
| Atrial fibrillation and flutter | 80 to 84 | Female | 5 Cigarette-Equivalents  | 1·26<br>(1·04–1·47) |
| Atrial fibrillation and flutter | 80 to 84 | Female | 10 Cigarette-Equivalents | 1·30<br>(1·10–1·51) |
| Atrial fibrillation and flutter | 80 to 84 | Female | 20 Cigarette-Equivalents | 1·31<br>(1·07–1·66) |
| Atrial fibrillation and flutter | 80 to 84 | Female | 30 Cigarette-Equivalents | 1·37<br>(1·10–1·74) |
| Atrial fibrillation and flutter | 85 to 89 | Male   | 0 Cigarette-Equivalents  | 1·00<br>(1·00–1·00) |
| Atrial fibrillation and flutter | 85 to 89 | Male   | 1 Cigarette-Equivalents  | 1·03<br>(1·00–1·06) |
| Atrial fibrillation and flutter | 85 to 89 | Male   | 5 Cigarette-Equivalents  | 1·14<br>(1·00–1·28) |
| Atrial fibrillation and flutter | 85 to 89 | Male   | 10 Cigarette-Equivalents | 1·15<br>(1·03–1·28) |
| Atrial fibrillation and flutter | 85 to 89 | Male   | 20 Cigarette-Equivalents | 1·13<br>(1·01–1·35) |
| Atrial fibrillation and flutter | 85 to 89 | Male   | 30 Cigarette-Equivalents | 1·16<br>(1·00–1·37) |
| Atrial fibrillation and flutter | 85 to 89 | Female | 0 Cigarette-Equivalents  | 1·00<br>(1·00–1·00) |

|                                 |          |        |                          |                     |
|---------------------------------|----------|--------|--------------------------|---------------------|
| Atrial fibrillation and flutter | 85 to 89 | Female | 1 Cigarette-Equivalents  | 1·03<br>(1·00–1·06) |
| Atrial fibrillation and flutter | 85 to 89 | Female | 5 Cigarette-Equivalents  | 1·14<br>(1·00–1·28) |
| Atrial fibrillation and flutter | 85 to 89 | Female | 10 Cigarette-Equivalents | 1·15<br>(1·03–1·28) |
| Atrial fibrillation and flutter | 85 to 89 | Female | 20 Cigarette-Equivalents | 1·13<br>(1·01–1·35) |
| Atrial fibrillation and flutter | 85 to 89 | Female | 30 Cigarette-Equivalents | 1·16<br>(1·00–1·37) |
| Atrial fibrillation and flutter | 90 to 94 | Male   | 0 Cigarette-Equivalents  | 1·00<br>(1·00–1·00) |
| Atrial fibrillation and flutter | 90 to 94 | Male   | 1 Cigarette-Equivalents  | 1·03<br>(1·00–1·06) |
| Atrial fibrillation and flutter | 90 to 94 | Male   | 5 Cigarette-Equivalents  | 1·14<br>(1·00–1·28) |
| Atrial fibrillation and flutter | 90 to 94 | Male   | 10 Cigarette-Equivalents | 1·15<br>(1·03–1·28) |
| Atrial fibrillation and flutter | 90 to 94 | Male   | 20 Cigarette-Equivalents | 1·13<br>(1·01–1·35) |
| Atrial fibrillation and flutter | 90 to 94 | Male   | 30 Cigarette-Equivalents | 1·16<br>(1·00–1·37) |
| Atrial fibrillation and flutter | 90 to 94 | Female | 0 Cigarette-Equivalents  | 1·00<br>(1·00–1·00) |
| Atrial fibrillation and flutter | 90 to 94 | Female | 1 Cigarette-Equivalents  | 1·03<br>(1·00–1·06) |
| Atrial fibrillation and flutter | 90 to 94 | Female | 5 Cigarette-Equivalents  | 1·14<br>(1·00–1·28) |
| Atrial fibrillation and flutter | 90 to 94 | Female | 10 Cigarette-Equivalents | 1·15<br>(1·03–1·28) |
| Atrial fibrillation and flutter | 90 to 94 | Female | 20 Cigarette-Equivalents | 1·13<br>(1·01–1·35) |
| Atrial fibrillation and flutter | 90 to 94 | Female | 30 Cigarette-Equivalents | 1·16<br>(1·00–1·37) |
| Atrial fibrillation and flutter | 95 plus  | Male   | 0 Cigarette-Equivalents  | 1·00<br>(1·00–1·00) |
| Atrial fibrillation and flutter | 95 plus  | Male   | 1 Cigarette-Equivalents  | 1·00<br>(1·00–1·01) |
| Atrial fibrillation and flutter | 95 plus  | Male   | 5 Cigarette-Equivalents  | 1·01<br>(1·00–1·04) |
| Atrial fibrillation and flutter | 95 plus  | Male   | 10 Cigarette-Equivalents | 1·02<br>(1·00–1·07) |
| Atrial fibrillation and flutter | 95 plus  | Male   | 20 Cigarette-Equivalents | 1·03<br>(1·00–1·13) |
| Atrial fibrillation and flutter | 95 plus  | Male   | 30 Cigarette-Equivalents | 1·01<br>(1·00–1·09) |
| Atrial fibrillation and flutter | 95 plus  | Female | 0 Cigarette-Equivalents  | 1·00<br>(1·00–1·00) |
| Atrial fibrillation and flutter | 95 plus  | Female | 1 Cigarette-Equivalents  | 1·00<br>(1·00–1·01) |
| Atrial fibrillation and flutter | 95 plus  | Female | 5 Cigarette-Equivalents  | 1·01<br>(1·00–1·04) |
| Atrial fibrillation and flutter | 95 plus  | Female | 10 Cigarette-Equivalents | 1·02<br>(1·00–1·07) |

|                                 |          |        |                          |                     |
|---------------------------------|----------|--------|--------------------------|---------------------|
| Atrial fibrillation and flutter | 95 plus  | Female | 20 Cigarette-Equivalents | 1-03<br>(1-00-1-13) |
| Atrial fibrillation and flutter | 95 plus  | Female | 30 Cigarette-Equivalents | 1-01<br>(1-00-1-09) |
| Aortic aneurysm                 | 30 to 34 | Male   | 0 Cigarette-Equivalents  | 1-00<br>(1-00-1-00) |
| Aortic aneurysm                 | 30 to 34 | Male   | 1 Cigarette-Equivalents  | 1-34<br>(1-22-1-46) |
| Aortic aneurysm                 | 30 to 34 | Male   | 5 Cigarette-Equivalents  | 2-69<br>(2-12-3-30) |
| Aortic aneurysm                 | 30 to 34 | Male   | 10 Cigarette-Equivalents | 4-37<br>(3-24-5-60) |
| Aortic aneurysm                 | 30 to 34 | Male   | 20 Cigarette-Equivalents | 8-04<br>(6-14-10-1) |
| Aortic aneurysm                 | 30 to 34 | Male   | 30 Cigarette-Equivalents | 11-0<br>(7-98-14-5) |
| Aortic aneurysm                 | 30 to 34 | Female | 0 Cigarette-Equivalents  | 1-00<br>(1-00-1-00) |
| Aortic aneurysm                 | 30 to 34 | Female | 1 Cigarette-Equivalents  | 1-34<br>(1-22-1-46) |
| Aortic aneurysm                 | 30 to 34 | Female | 5 Cigarette-Equivalents  | 2-69<br>(2-12-3-30) |
| Aortic aneurysm                 | 30 to 34 | Female | 10 Cigarette-Equivalents | 4-37<br>(3-24-5-60) |
| Aortic aneurysm                 | 30 to 34 | Female | 20 Cigarette-Equivalents | 8-04<br>(6-14-10-1) |
| Aortic aneurysm                 | 30 to 34 | Female | 30 Cigarette-Equivalents | 11-0<br>(7-98-14-5) |
| Aortic aneurysm                 | 35 to 39 | Male   | 0 Cigarette-Equivalents  | 1-00<br>(1-00-1-00) |
| Aortic aneurysm                 | 35 to 39 | Male   | 1 Cigarette-Equivalents  | 1-34<br>(1-22-1-46) |
| Aortic aneurysm                 | 35 to 39 | Male   | 5 Cigarette-Equivalents  | 2-69<br>(2-12-3-30) |
| Aortic aneurysm                 | 35 to 39 | Male   | 10 Cigarette-Equivalents | 4-37<br>(3-24-5-60) |
| Aortic aneurysm                 | 35 to 39 | Male   | 20 Cigarette-Equivalents | 8-04<br>(6-14-10-1) |
| Aortic aneurysm                 | 35 to 39 | Male   | 30 Cigarette-Equivalents | 11-0<br>(7-98-14-5) |
| Aortic aneurysm                 | 35 to 39 | Female | 0 Cigarette-Equivalents  | 1-00<br>(1-00-1-00) |
| Aortic aneurysm                 | 35 to 39 | Female | 1 Cigarette-Equivalents  | 1-34<br>(1-22-1-46) |
| Aortic aneurysm                 | 35 to 39 | Female | 5 Cigarette-Equivalents  | 2-69<br>(2-12-3-30) |
| Aortic aneurysm                 | 35 to 39 | Female | 10 Cigarette-Equivalents | 4-37<br>(3-24-5-60) |
| Aortic aneurysm                 | 35 to 39 | Female | 20 Cigarette-Equivalents | 8-04<br>(6-14-10-1) |
| Aortic aneurysm                 | 35 to 39 | Female | 30 Cigarette-Equivalents | 11-0<br>(7-98-14-5) |
| Aortic aneurysm                 | 40 to 44 | Male   | 0 Cigarette-Equivalents  | 1-00<br>(1-00-1-00) |

|                 |          |        |                          |                     |
|-----------------|----------|--------|--------------------------|---------------------|
| Aortic aneurysm | 40 to 44 | Male   | 1 Cigarette-Equivalents  | 1:34<br>(1:22–1:46) |
| Aortic aneurysm | 40 to 44 | Male   | 5 Cigarette-Equivalents  | 2:69<br>(2:12–3:30) |
| Aortic aneurysm | 40 to 44 | Male   | 10 Cigarette-Equivalents | 4:37<br>(3:24–5:60) |
| Aortic aneurysm | 40 to 44 | Male   | 20 Cigarette-Equivalents | 8:04<br>(6:14–10:1) |
| Aortic aneurysm | 40 to 44 | Male   | 30 Cigarette-Equivalents | 11:0<br>(7:98–14:5) |
| Aortic aneurysm | 40 to 44 | Female | 0 Cigarette-Equivalents  | 1:00<br>(1:00–1:00) |
| Aortic aneurysm | 40 to 44 | Female | 1 Cigarette-Equivalents  | 1:34<br>(1:22–1:46) |
| Aortic aneurysm | 40 to 44 | Female | 5 Cigarette-Equivalents  | 2:69<br>(2:12–3:30) |
| Aortic aneurysm | 40 to 44 | Female | 10 Cigarette-Equivalents | 4:37<br>(3:24–5:60) |
| Aortic aneurysm | 40 to 44 | Female | 20 Cigarette-Equivalents | 8:04<br>(6:14–10:1) |
| Aortic aneurysm | 40 to 44 | Female | 30 Cigarette-Equivalents | 11:0<br>(7:98–14:5) |
| Aortic aneurysm | 45 to 49 | Male   | 0 Cigarette-Equivalents  | 1:00<br>(1:00–1:00) |
| Aortic aneurysm | 45 to 49 | Male   | 1 Cigarette-Equivalents  | 1:27<br>(1:18–1:36) |
| Aortic aneurysm | 45 to 49 | Male   | 5 Cigarette-Equivalents  | 2:33<br>(1:92–2:79) |
| Aortic aneurysm | 45 to 49 | Male   | 10 Cigarette-Equivalents | 3:67<br>(2:84–4:58) |
| Aortic aneurysm | 45 to 49 | Male   | 20 Cigarette-Equivalents | 5:88<br>(4:69–7:23) |
| Aortic aneurysm | 45 to 49 | Male   | 30 Cigarette-Equivalents | 7:61<br>(5:89–9:60) |
| Aortic aneurysm | 45 to 49 | Female | 0 Cigarette-Equivalents  | 1:00<br>(1:00–1:00) |
| Aortic aneurysm | 45 to 49 | Female | 1 Cigarette-Equivalents  | 1:27<br>(1:18–1:36) |
| Aortic aneurysm | 45 to 49 | Female | 5 Cigarette-Equivalents  | 2:33<br>(1:92–2:79) |
| Aortic aneurysm | 45 to 49 | Female | 10 Cigarette-Equivalents | 3:67<br>(2:84–4:58) |
| Aortic aneurysm | 45 to 49 | Female | 20 Cigarette-Equivalents | 5:88<br>(4:69–7:23) |
| Aortic aneurysm | 45 to 49 | Female | 30 Cigarette-Equivalents | 7:61<br>(5:89–9:60) |
| Aortic aneurysm | 50 to 54 | Male   | 0 Cigarette-Equivalents  | 1:00<br>(1:00–1:00) |
| Aortic aneurysm | 50 to 54 | Male   | 1 Cigarette-Equivalents  | 1:27<br>(1:18–1:36) |
| Aortic aneurysm | 50 to 54 | Male   | 5 Cigarette-Equivalents  | 2:33<br>(1:92–2:79) |
| Aortic aneurysm | 50 to 54 | Male   | 10 Cigarette-Equivalents | 3:67<br>(2:84–4:58) |

|                 |          |        |                          |                     |
|-----------------|----------|--------|--------------------------|---------------------|
| Aortic aneurysm | 50 to 54 | Male   | 20 Cigarette-Equivalents | 5.88<br>(4.69–7.23) |
| Aortic aneurysm | 50 to 54 | Male   | 30 Cigarette-Equivalents | 7.61<br>(5.89–9.60) |
| Aortic aneurysm | 50 to 54 | Female | 0 Cigarette-Equivalents  | 1.00<br>(1.00–1.00) |
| Aortic aneurysm | 50 to 54 | Female | 1 Cigarette-Equivalents  | 1.27<br>(1.18–1.36) |
| Aortic aneurysm | 50 to 54 | Female | 5 Cigarette-Equivalents  | 2.33<br>(1.92–2.79) |
| Aortic aneurysm | 50 to 54 | Female | 10 Cigarette-Equivalents | 3.67<br>(2.84–4.58) |
| Aortic aneurysm | 50 to 54 | Female | 20 Cigarette-Equivalents | 5.88<br>(4.69–7.23) |
| Aortic aneurysm | 50 to 54 | Female | 30 Cigarette-Equivalents | 7.61<br>(5.89–9.60) |
| Aortic aneurysm | 55 to 59 | Male   | 0 Cigarette-Equivalents  | 1.00<br>(1.00–1.00) |
| Aortic aneurysm | 55 to 59 | Male   | 1 Cigarette-Equivalents  | 1.20<br>(1.14–1.26) |
| Aortic aneurysm | 55 to 59 | Male   | 5 Cigarette-Equivalents  | 2.00<br>(1.71–2.32) |
| Aortic aneurysm | 55 to 59 | Male   | 10 Cigarette-Equivalents | 3.00<br>(2.43–3.64) |
| Aortic aneurysm | 55 to 59 | Male   | 20 Cigarette-Equivalents | 4.21<br>(3.54–4.98) |
| Aortic aneurysm | 55 to 59 | Male   | 30 Cigarette-Equivalents | 5.12<br>(4.19–6.21) |
| Aortic aneurysm | 55 to 59 | Female | 0 Cigarette-Equivalents  | 1.00<br>(1.00–1.00) |
| Aortic aneurysm | 55 to 59 | Female | 1 Cigarette-Equivalents  | 1.20<br>(1.14–1.26) |
| Aortic aneurysm | 55 to 59 | Female | 5 Cigarette-Equivalents  | 2.00<br>(1.71–2.32) |
| Aortic aneurysm | 55 to 59 | Female | 10 Cigarette-Equivalents | 3.00<br>(2.43–3.64) |
| Aortic aneurysm | 55 to 59 | Female | 20 Cigarette-Equivalents | 4.21<br>(3.54–4.98) |
| Aortic aneurysm | 55 to 59 | Female | 30 Cigarette-Equivalents | 5.12<br>(4.19–6.21) |
| Aortic aneurysm | 60 to 64 | Male   | 0 Cigarette-Equivalents  | 1.00<br>(1.00–1.00) |
| Aortic aneurysm | 60 to 64 | Male   | 1 Cigarette-Equivalents  | 1.20<br>(1.14–1.26) |
| Aortic aneurysm | 60 to 64 | Male   | 5 Cigarette-Equivalents  | 2.00<br>(1.71–2.32) |
| Aortic aneurysm | 60 to 64 | Male   | 10 Cigarette-Equivalents | 3.00<br>(2.43–3.64) |
| Aortic aneurysm | 60 to 64 | Male   | 20 Cigarette-Equivalents | 4.21<br>(3.54–4.98) |
| Aortic aneurysm | 60 to 64 | Male   | 30 Cigarette-Equivalents | 5.12<br>(4.19–6.21) |
| Aortic aneurysm | 60 to 64 | Female | 0 Cigarette-Equivalents  | 1.00<br>(1.00–1.00) |

|                 |          |        |                          |                     |
|-----------------|----------|--------|--------------------------|---------------------|
| Aortic aneurysm | 60 to 64 | Female | 1 Cigarette-Equivalents  | 1·20<br>(1·14–1·26) |
| Aortic aneurysm | 60 to 64 | Female | 5 Cigarette-Equivalents  | 2·00<br>(1·71–2·32) |
| Aortic aneurysm | 60 to 64 | Female | 10 Cigarette-Equivalents | 3·00<br>(2·43–3·64) |
| Aortic aneurysm | 60 to 64 | Female | 20 Cigarette-Equivalents | 4·21<br>(3·54–4·98) |
| Aortic aneurysm | 60 to 64 | Female | 30 Cigarette-Equivalents | 5·12<br>(4·19–6·21) |
| Aortic aneurysm | 65 to 69 | Male   | 0 Cigarette-Equivalents  | 1·00<br>(1·00–1·00) |
| Aortic aneurysm | 65 to 69 | Male   | 1 Cigarette-Equivalents  | 1·14<br>(1·11–1·17) |
| Aortic aneurysm | 65 to 69 | Male   | 5 Cigarette-Equivalents  | 1·70<br>(1·53–1·85) |
| Aortic aneurysm | 65 to 69 | Male   | 10 Cigarette-Equivalents | 2·39<br>(2·05–2·70) |
| Aortic aneurysm | 65 to 69 | Male   | 20 Cigarette-Equivalents | 2·97<br>(2·59–3·38) |
| Aortic aneurysm | 65 to 69 | Male   | 30 Cigarette-Equivalents | 3·41<br>(2·92–3·97) |
| Aortic aneurysm | 65 to 69 | Female | 0 Cigarette-Equivalents  | 1·00<br>(1·00–1·00) |
| Aortic aneurysm | 65 to 69 | Female | 1 Cigarette-Equivalents  | 1·14<br>(1·11–1·17) |
| Aortic aneurysm | 65 to 69 | Female | 5 Cigarette-Equivalents  | 1·70<br>(1·53–1·85) |
| Aortic aneurysm | 65 to 69 | Female | 10 Cigarette-Equivalents | 2·39<br>(2·05–2·70) |
| Aortic aneurysm | 65 to 69 | Female | 20 Cigarette-Equivalents | 2·97<br>(2·59–3·38) |
| Aortic aneurysm | 65 to 69 | Female | 30 Cigarette-Equivalents | 3·41<br>(2·92–3·97) |
| Aortic aneurysm | 70 to 74 | Male   | 0 Cigarette-Equivalents  | 1·00<br>(1·00–1·00) |
| Aortic aneurysm | 70 to 74 | Male   | 1 Cigarette-Equivalents  | 1·14<br>(1·11–1·17) |
| Aortic aneurysm | 70 to 74 | Male   | 5 Cigarette-Equivalents  | 1·70<br>(1·53–1·85) |
| Aortic aneurysm | 70 to 74 | Male   | 10 Cigarette-Equivalents | 2·39<br>(2·05–2·70) |
| Aortic aneurysm | 70 to 74 | Male   | 20 Cigarette-Equivalents | 2·97<br>(2·59–3·38) |
| Aortic aneurysm | 70 to 74 | Male   | 30 Cigarette-Equivalents | 3·41<br>(2·92–3·97) |
| Aortic aneurysm | 70 to 74 | Female | 0 Cigarette-Equivalents  | 1·00<br>(1·00–1·00) |
| Aortic aneurysm | 70 to 74 | Female | 1 Cigarette-Equivalents  | 1·14<br>(1·11–1·17) |
| Aortic aneurysm | 70 to 74 | Female | 5 Cigarette-Equivalents  | 1·70<br>(1·53–1·85) |
| Aortic aneurysm | 70 to 74 | Female | 10 Cigarette-Equivalents | 2·39<br>(2·05–2·70) |

|                 |          |        |                          |                     |
|-----------------|----------|--------|--------------------------|---------------------|
| Aortic aneurysm | 70 to 74 | Female | 20 Cigarette-Equivalents | 2.97<br>(2.59–3.38) |
| Aortic aneurysm | 70 to 74 | Female | 30 Cigarette-Equivalents | 3.41<br>(2.92–3.97) |
| Aortic aneurysm | 75 to 79 | Male   | 0 Cigarette-Equivalents  | 1.00<br>(1.00–1.00) |
| Aortic aneurysm | 75 to 79 | Male   | 1 Cigarette-Equivalents  | 1.08<br>(1.07–1.10) |
| Aortic aneurysm | 75 to 79 | Male   | 5 Cigarette-Equivalents  | 1.42<br>(1.33–1.52) |
| Aortic aneurysm | 75 to 79 | Male   | 10 Cigarette-Equivalents | 1.84<br>(1.66–2.04) |
| Aortic aneurysm | 75 to 79 | Male   | 20 Cigarette-Equivalents | 2.06<br>(1.87–2.26) |
| Aortic aneurysm | 75 to 79 | Male   | 30 Cigarette-Equivalents | 2.27<br>(2.00–2.55) |
| Aortic aneurysm | 75 to 79 | Female | 0 Cigarette-Equivalents  | 1.00<br>(1.00–1.00) |
| Aortic aneurysm | 75 to 79 | Female | 1 Cigarette-Equivalents  | 1.08<br>(1.07–1.10) |
| Aortic aneurysm | 75 to 79 | Female | 5 Cigarette-Equivalents  | 1.42<br>(1.33–1.52) |
| Aortic aneurysm | 75 to 79 | Female | 10 Cigarette-Equivalents | 1.84<br>(1.66–2.04) |
| Aortic aneurysm | 75 to 79 | Female | 20 Cigarette-Equivalents | 2.06<br>(1.87–2.26) |
| Aortic aneurysm | 75 to 79 | Female | 30 Cigarette-Equivalents | 2.27<br>(2.00–2.55) |
| Aortic aneurysm | 80 to 84 | Male   | 0 Cigarette-Equivalents  | 1.00<br>(1.00–1.00) |
| Aortic aneurysm | 80 to 84 | Male   | 1 Cigarette-Equivalents  | 1.08<br>(1.07–1.10) |
| Aortic aneurysm | 80 to 84 | Male   | 5 Cigarette-Equivalents  | 1.42<br>(1.33–1.52) |
| Aortic aneurysm | 80 to 84 | Male   | 10 Cigarette-Equivalents | 1.84<br>(1.66–2.04) |
| Aortic aneurysm | 80 to 84 | Male   | 20 Cigarette-Equivalents | 2.06<br>(1.87–2.26) |
| Aortic aneurysm | 80 to 84 | Male   | 30 Cigarette-Equivalents | 2.27<br>(2.00–2.55) |
| Aortic aneurysm | 80 to 84 | Female | 0 Cigarette-Equivalents  | 1.00<br>(1.00–1.00) |
| Aortic aneurysm | 80 to 84 | Female | 1 Cigarette-Equivalents  | 1.08<br>(1.07–1.10) |
| Aortic aneurysm | 80 to 84 | Female | 5 Cigarette-Equivalents  | 1.42<br>(1.33–1.52) |
| Aortic aneurysm | 80 to 84 | Female | 10 Cigarette-Equivalents | 1.84<br>(1.66–2.04) |
| Aortic aneurysm | 80 to 84 | Female | 20 Cigarette-Equivalents | 2.06<br>(1.87–2.26) |
| Aortic aneurysm | 80 to 84 | Female | 30 Cigarette-Equivalents | 2.27<br>(2.00–2.55) |
| Aortic aneurysm | 85 to 89 | Male   | 0 Cigarette-Equivalents  | 1.00<br>(1.00–1.00) |



|                 |          |        |                          |                     |
|-----------------|----------|--------|--------------------------|---------------------|
| Aortic aneurysm | 85 to 89 | Male   | 1 Cigarette-Equivalents  | 1·04<br>(1·03–1·05) |
| Aortic aneurysm | 85 to 89 | Male   | 5 Cigarette-Equivalents  | 1·18<br>(1·14–1·23) |
| Aortic aneurysm | 85 to 89 | Male   | 10 Cigarette-Equivalents | 1·37<br>(1·27–1·47) |
| Aortic aneurysm | 85 to 89 | Male   | 20 Cigarette-Equivalents | 1·41<br>(1·30–1·51) |
| Aortic aneurysm | 85 to 89 | Male   | 30 Cigarette-Equivalents | 1·49<br>(1·36–1·61) |
| Aortic aneurysm | 85 to 89 | Female | 0 Cigarette-Equivalents  | 1·00<br>(1·00–1·00) |
| Aortic aneurysm | 85 to 89 | Female | 1 Cigarette-Equivalents  | 1·04<br>(1·03–1·05) |
| Aortic aneurysm | 85 to 89 | Female | 5 Cigarette-Equivalents  | 1·18<br>(1·14–1·23) |
| Aortic aneurysm | 85 to 89 | Female | 10 Cigarette-Equivalents | 1·37<br>(1·27–1·47) |
| Aortic aneurysm | 85 to 89 | Female | 20 Cigarette-Equivalents | 1·41<br>(1·30–1·51) |
| Aortic aneurysm | 85 to 89 | Female | 30 Cigarette-Equivalents | 1·49<br>(1·36–1·61) |
| Aortic aneurysm | 90 to 94 | Male   | 0 Cigarette-Equivalents  | 1·00<br>(1·00–1·00) |
| Aortic aneurysm | 90 to 94 | Male   | 1 Cigarette-Equivalents  | 1·04<br>(1·03–1·05) |
| Aortic aneurysm | 90 to 94 | Male   | 5 Cigarette-Equivalents  | 1·18<br>(1·14–1·23) |
| Aortic aneurysm | 90 to 94 | Male   | 10 Cigarette-Equivalents | 1·37<br>(1·27–1·47) |
| Aortic aneurysm | 90 to 94 | Male   | 20 Cigarette-Equivalents | 1·41<br>(1·30–1·51) |
| Aortic aneurysm | 90 to 94 | Male   | 30 Cigarette-Equivalents | 1·49<br>(1·36–1·61) |
| Aortic aneurysm | 90 to 94 | Female | 0 Cigarette-Equivalents  | 1·00<br>(1·00–1·00) |
| Aortic aneurysm | 90 to 94 | Female | 1 Cigarette-Equivalents  | 1·04<br>(1·03–1·05) |
| Aortic aneurysm | 90 to 94 | Female | 5 Cigarette-Equivalents  | 1·18<br>(1·14–1·23) |
| Aortic aneurysm | 90 to 94 | Female | 10 Cigarette-Equivalents | 1·37<br>(1·27–1·47) |
| Aortic aneurysm | 90 to 94 | Female | 20 Cigarette-Equivalents | 1·41<br>(1·30–1·51) |
| Aortic aneurysm | 90 to 94 | Female | 30 Cigarette-Equivalents | 1·49<br>(1·36–1·61) |
| Aortic aneurysm | 95 plus  | Male   | 0 Cigarette-Equivalents  | 1·00<br>(1·00–1·00) |
| Aortic aneurysm | 95 plus  | Male   | 1 Cigarette-Equivalents  | 1·00<br>(1·00–1·00) |
| Aortic aneurysm | 95 plus  | Male   | 5 Cigarette-Equivalents  | 1·00<br>(1·00–1·01) |
| Aortic aneurysm | 95 plus  | Male   | 10 Cigarette-Equivalents | 1·00<br>(1·00–1·02) |

|                                             |          |        |                          |                     |
|---------------------------------------------|----------|--------|--------------------------|---------------------|
| Aortic aneurysm                             | 95 plus  | Male   | 20 Cigarette-Equivalents | 1.00<br>(1.00–1.02) |
| Aortic aneurysm                             | 95 plus  | Male   | 30 Cigarette-Equivalents | 1.01<br>(1.00–1.02) |
| Aortic aneurysm                             | 95 plus  | Female | 0 Cigarette-Equivalents  | 1.00<br>(1.00–1.00) |
| Aortic aneurysm                             | 95 plus  | Female | 1 Cigarette-Equivalents  | 1.00<br>(1.00–1.00) |
| Aortic aneurysm                             | 95 plus  | Female | 5 Cigarette-Equivalents  | 1.00<br>(1.00–1.01) |
| Aortic aneurysm                             | 95 plus  | Female | 10 Cigarette-Equivalents | 1.00<br>(1.00–1.02) |
| Aortic aneurysm                             | 95 plus  | Female | 20 Cigarette-Equivalents | 1.00<br>(1.00–1.02) |
| Aortic aneurysm                             | 95 plus  | Female | 30 Cigarette-Equivalents | 1.01<br>(1.00–1.02) |
| Lower extremity peripheral arterial disease | 30 to 34 | Male   | 0 Cigarette-Equivalents  | 1.00<br>(1.00–1.00) |
| Lower extremity peripheral arterial disease | 30 to 34 | Male   | 1 Cigarette-Equivalents  | 1.22<br>(1.11–1.39) |
| Lower extremity peripheral arterial disease | 30 to 34 | Male   | 5 Cigarette-Equivalents  | 2.09<br>(1.53–2.93) |
| Lower extremity peripheral arterial disease | 30 to 34 | Male   | 10 Cigarette-Equivalents | 3.28<br>(2.18–4.87) |
| Lower extremity peripheral arterial disease | 30 to 34 | Male   | 20 Cigarette-Equivalents | 6.77<br>(3.94–10.8) |
| Lower extremity peripheral arterial disease | 30 to 34 | Male   | 30 Cigarette-Equivalents | 9.40<br>(4.71–16.5) |
| Lower extremity peripheral arterial disease | 30 to 34 | Female | 0 Cigarette-Equivalents  | 1.00<br>(1.00–1.00) |
| Lower extremity peripheral arterial disease | 30 to 34 | Female | 1 Cigarette-Equivalents  | 1.22<br>(1.11–1.39) |
| Lower extremity peripheral arterial disease | 30 to 34 | Female | 5 Cigarette-Equivalents  | 2.09<br>(1.53–2.93) |
| Lower extremity peripheral arterial disease | 30 to 34 | Female | 10 Cigarette-Equivalents | 3.28<br>(2.18–4.87) |
| Lower extremity peripheral arterial disease | 30 to 34 | Female | 20 Cigarette-Equivalents | 6.77<br>(3.94–10.8) |
| Lower extremity peripheral arterial disease | 30 to 34 | Female | 30 Cigarette-Equivalents | 9.40<br>(4.71–16.5) |
| Lower extremity peripheral arterial disease | 35 to 39 | Male   | 0 Cigarette-Equivalents  | 1.00<br>(1.00–1.00) |
| Lower extremity peripheral arterial disease | 35 to 39 | Male   | 1 Cigarette-Equivalents  | 1.22<br>(1.11–1.39) |
| Lower extremity peripheral arterial disease | 35 to 39 | Male   | 5 Cigarette-Equivalents  | 2.09<br>(1.53–2.93) |
| Lower extremity peripheral arterial disease | 35 to 39 | Male   | 10 Cigarette-Equivalents | 3.28<br>(2.18–4.87) |
| Lower extremity peripheral arterial disease | 35 to 39 | Male   | 20 Cigarette-Equivalents | 6.77<br>(3.94–10.8) |
| Lower extremity peripheral arterial disease | 35 to 39 | Male   | 30 Cigarette-Equivalents | 9.40<br>(4.71–16.5) |
| Lower extremity peripheral arterial disease | 35 to 39 | Female | 0 Cigarette-Equivalents  | 1.00<br>(1.00–1.00) |

|                                             |          |        |                          |                     |
|---------------------------------------------|----------|--------|--------------------------|---------------------|
| Lower extremity peripheral arterial disease | 35 to 39 | Female | 1 Cigarette-Equivalents  | 1.22<br>(1.11–1.39) |
| Lower extremity peripheral arterial disease | 35 to 39 | Female | 5 Cigarette-Equivalents  | 2.09<br>(1.53–2.93) |
| Lower extremity peripheral arterial disease | 35 to 39 | Female | 10 Cigarette-Equivalents | 3.28<br>(2.18–4.87) |
| Lower extremity peripheral arterial disease | 35 to 39 | Female | 20 Cigarette-Equivalents | 6.77<br>(3.94–10.8) |
| Lower extremity peripheral arterial disease | 35 to 39 | Female | 30 Cigarette-Equivalents | 9.40<br>(4.71–16.5) |
| Lower extremity peripheral arterial disease | 40 to 44 | Male   | 0 Cigarette-Equivalents  | 1.00<br>(1.00–1.00) |
| Lower extremity peripheral arterial disease | 40 to 44 | Male   | 1 Cigarette-Equivalents  | 1.22<br>(1.11–1.39) |
| Lower extremity peripheral arterial disease | 40 to 44 | Male   | 5 Cigarette-Equivalents  | 2.09<br>(1.53–2.93) |
| Lower extremity peripheral arterial disease | 40 to 44 | Male   | 10 Cigarette-Equivalents | 3.28<br>(2.18–4.87) |
| Lower extremity peripheral arterial disease | 40 to 44 | Male   | 20 Cigarette-Equivalents | 6.77<br>(3.94–10.8) |
| Lower extremity peripheral arterial disease | 40 to 44 | Male   | 30 Cigarette-Equivalents | 9.40<br>(4.71–16.5) |
| Lower extremity peripheral arterial disease | 40 to 44 | Female | 0 Cigarette-Equivalents  | 1.00<br>(1.00–1.00) |
| Lower extremity peripheral arterial disease | 40 to 44 | Female | 1 Cigarette-Equivalents  | 1.22<br>(1.11–1.39) |
| Lower extremity peripheral arterial disease | 40 to 44 | Female | 5 Cigarette-Equivalents  | 2.09<br>(1.53–2.93) |
| Lower extremity peripheral arterial disease | 40 to 44 | Female | 10 Cigarette-Equivalents | 3.28<br>(2.18–4.87) |
| Lower extremity peripheral arterial disease | 40 to 44 | Female | 20 Cigarette-Equivalents | 6.77<br>(3.94–10.8) |
| Lower extremity peripheral arterial disease | 40 to 44 | Female | 30 Cigarette-Equivalents | 9.40<br>(4.71–16.5) |
| Lower extremity peripheral arterial disease | 45 to 49 | Male   | 0 Cigarette-Equivalents  | 1.00<br>(1.00–1.00) |
| Lower extremity peripheral arterial disease | 45 to 49 | Male   | 1 Cigarette-Equivalents  | 1.19<br>(1.08–1.35) |
| Lower extremity peripheral arterial disease | 45 to 49 | Male   | 5 Cigarette-Equivalents  | 1.96<br>(1.41–2.74) |
| Lower extremity peripheral arterial disease | 45 to 49 | Male   | 10 Cigarette-Equivalents | 2.98<br>(1.89–4.48) |
| Lower extremity peripheral arterial disease | 45 to 49 | Male   | 20 Cigarette-Equivalents | 5.74<br>(3.25–9.15) |
| Lower extremity peripheral arterial disease | 45 to 49 | Male   | 30 Cigarette-Equivalents | 7.75<br>(3.77–13.9) |
| Lower extremity peripheral arterial disease | 45 to 49 | Female | 0 Cigarette-Equivalents  | 1.00<br>(1.00–1.00) |
| Lower extremity peripheral arterial disease | 45 to 49 | Female | 1 Cigarette-Equivalents  | 1.19<br>(1.08–1.35) |
| Lower extremity peripheral arterial disease | 45 to 49 | Female | 5 Cigarette-Equivalents  | 1.96<br>(1.41–2.74) |
| Lower extremity peripheral arterial disease | 45 to 49 | Female | 10 Cigarette-Equivalents | 2.98<br>(1.89–4.48) |

|                                             |          |        |                          |                     |
|---------------------------------------------|----------|--------|--------------------------|---------------------|
| Lower extremity peripheral arterial disease | 45 to 49 | Female | 20 Cigarette-Equivalents | 5.74<br>(3.25–9.15) |
| Lower extremity peripheral arterial disease | 45 to 49 | Female | 30 Cigarette-Equivalents | 7.75<br>(3.77–13.9) |
| Lower extremity peripheral arterial disease | 50 to 54 | Male   | 0 Cigarette-Equivalents  | 1.00<br>(1.00–1.00) |
| Lower extremity peripheral arterial disease | 50 to 54 | Male   | 1 Cigarette-Equivalents  | 1.19<br>(1.08–1.35) |
| Lower extremity peripheral arterial disease | 50 to 54 | Male   | 5 Cigarette-Equivalents  | 1.96<br>(1.41–2.74) |
| Lower extremity peripheral arterial disease | 50 to 54 | Male   | 10 Cigarette-Equivalents | 2.98<br>(1.89–4.48) |
| Lower extremity peripheral arterial disease | 50 to 54 | Male   | 20 Cigarette-Equivalents | 5.74<br>(3.25–9.15) |
| Lower extremity peripheral arterial disease | 50 to 54 | Male   | 30 Cigarette-Equivalents | 7.75<br>(3.77–13.9) |
| Lower extremity peripheral arterial disease | 50 to 54 | Female | 0 Cigarette-Equivalents  | 1.00<br>(1.00–1.00) |
| Lower extremity peripheral arterial disease | 50 to 54 | Female | 1 Cigarette-Equivalents  | 1.19<br>(1.08–1.35) |
| Lower extremity peripheral arterial disease | 50 to 54 | Female | 5 Cigarette-Equivalents  | 1.96<br>(1.41–2.74) |
| Lower extremity peripheral arterial disease | 50 to 54 | Female | 10 Cigarette-Equivalents | 2.98<br>(1.89–4.48) |
| Lower extremity peripheral arterial disease | 50 to 54 | Female | 20 Cigarette-Equivalents | 5.74<br>(3.25–9.15) |
| Lower extremity peripheral arterial disease | 50 to 54 | Female | 30 Cigarette-Equivalents | 7.75<br>(3.77–13.9) |
| Lower extremity peripheral arterial disease | 55 to 59 | Male   | 0 Cigarette-Equivalents  | 1.00<br>(1.00–1.00) |
| Lower extremity peripheral arterial disease | 55 to 59 | Male   | 1 Cigarette-Equivalents  | 1.22<br>(1.08–1.40) |
| Lower extremity peripheral arterial disease | 55 to 59 | Male   | 5 Cigarette-Equivalents  | 2.12<br>(1.39–3.01) |
| Lower extremity peripheral arterial disease | 55 to 59 | Male   | 10 Cigarette-Equivalents | 3.27<br>(1.82–4.93) |
| Lower extremity peripheral arterial disease | 55 to 59 | Male   | 20 Cigarette-Equivalents | 5.90<br>(2.88–8.81) |
| Lower extremity peripheral arterial disease | 55 to 59 | Male   | 30 Cigarette-Equivalents | 7.32<br>(3.30–11.3) |
| Lower extremity peripheral arterial disease | 55 to 59 | Female | 0 Cigarette-Equivalents  | 1.00<br>(1.00–1.00) |
| Lower extremity peripheral arterial disease | 55 to 59 | Female | 1 Cigarette-Equivalents  | 1.22<br>(1.08–1.40) |
| Lower extremity peripheral arterial disease | 55 to 59 | Female | 5 Cigarette-Equivalents  | 2.12<br>(1.39–3.01) |
| Lower extremity peripheral arterial disease | 55 to 59 | Female | 10 Cigarette-Equivalents | 3.27<br>(1.82–4.93) |
| Lower extremity peripheral arterial disease | 55 to 59 | Female | 20 Cigarette-Equivalents | 5.90<br>(2.88–8.81) |
| Lower extremity peripheral arterial disease | 55 to 59 | Female | 30 Cigarette-Equivalents | 7.32<br>(3.30–11.3) |
| Lower extremity peripheral arterial disease | 60 to 64 | Male   | 0 Cigarette-Equivalents  | 1.00<br>(1.00–1.00) |

|                                             |          |        |                          |                     |
|---------------------------------------------|----------|--------|--------------------------|---------------------|
| Lower extremity peripheral arterial disease | 60 to 64 | Male   | 1 Cigarette-Equivalents  | 1.22<br>(1.08–1.40) |
| Lower extremity peripheral arterial disease | 60 to 64 | Male   | 5 Cigarette-Equivalents  | 2.12<br>(1.39–3.01) |
| Lower extremity peripheral arterial disease | 60 to 64 | Male   | 10 Cigarette-Equivalents | 3.27<br>(1.82–4.93) |
| Lower extremity peripheral arterial disease | 60 to 64 | Male   | 20 Cigarette-Equivalents | 5.90<br>(2.88–8.81) |
| Lower extremity peripheral arterial disease | 60 to 64 | Male   | 30 Cigarette-Equivalents | 7.32<br>(3.30–11.3) |
| Lower extremity peripheral arterial disease | 60 to 64 | Female | 0 Cigarette-Equivalents  | 1.00<br>(1.00–1.00) |
| Lower extremity peripheral arterial disease | 60 to 64 | Female | 1 Cigarette-Equivalents  | 1.22<br>(1.08–1.40) |
| Lower extremity peripheral arterial disease | 60 to 64 | Female | 5 Cigarette-Equivalents  | 2.12<br>(1.39–3.01) |
| Lower extremity peripheral arterial disease | 60 to 64 | Female | 10 Cigarette-Equivalents | 3.27<br>(1.82–4.93) |
| Lower extremity peripheral arterial disease | 60 to 64 | Female | 20 Cigarette-Equivalents | 5.90<br>(2.88–8.81) |
| Lower extremity peripheral arterial disease | 60 to 64 | Female | 30 Cigarette-Equivalents | 7.32<br>(3.30–11.3) |
| Lower extremity peripheral arterial disease | 65 to 69 | Male   | 0 Cigarette-Equivalents  | 1.00<br>(1.00–1.00) |
| Lower extremity peripheral arterial disease | 65 to 69 | Male   | 1 Cigarette-Equivalents  | 1.21<br>(1.13–1.30) |
| Lower extremity peripheral arterial disease | 65 to 69 | Male   | 5 Cigarette-Equivalents  | 2.06<br>(1.63–2.48) |
| Lower extremity peripheral arterial disease | 65 to 69 | Male   | 10 Cigarette-Equivalents | 3.12<br>(2.34–3.83) |
| Lower extremity peripheral arterial disease | 65 to 69 | Male   | 20 Cigarette-Equivalents | 4.91<br>(3.76–5.91) |
| Lower extremity peripheral arterial disease | 65 to 69 | Male   | 30 Cigarette-Equivalents | 5.31<br>(3.98–6.97) |
| Lower extremity peripheral arterial disease | 65 to 69 | Female | 0 Cigarette-Equivalents  | 1.00<br>(1.00–1.00) |
| Lower extremity peripheral arterial disease | 65 to 69 | Female | 1 Cigarette-Equivalents  | 1.21<br>(1.13–1.30) |
| Lower extremity peripheral arterial disease | 65 to 69 | Female | 5 Cigarette-Equivalents  | 2.06<br>(1.63–2.48) |
| Lower extremity peripheral arterial disease | 65 to 69 | Female | 10 Cigarette-Equivalents | 3.12<br>(2.34–3.83) |
| Lower extremity peripheral arterial disease | 65 to 69 | Female | 20 Cigarette-Equivalents | 4.91<br>(3.76–5.91) |
| Lower extremity peripheral arterial disease | 65 to 69 | Female | 30 Cigarette-Equivalents | 5.31<br>(3.98–6.97) |
| Lower extremity peripheral arterial disease | 70 to 74 | Male   | 0 Cigarette-Equivalents  | 1.00<br>(1.00–1.00) |
| Lower extremity peripheral arterial disease | 70 to 74 | Male   | 1 Cigarette-Equivalents  | 1.21<br>(1.13–1.30) |
| Lower extremity peripheral arterial disease | 70 to 74 | Male   | 5 Cigarette-Equivalents  | 2.06<br>(1.63–2.48) |
| Lower extremity peripheral arterial disease | 70 to 74 | Male   | 10 Cigarette-Equivalents | 3.12<br>(2.34–3.83) |

|                                             |          |        |                          |                     |
|---------------------------------------------|----------|--------|--------------------------|---------------------|
| Lower extremity peripheral arterial disease | 70 to 74 | Male   | 20 Cigarette-Equivalents | 4.91<br>(3.76–5.91) |
| Lower extremity peripheral arterial disease | 70 to 74 | Male   | 30 Cigarette-Equivalents | 5.31<br>(3.98–6.97) |
| Lower extremity peripheral arterial disease | 70 to 74 | Female | 0 Cigarette-Equivalents  | 1.00<br>(1.00–1.00) |
| Lower extremity peripheral arterial disease | 70 to 74 | Female | 1 Cigarette-Equivalents  | 1.21<br>(1.13–1.30) |
| Lower extremity peripheral arterial disease | 70 to 74 | Female | 5 Cigarette-Equivalents  | 2.06<br>(1.63–2.48) |
| Lower extremity peripheral arterial disease | 70 to 74 | Female | 10 Cigarette-Equivalents | 3.12<br>(2.34–3.83) |
| Lower extremity peripheral arterial disease | 70 to 74 | Female | 20 Cigarette-Equivalents | 4.91<br>(3.76–5.91) |
| Lower extremity peripheral arterial disease | 70 to 74 | Female | 30 Cigarette-Equivalents | 5.31<br>(3.98–6.97) |
| Lower extremity peripheral arterial disease | 75 to 79 | Male   | 0 Cigarette-Equivalents  | 1.00<br>(1.00–1.00) |
| Lower extremity peripheral arterial disease | 75 to 79 | Male   | 1 Cigarette-Equivalents  | 1.13<br>(1.08–1.18) |
| Lower extremity peripheral arterial disease | 75 to 79 | Male   | 5 Cigarette-Equivalents  | 1.64<br>(1.39–1.88) |
| Lower extremity peripheral arterial disease | 75 to 79 | Male   | 10 Cigarette-Equivalents | 2.26<br>(1.81–2.67) |
| Lower extremity peripheral arterial disease | 75 to 79 | Male   | 20 Cigarette-Equivalents | 2.99<br>(2.50–3.45) |
| Lower extremity peripheral arterial disease | 75 to 79 | Male   | 30 Cigarette-Equivalents | 2.99<br>(2.33–3.83) |
| Lower extremity peripheral arterial disease | 75 to 79 | Female | 0 Cigarette-Equivalents  | 1.00<br>(1.00–1.00) |
| Lower extremity peripheral arterial disease | 75 to 79 | Female | 1 Cigarette-Equivalents  | 1.13<br>(1.08–1.18) |
| Lower extremity peripheral arterial disease | 75 to 79 | Female | 5 Cigarette-Equivalents  | 1.64<br>(1.39–1.88) |
| Lower extremity peripheral arterial disease | 75 to 79 | Female | 10 Cigarette-Equivalents | 2.26<br>(1.81–2.67) |
| Lower extremity peripheral arterial disease | 75 to 79 | Female | 20 Cigarette-Equivalents | 2.99<br>(2.50–3.45) |
| Lower extremity peripheral arterial disease | 75 to 79 | Female | 30 Cigarette-Equivalents | 2.99<br>(2.33–3.83) |
| Lower extremity peripheral arterial disease | 80 to 84 | Male   | 0 Cigarette-Equivalents  | 1.00<br>(1.00–1.00) |
| Lower extremity peripheral arterial disease | 80 to 84 | Male   | 1 Cigarette-Equivalents  | 1.13<br>(1.08–1.18) |
| Lower extremity peripheral arterial disease | 80 to 84 | Male   | 5 Cigarette-Equivalents  | 1.64<br>(1.39–1.88) |
| Lower extremity peripheral arterial disease | 80 to 84 | Male   | 10 Cigarette-Equivalents | 2.26<br>(1.81–2.67) |
| Lower extremity peripheral arterial disease | 80 to 84 | Male   | 20 Cigarette-Equivalents | 2.99<br>(2.50–3.45) |
| Lower extremity peripheral arterial disease | 80 to 84 | Male   | 30 Cigarette-Equivalents | 2.99<br>(2.33–3.83) |
| Lower extremity peripheral arterial disease | 80 to 84 | Female | 0 Cigarette-Equivalents  | 1.00<br>(1.00–1.00) |

|                                             |          |        |                          |                     |
|---------------------------------------------|----------|--------|--------------------------|---------------------|
| Lower extremity peripheral arterial disease | 80 to 84 | Female | 1 Cigarette-Equivalents  | 1·13<br>(1·08–1·18) |
| Lower extremity peripheral arterial disease | 80 to 84 | Female | 5 Cigarette-Equivalents  | 1·64<br>(1·39–1·88) |
| Lower extremity peripheral arterial disease | 80 to 84 | Female | 10 Cigarette-Equivalents | 2·26<br>(1·81–2·67) |
| Lower extremity peripheral arterial disease | 80 to 84 | Female | 20 Cigarette-Equivalents | 2·99<br>(2·50–3·45) |
| Lower extremity peripheral arterial disease | 80 to 84 | Female | 30 Cigarette-Equivalents | 2·99<br>(2·33–3·83) |
| Lower extremity peripheral arterial disease | 85 to 89 | Male   | 0 Cigarette-Equivalents  | 1·00<br>(1·00–1·00) |
| Lower extremity peripheral arterial disease | 85 to 89 | Male   | 1 Cigarette-Equivalents  | 1·06<br>(1·03–1·09) |
| Lower extremity peripheral arterial disease | 85 to 89 | Male   | 5 Cigarette-Equivalents  | 1·29<br>(1·13–1·45) |
| Lower extremity peripheral arterial disease | 85 to 89 | Male   | 10 Cigarette-Equivalents | 1·55<br>(1·27–1·84) |
| Lower extremity peripheral arterial disease | 85 to 89 | Male   | 20 Cigarette-Equivalents | 1·73<br>(1·48–2·01) |
| Lower extremity peripheral arterial disease | 85 to 89 | Male   | 30 Cigarette-Equivalents | 1·71<br>(1·35–2·19) |
| Lower extremity peripheral arterial disease | 85 to 89 | Female | 0 Cigarette-Equivalents  | 1·00<br>(1·00–1·00) |
| Lower extremity peripheral arterial disease | 85 to 89 | Female | 1 Cigarette-Equivalents  | 1·06<br>(1·03–1·09) |
| Lower extremity peripheral arterial disease | 85 to 89 | Female | 5 Cigarette-Equivalents  | 1·29<br>(1·13–1·45) |
| Lower extremity peripheral arterial disease | 85 to 89 | Female | 10 Cigarette-Equivalents | 1·55<br>(1·27–1·84) |
| Lower extremity peripheral arterial disease | 85 to 89 | Female | 20 Cigarette-Equivalents | 1·73<br>(1·48–2·01) |
| Lower extremity peripheral arterial disease | 85 to 89 | Female | 30 Cigarette-Equivalents | 1·71<br>(1·35–2·19) |
| Lower extremity peripheral arterial disease | 90 to 94 | Male   | 0 Cigarette-Equivalents  | 1·00<br>(1·00–1·00) |
| Lower extremity peripheral arterial disease | 90 to 94 | Male   | 1 Cigarette-Equivalents  | 1·06<br>(1·03–1·09) |
| Lower extremity peripheral arterial disease | 90 to 94 | Male   | 5 Cigarette-Equivalents  | 1·29<br>(1·13–1·45) |
| Lower extremity peripheral arterial disease | 90 to 94 | Male   | 10 Cigarette-Equivalents | 1·55<br>(1·27–1·84) |
| Lower extremity peripheral arterial disease | 90 to 94 | Male   | 20 Cigarette-Equivalents | 1·73<br>(1·48–2·01) |
| Lower extremity peripheral arterial disease | 90 to 94 | Male   | 30 Cigarette-Equivalents | 1·71<br>(1·35–2·19) |
| Lower extremity peripheral arterial disease | 90 to 94 | Female | 0 Cigarette-Equivalents  | 1·00<br>(1·00–1·00) |
| Lower extremity peripheral arterial disease | 90 to 94 | Female | 1 Cigarette-Equivalents  | 1·06<br>(1·03–1·09) |
| Lower extremity peripheral arterial disease | 90 to 94 | Female | 5 Cigarette-Equivalents  | 1·29<br>(1·13–1·45) |
| Lower extremity peripheral arterial disease | 90 to 94 | Female | 10 Cigarette-Equivalents | 1·55<br>(1·27–1·84) |

|                                             |          |        |                          |                     |
|---------------------------------------------|----------|--------|--------------------------|---------------------|
| Lower extremity peripheral arterial disease | 90 to 94 | Female | 20 Cigarette-Equivalents | 1.73<br>(1.48–2.01) |
| Lower extremity peripheral arterial disease | 90 to 94 | Female | 30 Cigarette-Equivalents | 1.71<br>(1.35–2.19) |
| Lower extremity peripheral arterial disease | 95 plus  | Male   | 0 Cigarette-Equivalents  | 1.00<br>(1.00–1.00) |
| Lower extremity peripheral arterial disease | 95 plus  | Male   | 1 Cigarette-Equivalents  | 1.00<br>(1.00–1.02) |
| Lower extremity peripheral arterial disease | 95 plus  | Male   | 5 Cigarette-Equivalents  | 1.02<br>(1.00–1.10) |
| Lower extremity peripheral arterial disease | 95 plus  | Male   | 10 Cigarette-Equivalents | 1.04<br>(1.00–1.18) |
| Lower extremity peripheral arterial disease | 95 plus  | Male   | 20 Cigarette-Equivalents | 1.04<br>(1.00–1.16) |
| Lower extremity peripheral arterial disease | 95 plus  | Male   | 30 Cigarette-Equivalents | 1.07<br>(1.00–1.28) |
| Lower extremity peripheral arterial disease | 95 plus  | Female | 0 Cigarette-Equivalents  | 1.00<br>(1.00–1.00) |
| Lower extremity peripheral arterial disease | 95 plus  | Female | 1 Cigarette-Equivalents  | 1.00<br>(1.00–1.02) |
| Lower extremity peripheral arterial disease | 95 plus  | Female | 5 Cigarette-Equivalents  | 1.02<br>(1.00–1.10) |
| Lower extremity peripheral arterial disease | 95 plus  | Female | 10 Cigarette-Equivalents | 1.04<br>(1.00–1.18) |
| Lower extremity peripheral arterial disease | 95 plus  | Female | 20 Cigarette-Equivalents | 1.04<br>(1.00–1.16) |
| Lower extremity peripheral arterial disease | 95 plus  | Female | 30 Cigarette-Equivalents | 1.07<br>(1.00–1.28) |
| Chronic obstructive pulmonary disease       | All Ages | Both   | 0 Pack-Years             | 1.00<br>(1.00–1.00) |
| Chronic obstructive pulmonary disease       | All Ages | Both   | 1 Pack-Years             | 1.26<br>(1.16–1.36) |
| Chronic obstructive pulmonary disease       | All Ages | Both   | 5 Pack-Years             | 2.28<br>(1.81–2.78) |
| Chronic obstructive pulmonary disease       | All Ages | Both   | 10 Pack-Years            | 3.56<br>(2.63–4.56) |
| Chronic obstructive pulmonary disease       | All Ages | Both   | 20 Pack-Years            | 5.79<br>(4.36–7.36) |
| Chronic obstructive pulmonary disease       | All Ages | Both   | 40 Pack-Years            | 7.45<br>(6.18–9.01) |
| Chronic obstructive pulmonary disease       | All Ages | Both   | 60 Pack-Years            | 8.01<br>(4.24–12.7) |
| Asthma                                      | All Ages | Both   | 0 Cigarette-Equivalents  | 1.00<br>(1.00–1.00) |
| Asthma                                      | All Ages | Both   | 1 Cigarette-Equivalents  | 1.09<br>(1.00–1.21) |
| Asthma                                      | All Ages | Both   | 5 Cigarette-Equivalents  | 1.45<br>(1.13–1.77) |
| Asthma                                      | All Ages | Both   | 10 Cigarette-Equivalents | 1.73<br>(1.29–2.14) |
| Asthma                                      | All Ages | Both   | 20 Cigarette-Equivalents | 1.94<br>(1.41–2.66) |
| Asthma                                      | All Ages | Both   | 30 Cigarette-Equivalents | 2.37<br>(1.45–3.85) |



|                                         |          |      |                          |                        |
|-----------------------------------------|----------|------|--------------------------|------------------------|
| Peptic ulcer disease                    | All Ages | Both | 0 Cigarette-Equivalents  | 1.00<br>(1.00–1.00)    |
| Peptic ulcer disease                    | All Ages | Both | 1 Cigarette-Equivalents  | 1.13<br>(1.07–1.18)    |
| Peptic ulcer disease                    | All Ages | Both | 5 Cigarette-Equivalents  | 1.63<br>(1.35–1.92)    |
| Peptic ulcer disease                    | All Ages | Both | 10 Cigarette-Equivalents | 2.00<br>(1.76–2.26)    |
| Peptic ulcer disease                    | All Ages | Both | 20 Cigarette-Equivalents | 2.52<br>(2.09–2.97)    |
| Peptic ulcer disease                    | All Ages | Both | 30 Cigarette-Equivalents | 2.76<br>(2.21–3.42)    |
| Gallbladder and biliary diseases        | All Ages | Both | 0 Cigarette-Equivalents  | 1.00<br>(1.00–1.00)    |
| Gallbladder and biliary diseases        | All Ages | Both | 1 Cigarette-Equivalents  | 1.04<br>(1.02–1.06)    |
| Gallbladder and biliary diseases        | All Ages | Both | 5 Cigarette-Equivalents  | 1.20<br>(1.11–1.30)    |
| Gallbladder and biliary diseases        | All Ages | Both | 10 Cigarette-Equivalents | 1.35<br>(1.21–1.50)    |
| Gallbladder and biliary diseases        | All Ages | Both | 20 Cigarette-Equivalents | 1.33<br>(1.23–1.44)    |
| Gallbladder and biliary diseases        | All Ages | Both | 30 Cigarette-Equivalents | 1.49<br>(1.34–1.65)    |
| Alzheimer's disease and other dementias | All Ages | Both | 0 Cigarette-Equivalents  | 1.00<br>(1.00–1.00)    |
| Alzheimer's disease and other dementias | All Ages | Both | 1 Cigarette-Equivalents  | 1.09<br>(1.03–1.15)    |
| Alzheimer's disease and other dementias | All Ages | Both | 5 Cigarette-Equivalents  | 1.45<br>(1.16–1.77)    |
| Alzheimer's disease and other dementias | All Ages | Both | 10 Cigarette-Equivalents | 1.90<br>(1.33–2.54)    |
| Alzheimer's disease and other dementias | All Ages | Both | 20 Cigarette-Equivalents | 2.65<br>(1.77–3.71)    |
| Alzheimer's disease and other dementias | All Ages | Both | 30 Cigarette-Equivalents | 3.34<br>(2.07–4.88)    |
| Parkinson's disease                     | All Ages | Both | 0 Cigarette-Equivalents  | 1.00<br>(1.00–1.00)    |
| Parkinson's disease                     | All Ages | Both | 1 Cigarette-Equivalents  | 0.978<br>(0.953–0.998) |
| Parkinson's disease                     | All Ages | Both | 5 Cigarette-Equivalents  | 0.890<br>(0.763–0.992) |
| Parkinson's disease                     | All Ages | Both | 10 Cigarette-Equivalents | 0.786<br>(0.626–0.933) |
| Parkinson's disease                     | All Ages | Both | 20 Cigarette-Equivalents | 0.633<br>(0.480–0.808) |
| Parkinson's disease                     | All Ages | Both | 30 Cigarette-Equivalents | 0.520<br>(0.346–0.710) |
| Multiple sclerosis                      | All Ages | Both | 0 Cigarette-Equivalents  | 1.00<br>(1.00–1.00)    |
| Multiple sclerosis                      | All Ages | Both | 1 Cigarette-Equivalents  | 1.07<br>(1.03–1.11)    |
| Multiple sclerosis                      | All Ages | Both | 5 Cigarette-Equivalents  | 1.34<br>(1.14–1.55)    |

|                      |          |      |                          |                     |
|----------------------|----------|------|--------------------------|---------------------|
| Multiple sclerosis   | All Ages | Both | 10 Cigarette-Equivalents | 1.67<br>(1.45–1.92) |
| Multiple sclerosis   | All Ages | Both | 20 Cigarette-Equivalents | 2.01<br>(1.65–2.39) |
| Multiple sclerosis   | All Ages | Both | 30 Cigarette-Equivalents | 2.04<br>(1.58–2.55) |
| Diabetes mellitus    | All Ages | Both | 0 Cigarette-Equivalents  | 1.00<br>(1.00–1.00) |
| Diabetes mellitus    | All Ages | Both | 1 Cigarette-Equivalents  | 1.07<br>(1.03–1.10) |
| Diabetes mellitus    | All Ages | Both | 5 Cigarette-Equivalents  | 1.34<br>(1.16–1.50) |
| Diabetes mellitus    | All Ages | Both | 10 Cigarette-Equivalents | 1.43<br>(1.28–1.61) |
| Diabetes mellitus    | All Ages | Both | 20 Cigarette-Equivalents | 1.64<br>(1.30–1.98) |
| Diabetes mellitus    | All Ages | Both | 30 Cigarette-Equivalents | 1.78<br>(1.42–2.14) |
| Rheumatoid arthritis | All Ages | Both | 0 Cigarette-Equivalents  | 1.00<br>(1.00–1.00) |
| Rheumatoid arthritis | All Ages | Both | 1 Cigarette-Equivalents  | 1.05<br>(1.00–1.13) |
| Rheumatoid arthritis | All Ages | Both | 5 Cigarette-Equivalents  | 1.27<br>(1.00–1.64) |
| Rheumatoid arthritis | All Ages | Both | 10 Cigarette-Equivalents | 1.52<br>(1.07–2.11) |
| Rheumatoid arthritis | All Ages | Both | 20 Cigarette-Equivalents | 1.91<br>(1.18–2.95) |
| Rheumatoid arthritis | All Ages | Both | 30 Cigarette-Equivalents | 2.26<br>(1.15–3.91) |
| Low back pain        | All Ages | Both | 0 Cigarette-Equivalents  | 1.00<br>(1.00–1.00) |
| Low back pain        | All Ages | Both | 1 Cigarette-Equivalents  | 1.13<br>(1.04–1.23) |
| Low back pain        | All Ages | Both | 5 Cigarette-Equivalents  | 1.67<br>(1.39–1.98) |
| Low back pain        | All Ages | Both | 10 Cigarette-Equivalents | 2.16<br>(1.75–2.64) |
| Low back pain        | All Ages | Both | 20 Cigarette-Equivalents | 2.35<br>(1.61–3.31) |
| Low back pain        | All Ages | Both | 30 Cigarette-Equivalents | 2.35<br>(1.61–3.31) |
| Cataract             | All Ages | Both | 0 Cigarette-Equivalents  | 1.00<br>(1.00–1.00) |
| Cataract             | All Ages | Both | 1 Cigarette-Equivalents  | 1.05<br>(1.03–1.07) |
| Cataract             | All Ages | Both | 5 Cigarette-Equivalents  | 1.24<br>(1.16–1.34) |
| Cataract             | All Ages | Both | 10 Cigarette-Equivalents | 1.44<br>(1.30–1.60) |
| Cataract             | All Ages | Both | 20 Cigarette-Equivalents | 1.55<br>(1.43–1.68) |
| Cataract             | All Ages | Both | 30 Cigarette-Equivalents | 1.82<br>(1.49–2.20) |

|                                  |          |      |                          |                     |
|----------------------------------|----------|------|--------------------------|---------------------|
| Age-related macular degeneration | All Ages | Both | 0 Cigarette-Equivalents  | 1·00<br>(1·00–1·00) |
| Age-related macular degeneration | All Ages | Both | 1 Cigarette-Equivalents  | 1·05<br>(1·00–1·10) |
| Age-related macular degeneration | All Ages | Both | 5 Cigarette-Equivalents  | 1·23<br>(1·00–1·51) |
| Age-related macular degeneration | All Ages | Both | 10 Cigarette-Equivalents | 1·45<br>(1·10–1·88) |
| Age-related macular degeneration | All Ages | Both | 20 Cigarette-Equivalents | 1·91<br>(1·33–2·60) |
| Age-related macular degeneration | All Ages | Both | 30 Cigarette-Equivalents | 2·42<br>(1·62–3·35) |
| Fracture                         | All Ages | Both | Prevalence               | 1·85<br>(1·52–2·25) |

Supplemental Figure S1a. Age-standardized smoking prevalence among males ages 15 and above, 2019.

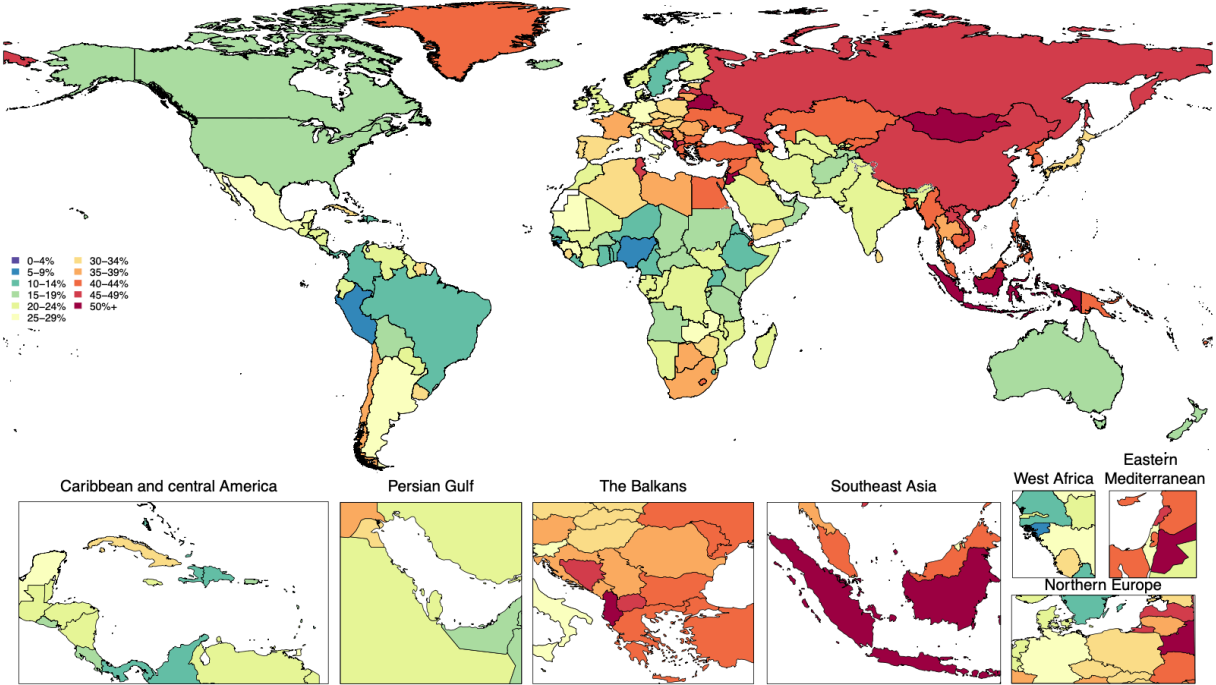

Supplemental Figure S1b. Age-standardized smoking prevalence among females ages 15 and above, 2019.

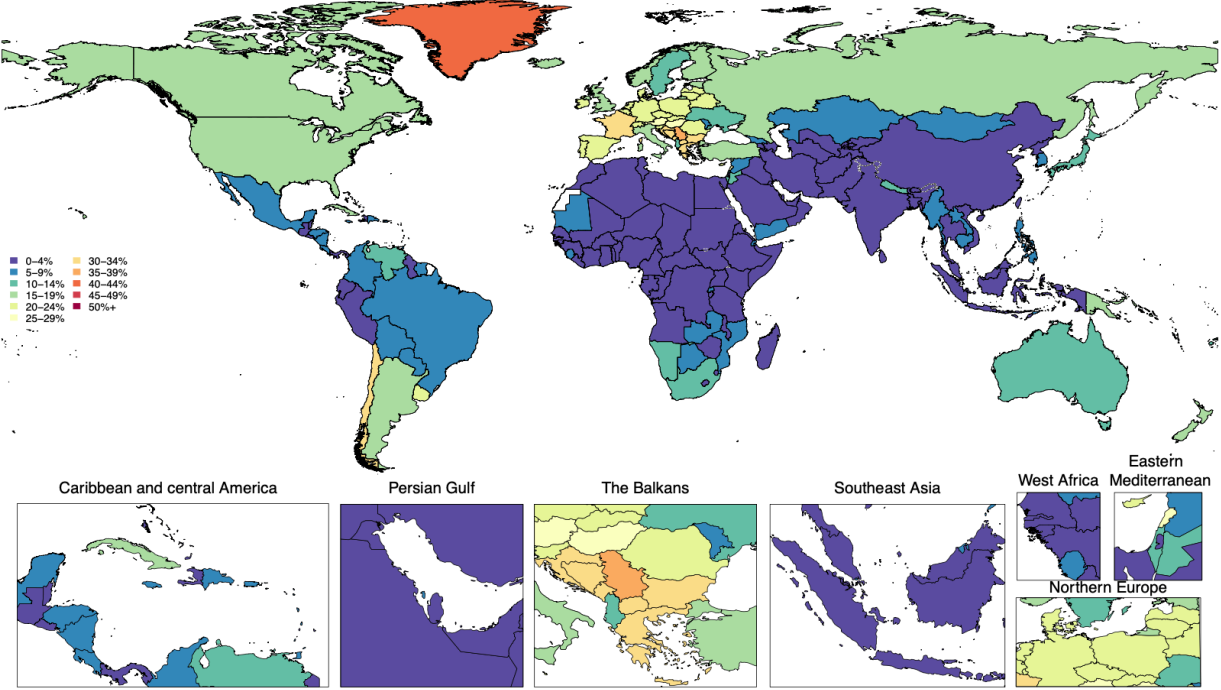

Supplemental Table S2. Number of current smokers (millions), by sex, in 2019, for 204 countries and territories.

| Location                                                    | Number of Smokers<br>Female<br>(Millions) | Number of Smokers<br>Male<br>(Millions) |
|-------------------------------------------------------------|-------------------------------------------|-----------------------------------------|
| <b>Global</b>                                               | <b>194</b><br>(189–200)                   | <b>951</b><br>(939–962)                 |
| <b>Central Europe, Eastern Europe, and<br/>Central Asia</b> | <b>25·6</b><br>(24·5–26·7)                | <b>64·2</b><br>(63·3–65·1)              |
| Central Asia                                                | 1·35<br>(1·22–1·50)                       | 11·5<br>(11·2–11·8)                     |
| Armenia                                                     | 0·0409<br>(0·0325–0·0501)                 | 0·647<br>(0·627–0·667)                  |
| Azerbaijan                                                  | 0·106<br>(0·0800–0·141)                   | 1·77<br>(1·70–1·83)                     |
| Georgia                                                     | 0·0989<br>(0·0843–0·115)                  | 0·712<br>(0·686–0·736)                  |
| Kazakhstan                                                  | 0·547<br>(0·460–0·651)                    | 2·91<br>(2·78–3·03)                     |
| Kyrgyzstan                                                  | 0·110<br>(0·0893–0·134)                   | 0·956<br>(0·913–1·00)                   |
| Mongolia                                                    | 0·105<br>(0·0874–0·126)                   | 0·634<br>(0·607–0·662)                  |
| Tajikistan                                                  | 0·0419<br>(0·0316–0·0553)                 | 0·531<br>(0·488–0·578)                  |
| Turkmenistan                                                | 0·0558<br>(0·0428–0·0714)                 | 0·414<br>(0·379–0·451)                  |
| Uzbekistan                                                  | 0·247<br>(0·187–0·319)                    | 2·95<br>(2·74–3·18)                     |
| Central Europe                                              | 11·5<br>(11·2–11·9)                       | 16·3<br>(16·0–16·6)                     |
| Albania                                                     | 0·133<br>(0·110–0·157)                    | 0·572<br>(0·552–0·591)                  |
| Bosnia and Herzegovina                                      | 0·412<br>(0·362–0·460)                    | 0·617<br>(0·584–0·649)                  |
| Bulgaria                                                    | 0·791<br>(0·721–0·862)                    | 1·14<br>(1·08–1·20)                     |
| Croatia                                                     | 0·545<br>(0·501–0·589)                    | 0·646<br>(0·615–0·676)                  |
| Czechia                                                     | 0·940<br>(0·870–1·02)                     | 1·40<br>(1·34–1·47)                     |
| Hungary                                                     | 0·989<br>(0·892–1·09)                     | 1·27<br>(1·20–1·34)                     |
| Montenegro                                                  | 0·0847<br>(0·0783–0·0914)                 | 0·0962<br>(0·0916–0·101)                |
| North Macedonia                                             | 0·272<br>(0·249–0·296)                    | 0·441<br>(0·422–0·461)                  |
| Poland                                                      | 3·78<br>(3·50–4·07)                       | 4·94<br>(4·74–5·17)                     |
| Romania                                                     | 1·68<br>(1·56–1·82)                       | 2·85<br>(2·73–2·96)                     |
| Serbia                                                      | 1·28<br>(1·16–1·39)                       | 1·35<br>(1·29–1·42)                     |

|                           |                                   |                                |
|---------------------------|-----------------------------------|--------------------------------|
| Slovakia                  | 0.430<br>(0.386–0.478)            | 0.727<br>(0.684–0.771)         |
| Slovenia                  | 0.191<br>(0.174–0.210)            | 0.236<br>(0.223–0.250)         |
| Eastern Europe            | 12.7<br>(11.7–13.7)               | 36.4<br>(35.5–37.2)            |
| Belarus                   | 0.804<br>(0.704–0.909)            | 1.87<br>(1.78–1.96)            |
| Estonia                   | 0.0972<br>(0.0883–0.106)          | 0.160<br>(0.153–0.167)         |
| Latvia                    | 0.151<br>(0.137–0.165)            | 0.335<br>(0.323–0.347)         |
| Lithuania                 | 0.207<br>(0.187–0.229)            | 0.400<br>(0.382–0.420)         |
| Republic of Moldova       | 0.104<br>(0.0856–0.125)           | 0.602<br>(0.570–0.633)         |
| Russian Federation        | 8.96<br>(8.03–9.91)               | 25.9<br>(25.1–26.7)            |
| Ukraine                   | 2.37<br>(2.08–2.69)               | 7.09<br>(6.83–7.34)            |
| <b>High-income</b>        | <b>74.3</b><br><b>(72.1–76.7)</b> | <b>113</b><br><b>(111–115)</b> |
| Australasia               | 1.65<br>(1.46–1.86)               | 1.81<br>(1.69–1.93)            |
| Australia                 | 1.39<br>(1.19–1.60)               | 1.52<br>(1.40–1.64)            |
| New Zealand               | 0.263<br>(0.242–0.286)            | 0.292<br>(0.277–0.308)         |
| High-income Asia Pacific  | 6.34<br>(5.64–7.13)               | 27.5<br>(26.4–28.6)            |
| Brunei Darussalam         | 0.00866<br>(0.00674–0.0110)       | 0.0545<br>(0.0495–0.0599)      |
| Japan                     | 5.06<br>(4.37–5.80)               | 16.9<br>(16.0–17.8)            |
| Republic of Korea         | 1.12<br>(0.907–1.39)              | 10.0<br>(9.48–10.6)            |
| Singapore                 | 0.158<br>(0.125–0.193)            | 0.533<br>(0.488–0.582)         |
| High-income North America | 22.4<br>(20.6–24.3)               | 27.6<br>(26.3–28.9)            |
| Canada                    | 2.33<br>(1.99–2.70)               | 2.59<br>(2.37–2.80)            |
| Greenland                 | 0.00877<br>(0.00758–0.0101)       | 0.0103<br>(0.00955–0.0110)     |
| United States of America  | 20.1<br>(18.3–21.9)               | 25.0<br>(23.7–26.4)            |
| Southern Latin America    | 6.05<br>(5.51–6.56)               | 7.79<br>(7.45–8.14)            |
| Argentina                 | 3.44<br>(3.03–3.86)               | 4.85<br>(4.55–5.15)            |
| Chile                     | 2.31<br>(2.03–2.59)               | 2.55<br>(2.39–2.70)            |
| Uruguay                   | 0.302<br>(0.256–0.349)            | 0.391<br>(0.363–0.420)         |

|                                    |                                   |                                   |
|------------------------------------|-----------------------------------|-----------------------------------|
| Western Europe                     | 37.9<br>(36.8–39.0)               | 47.9<br>(47.1–48.8)               |
| Andorra                            | 0.00791<br>(0.00636–0.00948)      | 0.0114<br>(0.0104–0.0124)         |
| Austria                            | 0.917<br>(0.829–1.01)             | 1.27<br>(1.20–1.34)               |
| Belgium                            | 0.947<br>(0.874–1.02)             | 1.10<br>(1.05–1.15)               |
| Cyprus                             | 0.118<br>(0.104–0.134)            | 0.241<br>(0.230–0.253)            |
| Denmark                            | 0.524<br>(0.482–0.569)            | 0.535<br>(0.506–0.565)            |
| Finland                            | 0.366<br>(0.332–0.405)            | 0.517<br>(0.490–0.546)            |
| France                             | 7.62<br>(7.06–8.21)               | 8.65<br>(8.25–9.04)               |
| Germany                            | 7.45<br>(6.86–8.02)               | 10.1<br>(9.60–10.5)               |
| Greece                             | 1.35<br>(1.24–1.46)               | 1.78<br>(1.71–1.86)               |
| Iceland                            | 0.0200<br>(0.0173–0.0230)         | 0.0217<br>(0.0202–0.0235)         |
| Ireland                            | 0.418<br>(0.377–0.461)            | 0.401<br>(0.372–0.430)            |
| Israel                             | 0.491<br>(0.423–0.565)            | 0.855<br>(0.797–0.916)            |
| Italy                              | 4.54<br>(4.16–4.92)               | 6.32<br>(6.02–6.65)               |
| Luxembourg                         | 0.0498<br>(0.0454–0.0544)         | 0.0659<br>(0.0619–0.0702)         |
| Malta                              | 0.0349<br>(0.0306–0.0393)         | 0.0474<br>(0.0442–0.0506)         |
| Monaco                             | 0.00327<br>(0.00265–0.00397)      | 0.00410<br>(0.00377–0.00445)      |
| Netherlands                        | 1.40<br>(1.29–1.51)               | 1.70<br>(1.61–1.79)               |
| Norway                             | 0.334<br>(0.290–0.383)            | 0.429<br>(0.398–0.464)            |
| Portugal                           | 0.859<br>(0.780–0.935)            | 1.30<br>(1.24–1.36)               |
| San Marino                         | 0.00238<br>(0.00201–0.00284)      | 0.00266<br>(0.00243–0.00289)      |
| Spain                              | 4.22<br>(3.88–4.59)               | 5.53<br>(5.25–5.82)               |
| Sweden                             | 0.581<br>(0.515–0.656)            | 0.510<br>(0.470–0.551)            |
| Switzerland                        | 0.837<br>(0.748–0.930)            | 1.05<br>(0.980–1.11)              |
| United Kingdom                     | 4.82<br>(4.38–5.28)               | 5.54<br>(5.23–5.85)               |
| <b>Latin America and Caribbean</b> | <b>17.4</b><br><b>(16.3–18.4)</b> | <b>36.6</b><br><b>(35.7–37.5)</b> |
| Andean Latin America               | 1.13<br>(0.993–1.28)              | 3.21<br>(3.06–3.36)               |



|                                  |                                 |                              |
|----------------------------------|---------------------------------|------------------------------|
| Bolivia (Plurinational State of) | 0-300<br>(0-242-0-366)          | 0-731<br>(0-670-0-793)       |
| Ecuador                          | 0-320<br>(0-266-0-386)          | 1-55<br>(1-47-1-63)          |
| Peru                             | 0-510<br>(0-408-0-629)          | 0-924<br>(0-826-1-04)        |
| Caribbean                        | 1-54<br>(1-38-1-70)             | 3-33<br>(3-20-3-47)          |
| Antigua and Barbuda              | 0-00206<br>(0-00158-0-00263)    | 0-00446<br>(0-00396-0-00501) |
| Bahamas                          | 0-00489<br>(0-00385-0-00617)    | 0-0167<br>(0-0152-0-0183)    |
| Barbados                         | 0-00498<br>(0-00389-0-00628)    | 0-0157<br>(0-0142-0-0173)    |
| Belize                           | 0-00637<br>(0-00484-0-00816)    | 0-0320<br>(0-0290-0-0352)    |
| Bermuda                          | 0-00225<br>(0-00184-0-00274)    | 0-00465<br>(0-00425-0-00511) |
| Cuba                             | 0-767<br>(0-630-0-915)          | 1-58<br>(1-45-1-70)          |
| Dominica                         | 0-00159<br>(0-00123-0-00202)    | 0-00406<br>(0-00362-0-00452) |
| Dominican Republic               | 0-347<br>(0-288-0-408)          | 0-518<br>(0-475-0-567)       |
| Grenada                          | 0-00211<br>(0-00164-0-00268)    | 0-00749<br>(0-00673-0-00830) |
| Guyana                           | 0-0122<br>(0-00956-0-0152)      | 0-0707<br>(0-0659-0-0760)    |
| Haiti                            | 0-118<br>(0-0907-0-153)         | 0-395<br>(0-358-0-431)       |
| Jamaica                          | 0-0745<br>(0-0622-0-0888)       | 0-218<br>(0-200-0-236)       |
| Puerto Rico                      | 0-125<br>(0-110-0-143)          | 0-207<br>(0-194-0-222)       |
| Saint Kitts and Nevis            | 0-000706<br>(0-000534-0-000915) | 0-00261<br>(0-00231-0-00292) |
| Saint Lucia                      | 0-00368<br>(0-00290-0-00448)    | 0-0138<br>(0-0126-0-0152)    |
| Saint Vincent and the Grenadines | 0-00177<br>(0-00136-0-00228)    | 0-00909<br>(0-00832-0-00987) |
| Suriname                         | 0-0195<br>(0-0156-0-0242)       | 0-0730<br>(0-0679-0-0782)    |
| Trinidad and Tobago              | 0-0431<br>(0-0343-0-0529)       | 0-160<br>(0-148-0-174)       |
| United States Virgin Islands     | 0-00228<br>(0-00183-0-00281)    | 0-00328<br>(0-00294-0-00365) |
| Central Latin America            | 8-41<br>(7-75-9-16)             | 20-4<br>(19-8-21-1)          |
| Colombia                         | 1-86<br>(1-61-2-14)             | 2-63<br>(2-42-2-84)          |
| Costa Rica                       | 0-136<br>(0-113-0-163)          | 0-270<br>(0-249-0-293)       |
| El Salvador                      | 0-0915<br>(0-0724-0-114)        | 0-363<br>(0-330-0-397)       |

|                                     |                             |                             |
|-------------------------------------|-----------------------------|-----------------------------|
| Guatemala                           | 0-283<br>(0-219-0-358)      | 1-23<br>(1-13-1-33)         |
| Honduras                            | 0-179<br>(0-141-0-225)      | 0-757<br>(0-695-0-818)      |
| Mexico                              | 4-37<br>(3-77-4-99)         | 12-2<br>(11-6-12-7)         |
| Nicaragua                           | 0-133<br>(0-101-0-172)      | 0-486<br>(0-437-0-540)      |
| Panama                              | 0-0687<br>(0-0537-0-0860)   | 0-188<br>(0-171-0-208)      |
| Venezuela (Bolivarian Republic of)  | 1-30<br>(1-03-1-60)         | 2-35<br>(2-11-2-59)         |
| Tropical Latin America              | 6-30<br>(5-56-7-04)         | 9-60<br>(9-01-10-2)         |
| Brazil                              | 6-10<br>(5-36-6-83)         | 9-00<br>(8-41-9-59)         |
| Paraguay                            | 0-199<br>(0-163-0-245)      | 0-598<br>(0-548-0-650)      |
| <b>North Africa and Middle East</b> | <b>12-1<br/>(11-3-12-9)</b> | <b>75-4<br/>(74-3-76-6)</b> |
| North Africa and Middle East        | 12-1<br>(11-3-12-9)         | 75-4<br>(74-3-76-6)         |
| Afghanistan                         | 0-290<br>(0-222-0-377)      | 1-97<br>(1-80-2-15)         |
| Algeria                             | 0-259<br>(0-199-0-335)      | 5-08<br>(4-74-5-40)         |
| Bahrain                             | 0-0218<br>(0-0174-0-0275)   | 0-183<br>(0-163-0-203)      |
| Egypt                               | 0-341<br>(0-252-0-458)      | 15-0<br>(14-6-15-5)         |
| Iran (Islamic Republic of)          | 1-55<br>(1-24-1-92)         | 8-66<br>(8-05-9-24)         |
| Iraq                                | 0-461<br>(0-359-0-587)      | 5-40<br>(5-04-5-72)         |
| Jordan                              | 0-450<br>(0-380-0-529)      | 2-37<br>(2-29-2-44)         |
| Kuwait                              | 0-0710<br>(0-0549-0-0898)   | 0-697<br>(0-646-0-747)      |
| Lebanon                             | 0-527<br>(0-462-0-592)      | 0-849<br>(0-808-0-891)      |
| Libya                               | 0-0377<br>(0-0280-0-0500)   | 1-11<br>(1-04-1-18)         |
| Morocco                             | 0-144<br>(0-107-0-192)      | 3-06<br>(2-83-3-28)         |
| Oman                                | 0-0205<br>(0-0154-0-0274)   | 0-427<br>(0-385-0-479)      |
| Palestine                           | 0-0574<br>(0-0439-0-0728)   | 0-640<br>(0-601-0-682)      |
| Qatar                               | 0-0148<br>(0-0112-0-0193)   | 0-448<br>(0-412-0-495)      |
| Saudi Arabia                        | 0-245<br>(0-185-0-315)      | 4-35<br>(4-05-4-64)         |
| Sudan                               | 0-250<br>(0-182-0-335)      | 2-44<br>(2-24-2-66)         |

|                                               |                                   |                                 |
|-----------------------------------------------|-----------------------------------|---------------------------------|
| Syrian Arab Republic                          | 0.356<br>(0.273–0.466)            | 2.02<br>(1.87–2.17)             |
| Tunisia                                       | 0.123<br>(0.0964–0.157)           | 2.02<br>(1.93–2.12)             |
| Turkey                                        | 5.95<br>(5.37–6.58)               | 14.6<br>(14.0–15.1)             |
| United Arab Emirates                          | 0.0843<br>(0.0613–0.115)          | 1.25<br>(1.12–1.38)             |
| Yemen                                         | 0.791<br>(0.646–0.958)            | 2.87<br>(2.64–3.09)             |
| <b>South Asia</b>                             | <b>19.8<br/>(17.1–23.0)</b>       | <b>160<br/>(153–166)</b>        |
| South Asia                                    | 19.8<br>(17.1–23.0)               | 160<br>(153–166)                |
| Bangladesh                                    | 1.16<br>(0.914–1.45)              | 25.0<br>(23.9–26.2)             |
| Bhutan                                        | 0.0130<br>(0.0102–0.0165)         | 0.0438<br>(0.0396–0.0482)       |
| India                                         | 14.9<br>(12.3–18.0)               | 116<br>(109–122)                |
| Nepal                                         | 1.35<br>(1.18–1.55)               | 2.93<br>(2.77–3.07)             |
| Pakistan                                      | 2.39<br>(1.89–2.95)               | 15.7<br>(14.7–16.7)             |
| <b>Southeast Asia, East Asia, and Oceania</b> | <b>36.4<br/>(32.3–41.0)</b>       | <b>452<br/>(443–460)</b>        |
| East Asia                                     | 24.2<br>(20.2–28.8)               | 327<br>(319–335)                |
| China                                         | 23.2<br>(19.2–27.8)               | 318<br>(310–326)                |
| Democratic People's Republic of Korea         | 0.509<br>(0.405–0.640)            | 4.85<br>(4.60–5.08)             |
| Taiwan (Province of China)                    | 0.483<br>(0.383–0.596)            | 4.13<br>(3.91–4.35)             |
| Oceania                                       | 0.746<br>(0.654–0.845)            | 1.81<br>(1.72–1.90)             |
| American Samoa                                | 0.00444<br>(0.00362–0.00541)      | 0.00816<br>(0.00756–0.00878)    |
| Cook Islands                                  | 0.00166<br>(0.00141–0.00195)      | 0.00236<br>(0.00221–0.00250)    |
| Fiji                                          | 0.0477<br>(0.0395–0.0571)         | 0.144<br>(0.136–0.154)          |
| Guam                                          | 0.0119<br>(0.0106–0.0133)         | 0.0196<br>(0.0184–0.0207)       |
| Kiribati                                      | 0.0141<br>(0.0126–0.0155)         | 0.0239<br>(0.0230–0.0247)       |
| Marshall Islands                              | 0.00195<br>(0.00155–0.00243)      | 0.00739<br>(0.00682–0.00796)    |
| Micronesia (Federated States of)              | 0.0133<br>(0.0113–0.0151)         | 0.0233<br>(0.0223–0.0243)       |
| Nauru                                         | 0.00146<br>(0.00130–0.00164)      | 0.00153<br>(0.00144–0.00163)    |
| Niue                                          | 0.0000949<br>(0.0000788–0.000112) | 0.000168<br>(0.000156–0.000181) |

|                                  |                                    |                                 |
|----------------------------------|------------------------------------|---------------------------------|
| Northern Mariana Islands         | 0-00312<br>(0-00246-0-00393)       | 0-00749<br>(0-00692-0-00809)    |
| Palau                            | 0-000780<br>(0-000667-0-000903)    | 0-00264<br>(0-00248-0-00280)    |
| Papua New Guinea                 | 0-585<br>(0-495-0-685)             | 1-38<br>(1-30-1-47)             |
| Samoa                            | 0-00952<br>(0-00821-0-0110)        | 0-0274<br>(0-0258-0-0289)       |
| Solomon Islands                  | 0-0399<br>(0-0348-0-0451)          | 0-106<br>(0-101-0-111)          |
| Tokelau                          | 0-0000772<br>(0-0000606-0-0000961) | 0-000189<br>(0-000174-0-000203) |
| Tonga                            | 0-00457<br>(0-00388-0-00530)       | 0-0134<br>(0-0127-0-0142)       |
| Tuvalu                           | 0-000839<br>(0-000708-0-000986)    | 0-00200<br>(0-00188-0-00212)    |
| Vanuatu                          | 0-00585<br>(0-00451-0-00731)       | 0-0363<br>(0-0341-0-0385)       |
| Southeast Asia                   | 11-5<br>(10-7-12-4)                | 123<br>(121-125)                |
| Cambodia                         | 0-295<br>(0-240-0-356)             | 2-08<br>(1-97-2-18)             |
| Indonesia                        | 3-46<br>(2-86-4-18)                | 58-0<br>(56-6-59-2)             |
| Lao People's Democratic Republic | 0-162<br>(0-131-0-195)             | 1-17<br>(1-11-1-23)             |
| Malaysia                         | 0-361<br>(0-287-0-446)             | 5-08<br>(4-81-5-35)             |
| Maldives                         | 0-0103<br>(0-00813-0-0128)         | 0-120<br>(0-112-0-128)          |
| Mauritius                        | 0-0273<br>(0-0222-0-0334)          | 0-215<br>(0-205-0-226)          |
| Myanmar                          | 1-77<br>(1-48-2-06)                | 7-69<br>(7-34-8-03)             |
| Philippines                      | 3-03<br>(2-64-3-46)                | 16-1<br>(15-4-16-7)             |
| Seychelles                       | 0-00257<br>(0-00206-0-00313)       | 0-0171<br>(0-0159-0-0182)       |
| Sri Lanka                        | 0-161<br>(0-125-0-202)             | 2-43<br>(2-30-2-56)             |
| Thailand                         | 1-13<br>(0-934-1-36)               | 11-6<br>(11-2-12-0)             |
| Timor-Leste                      | 0-0200<br>(0-0160-0-0244)          | 0-263<br>(0-254-0-272)          |
| Viet Nam                         | 1-07<br>(0-849-1-33)               | 18-1<br>(17-5-18-8)             |
| <b>Sub-Saharan Africa</b>        | <b>8-74<br/>(8-23-9-27)</b>        | <b>50-4<br/>(49-4-51-4)</b>     |
| Central Sub-Saharan Africa       | 0-601<br>(0-502-0-712)             | 7-29<br>(6-86-7-77)             |
| Angola                           | 0-208<br>(0-161-0-267)             | 1-31<br>(1-20-1-43)             |
| Central African Republic         | 0-0243<br>(0-0178-0-0327)          | 0-219<br>(0-193-0-247)          |

|                                  |                              |                           |
|----------------------------------|------------------------------|---------------------------|
| Congo                            | 0-0312<br>(0-0227-0-0434)    | 0-341<br>(0-311-0-375)    |
| Democratic Republic of the Congo | 0-302<br>(0-223-0-397)       | 5-17<br>(4-75-5-62)       |
| Equatorial Guinea                | 0-0116<br>(0-00783-0-0173)   | 0-126<br>(0-112-0-139)    |
| Gabon                            | 0-0234<br>(0-0176-0-0305)    | 0-128<br>(0-118-0-139)    |
| Eastern Sub-Saharan Africa       | 3-32<br>(3-07-3-61)          | 18-4<br>(17-9-18-9)       |
| Burundi                          | 0-119<br>(0-0940-0-150)      | 0-478<br>(0-441-0-521)    |
| Comoros                          | 0-00738<br>(0-00555-0-00943) | 0-0543<br>(0-0501-0-0586) |
| Djibouti                         | 0-0196<br>(0-0151-0-0251)    | 0-173<br>(0-161-0-184)    |
| Eritrea                          | 0-0145<br>(0-0105-0-0199)    | 0-255<br>(0-226-0-288)    |
| Ethiopia                         | 0-370<br>(0-278-0-492)       | 2-83<br>(2-58-3-10)       |
| Kenya                            | 0-371<br>(0-288-0-483)       | 2-72<br>(2-52-2-93)       |
| Madagascar                       | 0-211<br>(0-160-0-278)       | 2-05<br>(1-87-2-23)       |
| Malawi                           | 0-145<br>(0-113-0-185)       | 1-02<br>(0-951-1-09)      |
| Mozambique                       | 0-467<br>(0-361-0-595)       | 1-56<br>(1-41-1-73)       |
| Rwanda                           | 0-255<br>(0-209-0-305)       | 0-658<br>(0-610-0-710)    |
| Somalia                          | 0-134<br>(0-0996-0-177)      | 1-02<br>(0-891-1-14)      |
| South Sudan                      | 0-0629<br>(0-0470-0-0812)    | 0-469<br>(0-419-0-523)    |
| Uganda                           | 0-413<br>(0-326-0-525)       | 1-35<br>(1-24-1-46)       |
| United Republic of Tanzania      | 0-446<br>(0-347-0-560)       | 2-48<br>(2-30-2-66)       |
| Zambia                           | 0-284<br>(0-224-0-360)       | 1-27<br>(1-20-1-35)       |
| Southern Sub-Saharan Africa      | 2-48<br>(2-12-2-88)          | 9-39<br>(9-02-9-74)       |
| Botswana                         | 0-0684<br>(0-0566-0-0802)    | 0-295<br>(0-277-0-312)    |
| Eswatini                         | 0-00917<br>(0-00723-0-0118)  | 0-0513<br>(0-0462-0-0570) |
| Lesotho                          | 0-0116<br>(0-00886-0-0152)   | 0-299<br>(0-283-0-314)    |
| Namibia                          | 0-0787<br>(0-0647-0-0944)    | 0-167<br>(0-155-0-180)    |
| South Africa                     | 2-17<br>(1-82-2-56)          | 7-25<br>(6-90-7-56)       |
| Zimbabwe                         | 0-141<br>(0-109-0-179)       | 1-32<br>(1-25-1-40)       |

|                            |                                |                              |
|----------------------------|--------------------------------|------------------------------|
| Western Sub-Saharan Africa | 2.34<br>(2.11–2.59)            | 15.4<br>(14.8–15.9)          |
| Benin                      | 0.0565<br>(0.0423–0.0726)      | 0.318<br>(0.287–0.349)       |
| Burkina Faso               | 0.101<br>(0.0747–0.137)        | 1.03<br>(0.940–1.12)         |
| Cabo Verde                 | 0.00588<br>(0.00460–0.00753)   | 0.0195<br>(0.0173–0.0219)    |
| Cameroon                   | 0.128<br>(0.0938–0.169)        | 1.19<br>(1.07–1.31)          |
| Chad                       | 0.115<br>(0.0860–0.157)        | 0.599<br>(0.541–0.659)       |
| Côte d'Ivoire              | 0.271<br>(0.202–0.358)         | 1.89<br>(1.73–2.07)          |
| Gambia                     | 0.00898<br>(0.00652–0.0124)    | 0.151<br>(0.139–0.163)       |
| Ghana                      | 0.219<br>(0.163–0.295)         | 0.921<br>(0.818–1.03)        |
| Guinea                     | 0.0694<br>(0.0510–0.0908)      | 0.920<br>(0.836–1.01)        |
| Guinea-Bissau              | 0.00584<br>(0.00422–0.00775)   | 0.0437<br>(0.0378–0.0500)    |
| Liberia                    | 0.0381<br>(0.0288–0.0495)      | 0.191<br>(0.174–0.210)       |
| Mali                       | 0.114<br>(0.0844–0.149)        | 1.23<br>(1.13–1.33)          |
| Mauritania                 | 0.111<br>(0.0864–0.140)        | 0.351<br>(0.320–0.382)       |
| Niger                      | 0.104<br>(0.0751–0.144)        | 0.823<br>(0.735–0.918)       |
| Nigeria                    | 0.664<br>(0.489–0.892)         | 4.05<br>(3.61–4.51)          |
| São Tomé and Príncipe      | 0.000945<br>(0.000724–0.00122) | 0.00480<br>(0.00429–0.00539) |
| Senegal                    | 0.0697<br>(0.0520–0.0913)      | 0.638<br>(0.589–0.694)       |
| Sierra Leone               | 0.204<br>(0.162–0.255)         | 0.716<br>(0.671–0.767)       |
| Togo                       | 0.0497<br>(0.0380–0.0640)      | 0.299<br>(0.272–0.328)       |

**Supplemental Table S3.** Relative percent change in number of smokers and age-standardized smoking prevalence, between 1990 and 2019, for 204 countries and territories.

| Location                                                | Percent Change in Number of Smokers, 1990-2019 | Percent Change in Age-Standardized Smoking Prevalence, 1990-2019 |
|---------------------------------------------------------|------------------------------------------------|------------------------------------------------------------------|
| <b>Global</b>                                           | <b>15.4</b><br>(13.8–16.9)                     | <b>-29.6</b><br>(-30.5–28.6)                                     |
| <b>Central Europe, Eastern Europe, and Central Asia</b> | <b>-11.1</b><br>(-12.9–8.88)                   | <b>-16.6</b><br>(-18.4–14.6)                                     |
| Central Asia                                            | 39.6<br>(34.9–44.1)                            | -11.0<br>(-13.9–8.34)                                            |
| Armenia                                                 | -7.62<br>(-12.7–2.59)                          | -8.48<br>(-13.4–3.68)                                            |
| Azerbaijan                                              | 74.9<br>(62.3–88.6)                            | 3.06<br>(-3.92–10.7)                                             |
| Georgia                                                 | -26.0<br>(-30.9–20.8)                          | 9.15<br>(1.98–16.8)                                              |
| Kazakhstan                                              | 6.31<br>(-0.478–13.5)                          | -12.4<br>(-17.8–6.50)                                            |
| Kyrgyzstan                                              | 59.8<br>(50.2–70.5)                            | -1.67<br>(-7.30–4.20)                                            |
| Mongolia                                                | 130<br>(114–148)                               | 12.3<br>(5.41–20.1)                                              |
| Tajikistan                                              | 20.7<br>(6.38–35.8)                            | -45.1<br>(-50.9–39.0)                                            |
| Turkmenistan                                            | -3.89<br>(-14.1–7.78)                          | -43.0<br>(-48.8–36.7)                                            |
| Uzbekistan                                              | 191<br>(154–230)                               | 37.0<br>(20.6–53.4)                                              |
| Central Europe                                          | -20.4<br>(-22.3–18.5)                          | -18.3<br>(-20.3–16.2)                                            |
| Albania                                                 | 34.9<br>(23.8–46.5)                            | 30.7<br>(20.4–41.0)                                              |
| Bosnia and Herzegovina                                  | -2.21<br>(-10.7–7.52)                          | 25.9<br>(14.9–38.0)                                              |
| Bulgaria                                                | -36.0<br>(-41.0–30.8)                          | -18.5<br>(-25.0–11.7)                                            |
| Croatia                                                 | -25.9<br>(-31.0–20.5)                          | -14.6<br>(-20.6–8.48)                                            |
| Czechia                                                 | -18.4<br>(-23.7–12.9)                          | -20.7<br>(-26.1–15.2)                                            |
| Hungary                                                 | -24.3<br>(-29.4–19.1)                          | -20.1<br>(-25.7–14.2)                                            |
| Montenegro                                              | 5.45<br>(-3.91–15.4)                           | -4.46<br>(-12.8–4.30)                                            |
| North Macedonia                                         | 21.3<br>(11.1–32.1)                            | 0.616<br>(-7.93–9.66)                                            |
| Poland                                                  | -25.5<br>(-29.1–21.9)                          | -31.8<br>(-34.9–28.4)                                            |

|                           |                                |                                |
|---------------------------|--------------------------------|--------------------------------|
| Romania                   | -24.4<br>(-29.6--19.6)         | -9.82<br>(-15.8--4.16)         |
| Serbia                    | -1.55<br>(-9.43--6.52)         | 5.15<br>(-3.40--13.9)          |
| Slovakia                  | -12.0<br>(-19.9--3.33)         | -19.9<br>(-27.3--12.1)         |
| Slovenia                  | -0.404<br>(-10.3--9.60)        | -2.63<br>(-12.1--7.22)         |
| Eastern Europe            | -13.5<br>(-16.5--10.1)         | -11.5<br>(-14.7--7.89)         |
| Belarus                   | -0.832<br>(-9.16--7.88)        | 4.98<br>(-4.07--14.4)          |
| Estonia                   | -32.8<br>(-36.3--28.6)         | -21.9<br>(-26.5--17.1)         |
| Latvia                    | -34.5<br>(-38.9--30.2)         | -8.59<br>(-14.5--2.39)         |
| Lithuania                 | -27.7<br>(-32.2--23.0)         | -5.28<br>(-11.6--1.21)         |
| Republic of Moldova       | -1.02<br>(-9.29--8.09)         | 7.55<br>(-1.49--17.5)          |
| Russian Federation        | -6.56<br>(-11.0--1.60)         | -8.96<br>(-13.4--4.05)         |
| Ukraine                   | -32.5<br>(-36.6--28.3)         | -22.9<br>(-27.8--17.8)         |
| <b>High-income</b>        | <b>-17.6<br/>(-18.9--16.2)</b> | <b>-30.6<br/>(-31.8--29.4)</b> |
| Australasia               | -23.4<br>(-28.6--17.9)         | -46.3<br>(-50.1--42.4)         |
| Australia                 | -23.4<br>(-29.6--16.8)         | -47.5<br>(-51.8--43.1)         |
| New Zealand               | -23.7<br>(-27.5--19.8)         | -40.2<br>(-43.1--37.0)         |
| High-income Asia Pacific  | -27.7<br>(-30.5--24.7)         | -33.8<br>(-36.4--30.8)         |
| Brunei Darussalam         | 34.2<br>(20.1--50.1)           | -34.0<br>(-40.3--26.2)         |
| Japan                     | -38.4<br>(-41.6--35.1)         | -37.5<br>(-41.2--33.7)         |
| Republic of Korea         | 4.65<br>(-2.84--13.1)          | -21.6<br>(-26.9--15.3)         |
| Singapore                 | 37.1<br>(20.9--54.8)           | -30.9<br>(-38.8--22.0)         |
| High-income North America | -15.1<br>(-19.0--11.0)         | -35.5<br>(-38.5--32.5)         |
| Canada                    | -29.7<br>(-35.6--23.3)         | -47.4<br>(-52.0--42.4)         |
| Greenland                 | -7.19<br>(-16.3--2.37)         | -8.45<br>(-16.9--0.357)        |
| United States of America  | -13.1<br>(-17.4--8.62)         | -33.9<br>(-37.1--30.4)         |
| Southern Latin America    | 19.6<br>(11.3--28.9)           | -18.4<br>(-24.1--12.1)         |
| Argentina                 | 19.6<br>(7.31--33.9)           | -19.7<br>(-27.9--10.2)         |



|                |                          |                        |
|----------------|--------------------------|------------------------|
| Chile          | 25.7<br>(13.5–39.0)      | -12.8<br>(-21.1–-3.29) |
| Uruguay        | -9.24<br>(-17.4–0.0904)  | -21.0<br>(-28.6–-12.8) |
| Western Europe | -18.3<br>(-19.7–-16.8)   | -26.5<br>(-27.8–-25.1) |
| Andorra        | 14.6<br>(2.05–28.3)      | -23.6<br>(-31.8–-14.1) |
| Austria        | 1.32<br>(-4.47–7.77)     | -12.0<br>(-17.3–-6.21) |
| Belgium        | -26.4<br>(-30.3–-22.4)   | -34.6<br>(-38.3–-30.9) |
| Cyprus         | 72.7<br>(56.4–88.7)      | -8.10<br>(-17.0–0.219) |
| Denmark        | -43.6<br>(-46.4–-40.8)   | -49.3<br>(-52.2–-46.4) |
| Finland        | -24.9<br>(-29.4–-20.4)   | -29.0<br>(-33.6–-24.5) |
| France         | -1.82<br>(-6.13–2.71)    | -10.3<br>(-14.3–-5.95) |
| Germany        | -16.4<br>(-20.3–-12.2)   | -18.9<br>(-23.0–-14.9) |
| Greece         | -8.80<br>(-12.9–-4.56)   | -11.4<br>(-15.3–-7.30) |
| Iceland        | -28.2<br>(-34.6–-20.8)   | -49.7<br>(-54.1–-44.5) |
| Ireland        | -6.02<br>(-11.9–-0.0343) | -33.6<br>(-38.1–-29.2) |
| Israel         | 23.2<br>(11.5–36.1)      | -35.8<br>(-42.2–-29.1) |
| Italy          | -27.6<br>(-31.2–-23.6)   | -29.1<br>(-32.8–-25.3) |
| Luxembourg     | 11.0<br>(3.41–18.6)      | -29.8<br>(-34.6–-24.7) |
| Malta          | -13.5<br>(-20.6–-5.46)   | -27.6<br>(-34.0–-20.7) |
| Monaco         | -9.45<br>(-20.6–2.25)    | -22.5<br>(-32.4–-12.0) |
| Netherlands    | -37.0<br>(-40.1–-33.9)   | -44.3<br>(-47.2–-41.3) |
| Norway         | -41.1<br>(-46.2–-35.8)   | -53.5<br>(-57.6–-49.1) |
| Portugal       | -1.03<br>(-6.39–4.34)    | -3.46<br>(-8.97–1.93)  |
| San Marino     | -15.1<br>(-25.5–-3.45)   | -38.9<br>(-46.6–-30.1) |
| Spain          | -19.5<br>(-23.3–-15.1)   | -32.9<br>(-36.2–-29.3) |
| Sweden         | -33.6<br>(-39.2–-27.2)   | -45.9<br>(-50.8–-40.2) |
| Switzerland    | 1.19<br>(-5.08–7.64)     | -21.2<br>(-26.3–-15.9) |
| United Kingdom | -29.4<br>(-33.2–-25.4)   | -38.8<br>(-42.1–-35.2) |

| <b>Latin America and Caribbean</b> | <b>-19.8<br/>(-22.5--16.9)</b> | <b>-55.0<br/>(-56.5--53.4)</b> |
|------------------------------------|--------------------------------|--------------------------------|
| Andean Latin America               | 63.9<br>(50.4-77.8)            | -16.8<br>(-23.0--10.6)         |
| Bolivia (Plurinational State of)   | 111<br>(82.3-144)              | -4.95<br>(-17.1-8.12)          |
| Ecuador                            | 95.2<br>(75.5-115)             | -10.4<br>(-18.7--1.56)         |
| Peru                               | 20.2<br>(0.891-42.3)           | -31.4<br>(-41.5--19.6)         |
| Caribbean                          | 4.13<br>(-2.09-11.3)           | -33.0<br>(-37.0--28.6)         |
| Antigua and Barbuda                | 136<br>(101-174)               | 31.5<br>(12.6-52.0)            |
| Bahamas                            | 60.4<br>(38.5-84.9)            | -3.38<br>(-15.9-11.1)          |
| Barbados                           | 4.18<br>(-9.43-20.5)           | -12.1<br>(-24.1-1.88)          |
| Belize                             | 182<br>(143-222)               | 0.519<br>(-11.7-13.3)          |
| Bermuda                            | 6.24<br>(-7.22-23.0)           | -1.43<br>(-13.8-14.4)          |
| Cuba                               | -13.4<br>(-22.4--2.85)         | -28.9<br>(-36.0--20.9)         |
| Dominica                           | 3.81<br>(-11.1-20.1)           | -3.09<br>(-16.6-12.0)          |
| Dominican Republic                 | 74.1<br>(51.0-98.7)            | -13.1<br>(-24.3--0.792)        |
| Grenada                            | 74.1<br>(50.2-101)             | 9.20<br>(-6.10-24.8)           |
| Guyana                             | 19.5<br>(5.09-35.1)            | 3.04<br>(-8.07-15.9)           |
| Haiti                              | 21.1<br>(4.68-38.3)            | -47.5<br>(-54.4-40.5)          |
| Jamaica                            | 12.0<br>(0.234-25.0)           | -24.9<br>(-32.4--17.1)         |
| Puerto Rico                        | -12.5<br>(-21.0--3.15)         | -16.8<br>(-25.2--7.63)         |
| Saint Kitts and Nevis              | 97.1<br>(66.9-132)             | 2.58<br>(-12.6-20.6)           |
| Saint Lucia                        | 49.7<br>(31.1-71.0)            | -11.8<br>(-22.2-0.375)         |
| Saint Vincent and the Grenadines   | 21.6<br>(7.16-37.8)            | -2.28<br>(-13.2-9.88)          |
| Suriname                           | 33.7<br>(19.4-48.9)            | -20.6<br>(-28.4--11.9)         |
| Trinidad and Tobago                | 18.9<br>(5.13-33.4)            | -11.2<br>(-21.4--0.848)        |
| United States Virgin Islands       | -16.0<br>(-29.1--1.87)         | -24.1<br>(-36.0--10.9)         |
| Central Latin America              | 7.15<br>(1.85-12.7)            | -40.9<br>(-43.7--38.2)         |
| Colombia                           | -11.1<br>(-22.3-0.794)         | -47.1<br>(-53.4-40.4)          |

|                                     |                           |                               |
|-------------------------------------|---------------------------|-------------------------------|
| Costa Rica                          | -2.53<br>(-14.5–11.4)     | -47.4<br>(-53.6–40.5)         |
| El Salvador                         | 79.6<br>(54.5–107)        | 30.5<br>(13.2–49.1)           |
| Guatemala                           | 142<br>(112–175)          | -15.2<br>(-24.7–4.86)         |
| Honduras                            | 110<br>(86.2–136)         | -20.2<br>(-28.4–11.3)         |
| Mexico                              | 0.600<br>(-6.45–8.37)     | -43.0<br>(-46.4–39.0)         |
| Nicaragua                           | 67.0<br>(45.5–91.6)       | -21.7<br>(-31.2–11.3)         |
| Panama                              | 18.4<br>(2.71–36.1)       | -38.8<br>(-46.2–30.1)         |
| Venezuela (Bolivarian Republic of)  | 18.0<br>(3.07–34.4)       | -34.7<br>(-42.5–26.1)         |
| Tropical Latin America              | -51.9<br>(-55.1–48.5)     | -72.7<br>(-74.5–70.7)         |
| Brazil                              | -53.4<br>(-56.6–49.8)     | -73.4<br>(-75.2–71.4)         |
| Paraguay                            | 28.2<br>(14.1–43.4)       | -40.2<br>(-46.3–33.7)         |
| <b>North Africa and Middle East</b> | <b>104<br/>(98.1–111)</b> | <b>-8.96<br/>(-11.6–6.41)</b> |
| North Africa and Middle East        | 104<br>(98.1–111)         | -8.96<br>(-11.6–6.41)         |
| Afghanistan                         | 1060<br>(900–1240)        | 221<br>(177–268)              |
| Algeria                             | 102<br>(79.8–126)         | -7.80<br>(-16.8–1.31)         |
| Bahrain                             | 257<br>(215–302)          | -3.10<br>(-12.7–7.14)         |
| Egypt                               | 136<br>(117–155)          | 15.6<br>(7.20–24.4)           |
| Iran (Islamic Republic of)          | 127<br>(102–155)          | 2.13<br>(-8.98–13.8)          |
| Iraq                                | 152<br>(130–175)          | -19.0<br>(-25.3–12.4)         |
| Jordan                              | 345<br>(310–385)          | 13.7<br>(5.87–21.9)           |
| Kuwait                              | 125<br>(103–151)          | -21.9<br>(-28.7–14.7)         |
| Lebanon                             | 151<br>(127–177)          | 31.4<br>(19.5–44.4)           |
| Libya                               | 131<br>(109–155)          | -5.94<br>(-14.0–2.82)         |
| Morocco                             | 19.6<br>(7.75–32.7)       | -32.4<br>(-38.6–25.4)         |
| Oman                                | 168<br>(134–206)          | -21.4<br>(-29.6–12.6)         |
| Palestine                           | 187<br>(164–210)          | -4.40<br>(-10.9–2.35)         |
| Qatar                               | 635<br>(535–753)          | 1.12<br>(-10.0–13.9)          |

|                                               |                                   |                                     |
|-----------------------------------------------|-----------------------------------|-------------------------------------|
| Saudi Arabia                                  | 344<br>(301–393)                  | 37.8<br>(25.6–51.4)                 |
| Sudan                                         | 101<br>(76.7–129)                 | -11.9<br>(-21.9–0.964)              |
| Syrian Arab Republic                          | 20.8<br>(9.49–32.2)               | -23.3<br>(-29.9–16.6)               |
| Tunisia                                       | 49.7<br>(39.4–61.0)               | -13.5<br>(-18.9–7.50)               |
| Turkey                                        | 45.8<br>(36.5–54.7)               | -13.5<br>(-19.0–8.36)               |
| United Arab Emirates                          | 405<br>(334–482)                  | -19.6<br>(-29.1–10.1)               |
| Yemen                                         | 183<br>(149–216)                  | -2.90<br>(-13.1–7.98)               |
| <b>South Asia</b>                             | <b>23.7</b><br><b>(17.8–29.7)</b> | <b>-39.1</b><br><b>(-41.9–36.3)</b> |
| South Asia                                    | 23.7<br>(17.8–29.7)               | -39.1<br>(-41.9–36.3)               |
| Bangladesh                                    | 66.0<br>(55.7–76.4)               | -18.0<br>(-22.8–13.3)               |
| Bhutan                                        | 27.7<br>(9.33–49.6)               | -11.7<br>(-22.6–0.661)              |
| India                                         | 17.3<br>(10.3–24.6)               | -41.5<br>(-44.8–38.0)               |
| Nepal                                         | 9.67<br>(0.697–19.7)              | -45.1<br>(-49.4–40.2)               |
| Pakistan                                      | 31.2<br>(19.4–44.0)               | -41.3<br>(-46.1–36.2)               |
| <b>Southeast Asia, East Asia, and Oceania</b> | <b>30.0</b><br><b>(26.5–33.4)</b> | <b>-17.5</b><br><b>(-19.7–15.4)</b> |
| East Asia                                     | 22.3<br>(18.0–26.4)               | -19.3<br>(-22.2–16.5)               |
| China                                         | 22.2<br>(17.8–26.5)               | -19.5<br>(-22.5–16.6)               |
| Democratic People's Republic of Korea         | 50.4<br>(38.6–62.5)               | 0.415<br>(-7.40–8.63)               |
| Taiwan (Province of China)                    | 7.49<br>(-1.00–16.7)              | -21.7<br>(-27.9–15.3)               |
| Oceania                                       | 86.9<br>(73.2–102)                | -16.1<br>(-21.8–9.79)               |
| American Samoa                                | 20.8<br>(7.25–36.1)               | -5.28<br>(-15.3–5.58)               |
| Cook Islands                                  | -5.03<br>(-15.1–6.36)             | -8.58<br>(-18.4–2.20)               |
| Fiji                                          | 13.7<br>(2.83–24.7)               | -15.7<br>(-23.5–7.50)               |
| Guam                                          | 5.79<br>(-4.32–16.4)              | -13.3<br>(-21.1–4.79)               |
| Kiribati                                      | 79.8<br>(64.7–97.1)               | 3.93<br>(-3.85–13.2)                |
| Marshall Islands                              | 71.4<br>(51.9–93.4)               | 7.07<br>(-4.34–19.7)                |
| Micronesia (Federated States of)              | 32.5<br>(21.2–44.2)               | 6.29<br>(-1.91–14.6)                |

|                                  |                                   |                                      |
|----------------------------------|-----------------------------------|--------------------------------------|
| Nauru                            | 8.10<br>(-2.79-19.4)              | -5.92<br>(-14.3-2.67)                |
| Niue                             | -20.0<br>(-29.5--9.28)            | -5.64<br>(-17.2-7.29)                |
| Northern Mariana Islands         | -16.2<br>(-25.4--6.25)            | -17.0<br>(-25.1--7.77)               |
| Palau                            | 25.4<br>(12.3-40.2)               | -1.41<br>(-11.6-9.38)                |
| Papua New Guinea                 | 109<br>(88.6-131)                 | -19.0<br>(-26.2--10.9)               |
| Samoa                            | 28.3<br>(14.6-41.7)               | -11.8<br>(-19.8--3.52)               |
| Solomon Islands                  | 124<br>(103-146)                  | 2.48<br>(-6.37-11.0)                 |
| Tokelau                          | -4.72<br>(-15.6-6.82)             | -1.33<br>(-12.0-10.5)                |
| Tonga                            | -2.61<br>(-10.2-5.00)             | -18.2<br>(-23.4--12.3)               |
| Tuvalu                           | 51.9<br>(36.1-70.2)               | 10.9<br>(-0.348-23.8)                |
| Vanuatu                          | 84.0<br>(65.6-104)                | -14.6<br>(-22.0--6.17)               |
| Southeast Asia                   | 54.7<br>(51.1-58.3)               | -13.3<br>(-15.2--11.4)               |
| Cambodia                         | 91.5<br>(78.2-105)                | -15.7<br>(-21.0--10.3)               |
| Indonesia                        | 84.4<br>(77.0-91.3)               | 8.86<br>(4.65-12.7)                  |
| Lao People's Democratic Republic | 152<br>(129-172)                  | 14.6<br>(4.87-23.1)                  |
| Malaysia                         | 71.4<br>(57.5-85.9)               | -20.0<br>(-26.0--13.5)               |
| Maldives                         | 305<br>(270-341)                  | 4.94<br>(-3.03-13.3)                 |
| Mauritius                        | 16.2<br>(7.99-26.1)               | -12.2<br>(-18.4--5.29)               |
| Myanmar                          | 4.37<br>(-3.07-12.3)              | -37.4<br>(-41.7--32.9)               |
| Philippines                      | 45.7<br>(36.3-56.2)               | -30.0<br>(-34.4--25.4)               |
| Seychelles                       | 52.7<br>(37.1-68.5)               | -5.72<br>(-15.1-3.20)                |
| Sri Lanka                        | -0.651<br>(-8.12-8.10)            | -34.5<br>(-39.2--29.0)               |
| Thailand                         | 10.3<br>(4.28-16.8)               | -27.7<br>(-31.5--23.6)               |
| Timor-Leste                      | 78.1<br>(67.6-88.9)               | -0.858<br>(-5.85-4.42)               |
| Viet Nam                         | 62.0<br>(53.4-70.3)               | -17.3<br>(-21.4--13.1)               |
| <b>Sub-Saharan Africa</b>        | <b>74.6</b><br><b>(69.9-79.1)</b> | <b>-25.9</b><br><b>(-27.7--24.1)</b> |
| Central Sub-Saharan Africa       | 140<br>(119-162)                  | -5.17<br>(-12.7-3.16)                |

|                                  |                     |                       |
|----------------------------------|---------------------|-----------------------|
| Angola                           | 138<br>(110–170)    | -18.1<br>(-26.8–8.44) |
| Central African Republic         | 49.9<br>(28.8–73.0) | -25.7<br>(-35.8–15.2) |
| Congo                            | 233<br>(190–283)    | 31.6<br>(16.3–50.1)   |
| Democratic Republic of the Congo | 140<br>(111–171)    | -2.41<br>(-13.3–9.57) |
| Equatorial Guinea                | 344<br>(279–415)    | 11.8<br>(-1.40–26.8)  |
| Gabon                            | 139<br>(108–175)    | 14.2<br>(0.260–29.8)  |
| Eastern Sub-Saharan Africa       | 82.2<br>(75.1–90.0) | -22.9<br>(-25.6–19.9) |
| Burundi                          | 44.6<br>(26.6–63.5) | -32.0<br>(-39.8–23.8) |
| Comoros                          | 71.7<br>(52.0–93.5) | -13.9<br>(-22.7–3.92) |
| Djibouti                         | 263<br>(224–303)    | 14.5<br>(4.66–25.6)   |
| Eritrea                          | 109<br>(75.8–146)   | -19.3<br>(-31.2–6.30) |
| Ethiopia                         | 98.2<br>(71.3–128)  | -14.0<br>(-24.5–1.64) |
| Kenya                            | 69.1<br>(50.5–87.3) | -36.1<br>(-42.2–29.6) |
| Madagascar                       | 56.7<br>(39.4–73.3) | -38.1<br>(-44.2–31.9) |
| Malawi                           | 98.8<br>(77.5–122)  | -4.48<br>(-14.0–5.88) |
| Mozambique                       | 108<br>(81.4–136)   | -6.04<br>(-17.3–6.14) |
| Rwanda                           | 107<br>(81.6–133)   | -2.34<br>(-13.6–9.44) |
| Somalia                          | 142<br>(109–179)    | -16.3<br>(-26.1–5.13) |
| South Sudan                      | 20.1<br>(4.80–36.9) | -25.0<br>(-33.6–16.0) |
| Uganda                           | 92.8<br>(69.8–120)  | -21.6<br>(-30.0–12.5) |
| United Republic of Tanzania      | 47.8<br>(31.6–65.3) | -37.4<br>(-44.1–30.5) |
| Zambia                           | 179<br>(147–212)    | 2.20<br>(-7.50–12.9)  |
| Southern Sub-Saharan Africa      | 36.1<br>(28.3–44.8) | -25.6<br>(-29.7–21.4) |
| Botswana                         | 122<br>(101–146)    | -7.14<br>(-15.3–1.46) |
| Eswatini                         | 29.9<br>(13.9–48.0) | -28.6<br>(-36.9–19.6) |
| Lesotho                          | 88.4<br>(69.9–107)  | 30.0<br>(17.3–41.9)   |
| Namibia                          | 53.1<br>(36.1–70.8) | -23.5<br>(-31.8–14.7) |

|                            |                      |                        |
|----------------------------|----------------------|------------------------|
| South Africa               | 28.6<br>(19.6–37.9)  | -29.4<br>(-34.1–-24.5) |
| Zimbabwe                   | 72.6<br>(54.9–90.6)  | -3.25<br>(-12.0–5.32)  |
| Western Sub-Saharan Africa | 78.0<br>(69.3–87.1)  | -27.9<br>(-31.2–-24.4) |
| Benin                      | 65.6<br>(44.3–88.7)  | -41.3<br>(-48.1–-34.1) |
| Burkina Faso               | 93.4<br>(68.4–120)   | -26.6<br>(-35.3–-17.2) |
| Cabo Verde                 | 41.6<br>(21.8–65.0)  | -37.8<br>(-46.1–-27.8) |
| Cameroon                   | 113<br>(85.3–142)    | -31.8<br>(-39.8–-22.8) |
| Chad                       | 83.4<br>(60.5–109)   | -28.4<br>(-36.6–-19.5) |
| Côte d'Ivoire              | 163<br>(128–203)     | 8.93<br>(-4.08–23.2)   |
| Gambia                     | 68.7<br>(49.8–88.7)  | -35.3<br>(-41.8–-28.6) |
| Ghana                      | 134<br>(99.9–173)    | -8.79<br>(-20.9–4.42)  |
| Guinea                     | 86.2<br>(65.2–109)   | -9.23<br>(-18.9–1.16)  |
| Guinea-Bissau              | 147<br>(106–193)     | 15.8<br>(-2.12–34.7)   |
| Liberia                    | 153<br>(118–190)     | -9.31<br>(-20.9–3.37)  |
| Mali                       | 225<br>(188–268)     | 31.9<br>(18.2–46.8)    |
| Mauritania                 | 66.6<br>(48.0–87.9)  | -20.2<br>(-28.8–-10.9) |
| Niger                      | 209<br>(162–267)     | 12.0<br>(-3.79–29.9)   |
| Nigeria                    | 26.2<br>(9.52–44.1)  | -46.3<br>(-52.9–-39.2) |
| São Tomé and Príncipe      | 171<br>(134–209)     | 25.8<br>(8.91–43.9)    |
| Senegal                    | 10.0<br>(-2.91–24.8) | -50.9<br>(-56.0–-44.6) |
| Sierra Leone               | 101<br>(77.5–127)    | -15.3<br>(-24.1–-5.37) |
| Togo                       | 54.1<br>(34.1–75.8)  | -42.1<br>(-48.9–-34.9) |

**Supplemental Table S4.** Cigarette-equivalents per person aged 15 years and older in 1990 and 2019, for 204 countries and territories.

| Location                                                | Cigarettes Per Capita, 1990 | Cigarettes Per Capita, 2019 |
|---------------------------------------------------------|-----------------------------|-----------------------------|
| <b>Global</b>                                           | <b>1480</b><br>(1440–1530)  | <b>1110</b><br>(1070–1160)  |
| <b>Central Europe, Eastern Europe, and Central Asia</b> | <b>1950</b><br>(1850–2050)  | <b>1770</b><br>(1630–1920)  |
| Central Asia                                            | 1240<br>(1160–1340)         | 1150<br>(1070–1230)         |
| Armenia                                                 | 2020<br>(1800–2260)         | 1910<br>(1540–2350)         |
| Azerbaijan                                              | 1290<br>(1080–1530)         | 1640<br>(1430–1870)         |
| Georgia                                                 | 1580<br>(1340–1850)         | 1770<br>(1460–2100)         |
| Kazakhstan                                              | 1540<br>(1280–1860)         | 1420<br>(1130–1750)         |
| Kyrgyzstan                                              | 1880<br>(1670–2120)         | 1920<br>(1570–2300)         |
| Mongolia                                                | 912<br>(816–1020)           | 1140<br>(950–1350)          |
| Tajikistan                                              | 1570<br>(1340–1860)         | 1150<br>(903–1450)          |
| Turkmenistan                                            | 2090<br>(1870–2320)         | 1530<br>(1270–1790)         |
| Uzbekistan                                              | 438<br>(364–530)            | 518<br>(440–599)            |
| Central Europe                                          | 2530<br>(2380–2720)         | 1850<br>(1710–2000)         |
| Albania                                                 | 1890<br>(1620–2220)         | 1940<br>(1620–2310)         |
| Bosnia and Herzegovina                                  | 1880<br>(1640–2120)         | 2330<br>(2010–2710)         |
| Bulgaria                                                | 3800<br>(3330–4280)         | 2500<br>(2140–2920)         |
| Croatia                                                 | 2720<br>(2430–3050)         | 2020<br>(1690–2420)         |
| Czechia                                                 | 2250<br>(1970–2570)         | 1920<br>(1580–2340)         |
| Hungary                                                 | 2900<br>(2560–3280)         | 1920<br>(1590–2280)         |
| Montenegro                                              | 2840<br>(2370–3340)         | 2910<br>(2370–3480)         |
| North Macedonia                                         | 2770<br>(2310–3330)         | 2540<br>(2200–2910)         |
| Poland                                                  | 2910<br>(2470–3470)         | 1730<br>(1400–2110)         |
| Romania                                                 | 1890<br>(1630–2200)         | 1490<br>(1210–1780)         |
| Serbia                                                  | 2070<br>(1820–2360)         | 2130<br>(1750–2560)         |



|                           |                                   |                                   |
|---------------------------|-----------------------------------|-----------------------------------|
| Slovakia                  | 1770<br>(1550–2030)               | 1400<br>(1190–1640)               |
| Slovenia                  | 2800<br>(2570–3040)               | 2450<br>(2100–2810)               |
| Eastern Europe            | 1840<br>(1690–2000)               | 2000<br>(1740–2280)               |
| Belarus                   | 2150<br>(1780–2560)               | 2080<br>(1730–2540)               |
| Estonia                   | 1830<br>(1640–2040)               | 1830<br>(1550–2140)               |
| Latvia                    | 2130<br>(1810–2510)               | 1570<br>(1260–1960)               |
| Lithuania                 | 1640<br>(1410–1900)               | 1370<br>(1140–1620)               |
| Republic of Moldova       | 2090<br>(1670–2590)               | 2220<br>(1760–2780)               |
| Russian Federation        | 1790<br>(1600–2010)               | 2120<br>(1770–2500)               |
| Ukraine                   | 1890<br>(1630–2210)               | 1640<br>(1320–2030)               |
| <b>High-income</b>        | <b>2350</b><br><b>(2250–2450)</b> | <b>1470</b><br><b>(1390–1550)</b> |
| Australasia               | 1650<br>(1560–1750)               | 1070<br>(940–1210)                |
| Australia                 | 1670<br>(1570–1790)               | 1100<br>(947–1270)                |
| New Zealand               | 1570<br>(1460–1690)               | 930<br>(769–1110)                 |
| High-income Asia Pacific  | 2150<br>(1930–2390)               | 1500<br>(1310–1720)               |
| Brunei Darussalam         | 2150<br>(1780–2590)               | 1520<br>(1190–1930)               |
| Japan                     | 2150<br>(1860–2440)               | 1520<br>(1260–1800)               |
| Republic of Korea         | 2220<br>(1910–2600)               | 1570<br>(1280–1890)               |
| Singapore                 | 921<br>(769–1100)                 | 548<br>(471–636)                  |
| High-income North America | 2800<br>(2560–3050)               | 1440<br>(1260–1620)               |
| Canada                    | 2510<br>(2230–2800)               | 1450<br>(1230–1700)               |
| Greenland                 | 2400<br>(1810–3120)               | 1840<br>(1410–2360)               |
| United States of America  | 2840<br>(2570–3110)               | 1440<br>(1240–1630)               |
| Southern Latin America    | 1440<br>(1340–1550)               | 1180<br>(1050–1340)               |
| Argentina                 | 1590<br>(1460–1750)               | 1320<br>(1140–1540)               |
| Chile                     | 1040<br>(907–1200)                | 794<br>(666–944)                  |
| Uruguay                   | 1510<br>(1330–1700)               | 1510<br>(1270–1790)               |

|                                    |                                   |                                |
|------------------------------------|-----------------------------------|--------------------------------|
| Western Europe                     | 2260<br>(2140–2400)               | 1540<br>(1430–1660)            |
| Andorra                            | 2150<br>(1640–2760)               | 1800<br>(1380–2290)            |
| Austria                            | 1720<br>(1630–1820)               | 2270<br>(1970–2580)            |
| Belgium                            | 2630<br>(2390–2850)               | 1960<br>(1710–2210)            |
| Cyprus                             | 2420<br>(2200–2670)               | 2230<br>(1840–2730)            |
| Denmark                            | 2590<br>(2260–2950)               | 1970<br>(1640–2360)            |
| Finland                            | 1380<br>(1280–1510)               | 1230<br>(1040–1450)            |
| France                             | 1870<br>(1580–2170)               | 1320<br>(1070–1610)            |
| Germany                            | 2360<br>(2000–2740)               | 1650<br>(1340–2010)            |
| Greece                             | 3470<br>(2970–4030)               | 2370<br>(1880–2960)            |
| Iceland                            | 2690<br>(2370–3070)               | 1820<br>(1500–2200)            |
| Ireland                            | 2160<br>(1910–2420)               | 1350<br>(1110–1620)            |
| Israel                             | 1820<br>(1570–2090)               | 1250<br>(1030–1520)            |
| Italy                              | 2040<br>(1730–2390)               | 1520<br>(1220–1830)            |
| Luxembourg                         | 2140<br>(1650–2780)               | 1790<br>(1370–2280)            |
| Malta                              | 2780<br>(2470–3100)               | 2050<br>(1700–2480)            |
| Monaco                             | 2140<br>(1650–2720)               | 1770<br>(1340–2300)            |
| Netherlands                        | 2440<br>(2040–2920)               | 1450<br>(1150–1760)            |
| Norway                             | 1490<br>(1380–1610)               | 1030<br>(911–1170)             |
| Portugal                           | 1750<br>(1460–2070)               | 1250<br>(993–1530)             |
| San Marino                         | 2160<br>(1690–2750)               | 1790<br>(1380–2320)            |
| Spain                              | 3040<br>(2570–3590)               | 1910<br>(1550–2320)            |
| Sweden                             | 1600<br>(1420–1790)               | 1410<br>(1150–1710)            |
| Switzerland                        | 2770<br>(2320–3270)               | 2020<br>(1620–2490)            |
| United Kingdom                     | 2230<br>(2000–2510)               | 1190<br>(990–1420)             |
| <b>Latin America and Caribbean</b> | <b>1080</b><br><b>(1010–1150)</b> | <b>696</b><br><b>(626–783)</b> |
| Andean Latin America               | 337<br>(309–369)                  | 257<br>(228–290)               |

|                                  |                     |                     |
|----------------------------------|---------------------|---------------------|
| Bolivia (Plurinational State of) | 392<br>(352–438)    | 268<br>(231–309)    |
| Ecuador                          | 510<br>(433–594)    | 321<br>(256–400)    |
| Peru                             | 241<br>(211–279)    | 221<br>(180–267)    |
| Caribbean                        | 1220<br>(1150–1290) | 884<br>(793–985)    |
| Antigua and Barbuda              | 438<br>(366–516)    | 508<br>(407–619)    |
| Bahamas                          | 535<br>(438–651)    | 521<br>(410–670)    |
| Barbados                         | 681<br>(619–748)    | 592<br>(484–717)    |
| Belize                           | 575<br>(502–650)    | 563<br>(448–700)    |
| Bermuda                          | 754<br>(609–914)    | 761<br>(607–916)    |
| Cuba                             | 2420<br>(2220–2630) | 1860<br>(1540–2230) |
| Dominica                         | 493<br>(437–555)    | 457<br>(370–554)    |
| Dominican Republic               | 766<br>(648–897)    | 773<br>(619–967)    |
| Grenada                          | 443<br>(378–522)    | 427<br>(337–536)    |
| Guyana                           | 599<br>(550–657)    | 564<br>(445–708)    |
| Haiti                            | 281<br>(253–311)    | 200<br>(164–240)    |
| Jamaica                          | 1040<br>(957–1130)  | 943<br>(797–1110)   |
| Puerto Rico                      | 683<br>(519–869)    | 648<br>(496–826)    |
| Saint Kitts and Nevis            | 383<br>(338–435)    | 390<br>(313–472)    |
| Saint Lucia                      | 770<br>(681–865)    | 654<br>(543–778)    |
| Saint Vincent and the Grenadines | 468<br>(403–545)    | 522<br>(406–670)    |
| Suriname                         | 1540<br>(1410–1670) | 1220<br>(979–1490)  |
| Trinidad and Tobago              | 1050<br>(969–1150)  | 808<br>(655–980)    |
| United States Virgin Islands     | 682<br>(520–868)    | 648<br>(498–822)    |
| Central Latin America            | 803<br>(737–870)    | 506<br>(458–554)    |
| Colombia                         | 870<br>(764–990)    | 543<br>(462–636)    |
| Costa Rica                       | 798<br>(722–886)    | 536<br>(463–615)    |
| El Salvador                      | 464<br>(411–521)    | 528<br>(427–639)    |

|                                     |                                   |                                   |
|-------------------------------------|-----------------------------------|-----------------------------------|
| Guatemala                           | 501<br>(413–606)                  | 452<br>(360–561)                  |
| Honduras                            | 919<br>(835–1010)                 | 784<br>(636–961)                  |
| Mexico                              | 775<br>(663–887)                  | 426<br>(349–508)                  |
| Nicaragua                           | 772<br>(686–868)                  | 616<br>(501–750)                  |
| Panama                              | 607<br>(551–667)                  | 547<br>(428–677)                  |
| Venezuela (Bolivarian Republic of)  | 1040<br>(919–1180)                | 695<br>(566–843)                  |
| Tropical Latin America              | 1520<br>(1360–1690)               | 994<br>(823–1210)                 |
| Brazil                              | 1530<br>(1370–1700)               | 993<br>(819–1210)                 |
| Paraguay                            | 1200<br>(987–1450)                | 1050<br>(820–1330)                |
| <b>North Africa and Middle East</b> | <b>1400</b><br><b>(1320–1470)</b> | <b>1130</b><br><b>(1060–1210)</b> |
| North Africa and Middle East        | 1400<br>(1320–1470)               | 1130<br>(1060–1210)               |
| Afghanistan                         | 274<br>(233–321)                  | 444<br>(355–546)                  |
| Algeria                             | 1260<br>(1150–1380)               | 1130<br>(988–1300)                |
| Bahrain                             | 1240<br>(981–1600)                | 1180<br>(909–1490)                |
| Egypt                               | 1260<br>(1090–1440)               | 1290<br>(1080–1550)               |
| Iran (Islamic Republic of)          | 816<br>(720–930)                  | 792<br>(642–974)                  |
| Iraq                                | 1890<br>(1640–2170)               | 1450<br>(1170–1770)               |
| Jordan                              | 1970<br>(1770–2190)               | 1450<br>(1190–1730)               |
| Kuwait                              | 2230<br>(1910–2580)               | 1920<br>(1560–2350)               |
| Lebanon                             | 2040<br>(1720–2440)               | 2210<br>(1730–2740)               |
| Libya                               | 1240<br>(1140–1350)               | 1020<br>(828–1270)                |
| Morocco                             | 944<br>(839–1060)                 | 631<br>(536–739)                  |
| Oman                                | 1160<br>(1050–1270)               | 1140<br>(899–1430)                |
| Palestine                           | 1230<br>(957–1560)                | 1170<br>(912–1520)                |
| Qatar                               | 1240<br>(954–1580)                | 1170<br>(906–1470)                |
| Saudi Arabia                        | 1230<br>(956–1560)                | 1170<br>(903–1490)                |
| Sudan                               | 171<br>(142–200)                  | 227<br>(181–280)                  |

|                                               |                                   |                                   |
|-----------------------------------------------|-----------------------------------|-----------------------------------|
| Syrian Arab Republic                          | 1550<br>(1400–1730)               | 1230<br>(992–1530)                |
| Tunisia                                       | 1820<br>(1560–2140)               | 1510<br>(1240–1820)               |
| Turkey                                        | 2670<br>(2360–3040)               | 1770<br>(1440–2150)               |
| United Arab Emirates                          | 1400<br>(1250–1540)               | 1290<br>(1020–1620)               |
| Yemen                                         | 1540<br>(1310–1790)               | 1390<br>(1130–1710)               |
| <b>South Asia</b>                             | <b>713</b><br><b>(663–767)</b>    | <b>558</b><br><b>(490–634)</b>    |
| South Asia                                    | 713<br>(663–767)                  | 558<br>(490–634)                  |
| Bangladesh                                    | 559<br>(517–601)                  | 446<br>(374–523)                  |
| Bhutan                                        | 721<br>(555–916)                  | 630<br>(482–801)                  |
| India                                         | 699<br>(638–768)                  | 559<br>(473–656)                  |
| Nepal                                         | 621<br>(562–690)                  | 478<br>(396–570)                  |
| Pakistan                                      | 977<br>(928–1030)                 | 642<br>(558–734)                  |
| <b>Southeast Asia, East Asia, and Oceania</b> | <b>1830</b><br><b>(1690–1960)</b> | <b>1780</b><br><b>(1640–1930)</b> |
| East Asia                                     | 2090<br>(1910–2270)               | 2130<br>(1930–2350)               |
| China                                         | 2100<br>(1920–2280)               | 2150<br>(1950–2370)               |
| Democratic People's Republic of Korea         | 1430<br>(1240–1630)               | 1350<br>(1060–1680)               |
| Taiwan (Province of China)                    | 2230<br>(1890–2610)               | 1630<br>(1320–2020)               |
| Oceania                                       | 982<br>(828–1170)                 | 950<br>(784–1140)                 |
| American Samoa                                | 984<br>(751–1260)                 | 963<br>(734–1230)                 |
| Cook Islands                                  | 990<br>(773–1260)                 | 958<br>(731–1220)                 |
| Fiji                                          | 790<br>(718–871)                  | 712<br>(600–844)                  |
| Guam                                          | 990<br>(763–1240)                 | 960<br>(726–1230)                 |
| Kiribati                                      | 1070<br>(968–1200)                | 1380<br>(1110–1670)               |
| Marshall Islands                              | 989<br>(758–1270)                 | 966<br>(753–1240)                 |
| Micronesia (Federated States of)              | 990<br>(763–1280)                 | 959<br>(732–1230)                 |
| Nauru                                         | 986<br>(754–1260)                 | 963<br>(732–1220)                 |
| Niue                                          | 994<br>(763–1270)                 | 962<br>(749–1210)                 |

|                                  |                                |                                |
|----------------------------------|--------------------------------|--------------------------------|
| Northern Mariana Islands         | 987<br>(761–1260)              | 960<br>(736–1240)              |
| Palau                            | 1000<br>(770–1280)             | 965<br>(745–1230)              |
| Papua New Guinea                 | 990<br>(759–1270)              | 954<br>(746–1210)              |
| Samoa                            | 1880<br>(1640–2130)            | 1810<br>(1430–2210)            |
| Solomon Islands                  | 1100<br>(1000–1200)            | 1070<br>(904–1250)             |
| Tokelau                          | 990<br>(766–1270)              | 963<br>(739–1220)              |
| Tonga                            | 989<br>(757–1260)              | 959<br>(733–1220)              |
| Tuvalu                           | 989<br>(775–1270)              | 960<br>(735–1220)              |
| Vanuatu                          | 467<br>(415–525)               | 442<br>(355–544)               |
| Southeast Asia                   | 1150<br>(1080–1220)            | 1040<br>(952–1130)             |
| Cambodia                         | 997<br>(888–1120)              | 1160<br>(925–1460)             |
| Indonesia                        | 1030<br>(889–1170)             | 1140<br>(955–1340)             |
| Lao People's Democratic Republic | 1130<br>(1030–1220)            | 1170<br>(901–1480)             |
| Malaysia                         | 1290<br>(1150–1430)            | 932<br>(823–1060)              |
| Maldives                         | 1520<br>(1320–1730)            | 1200<br>(1000–1420)            |
| Mauritius                        | 1140<br>(1050–1230)            | 916<br>(768–1080)              |
| Myanmar                          | 1720<br>(1490–1950)            | 1010<br>(820–1250)             |
| Philippines                      | 1620<br>(1470–1770)            | 1170<br>(980–1390)             |
| Seychelles                       | 1440<br>(1330–1550)            | 1340<br>(1080–1650)            |
| Sri Lanka                        | 733<br>(660–812)               | 403<br>(340–469)               |
| Thailand                         | 1080<br>(990–1200)             | 782<br>(652–936)               |
| Timor-Leste                      | 1160<br>(890–1500)             | 1060<br>(810–1350)             |
| Viet Nam                         | 850<br>(704–1010)              | 942<br>(765–1150)              |
| <b>Sub-Saharan Africa</b>        | <b>414</b><br><b>(399–429)</b> | <b>321</b><br><b>(307–336)</b> |
| Central Sub-Saharan Africa       | 314<br>(295–335)               | 298<br>(264–335)               |
| Angola                           | 665<br>(613–722)               | 586<br>(507–676)               |
| Central African Republic         | 352<br>(300–410)               | 287<br>(230–347)               |

|                                  |                     |                     |
|----------------------------------|---------------------|---------------------|
| Congo                            | 311<br>(276–351)    | 328<br>(273–395)    |
| Democratic Republic of the Congo | 217<br>(194–241)    | 196<br>(156–243)    |
| Equatorial Guinea                | 361<br>(277–468)    | 355<br>(271–455)    |
| Gabon                            | 325<br>(287–366)    | 351<br>(277–441)    |
| Eastern Sub-Saharan Africa       | 300<br>(288–313)    | 260<br>(244–277)    |
| Burundi                          | 428<br>(373–491)    | 292<br>(230–365)    |
| Comoros                          | 337<br>(256–429)    | 316<br>(246–398)    |
| Djibouti                         | 697<br>(537–883)    | 655<br>(502–835)    |
| Eritrea                          | 337<br>(258–434)    | 313<br>(240–402)    |
| Ethiopia                         | 115<br>(106–124)    | 95-1<br>(81-0–110)  |
| Kenya                            | 365<br>(316–419)    | 334<br>(280–392)    |
| Madagascar                       | 498<br>(458–543)    | 280<br>(230–335)    |
| Malawi                           | 335<br>(272–409)    | 326<br>(254–414)    |
| Mozambique                       | 334<br>(307–357)    | 308<br>(242–389)    |
| Rwanda                           | 460<br>(372–556)    | 488<br>(386–604)    |
| Somalia                          | 335<br>(260–423)    | 316<br>(241–402)    |
| South Sudan                      | 337<br>(256–431)    | 317<br>(242–411)    |
| Uganda                           | 251<br>(220–289)    | 249<br>(196–313)    |
| United Republic of Tanzania      | 416<br>(375–457)    | 346<br>(291–410)    |
| Zambia                           | 308<br>(274–344)    | 296<br>(233–367)    |
| Southern Sub-Saharan Africa      | 1260<br>(1140–1390) | 811<br>(703–930)    |
| Botswana                         | 963<br>(862–1080)   | 798<br>(665–958)    |
| Eswatini                         | 269<br>(241–301)    | 230<br>(183–291)    |
| Lesotho                          | 1120<br>(1000–1260) | 1230<br>(1000–1470) |
| Namibia                          | 358<br>(296–429)    | 294<br>(238–358)    |
| South Africa                     | 1430<br>(1270–1600) | 807<br>(667–954)    |
| Zimbabwe                         | 932<br>(766–1130)   | 898<br>(694–1130)   |

|                            |                  |                  |
|----------------------------|------------------|------------------|
| Western Sub-Saharan Africa | 324<br>(310–341) | 298<br>(279–320) |
| Benin                      | 351<br>(301–404) | 285<br>(229–349) |
| Burkina Faso               | 274<br>(230–324) | 241<br>(193–298) |
| Cabo Verde                 | 339<br>(314–368) | 212<br>(181–249) |
| Cameroon                   | 432<br>(365–506) | 358<br>(295–435) |
| Chad                       | 342<br>(263–440) | 318<br>(247–413) |
| Côte d'Ivoire              | 750<br>(669–834) | 734<br>(603–881) |
| Gambia                     | 627<br>(557–706) | 449<br>(368–550) |
| Ghana                      | 209<br>(192–226) | 209<br>(174–250) |
| Guinea                     | 595<br>(528–665) | 568<br>(473–689) |
| Guinea-Bissau              | 166<br>(155–178) | 179<br>(150–213) |
| Liberia                    | 242<br>(214–271) | 223<br>(183–270) |
| Mali                       | 186<br>(163–212) | 252<br>(209–299) |
| Mauritania                 | 545<br>(511–579) | 412<br>(330–507) |
| Niger                      | 180<br>(158–205) | 229<br>(184–279) |
| Nigeria                    | 225<br>(200–253) | 224<br>(191–261) |
| São Tomé and Príncipe      | 143<br>(122–166) | 161<br>(131–197) |
| Senegal                    | 685<br>(636–737) | 505<br>(405–625) |
| Sierra Leone               | 406<br>(380–433) | 335<br>(274–407) |
| Togo                       | 810<br>(696–938) | 626<br>(493–782) |



**Supplemental Table S5.** All-cause and all-age smoking attributable deaths by location and sex, 2019. Estimates are reported as total number of attributable deaths, percent of deaths attributable to smoking, and smoking attributable death rate (per 100,000).

| Location                                                | Sex           | Number                              | Percent                    | Rate                       |
|---------------------------------------------------------|---------------|-------------------------------------|----------------------------|----------------------------|
| <b>Global</b>                                           | <b>Both</b>   | <b>7690000</b><br>(7160000–8200000) | <b>13·6</b><br>(13·0–14·3) | <b>99·4</b><br>(92·5–106)  |
| <b>Global</b>                                           | <b>Female</b> | <b>1510000</b><br>(1400000–1630000) | <b>5·84</b><br>(5·47–6·22) | <b>39·2</b><br>(36·3–42·2) |
| <b>Global</b>                                           | <b>Male</b>   | <b>6180000</b><br>(5680000–6680000) | <b>20·2</b><br>(19·3–21·1) | <b>159</b><br>(146–172)    |
| <b>Central Europe, Eastern Europe, and Central Asia</b> | <b>Both</b>   | <b>775000</b><br>(712000–841000)    | <b>16·3</b><br>(15·6–17·1) | <b>185</b><br>(170–201)    |
| <b>Central Europe, Eastern Europe, and Central Asia</b> | <b>Female</b> | <b>149000</b><br>(135000–167000)    | <b>6·40</b><br>(5·99–6·82) | <b>68·5</b><br>(61·8–76·7) |
| <b>Central Europe, Eastern Europe, and Central Asia</b> | <b>Male</b>   | <b>625000</b><br>(569000–683000)    | <b>26·0</b><br>(25·2–26·7) | <b>313</b><br>(285–342)    |
| Central Asia                                            | Both          | 84400<br>(77000–92500)              | 13·2<br>(12·8–13·7)        | 90·2<br>(82·3–98·9)        |
| Central Asia                                            | Female        | 7540<br>(6590–8580)                 | 2·61<br>(2·36–2·89)        | 16·0<br>(14·0–18·2)        |
| Central Asia                                            | Male          | 76800<br>(69800–84500)              | 22·0<br>(21·3–22·8)        | 166<br>(151–182)           |
| Armenia                                                 | Both          | 4860<br>(4090–5690)                 | 17·4<br>(16·6–18·1)        | 161<br>(136–189)           |
| Armenia                                                 | Female        | 251<br>(197–323)                    | 1·85<br>(1·51–2·26)        | 16·1<br>(12·6–20·7)        |
| Armenia                                                 | Male          | 4610<br>(3880–5390)                 | 32·0<br>(30·8–33·4)        | 317<br>(266–370)           |
| Azerbaijan                                              | Both          | 12500<br>(10400–15300)              | 16·6<br>(14·8–18·5)        | 122<br>(101–149)           |
| Azerbaijan                                              | Female        | 443<br>(316–601)                    | 1·29<br>(0·970–1·67)       | 8·62<br>(6·16–11·7)        |
| Azerbaijan                                              | Male          | 12100<br>(9960–14800)               | 29·5<br>(28·0–31·0)        | 234<br>(194–288)           |
| Georgia                                                 | Both          | 7170<br>(6120–8360)                 | 14·5<br>(13·8–15·3)        | 196<br>(167–228)           |
| Georgia                                                 | Female        | 744<br>(592–926)                    | 3·08<br>(2·58–3·73)        | 39·0<br>(31·0–48·5)        |
| Georgia                                                 | Male          | 6430<br>(5490–7470)                 | 25·4<br>(24·3–26·7)        | 366<br>(313–426)           |
| Kazakhstan                                              | Both          | 20200<br>(17600–23000)              | 14·5<br>(13·7–15·4)        | 110<br>(95·6–125)          |
| Kazakhstan                                              | Female        | 2200<br>(1790–2660)                 | 3·43<br>(2·88–4·04)        | 23·2<br>(18·9–28·1)        |
| Kazakhstan                                              | Male          | 18000<br>(15700–20600)              | 23·8<br>(22·6–25·3)        | 202<br>(176–231)           |
| Kyrgyzstan                                              | Both          | 5030<br>(4380–5690)                 | 14·5<br>(13·7–15·4)        | 76·9<br>(67·0–87·1)        |
| Kyrgyzstan                                              | Female        | 569<br>(456–694)                    | 3·69<br>(3·06–4·39)        | 17·2<br>(13·8–21·0)        |

|                        |        |                           |                     |                     |
|------------------------|--------|---------------------------|---------------------|---------------------|
| Kyrgyzstan             | Male   | 4460<br>(3900–5060)       | 23·1<br>(22·0–24·3) | 138<br>(121–157)    |
| Mongolia               | Both   | 3770<br>(2960–4840)       | 15·1<br>(14·1–16·2) | 111<br>(87·4–143)   |
| Mongolia               | Female | 486<br>(368–629)          | 4·95<br>(4·17–5·77) | 28·3<br>(21·5–36·7) |
| Mongolia               | Male   | 3280<br>(2590–4170)       | 21·8<br>(20·3–23·3) | 196<br>(155–250)    |
| Tajikistan             | Both   | 4630<br>(3740–5770)       | 9·51<br>(8·62–10·6) | 48·8<br>(39·4–60·8) |
| Tajikistan             | Female | 470<br>(346–637)          | 2·19<br>(1·68–2·87) | 10·0<br>(7·38–13·6) |
| Tajikistan             | Male   | 4160<br>(3370–5190)       | 15·3<br>(13·9–16·7) | 86·8<br>(70·2–108)  |
| Turkmenistan           | Both   | 4040<br>(3210–5050)       | 12·0<br>(11·2–12·8) | 79·6<br>(63·1–99·4) |
| Turkmenistan           | Female | 529<br>(382–697)          | 3·59<br>(2·85–4·40) | 21·3<br>(15·3–28·0) |
| Turkmenistan           | Male   | 3510<br>(2780–4380)       | 18·6<br>(17·4–19·8) | 135<br>(107–169)    |
| Uzbekistan             | Both   | 22200<br>(18500–26200)    | 10·9<br>(10·3–11·5) | 65·9<br>(55·1–77·8) |
| Uzbekistan             | Female | 1850<br>(1380–2440)       | 2·03<br>(1·61–2·57) | 11·0<br>(8·16–14·5) |
| Uzbekistan             | Male   | 20300<br>(17000–23900)    | 18·1<br>(17·0–19·1) | 121<br>(101–142)    |
| Central Europe         | Both   | 248000<br>(218000–282000) | 18·1<br>(17·4–18·8) | 217<br>(190–247)    |
| Central Europe         | Female | 74600<br>(65100–86100)    | 11·1<br>(10·5–11·7) | 127<br>(111–147)    |
| Central Europe         | Male   | 174000<br>(151000–198000) | 24·8<br>(24·0–25·7) | 312<br>(271–356)    |
| Albania                | Both   | 4420<br>(3410–5690)       | 19·5<br>(18·2–21·0) | 163<br>(125–209)    |
| Albania                | Female | 801<br>(594–1060)         | 8·10<br>(6·70–9·86) | 59·0<br>(43·8–78·2) |
| Albania                | Male   | 3620<br>(2750–4690)       | 28·3<br>(26·7–30·2) | 266<br>(202–344)    |
| Bosnia and Herzegovina | Both   | 8700<br>(6950–10900)      | 23·2<br>(22·2–24·4) | 264<br>(211–329)    |
| Bosnia and Herzegovina | Female | 2850<br>(2250–3540)       | 15·4<br>(14·0–16·9) | 168<br>(133–209)    |
| Bosnia and Herzegovina | Male   | 5850<br>(4660–7280)       | 30·8<br>(29·6–32·2) | 364<br>(289–452)    |
| Bulgaria               | Both   | 20600<br>(16500–25600)    | 16·6<br>(15·7–17·6) | 298<br>(238–369)    |
| Bulgaria               | Female | 5350<br>(4190–6770)       | 8·76<br>(7·86–9·85) | 150<br>(117–190)    |
| Bulgaria               | Male   | 15300<br>(12200–18700)    | 24·1<br>(23·0–25·4) | 454<br>(363–556)    |
| Croatia                | Both   | 9640<br>(7810–12000)      | 18·4<br>(17·5–19·5) | 227<br>(184–282)    |
| Croatia                | Female | 3070<br>(2470–3840)       | 11·6<br>(10·5–12·7) | 140<br>(113–175)    |

|                 |        |                        |                     |                     |
|-----------------|--------|------------------------|---------------------|---------------------|
| Croatia         | Male   | 6570<br>(5260–8110)    | 25·4<br>(24·2–26·7) | 319<br>(255–394)    |
| Czechia         | Both   | 20700<br>(17000–24900) | 18·2<br>(17·3–19·1) | 195<br>(159–234)    |
| Czechia         | Female | 6840<br>(5610–8280)    | 12·2<br>(11·1–13·2) | 127<br>(104–153)    |
| Czechia         | Male   | 13900<br>(11400–16800) | 24·1<br>(23·0–25·2) | 265<br>(217–320)    |
| Hungary         | Both   | 24800<br>(20600–29900) | 19·2<br>(18·4–20·1) | 257<br>(213–309)    |
| Hungary         | Female | 8730<br>(7200–10600)   | 13·1<br>(12·1–14·0) | 172<br>(142–209)    |
| Hungary         | Male   | 16100<br>(13300–19400) | 25·9<br>(24·8–27·1) | 349<br>(289–421)    |
| Montenegro      | Both   | 1760<br>(1490–2070)    | 25·9<br>(24·4–27·5) | 284<br>(241–333)    |
| Montenegro      | Female | 604<br>(511–710)       | 19·3<br>(17·1–21·6) | 193<br>(163–226)    |
| Montenegro      | Male   | 1160<br>(963–1390)     | 31·6<br>(29·9–33·3) | 377<br>(314–452)    |
| North Macedonia | Both   | 5310<br>(4230–6580)    | 22·0<br>(20·8–23·3) | 247<br>(196–305)    |
| North Macedonia | Female | 1650<br>(1290–2070)    | 14·6<br>(13·0–16·4) | 155<br>(122–195)    |
| North Macedonia | Male   | 3660<br>(2910–4540)    | 28·6<br>(27·1–30·2) | 335<br>(266–415)    |
| Poland          | Both   | 77700<br>(65000–92400) | 19·1<br>(17·9–20·4) | 202<br>(169–240)    |
| Poland          | Female | 24200<br>(19200–29900) | 12·2<br>(11·4–13·3) | 122<br>(96·9–151)   |
| Poland          | Male   | 53500<br>(42300–66500) | 25·5<br>(24·5–26·7) | 288<br>(228–358)    |
| Romania         | Both   | 39000<br>(32300–46500) | 14·8<br>(14·1–15·6) | 203<br>(168–242)    |
| Romania         | Female | 9260<br>(7450–11300)   | 7·25<br>(6·46–8·11) | 93·7<br>(75·5–114)  |
| Romania         | Male   | 29700<br>(24600–35800) | 22·0<br>(21·0–23·0) | 318<br>(263–382)    |
| Serbia          | Both   | 24400<br>(19600–29700) | 20·7<br>(19·7–21·8) | 278<br>(224–339)    |
| Serbia          | Female | 8450<br>(6870–10400)   | 14·5<br>(13·3–15·7) | 192<br>(156–235)    |
| Serbia          | Male   | 15900<br>(12800–19500) | 26·7<br>(25·4–28·1) | 367<br>(294–450)    |
| Slovakia        | Both   | 8220<br>(6480–10200)   | 15·1<br>(14·2–16·0) | 151<br>(119–187)    |
| Slovakia        | Female | 1910<br>(1490–2410)    | 7·07<br>(6·32–7·89) | 68·7<br>(53·6–86·5) |
| Slovakia        | Male   | 6310<br>(4980–7790)    | 22·9<br>(21·6–24·3) | 238<br>(188–293)    |
| Slovenia        | Both   | 2980<br>(2330–3800)    | 14·3<br>(13·4–15·4) | 144<br>(112–183)    |
| Slovenia        | Female | 892<br>(680–1150)      | 8·59<br>(7·73–9·67) | 85·3<br>(65·0–110)  |

|                     |               |                                            |                                   |                                 |
|---------------------|---------------|--------------------------------------------|-----------------------------------|---------------------------------|
| Slovenia            | Male          | 2090<br>(1640–2680)                        | 20·0<br>(18·7–21·3)               | 203<br>(160–261)                |
| Eastern Europe      | Both          | 442000<br>(391000–495000)                  | 16·2<br>(15·2–17·3)               | 211<br>(186–236)                |
| Eastern Europe      | Female        | 67200<br>(57400–78500)                     | 4·90<br>(4·49–5·30)               | 59·8<br>(51·0–69·8)             |
| Eastern Europe      | Male          | 375000<br>(325000–427000)                  | 27·6<br>(26·8–28·4)               | 384<br>(333–437)                |
| Belarus             | Both          | 20500<br>(16400–25500)                     | 16·8<br>(16·0–17·7)               | 216<br>(173–268)                |
| Belarus             | Female        | 2790<br>(2100–3650)                        | 4·52<br>(3·84–5·30)               | 55·0<br>(41·5–71·9)             |
| Belarus             | Male          | 17700<br>(14100–22000)                     | 29·5<br>(28·2–30·8)               | 400<br>(319–497)                |
| Estonia             | Both          | 2200<br>(1730–2760)                        | 13·8<br>(12·9–15·5)               | 167<br>(132–211)                |
| Estonia             | Female        | 644<br>(505–817)                           | 7·35<br>(6·61–8·74)               | 92·8<br>(72·7–118)              |
| Estonia             | Male          | 1550<br>(1210–1960)                        | 21·7<br>(20·4–24·0)               | 251<br>(195–318)                |
| Latvia              | Both          | 3690<br>(3070–4420)                        | 13·4<br>(12·0–15·0)               | 193<br>(160–231)                |
| Latvia              | Female        | 835<br>(642–1100)                          | 5·47<br>(4·83–6·26)               | 80·8<br>(62·1–106)              |
| Latvia              | Male          | 2850<br>(2260–3540)                        | 23·4<br>(22·2–24·8)               | 324<br>(257–401)                |
| Lithuania           | Both          | 4930<br>(4080–5950)                        | 12·8<br>(12·1–13·6)               | 177<br>(146–213)                |
| Lithuania           | Female        | 843<br>(675–1050)                          | 4·11<br>(3·60–4·74)               | 56·0<br>(44·8–69·6)             |
| Lithuania           | Male          | 4090<br>(3380–4940)                        | 22·7<br>(21·6–24·0)               | 318<br>(262–383)                |
| Republic of Moldova | Both          | 5920<br>(5170–6730)                        | 14·4<br>(13·5–15·4)               | 161<br>(140–183)                |
| Republic of Moldova | Female        | 685<br>(538–854)                           | 3·45<br>(2·78–4·21)               | 35·5<br>(27·9–44·3)             |
| Republic of Moldova | Male          | 5240<br>(4600–5910)                        | 24·8<br>(23·4–26·3)               | 298<br>(261–336)                |
| Russian Federation  | Both          | 291000<br>(247000–337000)                  | 16·3<br>(14·9–17·8)               | 199<br>(169–230)                |
| Russian Federation  | Female        | 46800<br>(38700–56900)                     | 5·16<br>(4·70–5·62)               | 59·7<br>(49·3–72·6)             |
| Russian Federation  | Male          | 245000<br>(204000–292000)                  | 27·7<br>(26·8–28·8)               | 358<br>(298–427)                |
| Ukraine             | Both          | 113000<br>(94200–134000)                   | 16·2<br>(14·6–17·9)               | 257<br>(214–305)                |
| Ukraine             | Female        | 14600<br>(11300–18600)                     | 4·30<br>(3·74–4·94)               | 61·5<br>(47·6–78·5)             |
| Ukraine             | Male          | 98800<br>(80400–120000)                    | 27·5<br>(26·3–28·6)               | 487<br>(396–590)                |
| <b>High-income</b>  | <b>Both</b>   | <b>1590000</b><br><b>(1530000–1660000)</b> | <b>16·0</b><br><b>(15·3–16·7)</b> | <b>147</b><br><b>(141–153)</b>  |
| <b>High-income</b>  | <b>Female</b> | <b>555000</b><br><b>(525000–586000)</b>    | <b>11·3</b><br><b>(10·7–11·9)</b> | <b>101</b><br><b>(95·4–106)</b> |

| <b>High-income</b>        | <b>Male</b> | <b>1030000<br/>(992000–1080000)</b> | <b>20-5<br/>(19-7–21-4)</b> | <b>194<br/>(186–203)</b> |
|---------------------------|-------------|-------------------------------------|-----------------------------|--------------------------|
| Australasia               | Both        | 23800<br>(22500–25300)              | 11-6<br>(11-0–12-3)         | 81-9<br>(77-4–87-1)      |
| Australasia               | Female      | 10200<br>(9360–11100)               | 10-3<br>(9-50–11-2)         | 69-0<br>(63-4–75-1)      |
| Australasia               | Male        | 13600<br>(12900–14400)              | 12-8<br>(12-1–13-5)         | 95-1<br>(89-8–101)       |
| Australia                 | Both        | 19000<br>(17900–20300)              | 11-1<br>(10-5–11-8)         | 77-3<br>(72-7–82-6)      |
| Australia                 | Female      | 8100<br>(7340–8930)                 | 9-89<br>(9-00–10-9)         | 65-1<br>(59-0–71-8)      |
| Australia                 | Male        | 10900<br>(10200–11600)              | 12-3<br>(11-5–13-0)         | 89-8<br>(84-3–96-0)      |
| New Zealand               | Both        | 4790<br>(4510–5100)                 | 13-9<br>(13-1–14-7)         | 107<br>(100–113)         |
| New Zealand               | Female      | 2080<br>(1910–2250)                 | 12-4<br>(11-4–13-3)         | 89-9<br>(82-6–97-4)      |
| New Zealand               | Male        | 2720<br>(2540–2900)                 | 15-3<br>(14-4–16-3)         | 124<br>(116–133)         |
| High-income Asia Pacific  | Both        | 254000<br>(238000–274000)           | 14-6<br>(13-7–15-7)         | 136<br>(127–146)         |
| High-income Asia Pacific  | Female      | 45600<br>(40400–52100)              | 5-38<br>(4-77–6-12)         | 48-0<br>(42-5–54-9)      |
| High-income Asia Pacific  | Male        | 208000<br>(196000–223000)           | 23-3<br>(21-9–24-9)         | 226<br>(212–241)         |
| Brunei Darussalam         | Both        | 267<br>(231–309)                    | 14-2<br>(13-0–15-6)         | 61-1<br>(52-9–70-6)      |
| Brunei Darussalam         | Female      | 62-2<br>(50-2–77-0)                 | 7-38<br>(6-07–9-01)         | 29-9<br>(24-1–37-0)      |
| Brunei Darussalam         | Male        | 205<br>(175–240)                    | 19-7<br>(18-2–21-3)         | 89-4<br>(76-3–105)       |
| Japan                     | Both        | 199000<br>(185000–216000)           | 14-2<br>(13-2–15-4)         | 156<br>(145–169)         |
| Japan                     | Female      | 37000<br>(32200–42600)              | 5-37<br>(4-68–6-18)         | 56-4<br>(49-2–65-1)      |
| Japan                     | Male        | 162000<br>(151000–176000)           | 22-8<br>(21-3–24-6)         | 261<br>(243–282)         |
| Republic of Korea         | Both        | 51600<br>(47700–55600)              | 16-2<br>(15-1–17-3)         | 96-6<br>(89-3–104)       |
| Republic of Korea         | Female      | 8070<br>(6570–9660)                 | 5-45<br>(4-46–6-52)         | 30-5<br>(24-9–36-6)      |
| Republic of Korea         | Male        | 43500<br>(40500–46900)              | 25-5<br>(23-9–27-1)         | 161<br>(150–174)         |
| Singapore                 | Both        | 2810<br>(2600–3050)                 | 12-1<br>(11-2–13-1)         | 49-6<br>(45-8–53-8)      |
| Singapore                 | Female      | 518<br>(430–629)                    | 4-80<br>(4-01–5-81)         | 18-7<br>(15-5–22-7)      |
| Singapore                 | Male        | 2300<br>(2120–2480)                 | 18-5<br>(17-1–19-8)         | 79-3<br>(73-3–85-7)      |
| High-income North America | Both        | 578000<br>(554000–603000)           | 17-9<br>(17-1–18-7)         | 158<br>(152–165)         |
| High-income North America | Female      | 250000<br>(235000–265000)           | 16-0<br>(15-0–17-0)         | 135<br>(127–143)         |

|                           |        |                           |                     |                     |
|---------------------------|--------|---------------------------|---------------------|---------------------|
| High-income North America | Male   | 328000<br>(315000–343000) | 19·6<br>(18·8–20·4) | 183<br>(175–191)    |
| Canada                    | Both   | 49600<br>(46900–52600)    | 17·2<br>(16·3–18·2) | 136<br>(128–144)    |
| Canada                    | Female | 20900<br>(19200–22700)    | 14·9<br>(13·7–16·2) | 113<br>(104–122)    |
| Canada                    | Male   | 28700<br>(27000–30500)    | 19·4<br>(18·4–20·5) | 160<br>(150–170)    |
| Greenland                 | Both   | 127<br>(105–150)          | 26·5<br>(24·9–28·1) | 226<br>(187–268)    |
| Greenland                 | Female | 50·1<br>(41·3–60·3)       | 26·7<br>(24·3–29·0) | 188<br>(155–227)    |
| Greenland                 | Male   | 77·2<br>(62·7–90·9)       | 26·4<br>(24·7–28·1) | 261<br>(212–307)    |
| United States of America  | Both   | 528000<br>(506000–551000) | 17·9<br>(17·2–18·7) | 161<br>(154–168)    |
| United States of America  | Female | 229000<br>(215000–243000) | 16·1<br>(15·1–17·1) | 137<br>(129–146)    |
| United States of America  | Male   | 299000<br>(287000–313000) | 19·6<br>(18·8–20·4) | 185<br>(178–194)    |
| Southern Latin America    | Both   | 67400<br>(63700–71300)    | 13·6<br>(12·9–14·4) | 101<br>(95·4–107)   |
| Southern Latin America    | Female | 25600<br>(23500–27900)    | 10·8<br>(9·88–11·6) | 75·0<br>(68·8–81·7) |
| Southern Latin America    | Male   | 41700<br>(39600–44000)    | 16·2<br>(15·4–17·0) | 128<br>(122–135)    |
| Argentina                 | Both   | 51300<br>(48200–54600)    | 14·7<br>(13·8–15·6) | 114<br>(107–121)    |
| Argentina                 | Female | 19700<br>(17900–21700)    | 11·8<br>(10·7–12·8) | 85·4<br>(77·6–93·7) |
| Argentina                 | Male   | 31600<br>(29800–33400)    | 17·4<br>(16·5–18·5) | 144<br>(136–152)    |
| Chile                     | Both   | 11200<br>(10400–12100)    | 9·89<br>(9·23–10·6) | 61·4<br>(57·2–66·5) |
| Chile                     | Female | 4450<br>(4000–5020)       | 8·32<br>(7·50–9·27) | 48·1<br>(43·2–54·2) |
| Chile                     | Male   | 6730<br>(6240–7280)       | 11·3<br>(10·5–12·1) | 75·3<br>(69·8–81·5) |
| Uruguay                   | Both   | 4860<br>(4600–5170)       | 14·4<br>(13·6–15·2) | 142<br>(134–151)    |
| Uruguay                   | Female | 1430<br>(1280–1590)       | 8·44<br>(7·61–9·39) | 79·8<br>(71·6–89·0) |
| Uruguay                   | Male   | 3440<br>(3250–3640)       | 20·3<br>(19·3–21·3) | 209<br>(197–221)    |
| Western Europe            | Both   | 667000<br>(640000–698000) | 15·6<br>(15·0–16·3) | 153<br>(147–160)    |
| Western Europe            | Female | 224000<br>(212000–238000) | 10·3<br>(9·79–11·0) | 101<br>(95·6–107)   |
| Western Europe            | Male   | 443000<br>(425000–463000) | 21·0<br>(20·1–21·9) | 207<br>(198–216)    |
| Andorra                   | Both   | 106<br>(82·3–133)         | 17·2<br>(15·6–18·7) | 128<br>(99·1–160)   |
| Andorra                   | Female | 23·9<br>(16·6–32·6)       | 8·84<br>(7·37–10·5) | 59·1<br>(41·0–80·7) |

|         |        |                           |                     |                     |
|---------|--------|---------------------------|---------------------|---------------------|
| Andorra | Male   | 82.6<br>(65.6–101)        | 23.6<br>(21.6–25.5) | 194<br>(154–238)    |
| Austria | Both   | 12300<br>(11700–13200)    | 14.9<br>(14.2–16.0) | 138<br>(131–148)    |
| Austria | Female | 4290<br>(3920–4720)       | 10.1<br>(9.27–11.1) | 94.8<br>(86.7–104)  |
| Austria | Male   | 8030<br>(7570–8570)       | 20.0<br>(19.0–21.3) | 183<br>(172–195)    |
| Belgium | Both   | 19600<br>(18600–20900)    | 17.2<br>(16.3–18.2) | 172<br>(162–183)    |
| Belgium | Female | 6380<br>(5870–7020)       | 11.0<br>(10.2–12.1) | 110<br>(101–121)    |
| Belgium | Male   | 13200<br>(12600–14000)    | 23.5<br>(22.4–24.8) | 236<br>(224–249)    |
| Cyprus  | Both   | 1530<br>(1370–1720)       | 17.6<br>(16.6–18.7) | 117<br>(105–131)    |
| Cyprus  | Female | 341<br>(294–395)          | 8.26<br>(7.26–9.39) | 51.3<br>(44.3–59.4) |
| Cyprus  | Male   | 1190<br>(1070–1340)       | 26.1<br>(24.7–27.6) | 184<br>(165–206)    |
| Denmark | Both   | 12700<br>(12000–13500)    | 23.0<br>(21.9–24.2) | 219<br>(207–233)    |
| Denmark | Female | 5720<br>(5270–6160)       | 21.0<br>(19.5–22.3) | 196<br>(181–211)    |
| Denmark | Male   | 7010<br>(6600–7460)       | 24.9<br>(23.7–26.3) | 243<br>(228–258)    |
| Finland | Both   | 6760<br>(6320–7290)       | 12.1<br>(11.4–12.8) | 122<br>(114–132)    |
| Finland | Female | 2180<br>(1970–2420)       | 7.82<br>(7.12–8.67) | 77.8<br>(70.2–86.4) |
| Finland | Male   | 4580<br>(4290–4910)       | 16.2<br>(15.4–17.2) | 168<br>(157–180)    |
| France  | Both   | 80300<br>(75200–86700)    | 13.3<br>(12.5–14.3) | 121<br>(114–131)    |
| France  | Female | 23700<br>(21100–26800)    | 7.81<br>(6.98–8.80) | 69.4<br>(62.0–78.6) |
| France  | Male   | 56700<br>(53200–60300)    | 18.9<br>(17.8–20.0) | 177<br>(166–188)    |
| Germany | Both   | 144000<br>(136000–153000) | 15.0<br>(14.2–15.9) | 169<br>(160–180)    |
| Germany | Female | 49300<br>(45300–54100)    | 10.1<br>(9.28–11.0) | 115<br>(106–127)    |
| Germany | Male   | 94400<br>(89200–100000)   | 20.0<br>(19.0–21.2) | 224<br>(211–237)    |
| Greece  | Both   | 26300<br>(24900–27900)    | 20.4<br>(19.5–21.5) | 254<br>(241–269)    |
| Greece  | Female | 7310<br>(6670–8010)       | 11.4<br>(10.4–12.5) | 138<br>(126–151)    |
| Greece  | Male   | 18900<br>(18000–20100)    | 29.3<br>(28.0–30.9) | 377<br>(358–399)    |
| Iceland | Both   | 345<br>(310–381)          | 16.3<br>(15.3–17.6) | 99.9<br>(89.8–110)  |
| Iceland | Female | 130<br>(114–148)          | 13.7<br>(12.3–15.3) | 76.0<br>(66.6–86.9) |

|             |        |                        |                     |                     |
|-------------|--------|------------------------|---------------------|---------------------|
| Iceland     | Male   | 215<br>(192–239)       | 18.5<br>(17.2–19.8) | 123<br>(110–137)    |
| Ireland     | Both   | 6180<br>(5810–6610)    | 19.1<br>(18.1–20.2) | 126<br>(118–135)    |
| Ireland     | Female | 2620<br>(2400–2840)    | 16.7<br>(15.4–18.0) | 105<br>(96.8–114)   |
| Ireland     | Male   | 3570<br>(3340–3810)    | 21.3<br>(20.0–22.6) | 147<br>(138–157)    |
| Israel      | Both   | 6140<br>(5730–6640)    | 12.8<br>(12.1–13.8) | 66.0<br>(61.6–71.4) |
| Israel      | Female | 1950<br>(1750–2190)    | 8.12<br>(7.28–9.10) | 41.7<br>(37.3–46.8) |
| Israel      | Male   | 4200<br>(3940–4510)    | 17.5<br>(16.6–18.7) | 90.5<br>(85.1–97.3) |
| Italy       | Both   | 90500<br>(85700–96300) | 14.1<br>(13.4–15.0) | 150<br>(142–160)    |
| Italy       | Female | 27200<br>(25000–30100) | 8.17<br>(7.51–9.02) | 87.9<br>(80.6–97.1) |
| Italy       | Male   | 63300<br>(59900–67200) | 20.5<br>(19.5–21.7) | 216<br>(204–229)    |
| Luxembourg  | Both   | 676<br>(594–774)       | 16.3<br>(14.9–17.7) | 109<br>(96.1–125)   |
| Luxembourg  | Female | 239<br>(200–280)       | 11.4<br>(9.92–12.9) | 77.6<br>(65.1–91.0) |
| Luxembourg  | Male   | 437<br>(385–498)       | 21.3<br>(19.8–23.0) | 141<br>(124–160)    |
| Malta       | Both   | 551<br>(496–616)       | 14.6<br>(13.7–15.6) | 125<br>(113–140)    |
| Malta       | Female | 142<br>(122–170)       | 7.79<br>(6.87–8.94) | 64.8<br>(55.6–77.3) |
| Malta       | Male   | 408<br>(369–453)       | 20.9<br>(19.7–22.1) | 186<br>(168–206)    |
| Monaco      | Both   | 97.3<br>(80.4–115)     | 18.6<br>(16.9–20.3) | 259<br>(214–305)    |
| Monaco      | Female | 32.1<br>(24.2–40.6)    | 12.4<br>(10.5–14.6) | 166<br>(126–211)    |
| Monaco      | Male   | 65.2<br>(54.9–74.8)    | 24.5<br>(22.3–26.6) | 356<br>(300–409)    |
| Netherlands | Both   | 31500<br>(29900–33300) | 20.1<br>(19.1–21.1) | 184<br>(174–194)    |
| Netherlands | Female | 12800<br>(11700–13800) | 16.1<br>(14.8–17.4) | 148<br>(136–160)    |
| Netherlands | Male   | 18700<br>(17800–19800) | 24.1<br>(22.9–25.5) | 220<br>(209–233)    |
| Norway      | Both   | 4820<br>(4500–5150)    | 11.6<br>(10.9–12.4) | 90.1<br>(84.1–96.2) |
| Norway      | Female | 1880<br>(1650–2130)    | 8.92<br>(7.84–10.1) | 70.8<br>(62.2–80.2) |
| Norway      | Male   | 2940<br>(2740–3150)    | 14.5<br>(13.6–15.4) | 109<br>(102–117)    |
| Portugal    | Both   | 12100<br>(11400–12900) | 10.4<br>(9.80–11.1) | 114<br>(107–121)    |
| Portugal    | Female | 1860<br>(1620–2140)    | 3.20<br>(2.79–3.67) | 33.3<br>(29.0–38.3) |



|                                    |               |                                         |                                   |                                   |
|------------------------------------|---------------|-----------------------------------------|-----------------------------------|-----------------------------------|
| Portugal                           | Male          | 10300<br>(9620–11000)                   | 17.7<br>(16.6–18.8)               | 203<br>(190–216)                  |
| San Marino                         | Both          | 41.5<br>(27.4–58.1)                     | 13.7<br>(12.2–15.2)               | 125<br>(82.8–175)                 |
| San Marino                         | Female        | 11.8<br>(7.58–17.8)                     | 7.99<br>(6.51–9.56)               | 68.6<br>(44.2–104)                |
| San Marino                         | Male          | 29.7<br>(19.7–40.6)                     | 19.1<br>(17.2–20.9)               | 187<br>(124–255)                  |
| Spain                              | Both          | 66300<br>(62500–70300)                  | 15.5<br>(14.7–16.4)               | 144<br>(136–153)                  |
| Spain                              | Female        | 11900<br>(10600–13400)                  | 5.56<br>(4.95–6.25)               | 50.9<br>(45.2–57.2)               |
| Spain                              | Male          | 54400<br>(51200–57800)                  | 25.4<br>(24.1–27.0)               | 241<br>(227–256)                  |
| Sweden                             | Both          | 13700<br>(12800–14800)                  | 14.6<br>(13.6–15.8)               | 134<br>(125–145)                  |
| Sweden                             | Female        | 6610<br>(6050–7220)                     | 14.1<br>(12.9–15.3)               | 130<br>(119–142)                  |
| Sweden                             | Male          | 7080<br>(6550–7720)                     | 15.1<br>(14.0–16.5)               | 138<br>(128–150)                  |
| Switzerland                        | Both          | 10200<br>(9530–11000)                   | 14.6<br>(13.7–15.7)               | 116<br>(109–125)                  |
| Switzerland                        | Female        | 3730<br>(3360–4220)                     | 10.4<br>(9.37–11.6)               | 84.7<br>(76.3–95.7)               |
| Switzerland                        | Male          | 6490<br>(6050–6960)                     | 19.2<br>(18.0–20.5)               | 148<br>(138–159)                  |
| United Kingdom                     | Both          | 120000<br>(114000–126000)               | 19.3<br>(18.4–20.2)               | 178<br>(170–187)                  |
| United Kingdom                     | Female        | 53200<br>(49800–56300)                  | 17.1<br>(16.0–18.1)               | 157<br>(147–166)                  |
| United Kingdom                     | Male          | 66600<br>(63300–70000)                  | 21.4<br>(20.5–22.5)               | 200<br>(190–211)                  |
| <b>Latin America and Caribbean</b> | <b>Both</b>   | <b>324000</b><br><b>(300000–352000)</b> | <b>9.07</b><br><b>(8.60–9.59)</b> | <b>55.5</b><br><b>(51.3–60.3)</b> |
| <b>Latin America and Caribbean</b> | <b>Female</b> | <b>106000</b><br><b>(96700–116000)</b>  | <b>6.62</b><br><b>(6.14–7.11)</b> | <b>35.5</b><br><b>(32.5–39.0)</b> |
| <b>Latin America and Caribbean</b> | <b>Male</b>   | <b>219000</b><br><b>(201000–239000)</b> | <b>11.0</b><br><b>(10.5–11.6)</b> | <b>76.4</b><br><b>(70.1–83.4)</b> |
| Andean Latin America               | Both          | 12800<br>(10600–15300)                  | 4.00<br>(3.68–4.35)               | 20.2<br>(16.6–24.1)               |
| Andean Latin America               | Female        | 2550<br>(2050–3150)                     | 1.70<br>(1.47–1.96)               | 8.02<br>(6.46–9.92)               |
| Andean Latin America               | Male          | 10300<br>(8380–12300)                   | 6.01<br>(5.52–6.55)               | 32.3<br>(26.3–38.6)               |
| Bolivia (Plurinational State of)   | Both          | 3530<br>(2760–4360)                     | 4.64<br>(4.16–5.12)               | 29.4<br>(23.0–36.3)               |
| Bolivia (Plurinational State of)   | Female        | 647<br>(484–856)                        | 1.73<br>(1.39–2.12)               | 10.8<br>(8.06–14.3)               |
| Bolivia (Plurinational State of)   | Male          | 2880<br>(2250–3560)                     | 7.47<br>(6.73–8.22)               | 47.9<br>(37.4–59.2)               |
| Ecuador                            | Both          | 4800<br>(3810–6140)                     | 5.19<br>(4.70–5.73)               | 27.3<br>(21.7–34.9)               |
| Ecuador                            | Female        | 1010<br>(775–1300)                      | 2.45<br>(2.06–2.94)               | 11.5<br>(8.78–14.8)               |

|                     |        |                        |                     |                     |
|---------------------|--------|------------------------|---------------------|---------------------|
| Ecuador             | Male   | 3790<br>(2980–4860)    | 7.40<br>(6.72–8.15) | 43.3<br>(34.1–55.6) |
| Peru                | Both   | 4490<br>(3320–6020)    | 2.94<br>(2.57–3.33) | 13.2<br>(9.78–17.7) |
| Peru                | Female | 890<br>(632–1240)      | 1.25<br>(1.00–1.54) | 5.24<br>(3.73–7.30) |
| Peru                | Male   | 3600<br>(2650–4840)    | 4.42<br>(3.86–5.06) | 21.1<br>(15.6–28.4) |
| Caribbean           | Both   | 40000<br>(34500–46600) | 10.6<br>(9.80–11.4) | 84.9<br>(73.2–98.7) |
| Caribbean           | Female | 12300<br>(10500–14500) | 7.03<br>(6.29–7.79) | 51.5<br>(43.9–60.6) |
| Caribbean           | Male   | 27700<br>(23800–32200) | 13.6<br>(12.7–14.6) | 119<br>(102–139)    |
| Antigua and Barbuda | Both   | 36.8<br>(31.0–43.9)    | 6.04<br>(5.45–6.71) | 41.6<br>(35.0–49.6) |
| Antigua and Barbuda | Female | 11.2<br>(8.93–14.0)    | 3.75<br>(3.09–4.60) | 24.7<br>(19.7–30.9) |
| Antigua and Barbuda | Male   | 25.7<br>(21.5–30.6)    | 8.20<br>(7.39–9.04) | 59.4<br>(49.7–70.7) |
| Bahamas             | Both   | 155<br>(126–192)       | 5.69<br>(5.09–6.36) | 41.2<br>(33.3–51.0) |
| Bahamas             | Female | 33.1<br>(25.1–42.7)    | 2.78<br>(2.25–3.41) | 17.0<br>(12.9–22.0) |
| Bahamas             | Male   | 122<br>(98.3–152)      | 7.95<br>(7.13–8.79) | 67.1<br>(53.9–83.6) |
| Barbados            | Both   | 157<br>(131–188)       | 5.07<br>(4.59–5.56) | 52.7<br>(43.9–63.2) |
| Barbados            | Female | 24.3<br>(18.8–31.5)    | 1.55<br>(1.28–1.87) | 15.8<br>(12.2–20.4) |
| Barbados            | Male   | 133<br>(110–159)       | 8.70<br>(7.88–9.60) | 92.4<br>(76.7–111)  |
| Belize              | Both   | 138<br>(118–160)       | 6.93<br>(6.33–7.58) | 33.7<br>(28.7–39.1) |
| Belize              | Female | 21.3<br>(17.1–26.5)    | 2.78<br>(2.29–3.34) | 10.4<br>(8.28–12.9) |
| Belize              | Male   | 117<br>(99.8–136)      | 9.54<br>(8.78–10.4) | 57.2<br>(48.9–66.6) |
| Bermuda             | Both   | 61.3<br>(51.8–74.0)    | 10.6<br>(9.74–11.4) | 95.7<br>(80.9–115)  |
| Bermuda             | Female | 14.8<br>(11.8–19.3)    | 5.97<br>(5.14–6.96) | 44.6<br>(35.6–58.3) |
| Bermuda             | Male   | 46.5<br>(39.4–55.5)    | 14.0<br>(12.9–15.1) | 150<br>(127–179)    |
| Cuba                | Both   | 20000<br>(16300–24100) | 18.8<br>(17.8–20.1) | 176<br>(144–212)    |
| Cuba                | Female | 6070<br>(4810–7520)    | 12.5<br>(10.9–14.3) | 106<br>(84.3–132)   |
| Cuba                | Male   | 13900<br>(11400–16900) | 24.2<br>(22.8–25.7) | 246<br>(201–299)    |
| Dominica            | Both   | 41.4<br>(33.8–50.6)    | 5.63<br>(5.14–6.15) | 60.3<br>(49.3–73.6) |
| Dominica            | Female | 8.29<br>(6.47–10.6)    | 2.47<br>(2.06–2.95) | 24.6<br>(19.2–31.6) |

|                                  |        |                      |                     |                     |
|----------------------------------|--------|----------------------|---------------------|---------------------|
| Dominica                         | Male   | 33.2<br>(26.9–40.7)  | 8.30<br>(7.53–9.09) | 94.6<br>(76.7–116)  |
| Dominican Republic               | Both   | 8200<br>(6480–10500) | 11.6<br>(10.6–12.7) | 75.4<br>(59.6–96.1) |
| Dominican Republic               | Female | 3070<br>(2420–3890)  | 10.5<br>(9.08–11.9) | 56.7<br>(44.8–71.9) |
| Dominican Republic               | Male   | 5140<br>(4000–6580)  | 12.4<br>(11.3–13.6) | 93.9<br>(73.2–120)  |
| Grenada                          | Both   | 54.7<br>(48.5–61.1)  | 6.69<br>(6.08–7.31) | 53.0<br>(47.0–59.2) |
| Grenada                          | Female | 11.6<br>(9.38–14.0)  | 3.02<br>(2.51–3.63) | 23.0<br>(18.6–27.9) |
| Grenada                          | Male   | 43.1<br>(38.2–48.4)  | 9.92<br>(9.04–10.9) | 81.6<br>(72.2–91.6) |
| Guyana                           | Both   | 423<br>(326–542)     | 6.32<br>(5.77–6.96) | 54.9<br>(42.3–70.3) |
| Guyana                           | Female | 82.5<br>(61.1–110)   | 2.85<br>(2.34–3.52) | 21.2<br>(15.7–28.2) |
| Guyana                           | Male   | 341<br>(260–436)     | 8.97<br>(8.17–9.82) | 89.3<br>(68.1–114)  |
| Haiti                            | Both   | 3120<br>(2350–4200)  | 3.12<br>(2.65–3.57) | 25.1<br>(18.9–33.9) |
| Haiti                            | Female | 891<br>(650–1250)    | 1.79<br>(1.43–2.19) | 13.9<br>(10.2–19.6) |
| Haiti                            | Male   | 2230<br>(1660–2980)  | 4.43<br>(3.68–5.16) | 37.0<br>(27.5–49.5) |
| Jamaica                          | Both   | 1720<br>(1370–2140)  | 8.75<br>(8.10–9.49) | 61.2<br>(48.9–76.2) |
| Jamaica                          | Female | 398<br>(308–509)     | 4.17<br>(3.53–4.86) | 28.1<br>(21.8–36.0) |
| Jamaica                          | Male   | 1320<br>(1050–1650)  | 13.1<br>(12.1–14.1) | 94.8<br>(75.0–118)  |
| Puerto Rico                      | Both   | 2790<br>(2140–3520)  | 8.46<br>(7.56–9.45) | 79.2<br>(60.7–99.9) |
| Puerto Rico                      | Female | 885<br>(682–1130)    | 5.62<br>(4.82–6.53) | 47.9<br>(36.9–61.4) |
| Puerto Rico                      | Male   | 1900<br>(1450–2430)  | 11.1<br>(9.96–12.3) | 114<br>(86.9–145)   |
| Saint Kitts and Nevis            | Both   | 25.2<br>(21.0–30.0)  | 5.05<br>(4.41–5.66) | 42.4<br>(35.3–50.3) |
| Saint Kitts and Nevis            | Female | 5.03<br>(3.85–6.49)  | 2.45<br>(1.95–3.05) | 17.0<br>(13.0–21.9) |
| Saint Kitts and Nevis            | Male   | 20.2<br>(16.7–24.0)  | 6.87<br>(5.89–7.73) | 67.7<br>(55.8–80.5) |
| Saint Lucia                      | Both   | 106<br>(89.6–124)    | 7.50<br>(6.92–8.08) | 60.4<br>(51.3–71.1) |
| Saint Lucia                      | Female | 19.7<br>(15.5–24.7)  | 3.21<br>(2.65–3.84) | 22.5<br>(17.6–28.1) |
| Saint Lucia                      | Male   | 85.8<br>(72.5–101)   | 10.8<br>(9.94–11.6) | 98.8<br>(83.5–116)  |
| Saint Vincent and the Grenadines | Both   | 61.6<br>(52.2–72.7)  | 6.00<br>(5.30–6.73) | 54.4<br>(46.1–64.2) |
| Saint Vincent and the Grenadines | Female | 11.5<br>(8.93–14.9)  | 2.58<br>(2.06–3.21) | 20.8<br>(16.2–26.9) |

|                                  |        |                         |                     |                     |
|----------------------------------|--------|-------------------------|---------------------|---------------------|
| Saint Vincent and the Grenadines | Male   | 50.1<br>(42.4–59.1)     | 8.63<br>(7.65–9.64) | 86.5<br>(73.4–102)  |
| Suriname                         | Both   | 451<br>(373–546)        | 10.3<br>(9.50–11.1) | 78.3<br>(64.8–94.8) |
| Suriname                         | Female | 105<br>(82.7–132)       | 5.33<br>(4.48–6.37) | 36.1<br>(28.4–45.5) |
| Suriname                         | Male   | 346<br>(286–417)        | 14.4<br>(13.3–15.5) | 121<br>(100–146)    |
| Trinidad and Tobago              | Both   | 1030<br>(761–1360)      | 8.72<br>(8.04–9.50) | 74.1<br>(54.9–97.8) |
| Trinidad and Tobago              | Female | 203<br>(147–282)        | 3.91<br>(3.23–4.72) | 29.4<br>(21.3–40.8) |
| Trinidad and Tobago              | Male   | 825<br>(613–1090)       | 12.5<br>(11.5–13.6) | 118<br>(88.0–156)   |
| United States Virgin Islands     | Both   | 109<br>(91.3–129)       | 8.54<br>(7.48–9.64) | 105<br>(87.8–124)   |
| United States Virgin Islands     | Female | 32.8<br>(26.0–40.3)     | 6.30<br>(5.24–7.49) | 59.9<br>(47.6–73.8) |
| United States Virgin Islands     | Male   | 76.5<br>(64.5–88.2)     | 10.1<br>(8.89–11.3) | 155<br>(131–179)    |
| Central Latin America            | Both   | 97100<br>(83900–113000) | 6.78<br>(6.37–7.20) | 38.8<br>(33.6–45.3) |
| Central Latin America            | Female | 26100<br>(22100–31000)  | 4.14<br>(3.73–4.53) | 20.4<br>(17.3–24.3) |
| Central Latin America            | Male   | 71000<br>(60500–83500)  | 8.85<br>(8.36–9.40) | 58.1<br>(49.5–68.4) |
| Colombia                         | Both   | 17300<br>(13400–22100)  | 7.00<br>(6.37–7.61) | 36.2<br>(28.0–46.3) |
| Colombia                         | Female | 6260<br>(4830–8070)     | 5.57<br>(4.77–6.44) | 25.6<br>(19.8–33.0) |
| Colombia                         | Male   | 11000<br>(8440–14400)   | 8.21<br>(7.51–8.93) | 47.2<br>(36.1–61.5) |
| Costa Rica                       | Both   | 2120<br>(1670–2670)     | 8.67<br>(8.12–9.31) | 44.9<br>(35.4–56.5) |
| Costa Rica                       | Female | 551<br>(433–701)        | 5.16<br>(4.47–5.90) | 22.7<br>(17.8–28.8) |
| Costa Rica                       | Male   | 1570<br>(1220–1980)     | 11.4<br>(10.7–12.2) | 68.6<br>(53.2–86.9) |
| El Salvador                      | Both   | 1700<br>(1280–2190)     | 4.24<br>(3.82–4.72) | 27.2<br>(20.5–35.0) |
| El Salvador                      | Female | 517<br>(372–703)        | 2.90<br>(2.34–3.49) | 15.6<br>(11.2–21.1) |
| El Salvador                      | Male   | 1190<br>(892–1530)      | 5.30<br>(4.76–5.85) | 40.5<br>(30.4–52.3) |
| Guatemala                        | Both   | 3790<br>(2870–4920)     | 3.99<br>(3.44–4.62) | 21.3<br>(16.2–27.7) |
| Guatemala                        | Female | 879<br>(628–1180)       | 2.10<br>(1.66–2.63) | 9.62<br>(6.88–12.9) |
| Guatemala                        | Male   | 2910<br>(2200–3780)     | 5.49<br>(4.77–6.31) | 33.7<br>(25.5–43.7) |
| Honduras                         | Both   | 4230<br>(3620–4960)     | 8.05<br>(7.06–9.05) | 43.1<br>(36.9–50.5) |
| Honduras                         | Female | 1040<br>(777–1380)      | 4.13<br>(3.21–5.25) | 20.6<br>(15.4–27.3) |

|                                     |               |                                   |                             |                             |
|-------------------------------------|---------------|-----------------------------------|-----------------------------|-----------------------------|
| Honduras                            | Male          | 3190<br>(2760–3670)               | 11·7<br>(10·3–13·3)         | 66·7<br>(57·7–76·8)         |
| Mexico                              | Both          | 48400<br>(40700–57000)            | 6·55<br>(6·00–7·12)         | 38·7<br>(32·6–45·6)         |
| Mexico                              | Female        | 11400<br>(9190–14100)             | 3·52<br>(3·10–3·97)         | 17·8<br>(14·4–22·0)         |
| Mexico                              | Male          | 37000<br>(29900–45000)            | 8·90<br>(8·30–9·61)         | 60·6<br>(48·9–73·7)         |
| Nicaragua                           | Both          | 1650<br>(1320–1980)               | 5·63<br>(5·06–6·20)         | 25·3<br>(20·3–30·4)         |
| Nicaragua                           | Female        | 264<br>(206–335)                  | 2·09<br>(1·69–2·53)         | 8·02<br>(6·26–10·2)         |
| Nicaragua                           | Male          | 1380<br>(1110–1660)               | 8·34<br>(7·55–9·17)         | 43·0<br>(34·4–51·6)         |
| Panama                              | Both          | 1180<br>(902–1520)                | 5·96<br>(5·41–6·58)         | 28·4<br>(21·7–36·4)         |
| Panama                              | Female        | 311<br>(231–410)                  | 3·63<br>(2·99–4·41)         | 15·1<br>(11·2–19·8)         |
| Panama                              | Male          | 871<br>(663–1130)                 | 7·75<br>(7·05–8·51)         | 41·6<br>(31·6–54·0)         |
| Venezuela (Bolivarian Republic of)  | Both          | 16800<br>(12700–21700)            | 8·96<br>(8·22–9·80)         | 59·7<br>(45·3–77·2)         |
| Venezuela (Bolivarian Republic of)  | Female        | 4900<br>(3670–6500)               | 6·23<br>(5·21–7·30)         | 34·3<br>(25·7–45·5)         |
| Venezuela (Bolivarian Republic of)  | Male          | 11900<br>(8900–15400)             | 10·9<br>(10·1–11·9)         | 86·2<br>(64·6–112)          |
| Tropical Latin America              | Both          | 175000<br>(164000–185000)         | 12·1<br>(11·5–12·8)         | 78·1<br>(73·5–82·9)         |
| Tropical Latin America              | Female        | 64700<br>(59500–70300)            | 10·1<br>(9·39–10·9)         | 56·6<br>(52·1–61·5)         |
| Tropical Latin America              | Male          | 110000<br>(103000–117000)         | 13·6<br>(13·0–14·4)         | 101<br>(94·3–107)           |
| Brazil                              | Both          | 170000<br>(160000–181000)         | 12·1<br>(11·5–12·8)         | 78·5<br>(74·0–83·5)         |
| Brazil                              | Female        | 63400<br>(58300–68900)            | 10·1<br>(9·43–11·0)         | 57·2<br>(52·6–62·2)         |
| Brazil                              | Male          | 107000<br>(100000–114000)         | 13·6<br>(13·0–14·3)         | 101<br>(94·5–108)           |
| Paraguay                            | Both          | 4410<br>(3430–5680)               | 12·9<br>(11·7–14·3)         | 63·7<br>(49·5–81·9)         |
| Paraguay                            | Female        | 1230<br>(938–1630)                | 8·45<br>(7·00–10·1)         | 36·0<br>(27·4–47·6)         |
| Paraguay                            | Male          | 3180<br>(2460–4070)               | 16·2<br>(15·0–17·7)         | 90·6<br>(70·0–116)          |
| <b>North Africa and Middle East</b> | <b>Both</b>   | <b>374000<br/>(336000–417000)</b> | <b>12·1<br/>(11·6–12·7)</b> | <b>61·5<br/>(55·1–68·6)</b> |
| <b>North Africa and Middle East</b> | <b>Female</b> | <b>45300<br/>(40500–51000)</b>    | <b>3·37<br/>(3·12–3·66)</b> | <b>15·5<br/>(13·9–17·4)</b> |
| <b>North Africa and Middle East</b> | <b>Male</b>   | <b>329000<br/>(294000–368000)</b> | <b>18·7<br/>(17·9–19·8)</b> | <b>104<br/>(92·9–116)</b>   |
| North Africa and Middle East        | Both          | 374000<br>(336000–417000)         | 12·1<br>(11·6–12·7)         | 61·5<br>(55·1–68·6)         |
| North Africa and Middle East        | Female        | 45300<br>(40500–51000)            | 3·37<br>(3·12–3·66)         | 15·5<br>(13·9–17·4)         |

|                              |        |                           |                      |                     |
|------------------------------|--------|---------------------------|----------------------|---------------------|
| North Africa and Middle East | Male   | 329000<br>(294000–368000) | 18.7<br>(17.9–19.8)  | 104<br>(92.9–116)   |
| Afghanistan                  | Both   | 10300<br>(7830–13000)     | 4.09<br>(3.41–4.71)  | 26.9<br>(20.4–33.9) |
| Afghanistan                  | Female | 1970<br>(1370–2750)       | 1.57<br>(1.20–2.07)  | 10.5<br>(7.36–14.8) |
| Afghanistan                  | Male   | 8340<br>(6320–10400)      | 6.58<br>(5.45–7.59)  | 42.5<br>(32.2–52.8) |
| Algeria                      | Both   | 21600<br>(17700–26100)    | 10.7<br>(9.95–11.7)  | 51.5<br>(42.2–62.3) |
| Algeria                      | Female | 1930<br>(1450–2550)       | 2.04<br>(1.62–2.57)  | 9.34<br>(7.03–12.4) |
| Algeria                      | Male   | 19600<br>(16100–23800)    | 18.4<br>(17.1–20.0)  | 92.6<br>(75.9–112)  |
| Bahrain                      | Both   | 545<br>(434–677)          | 12.8<br>(11.5–14.2)  | 37.8<br>(30.1–46.9) |
| Bahrain                      | Female | 79.6<br>(58.2–107)        | 4.83<br>(3.75–6.15)  | 14.6<br>(10.7–19.7) |
| Bahrain                      | Male   | 466<br>(367–579)          | 17.8<br>(16.1–19.6)  | 51.9<br>(40.9–64.5) |
| Egypt                        | Both   | 74000<br>(57400–96200)    | 13.2<br>(12.0–14.7)  | 74.7<br>(57.9–97.1) |
| Egypt                        | Female | 2780<br>(1920–3880)       | 1.18<br>(0.893–1.54) | 5.84<br>(4.03–8.13) |
| Egypt                        | Male   | 71200<br>(55100–92900)    | 21.8<br>(19.9–24.3)  | 139<br>(107–181)    |
| Iran (Islamic Republic of)   | Both   | 39900<br>(37300–43000)    | 10.2<br>(9.61–10.9)  | 47.4<br>(44.3–51.0) |
| Iran (Islamic Republic of)   | Female | 5480<br>(4530–6490)       | 3.29<br>(2.74–3.91)  | 13.2<br>(10.9–15.6) |
| Iran (Islamic Republic of)   | Male   | 34400<br>(32100–37300)    | 15.3<br>(14.5–16.4)  | 80.5<br>(75.0–87.1) |
| Iraq                         | Both   | 25200<br>(19600–30300)    | 14.0<br>(12.9–15.0)  | 59.8<br>(46.5–71.9) |
| Iraq                         | Female | 4010<br>(3070–5130)       | 5.33<br>(4.47–6.29)  | 19.5<br>(14.9–25.0) |
| Iraq                         | Male   | 21200<br>(16400–25400)    | 20.3<br>(18.9–21.7)  | 98.2<br>(76.2–118)  |
| Jordan                       | Both   | 4740<br>(3860–5770)       | 14.7<br>(12.9–16.4)  | 40.7<br>(33.2–49.6) |
| Jordan                       | Female | 767<br>(610–956)          | 5.56<br>(4.84–6.33)  | 14.1<br>(11.2–17.6) |
| Jordan                       | Male   | 3980<br>(3140–4970)       | 21.5<br>(19.9–23.0)  | 64.0<br>(50.5–79.9) |
| Kuwait                       | Both   | 1520<br>(1250–1850)       | 15.2<br>(13.9–16.6)  | 34.4<br>(28.2–41.8) |
| Kuwait                       | Female | 86.1<br>(65.1–114)        | 2.92<br>(2.33–3.66)  | 4.19<br>(3.17–5.54) |
| Kuwait                       | Male   | 1440<br>(1160–1760)       | 20.3<br>(19.1–21.8)  | 60.6<br>(49.0–74.3) |
| Lebanon                      | Both   | 7810<br>(6800–8900)       | 23.1<br>(21.5–24.9)  | 151<br>(131–172)    |
| Lebanon                      | Female | 2730<br>(2350–3170)       | 18.2<br>(16.3–20.3)  | 104<br>(89.2–121)   |

|                      |        |                        |                       |                     |
|----------------------|--------|------------------------|-----------------------|---------------------|
| Lebanon              | Male   | 5080<br>(4420–5790)    | 26·9<br>(25·2–28·9)   | 199<br>(174–227)    |
| Libya                | Both   | 3660<br>(2960–4610)    | 11·6<br>(10·7–12·7)   | 54·4<br>(44·0–68·4) |
| Libya                | Female | 111<br>(79·1–154)      | 0·813<br>(0·615–1·07) | 3·42<br>(2·43–4·73) |
| Libya                | Male   | 3550<br>(2870–4460)    | 19·7<br>(18·4–21·8)   | 102<br>(82·5–128)   |
| Morocco              | Both   | 21400<br>(16300–25300) | 9·36<br>(8·46–10·3)   | 59·5<br>(45·5–70·5) |
| Morocco              | Female | 1400<br>(1020–1860)    | 1·34<br>(1·07–1·68)   | 7·81<br>(5·71–10·4) |
| Morocco              | Male   | 20000<br>(15200–23800) | 16·1<br>(14·8–17·8)   | 111<br>(84·0–131)   |
| Oman                 | Both   | 812<br>(702–945)       | 6·55<br>(5·96–7·27)   | 17·7<br>(15·3–20·6) |
| Oman                 | Female | 90·8<br>(67·1–119)     | 2·02<br>(1·54–2·61)   | 5·57<br>(4·12–7·33) |
| Oman                 | Male   | 721<br>(616–847)       | 9·15<br>(8·39–10·0)   | 24·4<br>(20·9–28·7) |
| Palestine            | Both   | 2190<br>(1870–2550)    | 13·2<br>(12·1–14·3)   | 44·1<br>(37·7–51·4) |
| Palestine            | Female | 210<br>(159–270)       | 2·73<br>(2·13–3·43)   | 8·62<br>(6·54–11·1) |
| Palestine            | Male   | 1980<br>(1690–2310)    | 22·1<br>(20·5–23·9)   | 78·2<br>(67·1–91·3) |
| Qatar                | Both   | 418<br>(316–543)       | 9·44<br>(8·55–10·6)   | 14·6<br>(11·0–19·0) |
| Qatar                | Female | 15·6<br>(10·7–22·2)    | 1·44<br>(1·06–1·93)   | 2·15<br>(1·46–3·06) |
| Qatar                | Male   | 402<br>(304–523)       | 12·0<br>(10·9–13·4)   | 18·8<br>(14·2–24·5) |
| Saudi Arabia         | Both   | 12300<br>(9710–15200)  | 9·55<br>(8·55–10·8)   | 34·3<br>(27·2–42·7) |
| Saudi Arabia         | Female | 948<br>(659–1310)      | 2·21<br>(1·67–2·85)   | 6·37<br>(4·43–8·77) |
| Saudi Arabia         | Male   | 11300<br>(8970–14000)  | 13·2<br>(11·9–14·9)   | 54·3<br>(43·0–67·4) |
| Sudan                | Both   | 16100<br>(12600–20500) | 7·98<br>(6·67–9·33)   | 39·6<br>(31·0–50·4) |
| Sudan                | Female | 1670<br>(1160–2390)    | 1·97<br>(1·39–2·68)   | 8·30<br>(5·74–11·9) |
| Sudan                | Male   | 14500<br>(11400–18600) | 12·3<br>(10·3–14·3)   | 70·0<br>(54·9–89·7) |
| Syrian Arab Republic | Both   | 13200<br>(9920–17600)  | 15·6<br>(14·4–17·0)   | 91·4<br>(68·5–121)  |
| Syrian Arab Republic | Female | 1860<br>(1310–2540)    | 5·15<br>(4·13–6·36)   | 25·0<br>(17·7–34·2) |
| Syrian Arab Republic | Male   | 11400<br>(8570–15300)  | 23·4<br>(21·7–25·2)   | 161<br>(121–217)    |
| Tunisia              | Both   | 10900<br>(8220–14100)  | 16·0<br>(15·0–17·3)   | 93·8<br>(71·0–122)  |
| Tunisia              | Female | 779<br>(544–1070)      | 2·65<br>(2·08–3·26)   | 13·4<br>(9·37–18·4) |

|                      |               |                                            |                                   |                                   |
|----------------------|---------------|--------------------------------------------|-----------------------------------|-----------------------------------|
| Tunisia              | Male          | 10100<br>(7630–13200)                      | 26.3<br>(24.8–28.2)               | 175<br>(132–229)                  |
| Turkey               | Both          | 86200<br>(69400–105000)                    | 18.9<br>(18.0–19.9)               | 106<br>(85.3–129)                 |
| Turkey               | Female        | 13900<br>(11100–17100)                     | 6.66<br>(5.99–7.39)               | 34.5<br>(27.6–42.5)               |
| Turkey               | Male          | 72300<br>(58700–88600)                     | 29.3<br>(27.9–30.6)               | 176<br>(143–215)                  |
| United Arab Emirates | Both          | 3730<br>(2740–4910)                        | 12.8<br>(11.0–14.7)               | 40.3<br>(29.6–53.2)               |
| United Arab Emirates | Female        | 203<br>(143–280)                           | 4.01<br>(3.14–5.07)               | 8.01<br>(5.65–11.1)               |
| United Arab Emirates | Male          | 3520<br>(2580–4660)                        | 14.6<br>(12.6–16.9)               | 52.5<br>(38.4–69.4)               |
| Yemen                | Both          | 17300<br>(13700–22500)                     | 9.90<br>(8.66–11.2)               | 54.9<br>(43.6–71.3)               |
| Yemen                | Female        | 4290<br>(3310–5730)                        | 5.61<br>(4.70–6.67)               | 27.6<br>(21.3–36.8)               |
| Yemen                | Male          | 13000<br>(10300–17100)                     | 13.2<br>(11.6–15.2)               | 81.7<br>(64.5–107)                |
| <b>South Asia</b>    | <b>Both</b>   | <b>1290000</b><br><b>(1120000–1480000)</b> | <b>10.8</b><br><b>(9.78–11.8)</b> | <b>71.3</b><br><b>(61.8–81.8)</b> |
| <b>South Asia</b>    | <b>Female</b> | <b>207000</b><br><b>(161000–253000)</b>    | <b>3.73</b><br><b>(3.00–4.39)</b> | <b>23.4</b><br><b>(18.2–28.7)</b> |
| <b>South Asia</b>    | <b>Male</b>   | <b>1080000</b><br><b>(921000–1260000)</b>  | <b>16.9</b><br><b>(15.7–17.8)</b> | <b>117</b><br><b>(99.9–137)</b>   |
| South Asia           | Both          | 1290000<br>(1120000–1480000)               | 10.8<br>(9.78–11.8)               | 71.3<br>(61.8–81.8)               |
| South Asia           | Female        | 207000<br>(161000–253000)                  | 3.73<br>(3.00–4.39)               | 23.4<br>(18.2–28.7)               |
| South Asia           | Male          | 1080000<br>(921000–1260000)                | 16.9<br>(15.7–17.8)               | 117<br>(99.9–137)                 |
| Bangladesh           | Both          | 106000<br>(84800–129000)                   | 12.4<br>(11.5–14.0)               | 66.4<br>(53.2–81.1)               |
| Bangladesh           | Female        | 8480<br>(6290–11300)                       | 2.30<br>(1.81–2.98)               | 10.5<br>(7.80–14.0)               |
| Bangladesh           | Male          | 97200<br>(77900–119000)                    | 20.2<br>(18.8–22.6)               | 124<br>(99.1–151)                 |
| Bhutan               | Both          | 332<br>(256–419)                           | 7.82<br>(6.49–9.49)               | 44.0<br>(33.9–55.5)               |
| Bhutan               | Female        | 74.0<br>(53.9–98.8)                        | 3.85<br>(2.91–4.96)               | 20.5<br>(14.9–27.3)               |
| Bhutan               | Male          | 258<br>(195–333)                           | 11.1<br>(9.09–13.7)               | 65.7<br>(49.7–84.8)               |
| India                | Both          | 1010000<br>(853000–1200000)                | 10.8<br>(9.56–12.0)               | 72.9<br>(61.3–86.1)               |
| India                | Female        | 169000<br>(126000–214000)                  | 3.85<br>(3.02–4.63)               | 24.9<br>(18.6–31.6)               |
| India                | Male          | 845000<br>(695000–1020000)                 | 16.9<br>(15.4–18.0)               | 118<br>(97.4–143)                 |
| Nepal                | Both          | 34200<br>(27700–39300)                     | 17.7<br>(16.0–19.2)               | 112<br>(91.2–129)                 |
| Nepal                | Female        | 12800<br>(9930–15200)                      | 14.6<br>(12.1–16.9)               | 80.7<br>(62.4–95.8)               |



|                                               |               |                                      |                             |                             |
|-----------------------------------------------|---------------|--------------------------------------|-----------------------------|-----------------------------|
| Nepal                                         | Male          | 21400<br>(17100–24800)               | 20·2<br>(18·1–22·0)         | 147<br>(118–171)            |
| Pakistan                                      | Both          | 134000<br>(107000–167000)            | 8·94<br>(7·44–10·6)         | 59·9<br>(47·9–74·7)         |
| Pakistan                                      | Female        | 16500<br>(12600–21900)               | 2·39<br>(1·94–2·95)         | 15·1<br>(11·5–20·1)         |
| Pakistan                                      | Male          | 118000<br>(89600–152000)             | 14·5<br>(12·5–16·3)         | 103<br>(78·0–132)           |
| <b>Southeast Asia, East Asia, and Oceania</b> | <b>Both</b>   | <b>3120000<br/>(2740000–3550000)</b> | <b>20·1<br/>(18·5–21·5)</b> | <b>145<br/>(127–165)</b>    |
| <b>Southeast Asia, East Asia, and Oceania</b> | <b>Female</b> | <b>413000<br/>(346000–487000)</b>    | <b>6·23<br/>(5·65–6·91)</b> | <b>38·7<br/>(32·5–45·7)</b> |
| <b>Southeast Asia, East Asia, and Oceania</b> | <b>Male</b>   | <b>2710000<br/>(2310000–3150000)</b> | <b>30·3<br/>(29·2–31·5)</b> | <b>248<br/>(211–288)</b>    |
| East Asia                                     | Both          | 2490000<br>(2100000–2930000)         | 22·5<br>(20·5–24·3)         | 169<br>(142–199)            |
| East Asia                                     | Female        | 334000<br>(271000–408000)            | 7·22<br>(6·50–8·07)         | 46·2<br>(37·4–56·5)         |
| East Asia                                     | Male          | 2160000<br>(1770000–2600000)         | 33·4<br>(32·4–34·5)         | 288<br>(236–346)            |
| China                                         | Both          | 2420000<br>(2030000–2870000)         | 22·7<br>(20·7–24·6)         | 170<br>(143–202)            |
| China                                         | Female        | 326000<br>(263000–400000)            | 7·35<br>(6·62–8·25)         | 46·7<br>(37·7–57·4)         |
| China                                         | Male          | 2090000<br>(1710000–2530000)         | 33·6<br>(32·6–34·8)         | 289<br>(236–349)            |
| Democratic People's Republic of Korea         | Both          | 43800<br>(37700–49600)               | 18·5<br>(17·0–19·8)         | 167<br>(144–189)            |
| Democratic People's Republic of Korea         | Female        | 6940<br>(5140–9140)                  | 5·75<br>(4·43–7·26)         | 52·6<br>(39·0–69·3)         |
| Democratic People's Republic of Korea         | Male          | 36800<br>(31900–41300)               | 31·7<br>(29·3–33·7)         | 282<br>(244–316)            |
| Taiwan (Province of China)                    | Both          | 26600<br>(21300–34200)               | 14·4<br>(13·5–15·2)         | 113<br>(90·0–145)           |
| Taiwan (Province of China)                    | Female        | 1480<br>(1070–2030)                  | 1·91<br>(1·54–2·35)         | 12·4<br>(9·00–17·1)         |
| Taiwan (Province of China)                    | Male          | 25200<br>(20100–32300)               | 23·2<br>(21·9–24·5)         | 215<br>(171–276)            |
| Oceania                                       | Both          | 11000<br>(8920–13700)                | 11·4<br>(10·3–12·5)         | 83·1<br>(67·2–103)          |
| Oceania                                       | Female        | 3080<br>(2390–3920)                  | 7·40<br>(6·33–8·58)         | 47·9<br>(37·2–60·9)         |
| Oceania                                       | Male          | 7950<br>(6430–9810)                  | 14·3<br>(13·0–15·6)         | 116<br>(94·0–143)           |
| American Samoa                                | Both          | 55·0<br>(46·5–63·6)                  | 14·4<br>(13·2–15·7)         | 99·0<br>(83·7–115)          |
| American Samoa                                | Female        | 15·1<br>(12·0–19·0)                  | 8·87<br>(7·57–10·3)         | 54·9<br>(43·4–68·8)         |
| American Samoa                                | Male          | 39·8<br>(34·0–45·2)                  | 18·7<br>(17·3–20·4)         | 143<br>(122–162)            |
| Cook Islands                                  | Both          | 21·3<br>(17·9–25·3)                  | 12·9<br>(11·6–14·2)         | 119<br>(99·7–141)           |
| Cook Islands                                  | Female        | 4·80<br>(3·55–6·26)                  | 7·11<br>(5·75–8·60)         | 52·1<br>(38·5–68·0)         |

|                                  |        |                        |                     |                     |
|----------------------------------|--------|------------------------|---------------------|---------------------|
| Cook Islands                     | Male   | 16.5<br>(14.1–19.3)    | 16.9<br>(15.2–18.6) | 188<br>(161–220)    |
| Fiji                             | Both   | 924<br>(722–1160)      | 12.4<br>(11.5–13.4) | 101<br>(79.3–128)   |
| Fiji                             | Female | 184<br>(138–241)       | 5.49<br>(4.68–6.41) | 41.0<br>(30.7–53.6) |
| Fiji                             | Male   | 740<br>(576–927)       | 18.2<br>(16.8–19.5) | 160<br>(125–201)    |
| Guam                             | Both   | 159<br>(131–191)       | 14.1<br>(12.7–15.5) | 93.0<br>(76.5–112)  |
| Guam                             | Female | 46.0<br>(36.8–56.6)    | 9.48<br>(8.12–10.9) | 55.6<br>(44.5–68.4) |
| Guam                             | Male   | 113<br>(93.2–136)      | 17.5<br>(16.0–19.2) | 128<br>(106–154)    |
| Kiribati                         | Both   | 252<br>(199–308)       | 21.9<br>(20.2–23.4) | 213<br>(168–260)    |
| Kiribati                         | Female | 91.2<br>(70.6–113)     | 17.3<br>(15.4–19.2) | 151<br>(117–187)    |
| Kiribati                         | Male   | 161<br>(127–198)       | 25.8<br>(23.9–27.6) | 277<br>(218–341)    |
| Marshall Islands                 | Both   | 52.9<br>(40.8–66.5)    | 12.5<br>(11.0–14.3) | 93.0<br>(71.7–117)  |
| Marshall Islands                 | Female | 10.8<br>(7.67–14.4)    | 5.96<br>(4.68–7.53) | 38.9<br>(27.6–51.8) |
| Marshall Islands                 | Male   | 42.1<br>(32.6–53.5)    | 17.4<br>(15.4–19.6) | 145<br>(112–184)    |
| Micronesia (Federated States of) | Both   | 167<br>(118–213)       | 17.8<br>(13.4–20.4) | 164<br>(116–208)    |
| Micronesia (Federated States of) | Female | 52.2<br>(38.3–68.8)    | 12.7<br>(10.1–15.2) | 104<br>(76.4–137)   |
| Micronesia (Federated States of) | Male   | 115<br>(77.1–146)      | 21.8<br>(15.4–24.8) | 221<br>(148–282)    |
| Nauru                            | Both   | 11.1<br>(9.02–13.6)    | 16.7<br>(14.9–18.5) | 105<br>(85.5–129)   |
| Nauru                            | Female | 4.36<br>(3.26–5.72)    | 16.1<br>(13.8–18.5) | 83.5<br>(62.4–110)  |
| Nauru                            | Male   | 6.77<br>(5.18–8.49)    | 17.0<br>(15.2–19.1) | 127<br>(97.2–159)   |
| Niue                             | Both   | 2.54<br>(2.08–2.99)    | 12.7<br>(11.4–14.2) | 152<br>(124–179)    |
| Niue                             | Female | 0.694<br>(0.518–0.916) | 7.36<br>(6.05–8.95) | 83.4<br>(62.3–110)  |
| Niue                             | Male   | 1.84<br>(1.55–2.11)    | 17.5<br>(15.8–19.5) | 220<br>(185–251)    |
| Northern Mariana Islands         | Both   | 59.9<br>(50.9–69.1)    | 17.1<br>(15.6–18.7) | 141<br>(120–163)    |
| Northern Mariana Islands         | Female | 11.5<br>(8.65–15.0)    | 8.71<br>(6.95–10.8) | 56.0<br>(42.1–73.2) |
| Northern Mariana Islands         | Male   | 48.4<br>(41.4–54.7)    | 22.2<br>(20.4–24.0) | 221<br>(189–249)    |
| Palau                            | Both   | 30.2<br>(23.5–38.3)    | 14.5<br>(13.0–16.3) | 168<br>(130–213)    |
| Palau                            | Female | 6.72<br>(4.78–9.04)    | 8.16<br>(6.59–9.99) | 82.1<br>(58.4–110)  |

|                  |        |                           |                     |                     |
|------------------|--------|---------------------------|---------------------|---------------------|
| Palau            | Male   | 23.5<br>(18.5–29.7)       | 18.6<br>(16.7–20.8) | 239<br>(188–302)    |
| Papua New Guinea | Both   | 7150<br>(5460–9310)       | 10.2<br>(8.92–11.7) | 72.5<br>(55.4–94.3) |
| Papua New Guinea | Female | 2140<br>(1550–2860)       | 7.21<br>(5.92–8.70) | 44.9<br>(32.6–60.0) |
| Papua New Guinea | Male   | 5020<br>(3810–6500)       | 12.5<br>(10.9–14.1) | 98.2<br>(74.6–127)  |
| Samoa            | Both   | 234<br>(196–283)          | 17.1<br>(15.6–18.6) | 111<br>(92.9–134)   |
| Samoa            | Female | 69.3<br>(52.8–90.3)       | 10.6<br>(9.11–12.3) | 67.5<br>(51.5–88.0) |
| Samoa            | Male   | 164<br>(142–194)          | 23.0<br>(21.1–24.8) | 151<br>(130–178)    |
| Solomon Islands  | Both   | 1030<br>(827–1250)        | 16.5<br>(15.3–17.8) | 157<br>(126–191)    |
| Solomon Islands  | Female | 256<br>(194–321)          | 9.42<br>(8.01–10.8) | 79.7<br>(60.5–99.9) |
| Solomon Islands  | Male   | 770<br>(619–939)          | 22.0<br>(20.3–23.7) | 230<br>(185–281)    |
| Tokelau          | Both   | 1.45<br>(1.17–1.82)       | 13.1<br>(11.4–14.6) | 103<br>(82.8–129)   |
| Tokelau          | Female | 0.513<br>(0.371–0.703)    | 8.36<br>(6.63–10.3) | 74.6<br>(53.9–102)  |
| Tokelau          | Male   | 0.938<br>(0.775–1.15)     | 18.8<br>(16.6–20.7) | 130<br>(107–159)    |
| Tonga            | Both   | 99.8<br>(83.1–118)        | 15.2<br>(13.9–16.4) | 97.5<br>(81.2–115)  |
| Tonga            | Female | 17.0<br>(12.7–21.8)       | 5.89<br>(4.79–7.14) | 33.1<br>(24.8–42.4) |
| Tonga            | Male   | 82.8<br>(69.6–96.9)       | 22.5<br>(20.8–24.3) | 163<br>(137–190)    |
| Tuvalu           | Both   | 16.7<br>(13.1–21.7)       | 15.6<br>(13.9–17.2) | 142<br>(111–184)    |
| Tuvalu           | Female | 5.22<br>(3.73–6.91)       | 10.2<br>(8.36–12.2) | 92.0<br>(65.8–122)  |
| Tuvalu           | Male   | 11.5<br>(9.15–14.9)       | 20.4<br>(18.4–22.4) | 187<br>(149–243)    |
| Vanuatu          | Both   | 247<br>(201–314)          | 11.0<br>(10.2–12.0) | 83.9<br>(68.1–107)  |
| Vanuatu          | Female | 22.7<br>(16.2–30.8)       | 2.55<br>(2.02–3.16) | 15.6<br>(11.1–21.2) |
| Vanuatu          | Male   | 224<br>(183–285)          | 16.6<br>(15.4–18.0) | 150<br>(122–191)    |
| Southeast Asia   | Both   | 623000<br>(560000–689000) | 14.2<br>(13.3–15.1) | 92.5<br>(83.1–102)  |
| Southeast Asia   | Female | 75800<br>(66500–85600)    | 3.88<br>(3.52–4.27) | 22.5<br>(19.7–25.4) |
| Southeast Asia   | Male   | 547000<br>(486000–610000) | 22.5<br>(21.4–23.4) | 163<br>(144–181)    |
| Cambodia         | Both   | 16500<br>(13300–18900)    | 14.8<br>(13.6–16.0) | 99.1<br>(80.1–114)  |
| Cambodia         | Female | 2580<br>(2030–3150)       | 4.86<br>(4.08–5.76) | 30.5<br>(24.1–37.2) |

|                                  |        |                           |                     |                     |
|----------------------------------|--------|---------------------------|---------------------|---------------------|
| Cambodia                         | Male   | 13900<br>(11200–15800)    | 24.0<br>(22.1–25.8) | 170<br>(138–194)    |
| Indonesia                        | Both   | 246000<br>(203000–295000) | 14.4<br>(12.7–16.0) | 94.9<br>(78.1–114)  |
| Indonesia                        | Female | 22800<br>(17400–28200)    | 2.92<br>(2.52–3.37) | 17.7<br>(13.6–21.9) |
| Indonesia                        | Male   | 224000<br>(181000–272000) | 24.1<br>(22.7–25.4) | 171<br>(138–208)    |
| Lao People's Democratic Republic | Both   | 5850<br>(4740–6980)       | 13.2<br>(11.8–14.4) | 81.7<br>(66.2–97.5) |
| Lao People's Democratic Republic | Female | 731<br>(543–948)          | 3.74<br>(2.97–4.66) | 20.5<br>(15.2–26.6) |
| Lao People's Democratic Republic | Male   | 5120<br>(4150–6120)       | 20.6<br>(18.5–22.3) | 142<br>(115–170)    |
| Malaysia                         | Both   | 24600<br>(19700–30400)    | 14.0<br>(13.1–14.8) | 78.6<br>(62.9–97.0) |
| Malaysia                         | Female | 1880<br>(1450–2430)       | 2.59<br>(2.12–3.17) | 12.5<br>(9.57–16.1) |
| Malaysia                         | Male   | 22700<br>(18100–28200)    | 22.0<br>(20.7–23.3) | 140<br>(112–174)    |
| Maldives                         | Both   | 205<br>(173–239)          | 13.6<br>(12.7–14.6) | 41.1<br>(34.6–47.9) |
| Maldives                         | Female | 24.2<br>(18.2–31.7)       | 4.09<br>(3.25–5.17) | 12.2<br>(9.17–16.0) |
| Maldives                         | Male   | 181<br>(153–212)          | 19.9<br>(18.4–21.2) | 60.3<br>(51.1–70.5) |
| Mauritius                        | Both   | 1040<br>(843–1270)        | 9.71<br>(9.12–10.3) | 81.5<br>(66.1–99.6) |
| Mauritius                        | Female | 96.2<br>(71.9–125)        | 1.97<br>(1.58–2.42) | 14.9<br>(11.1–19.3) |
| Mauritius                        | Male   | 945<br>(768–1150)         | 16.2<br>(15.3–17.2) | 150<br>(122–183)    |
| Myanmar                          | Both   | 60000<br>(51900–70100)    | 14.3<br>(12.9–15.6) | 110<br>(95.0–128)   |
| Myanmar                          | Female | 15400<br>(12800–18400)    | 8.02<br>(6.70–9.28) | 54.4<br>(45.2–65.0) |
| Myanmar                          | Male   | 44600<br>(38700–52400)    | 19.6<br>(17.9–21.2) | 170<br>(147–199)    |
| Philippines                      | Both   | 95600<br>(77000–118000)   | 14.9<br>(13.3–16.6) | 85.2<br>(68.7–105)  |
| Philippines                      | Female | 17500<br>(13700–22300)    | 6.39<br>(5.68–7.11) | 31.7<br>(24.8–40.3) |
| Philippines                      | Male   | 78100<br>(60400–101000)   | 21.3<br>(20.0–22.6) | 137<br>(106–178)    |
| Seychelles                       | Both   | 106<br>(91.7–121)         | 13.3<br>(12.1–14.5) | 103<br>(89.8–118)   |
| Seychelles                       | Female | 10.8<br>(8.30–14.0)       | 3.21<br>(2.53–4.00) | 22.3<br>(17.1–28.9) |
| Seychelles                       | Male   | 94.9<br>(82.1–109)        | 20.6<br>(19.2–22.0) | 177<br>(153–203)    |
| Sri Lanka                        | Both   | 11100<br>(8360–14400)     | 8.15<br>(7.48–8.78) | 50.7<br>(38.3–65.8) |
| Sri Lanka                        | Female | 972<br>(679–1320)         | 1.58<br>(1.26–1.95) | 8.61<br>(6.01–11.7) |

|                                  |               |                                         |                                    |                                   |
|----------------------------------|---------------|-----------------------------------------|------------------------------------|-----------------------------------|
| Sri Lanka                        | Male          | 10100<br>(7620–13100)                   | 13·6<br>(12·5–14·6)                | 95·6<br>(72·1–124)                |
| Thailand                         | Both          | 62900<br>(47100–81500)                  | 12·6<br>(11·8–13·5)                | 89·7<br>(67·2–116)                |
| Thailand                         | Female        | 6980<br>(5210–9130)                     | 3·21<br>(2·75–3·77)                | 19·4<br>(14·5–25·4)               |
| Thailand                         | Male          | 55900<br>(41700–72700)                  | 19·9<br>(18·7–21·2)                | 163<br>(122–213)                  |
| Timor-Leste                      | Both          | 928<br>(714–1120)                       | 12·0<br>(9·88–13·9)                | 69·5<br>(53·5–83·6)               |
| Timor-Leste                      | Female        | 83·5<br>(57·9–117)                      | 2·45<br>(1·75–3·35)                | 12·7<br>(8·78–17·7)               |
| Timor-Leste                      | Male          | 844<br>(643–1010)                       | 19·4<br>(16·0–22·4)                | 125<br>(95·2–150)                 |
| Viet Nam                         | Both          | 97100<br>(81500–112000)                 | 15·4<br>(14·4–16·3)                | 101<br>(84·6–117)                 |
| Viet Nam                         | Female        | 6620<br>(5080–8460)                     | 2·44<br>(1·96–3·00)                | 13·6<br>(10·5–17·4)               |
| Viet Nam                         | Male          | 90500<br>(76100–105000)                 | 25·1<br>(23·6–26·6)                | 189<br>(159–220)                  |
| <b>Sub-Saharan Africa</b>        | <b>Both</b>   | <b>220000</b><br><b>(192000–251000)</b> | <b>2·87</b><br><b>(2·56–3·19)</b>  | <b>20·4</b><br><b>(17·8–23·3)</b> |
| <b>Sub-Saharan Africa</b>        | <b>Female</b> | <b>35600</b><br><b>(30300–41200)</b>    | <b>1·02</b><br><b>(0·874–1·15)</b> | <b>6·50</b><br><b>(5·53–7·54)</b> |
| <b>Sub-Saharan Africa</b>        | <b>Male</b>   | <b>184000</b><br><b>(161000–210000)</b> | <b>4·44</b><br><b>(3·94–4·95)</b>  | <b>34·7</b><br><b>(30·3–39·6)</b> |
| Central Sub-Saharan Africa       | Both          | 27400<br>(21800–34200)                  | 3·13<br>(2·72–3·57)                | 20·8<br>(16·5–26·0)               |
| Central Sub-Saharan Africa       | Female        | 2930<br>(2170–3880)                     | 0·727<br>(0·580–0·897)             | 4·43<br>(3·28–5·86)               |
| Central Sub-Saharan Africa       | Male          | 24400<br>(19400–30600)                  | 5·20<br>(4·45–5·92)                | 37·4<br>(29·7–46·8)               |
| Angola                           | Both          | 7510<br>(6100–9400)                     | 4·06<br>(3·66–4·50)                | 24·9<br>(20·2–31·2)               |
| Angola                           | Female        | 949<br>(672–1300)                       | 1·12<br>(0·838–1·43)               | 6·12<br>(4·33–8·36)               |
| Angola                           | Male          | 6560<br>(5330–8190)                     | 6·56<br>(5·89–7·27)                | 44·9<br>(36·4–56·0)               |
| Central African Republic         | Both          | 1970<br>(1480–2580)                     | 2·91<br>(2·48–3·40)                | 37·3<br>(28·0–48·7)               |
| Central African Republic         | Female        | 170<br>(110–254)                        | 0·566<br>(0·413–0·758)             | 6·30<br>(4·07–9·40)               |
| Central African Republic         | Male          | 1800<br>(1350–2350)                     | 4·77<br>(4·08–5·59)                | 69·5<br>(52·1–90·7)               |
| Congo                            | Both          | 1430<br>(1130–1790)                     | 4·01<br>(3·45–4·51)                | 27·2<br>(21·4–34·0)               |
| Congo                            | Female        | 129<br>(90·1–182)                       | 0·738<br>(0·558–0·959)             | 4·84<br>(3·39–6·85)               |
| Congo                            | Male          | 1300<br>(1030–1630)                     | 7·11<br>(6·11–8·03)                | 50·0<br>(39·3–62·3)               |
| Democratic Republic of the Congo | Both          | 15700<br>(11900–20300)                  | 2·78<br>(2·28–3·30)                | 17·9<br>(13·6–23·2)               |
| Democratic Republic of the Congo | Female        | 1620<br>(1130–2260)                     | 0·619<br>(0·461–0·818)             | 3·71<br>(2·57–5·16)               |

|                                  |        |                        |                        |                       |
|----------------------------------|--------|------------------------|------------------------|-----------------------|
| Democratic Republic of the Congo | Male   | 14100<br>(10500–18300) | 4.65<br>(3.75–5.58)    | 32.1<br>(24.0–41.6)   |
| Equatorial Guinea                | Both   | 192<br>(137–268)       | 2.52<br>(1.91–3.14)    | 13.5<br>(9.65–18.8)   |
| Equatorial Guinea                | Female | 18.4<br>(11.2–29.3)    | 0.488<br>(0.328–0.702) | 2.83<br>(1.72–4.49)   |
| Equatorial Guinea                | Male   | 173<br>(124–241)       | 4.52<br>(3.50–5.56)    | 22.6<br>(16.2–31.4)   |
| Gabon                            | Both   | 524<br>(410–643)       | 4.45<br>(3.76–5.16)    | 29.9<br>(23.4–36.8)   |
| Gabon                            | Female | 42.6<br>(29.5–60.0)    | 0.816<br>(0.604–1.10)  | 4.71<br>(3.26–6.64)   |
| Gabon                            | Male   | 481<br>(378–587)       | 7.33<br>(6.25–8.44)    | 56.9<br>(44.7–69.4)   |
| Eastern Sub-Saharan Africa       | Both   | 82600<br>(71800–95400) | 3.20<br>(2.86–3.59)    | 20.1<br>(17.4–23.2)   |
| Eastern Sub-Saharan Africa       | Female | 13800<br>(11500–16400) | 1.19<br>(0.994–1.39)   | 6.64<br>(5.53–7.93)   |
| Eastern Sub-Saharan Africa       | Male   | 68900<br>(59400–79900) | 4.83<br>(4.28–5.44)    | 33.7<br>(29.1–39.1)   |
| Burundi                          | Both   | 2780<br>(2080–3630)    | 3.33<br>(2.78–3.93)    | 23.3<br>(17.4–30.4)   |
| Burundi                          | Female | 345<br>(235–496)       | 0.958<br>(0.723–1.25)  | 5.75<br>(3.91–8.27)   |
| Burundi                          | Male   | 2430<br>(1810–3170)    | 5.12<br>(4.26–6.02)    | 41.0<br>(30.6–53.5)   |
| Comoros                          | Both   | 250<br>(195–317)       | 4.99<br>(4.08–5.86)    | 35.0<br>(27.3–44.4)   |
| Comoros                          | Female | 32.5<br>(22.1–45.0)    | 1.31<br>(0.934–1.74)   | 9.08<br>(6.19–12.6)   |
| Comoros                          | Male   | 217<br>(170–275)       | 8.62<br>(7.08–10.1)    | 61.0<br>(47.5–77.1)   |
| Djibouti                         | Both   | 491<br>(363–665)       | 6.48<br>(5.45–7.55)    | 40.8<br>(30.1–55.3)   |
| Djibouti                         | Female | 43.5<br>(29.6–63.0)    | 1.36<br>(1.00–1.79)    | 7.71<br>(5.25–11.2)   |
| Djibouti                         | Male   | 448<br>(329–606)       | 10.2<br>(8.65–11.8)    | 70.0<br>(51.5–94.9)   |
| Eritrea                          | Both   | 1470<br>(1030–1940)    | 3.38<br>(2.65–4.10)    | 21.8<br>(15.3–28.9)   |
| Eritrea                          | Female | 44.2<br>(28.6–66.1)    | 0.224<br>(0.157–0.321) | 1.32<br>(0.857–1.98)  |
| Eritrea                          | Male   | 1420<br>(991–1870)     | 6.01<br>(4.69–7.27)    | 42.1<br>(29.4–55.4)   |
| Ethiopia                         | Both   | 8120<br>(6560–9920)    | 1.45<br>(1.19–1.77)    | 7.55<br>(6.10–9.22)   |
| Ethiopia                         | Female | 486<br>(342–663)       | 0.201<br>(0.146–0.269) | 0.912<br>(0.642–1.24) |
| Ethiopia                         | Male   | 7640<br>(6050–9450)    | 2.40<br>(2.00–2.89)    | 14.1<br>(11.1–17.4)   |
| Kenya                            | Both   | 10200<br>(8350–12300)  | 3.49<br>(2.95–4.08)    | 20.4<br>(16.6–24.4)   |
| Kenya                            | Female | 1230<br>(936–1620)     | 0.929<br>(0.726–1.16)  | 4.91<br>(3.72–6.44)   |

|                             |        |                        |                        |                     |
|-----------------------------|--------|------------------------|------------------------|---------------------|
| Kenya                       | Male   | 9010<br>(7170–11000)   | 5.59<br>(4.76–6.44)    | 36.0<br>(28.6–44.0) |
| Madagascar                  | Both   | 5410<br>(4020–7070)    | 3.29<br>(2.77–3.83)    | 20.3<br>(15.1–26.5) |
| Madagascar                  | Female | 569<br>(387–806)       | 0.732<br>(0.546–0.949) | 4.27<br>(2.90–6.04) |
| Madagascar                  | Male   | 4840<br>(3580–6360)    | 5.58<br>(4.70–6.52)    | 36.3<br>(26.8–47.6) |
| Malawi                      | Both   | 4750<br>(3730–5930)    | 4.07<br>(3.37–4.77)    | 25.7<br>(20.2–32.1) |
| Malawi                      | Female | 560<br>(400–772)       | 1.07<br>(0.795–1.43)   | 5.92<br>(4.23–8.15) |
| Malawi                      | Male   | 4190<br>(3310–5210)    | 6.50<br>(5.36–7.57)    | 46.7<br>(36.9–58.1) |
| Mozambique                  | Both   | 8060<br>(6190–10300)   | 3.04<br>(2.48–3.66)    | 27.3<br>(21.0–35.0) |
| Mozambique                  | Female | 1070<br>(736–1520)     | 0.901<br>(0.640–1.20)  | 6.99<br>(4.80–9.94) |
| Mozambique                  | Male   | 6990<br>(5410–8870)    | 4.78<br>(3.89–5.76)    | 49.2<br>(38.1–62.4) |
| Rwanda                      | Both   | 4960<br>(4020–6020)    | 7.24<br>(6.07–8.41)    | 39.1<br>(31.6–47.5) |
| Rwanda                      | Female | 1920<br>(1510–2380)    | 5.76<br>(4.61–6.98)    | 29.4<br>(23.2–36.6) |
| Rwanda                      | Male   | 3040<br>(2450–3760)    | 8.64<br>(7.22–10.2)    | 49.3<br>(39.7–61.0) |
| Somalia                     | Both   | 5260<br>(3770–7060)    | 2.85<br>(2.28–3.48)    | 25.8<br>(18.5–34.7) |
| Somalia                     | Female | 643<br>(402–971)       | 0.767<br>(0.515–1.08)  | 6.45<br>(4.03–9.75) |
| Somalia                     | Male   | 4610<br>(3310–6180)    | 4.59<br>(3.70–5.62)    | 44.5<br>(31.9–59.5) |
| South Sudan                 | Both   | 1920<br>(1370–2580)    | 2.64<br>(2.06–3.28)    | 20.7<br>(14.8–27.8) |
| South Sudan                 | Female | 177<br>(116–260)       | 0.560<br>(0.381–0.785) | 3.83<br>(2.50–5.62) |
| South Sudan                 | Male   | 1740<br>(1250–2340)    | 4.23<br>(3.29–5.28)    | 37.4<br>(26.8–50.2) |
| Uganda                      | Both   | 6270<br>(4990–7720)    | 2.58<br>(2.16–3.09)    | 15.3<br>(12.1–18.8) |
| Uganda                      | Female | 1330<br>(1010–1720)    | 1.25<br>(0.955–1.61)   | 6.38<br>(4.81–8.23) |
| Uganda                      | Male   | 4940<br>(3920–6080)    | 3.64<br>(3.01–4.35)    | 24.4<br>(19.4–30.1) |
| United Republic of Tanzania | Both   | 17900<br>(14700–21600) | 5.06<br>(4.35–5.73)    | 31.6<br>(26.0–38.1) |
| United Republic of Tanzania | Female | 4310<br>(3400–5320)    | 2.60<br>(2.10–3.11)    | 14.8<br>(11.6–18.2) |
| United Republic of Tanzania | Male   | 13600<br>(11100–16400) | 7.21<br>(6.17–8.23)    | 49.3<br>(40.1–59.6) |
| Zambia                      | Both   | 4670<br>(3600–5810)    | 3.79<br>(3.14–4.46)    | 25.6<br>(19.7–31.8) |
| Zambia                      | Female | 1000<br>(749–1340)     | 1.88<br>(1.42–2.37)    | 10.9<br>(8.12–14.5) |

|                             |        |                        |                        |                     |
|-----------------------------|--------|------------------------|------------------------|---------------------|
| Zambia                      | Male   | 3670<br>(2820–4560)    | 5.23<br>(4.33–6.14)    | 40.7<br>(31.3–50.6) |
| Southern Sub-Saharan Africa | Both   | 47000<br>(42700–51300) | 6.42<br>(5.91–6.92)    | 59.8<br>(54.3–65.3) |
| Southern Sub-Saharan Africa | Female | 10900<br>(9640–12300)  | 3.19<br>(2.84–3.58)    | 27.2<br>(24.0–30.7) |
| Southern Sub-Saharan Africa | Male   | 36100<br>(32700–39500) | 9.25<br>(8.45–10.1)    | 94.0<br>(85.3–103)  |
| Botswana                    | Both   | 1590<br>(1200–1990)    | 7.49<br>(6.54–8.41)    | 67.9<br>(51.4–85.2) |
| Botswana                    | Female | 335<br>(238–467)       | 3.51<br>(2.78–4.31)    | 28.2<br>(20.1–39.3) |
| Botswana                    | Male   | 1250<br>(954–1550)     | 10.8<br>(9.26–12.3)    | 109<br>(82.9–135)   |
| Eswatini                    | Both   | 362<br>(279–473)       | 3.12<br>(2.68–3.60)    | 31.7<br>(24.4–41.4) |
| Eswatini                    | Female | 84.2<br>(51.1–125)     | 1.71<br>(1.23–2.27)    | 14.4<br>(8.75–21.3) |
| Eswatini                    | Male   | 278<br>(217–352)       | 4.16<br>(3.47–4.85)    | 49.7<br>(39.0–63.1) |
| Lesotho                     | Both   | 2220<br>(1740–2750)    | 6.81<br>(5.89–7.74)    | 106<br>(83.1–131)   |
| Lesotho                     | Female | 267<br>(171–396)       | 1.81<br>(1.31–2.49)    | 25.3<br>(16.1–37.4) |
| Lesotho                     | Male   | 1950<br>(1550–2410)    | 11.0<br>(9.43–12.6)    | 189<br>(150–233)    |
| Namibia                     | Both   | 1150<br>(933–1420)     | 6.08<br>(5.46–6.78)    | 47.8<br>(38.8–59.0) |
| Namibia                     | Female | 415<br>(308–546)       | 4.94<br>(4.11–5.84)    | 33.5<br>(24.9–44.0) |
| Namibia                     | Male   | 735<br>(601–886)       | 7.00<br>(6.17–7.93)    | 63.2<br>(51.6–76.2) |
| South Africa                | Both   | 32800<br>(29900–35800) | 6.29<br>(5.76–6.83)    | 59.1<br>(53.8–64.5) |
| South Africa                | Female | 8260<br>(7180–9390)    | 3.36<br>(2.94–3.82)    | 29.1<br>(25.3–33.1) |
| South Africa                | Male   | 24600<br>(22000–27000) | 8.90<br>(8.00–9.75)    | 90.3<br>(80.9–99.0) |
| Zimbabwe                    | Both   | 8840<br>(7010–10700)   | 6.98<br>(6.04–8.00)    | 58.9<br>(46.7–71.2) |
| Zimbabwe                    | Female | 1570<br>(1130–2120)    | 2.65<br>(2.08–3.35)    | 20.2<br>(14.5–27.2) |
| Zimbabwe                    | Male   | 7260<br>(5860–8680)    | 10.8<br>(9.32–12.4)    | 101<br>(81.3–120)   |
| Western Sub-Saharan Africa  | Both   | 62600<br>(52400–74100) | 1.81<br>(1.54–2.08)    | 13.7<br>(11.5–16.2) |
| Western Sub-Saharan Africa  | Female | 7910<br>(6310–9840)    | 0.496<br>(0.405–0.593) | 3.39<br>(2.70–4.22) |
| Western Sub-Saharan Africa  | Male   | 54700<br>(45800–65000) | 2.94<br>(2.50–3.36)    | 24.5<br>(20.5–29.2) |
| Benin                       | Both   | 1940<br>(1480–2520)    | 2.08<br>(1.75–2.41)    | 15.3<br>(11.7–19.9) |
| Benin                       | Female | 255<br>(174–350)       | 0.600<br>(0.442–0.793) | 3.96<br>(2.70–5.43) |



|               |        |                     |                        |                     |
|---------------|--------|---------------------|------------------------|---------------------|
| Benin         | Male   | 1680<br>(1280–2160) | 3.33<br>(2.78–3.84)    | 27.0<br>(20.6–34.8) |
| Burkina Faso  | Both   | 2990<br>(2330–3800) | 1.48<br>(1.18–1.81)    | 13.2<br>(10.3–16.7) |
| Burkina Faso  | Female | 194<br>(133–270)    | 0.209<br>(0.146–0.283) | 1.67<br>(1.14–2.31) |
| Burkina Faso  | Male   | 2800<br>(2180–3540) | 2.58<br>(2.04–3.14)    | 25.3<br>(19.8–32.1) |
| Cabo Verde    | Both   | 157<br>(136–180)    | 4.48<br>(4.04–4.91)    | 27.8<br>(24.1–31.9) |
| Cabo Verde    | Female | 25.5<br>(20.1–31.8) | 1.67<br>(1.34–2.05)    | 9.13<br>(7.17–11.4) |
| Cabo Verde    | Male   | 131<br>(113–149)    | 6.64<br>(5.99–7.30)    | 46.3<br>(39.7–52.6) |
| Cameroon      | Both   | 5410<br>(4150–7150) | 2.61<br>(2.18–3.04)    | 18.6<br>(14.3–24.6) |
| Cameroon      | Female | 357<br>(246–507)    | 0.376<br>(0.272–0.497) | 2.44<br>(1.68–3.47) |
| Cameroon      | Male   | 5060<br>(3860–6630) | 4.49<br>(3.72–5.28)    | 34.9<br>(26.6–45.7) |
| Chad          | Both   | 2970<br>(2260–3840) | 1.90<br>(1.50–2.35)    | 18.1<br>(13.8–23.4) |
| Chad          | Female | 351<br>(243–492)    | 0.500<br>(0.347–0.689) | 4.25<br>(2.94–5.96) |
| Chad          | Male   | 2620<br>(2010–3370) | 3.04<br>(2.39–3.78)    | 32.2<br>(24.7–41.4) |
| Côte d'Ivoire | Both   | 6480<br>(4930–8290) | 3.55<br>(2.87–4.19)    | 24.8<br>(18.8–31.7) |
| Côte d'Ivoire | Female | 894<br>(630–1220)   | 1.16<br>(0.831–1.54)   | 7.06<br>(4.98–9.66) |
| Côte d'Ivoire | Male   | 5590<br>(4230–7140) | 5.29<br>(4.27–6.26)    | 41.4<br>(31.3–52.9) |
| Gambia        | Both   | 611<br>(472–756)    | 4.52<br>(3.67–5.24)    | 27.2<br>(21.0–33.7) |
| Gambia        | Female | 33.3<br>(23.0–46.7) | 0.538<br>(0.400–0.737) | 2.92<br>(2.02–4.09) |
| Gambia        | Male   | 578<br>(444–716)    | 7.90<br>(6.41–9.12)    | 52.3<br>(40.2–64.8) |
| Ghana         | Both   | 5480<br>(4370–6770) | 2.63<br>(2.20–3.06)    | 17.4<br>(13.8–21.5) |
| Ghana         | Female | 816<br>(615–1080)   | 0.848<br>(0.650–1.07)  | 5.03<br>(3.79–6.68) |
| Ghana         | Male   | 4660<br>(3670–5750) | 4.16<br>(3.44–4.89)    | 30.4<br>(24.0–37.6) |
| Guinea        | Both   | 4250<br>(3310–5300) | 3.72<br>(3.23–4.20)    | 33.6<br>(26.2–41.9) |
| Guinea        | Female | 382<br>(260–536)    | 0.720<br>(0.524–0.965) | 5.86<br>(3.99–8.23) |
| Guinea        | Male   | 3870<br>(3010–4870) | 6.33<br>(5.49–7.14)    | 63.1<br>(49.1–79.4) |
| Guinea-Bissau | Both   | 301<br>(236–377)    | 2.03<br>(1.77–2.32)    | 15.9<br>(12.4–19.8) |
| Guinea-Bissau | Female | 31.0<br>(21.6–43.8) | 0.465<br>(0.345–0.612) | 3.18<br>(2.21–4.48) |

|                       |        |                        |                        |                     |
|-----------------------|--------|------------------------|------------------------|---------------------|
| Guinea-Bissau         | Male   | 270<br>(213–337)       | 3.32<br>(2.83–3.80)    | 29.2<br>(23.0–36.4) |
| Liberia               | Both   | 675<br>(506–895)       | 2.27<br>(1.77–2.78)    | 14.1<br>(10.6–18.7) |
| Liberia               | Female | 98.5<br>(67.6–137)     | 0.705<br>(0.513–0.923) | 4.14<br>(2.84–5.74) |
| Liberia               | Male   | 577<br>(429–764)       | 3.65<br>(2.85–4.51)    | 23.9<br>(17.8–31.7) |
| Mali                  | Both   | 3600<br>(2800–4580)    | 1.79<br>(1.54–2.06)    | 16.4<br>(12.8–20.9) |
| Mali                  | Female | 421<br>(298–579)       | 0.449<br>(0.331–0.586) | 3.81<br>(2.70–5.25) |
| Mali                  | Male   | 3180<br>(2470–4080)    | 2.96<br>(2.52–3.44)    | 29.2<br>(22.7–37.5) |
| Mauritania            | Both   | 703<br>(514–898)       | 3.35<br>(2.57–3.96)    | 17.5<br>(12.8–22.4) |
| Mauritania            | Female | 131<br>(87.6–181)      | 1.28<br>(0.912–1.68)   | 6.43<br>(4.29–8.86) |
| Mauritania            | Male   | 572<br>(419–732)       | 5.33<br>(4.08–6.32)    | 29.0<br>(21.2–37.1) |
| Niger                 | Both   | 1980<br>(1470–2570)    | 0.978<br>(0.789–1.15)  | 8.51<br>(6.32–11.0) |
| Niger                 | Female | 203<br>(139–296)       | 0.214<br>(0.153–0.290) | 1.73<br>(1.18–2.52) |
| Niger                 | Male   | 1780<br>(1320–2310)    | 1.65<br>(1.33–1.94)    | 15.4<br>(11.4–20.0) |
| Nigeria               | Both   | 17400<br>(13000–23200) | 1.09<br>(0.822–1.41)   | 8.08<br>(6.05–10.8) |
| Nigeria               | Female | 2720<br>(1830–4070)    | 0.364<br>(0.253–0.502) | 2.44<br>(1.64–3.65) |
| Nigeria               | Male   | 14600<br>(10500–20400) | 1.72<br>(1.31–2.22)    | 14.2<br>(10.2–19.8) |
| São Tomé and Príncipe | Both   | 43.6<br>(35.5–51.6)    | 4.32<br>(3.82–4.87)    | 21.2<br>(17.3–25.1) |
| São Tomé and Príncipe | Female | 6.29<br>(4.59–8.34)    | 1.34<br>(1.02–1.70)    | 6.15<br>(4.48–8.15) |
| São Tomé and Príncipe | Male   | 37.3<br>(30.3–44.5)    | 6.92<br>(6.07–7.82)    | 36.2<br>(29.4–43.2) |
| Senegal               | Both   | 3110<br>(2400–3930)    | 3.46<br>(2.77–4.08)    | 20.5<br>(15.9–26.0) |
| Senegal               | Female | 219<br>(143–314)       | 0.524<br>(0.357–0.727) | 2.90<br>(1.89–4.17) |
| Senegal               | Male   | 2890<br>(2220–3660)    | 5.99<br>(4.79–7.08)    | 38.1<br>(29.3–48.2) |
| Sierra Leone          | Both   | 2220<br>(1680–2910)    | 3.17<br>(2.62–3.69)    | 26.9<br>(20.3–35.2) |
| Sierra Leone          | Female | 375<br>(268–520)       | 1.14<br>(0.863–1.45)   | 8.96<br>(6.41–12.4) |
| Sierra Leone          | Male   | 1850<br>(1390–2410)    | 4.97<br>(4.08–5.83)    | 45.1<br>(34.0–58.8) |
| Togo                  | Both   | 2290<br>(1790–2930)    | 4.28<br>(3.60–5.00)    | 28.9<br>(22.5–37.0) |
| Togo                  | Female | 403<br>(290–546)       | 1.63<br>(1.20–2.11)    | 9.98<br>(7.18–13.5) |

|      |      |                     |                     |                     |
|------|------|---------------------|---------------------|---------------------|
| Togo | Male | 1890<br>(1460-2430) | 6.55<br>(5.45-7.64) | 48.7<br>(37.5-62.6) |
|------|------|---------------------|---------------------|---------------------|

**Supplemental Table S6.** All-cause and all-age smoking attributable disability-adjusted life-years (DALYs) by location and sex, 2019. Estimates are reported as total number of attributable DALYs, percent of DALYs attributable to smoking, and smoking attributable DALY rate (per 100,000).

| Location                                                | Sex           | Number                                    | Percent                    | Rate                       |
|---------------------------------------------------------|---------------|-------------------------------------------|----------------------------|----------------------------|
| <b>Global</b>                                           | <b>Both</b>   | <b>20000000</b><br>(185000000–214000000)  | <b>7.89</b><br>(7.19–8.56) | <b>2580</b><br>(2400–2760) |
| <b>Global</b>                                           | <b>Female</b> | <b>37900000</b><br>(34900000–41000000)    | <b>3.19</b><br>(2.88–3.48) | <b>983</b><br>(904–1060)   |
| <b>Global</b>                                           | <b>Male</b>   | <b>162000000</b><br>(149000000–175000000) | <b>12.0</b><br>(11.1–13.0) | <b>4170</b><br>(3830–4510) |
| <b>Central Europe, Eastern Europe, and Central Asia</b> | <b>Both</b>   | <b>21700000</b><br>(19900000–23600000)    | <b>13.8</b><br>(12.7–14.8) | <b>5190</b><br>(4770–5660) |
| <b>Central Europe, Eastern Europe, and Central Asia</b> | <b>Female</b> | <b>4430000</b><br>(3980000–4940000)       | <b>6.14</b><br>(5.55–6.68) | <b>2030</b><br>(1830–2260) |
| <b>Central Europe, Eastern Europe, and Central Asia</b> | <b>Male</b>   | <b>17300000</b><br>(15700000–18900000)    | <b>20.2</b><br>(19.0–21.3) | <b>8650</b><br>(7870–9470) |
| Central Asia                                            | Both          | 2560000<br>(2340000–2810000)              | 8.99<br>(8.27–9.65)        | 2730<br>(2500–3000)        |
| Central Asia                                            | Female        | 240000<br>(210000–271000)                 | 1.87<br>(1.63–2.11)        | 508<br>(446–575)           |
| Central Asia                                            | Male          | 2320000<br>(2110000–2550000)              | 14.9<br>(13.9–15.7)        | 5000<br>(4550–5500)        |
| Armenia                                                 | Both          | 128000<br>(109000–147000)                 | 13.9<br>(12.5–15.2)        | 4240<br>(3610–4880)        |
| Armenia                                                 | Female        | 7310<br>(5780–9180)                       | 1.67<br>(1.36–2.05)        | 468<br>(370–587)           |
| Armenia                                                 | Male          | 121000<br>(103000–139000)                 | 24.9<br>(22.7–26.8)        | 8280<br>(7050–9560)        |
| Azerbaijan                                              | Both          | 369000<br>(307000–444000)                 | 11.7<br>(10.3–13.2)        | 3590<br>(2990–4320)        |
| Azerbaijan                                              | Female        | 15200<br>(11200–20000)                    | 1.06<br>(0.797–1.37)       | 296<br>(218–390)           |
| Azerbaijan                                              | Male          | 354000<br>(292000–430000)                 | 20.6<br>(18.8–22.3)        | 6880<br>(5680–8360)        |
| Georgia                                                 | Both          | 196000<br>(169000–226000)                 | 13.5<br>(12.3–14.7)        | 5350<br>(4610–6160)        |
| Georgia                                                 | Female        | 19900<br>(16500–24100)                    | 3.05<br>(2.59–3.56)        | 1040<br>(864–1260)         |
| Georgia                                                 | Male          | 176000<br>(152000–203000)                 | 22.2<br>(20.6–23.8)        | 10000<br>(8640–11500)      |
| Kazakhstan                                              | Both          | 603000<br>(528000–688000)                 | 10.4<br>(9.35–11.6)        | 3280<br>(2870–3740)        |
| Kazakhstan                                              | Female        | 71200<br>(59400–84900)                    | 2.76<br>(2.32–3.25)        | 750<br>(627–895)           |
| Kazakhstan                                              | Male          | 532000<br>(462000–609000)                 | 16.7<br>(15.2–18.2)        | 5970<br>(5190–6840)        |
| Kyrgyzstan                                              | Both          | 151000<br>(132000–171000)                 | 9.13<br>(8.09–10.1)        | 2300<br>(2020–2620)        |

|                        |        |                              |                      |                       |
|------------------------|--------|------------------------------|----------------------|-----------------------|
| Kyrgyzstan             | Female | 18100<br>(14900–21700)       | 2.45<br>(1.99–2.96)  | 548<br>(453–658)      |
| Kyrgyzstan             | Male   | 133000<br>(117000–150000)    | 14.6<br>(13.2–15.8)  | 4100<br>(3620–4630)   |
| Mongolia               | Both   | 117000<br>(92800–150000)     | 10.0<br>(8.90–11.1)  | 3470<br>(2740–4440)   |
| Mongolia               | Female | 13900<br>(10700–18000)       | 2.91<br>(2.38–3.43)  | 810<br>(625–1050)     |
| Mongolia               | Male   | 104000<br>(81800–132000)     | 14.9<br>(13.5–16.4)  | 6190<br>(4900–7920)   |
| Tajikistan             | Both   | 143000<br>(116000–177000)    | 5.33<br>(4.62–6.08)  | 1510<br>(1230–1860)   |
| Tajikistan             | Female | 15000<br>(11300–19900)       | 1.24<br>(0.933–1.62) | 320<br>(240–423)      |
| Tajikistan             | Male   | 128000<br>(104000–158000)    | 8.71<br>(7.59–9.90)  | 2670<br>(2170–3300)   |
| Turkmenistan           | Both   | 134000<br>(107000–165000)    | 8.44<br>(7.51–9.32)  | 2640<br>(2110–3240)   |
| Turkmenistan           | Female | 18100<br>(13400–23700)       | 2.61<br>(2.05–3.25)  | 727<br>(540–951)      |
| Turkmenistan           | Male   | 116000<br>(93400–142000)     | 12.9<br>(11.6–14.2)  | 4470<br>(3600–5480)   |
| Uzbekistan             | Both   | 715000<br>(604000–838000)    | 7.11<br>(6.36–7.84)  | 2120<br>(1790–2490)   |
| Uzbekistan             | Female | 61000<br>(46700–78900)       | 1.32<br>(1.03–1.69)  | 362<br>(277–468)      |
| Uzbekistan             | Male   | 655000<br>(551000–768000)    | 12.0<br>(11.0–13.1)  | 3890<br>(3280–4570)   |
| Central Europe         | Both   | 6600000<br>(5840000–7450000) | 16.3<br>(14.9–17.6)  | 5780<br>(5110–6520)   |
| Central Europe         | Female | 2030000<br>(1790000–2310000) | 10.8<br>(9.78–11.8)  | 3470<br>(3050–3950)   |
| Central Europe         | Male   | 4570000<br>(3990000–5160000) | 21.0<br>(19.4–22.5)  | 8220<br>(7170–9270)   |
| Albania                | Both   | 104000<br>(81300–130000)     | 13.6<br>(11.7–15.3)  | 3830<br>(2990–4790)   |
| Albania                | Female | 18400<br>(14400–23400)       | 5.35<br>(4.34–6.44)  | 1350<br>(1060–1730)   |
| Albania                | Male   | 85800<br>(66600–109000)      | 20.3<br>(18.0–22.6)  | 6300<br>(4890–7970)   |
| Bosnia and Herzegovina | Both   | 225000<br>(183000–274000)    | 19.5<br>(17.6–21.5)  | 6810<br>(5560–8290)   |
| Bosnia and Herzegovina | Female | 73600<br>(60000–88800)       | 13.4<br>(11.7–15.0)  | 4360<br>(3550–5250)   |
| Bosnia and Herzegovina | Male   | 151000<br>(123000–184000)    | 25.2<br>(22.8–27.4)  | 9390<br>(7630–11400)  |
| Bulgaria               | Both   | 572000<br>(463000–703000)    | 17.6<br>(16.1–18.9)  | 8250<br>(6670–10100)  |
| Bulgaria               | Female | 159000<br>(128000–194000)    | 10.7<br>(9.50–11.8)  | 4460<br>(3600–5450)   |
| Bulgaria               | Male   | 413000<br>(334000–506000)    | 23.4<br>(21.7–25.0)  | 12300<br>(9930–15000) |
| Croatia                | Both   | 239000<br>(197000–290000)    | 16.2<br>(14.6–17.8)  | 5620<br>(4630–6830)   |

|                 |        |                            |                     |                      |
|-----------------|--------|----------------------------|---------------------|----------------------|
| Croatia         | Female | 76800<br>(63500–92700)     | 10·9<br>(9·64–12·1) | 3510<br>(2900–4230)  |
| Croatia         | Male   | 162000<br>(132000–198000)  | 21·1<br>(19·1–23·0) | 7870<br>(6430–9610)  |
| Czechia         | Both   | 529000<br>(444000–628000)  | 15·3<br>(13·7–16·8) | 4970<br>(4170–5900)  |
| Czechia         | Female | 171000<br>(144000–201000)  | 10·5<br>(9·29–11·7) | 3160<br>(2660–3710)  |
| Czechia         | Male   | 358000<br>(299000–423000)  | 19·6<br>(17·7–21·3) | 6830<br>(5700–8080)  |
| Hungary         | Both   | 672000<br>(566000–798000)  | 18·1<br>(16·5–19·8) | 6950<br>(5850–8250)  |
| Hungary         | Female | 240000<br>(202000–282000)  | 13·4<br>(12·0–14·8) | 4740<br>(3980–5570)  |
| Hungary         | Male   | 432000<br>(362000–513000)  | 22·6<br>(20·8–24·4) | 9370<br>(7860–11100) |
| Montenegro      | Both   | 46000<br>(39500–53800)     | 22·0<br>(20·0–24·1) | 7420<br>(6360–8680)  |
| Montenegro      | Female | 16300<br>(14100–18600)     | 16·9<br>(14·8–18·9) | 5180<br>(4500–5940)  |
| Montenegro      | Male   | 29800<br>(25000–35300)     | 26·4<br>(24·0–28·7) | 9720<br>(8140–11500) |
| North Macedonia | Both   | 144000<br>(117000–175000)  | 19·2<br>(17·2–21·1) | 6680<br>(5430–8150)  |
| North Macedonia | Female | 44600<br>(36100–54800)     | 12·9<br>(11·3–14·5) | 4210<br>(3400–5170)  |
| North Macedonia | Male   | 99200<br>(79900–122000)    | 24·6<br>(22·3–26·7) | 9080<br>(7310–11200) |
| Poland          | Both   | 206000<br>(174000–243000)  | 16·3<br>(14·8–17·9) | 5370<br>(4530–6320)  |
| Poland          | Female | 671000<br>(551000–812000)  | 11·7<br>(10·3–13·0) | 3380<br>(2780–4100)  |
| Poland          | Male   | 139000<br>(112000–170000)  | 20·1<br>(18·3–21·9) | 7480<br>(6010–9130)  |
| Romania         | Both   | 108000<br>(902000–1270000) | 14·5<br>(13·2–15·6) | 5610<br>(4690–6620)  |
| Romania         | Female | 260000<br>(214000–307000)  | 7·65<br>(6·79–8·53) | 2640<br>(2170–3110)  |
| Romania         | Male   | 818000<br>(684000–976000)  | 20·2<br>(18·7–21·6) | 8740<br>(7310–10400) |
| Serbia          | Both   | 625000<br>(513000–756000)  | 19·1<br>(17·3–20·7) | 7140<br>(5860–8640)  |
| Serbia          | Female | 219000<br>(181000–267000)  | 14·0<br>(12·5–15·5) | 4960<br>(4100–6040)  |
| Serbia          | Male   | 406000<br>(331000–493000)  | 23·6<br>(21·5–25·6) | 9360<br>(7630–11400) |
| Slovakia        | Both   | 228000<br>(184000–279000)  | 12·9<br>(11·5–14·3) | 4190<br>(3390–5130)  |
| Slovakia        | Female | 57500<br>(46400–70400)     | 7·02<br>(6·10–7·91) | 2070<br>(1670–2530)  |
| Slovakia        | Male   | 170000<br>(137000–208000)  | 18·1<br>(16·2–19·9) | 6410<br>(5180–7830)  |
| Slovenia        | Both   | 80300<br>(64600–99100)     | 12·8<br>(11·4–14·3) | 3870<br>(3120–4780)  |

|                     |             |                                            |                                   |                                   |
|---------------------|-------------|--------------------------------------------|-----------------------------------|-----------------------------------|
| Slovenia            | Female      | 25100<br>(20200–30700)                     | 8.58<br>(7.57–9.63)               | 2410<br>(1930–2940)               |
| Slovenia            | Male        | 55100<br>(44200–68600)                     | 16.6<br>(14.7–18.3)               | 5360<br>(4300–6670)               |
| Eastern Europe      | Both        | 1250000<br>(1110000–1400000)               | 14.1<br>(12.9–15.3)               | 5970<br>(5300–6670)               |
| Eastern Europe      | Female      | 216000<br>(187000–249000)                  | 5.32<br>(4.77–5.83)               | 1920<br>(1660–2220)               |
| Eastern Europe      | Male        | 1040000<br>(903000–1180000)                | 21.5<br>(20.2–22.7)               | 10600<br>(9250–12100)             |
| Belarus             | Both        | 563000<br>(452000–695000)                  | 15.1<br>(13.5–16.4)               | 5930<br>(4760–7320)               |
| Belarus             | Female      | 90400<br>(71300–114000)                    | 5.26<br>(4.49–6.07)               | 1780<br>(1410–2250)               |
| Belarus             | Male        | 473000<br>(379000–583000)                  | 23.4<br>(21.5–24.9)               | 10700<br>(8560–13200)             |
| Estonia             | Both        | 55700<br>(44800–68300)                     | 12.2<br>(10.9–13.6)               | 4240<br>(3410–5210)               |
| Estonia             | Female      | 16200<br>(13300–19700)                     | 7.20<br>(6.35–8.26)               | 2340<br>(1910–2840)               |
| Estonia             | Male        | 39400<br>(31500–48500)                     | 17.1<br>(15.5–18.9)               | 6380<br>(5090–7840)               |
| Latvia              | Both        | 96700<br>(81000–116000)                    | 12.6<br>(11.2–13.9)               | 5050<br>(4230–6030)               |
| Latvia              | Female      | 22800<br>(18100–28600)                     | 5.94<br>(5.20–6.76)               | 2210<br>(1750–2770)               |
| Latvia              | Male        | 74000<br>(59500–91300)                     | 19.2<br>(17.6–20.8)               | 8380<br>(6740–10300)              |
| Lithuania           | Both        | 128000<br>(107000–153000)                  | 11.7<br>(10.5–12.8)               | 4590<br>(3820–5490)               |
| Lithuania           | Female      | 25000<br>(20700–30000)                     | 4.71<br>(4.11–5.35)               | 1660<br>(1370–1990)               |
| Lithuania           | Male        | 103000<br>(86100–124000)                   | 18.3<br>(16.7–19.7)               | 8020<br>(6680–9610)               |
| Republic of Moldova | Both        | 171000<br>(149000–194000)                  | 12.5<br>(11.3–13.7)               | 4620<br>(4030–5250)               |
| Republic of Moldova | Female      | 19900<br>(15800–24500)                     | 3.14<br>(2.53–3.84)               | 1030<br>(820–1270)                |
| Republic of Moldova | Male        | 151000<br>(132000–170000)                  | 20.6<br>(19.0–22.2)               | 8560<br>(7500–9650)               |
| Russian Federation  | Both        | 833000<br>(715000–967000)                  | 13.9<br>(12.6–15.4)               | 5680<br>(4870–6590)               |
| Russian Federation  | Female      | 152000<br>(128000–180000)                  | 5.51<br>(4.90–6.06)               | 1940<br>(1630–2300)               |
| Russian Federation  | Male        | 681000<br>(570000–807000)                  | 21.1<br>(19.7–22.6)               | 9970<br>(8350–11800)              |
| Ukraine             | Both        | 318000<br>(265000–375000)                  | 14.7<br>(13.1–16.3)               | 7220<br>(6030–8520)               |
| Ukraine             | Female      | 459000<br>(364000–572000)                  | 4.87<br>(4.23–5.58)               | 1930<br>(1530–2410)               |
| Ukraine             | Male        | 272000<br>(222000–330000)                  | 22.4<br>(20.8–23.7)               | 13400<br>(10900–16300)            |
| <b>High-income</b>  | <b>Both</b> | <b>3900000</b><br><b>(3650000–4170000)</b> | <b>12.1</b><br><b>(10.9–13.2)</b> | <b>3600</b><br><b>(3370–3850)</b> |

| <b>High-income</b>        | <b>Female</b> | <b>14300000</b><br><b>(13100000–15600000)</b> | <b>8.96</b><br><b>(7.99–9.88)</b> | <b>2590</b><br><b>(2370–2820)</b> |
|---------------------------|---------------|-----------------------------------------------|-----------------------------------|-----------------------------------|
| <b>High-income</b>        | <b>Male</b>   | <b>24800000</b><br><b>(23400000–26300000)</b> | <b>15.1</b><br><b>(13.9–16.3)</b> | <b>4650</b><br><b>(4380–4930)</b> |
| Australasia               | Both          | 629000<br>(580000–684000)                     | 8.41<br>(7.53–9.26)               | 2160<br>(2000–2350)               |
| Australasia               | Female        | 271000<br>(245000–299000)                     | 7.40<br>(6.49–8.29)               | 1840<br>(1660–2030)               |
| Australasia               | Male          | 358000<br>(332000–386000)                     | 9.39<br>(8.42–10.3)               | 2500<br>(2320–2700)               |
| Australia                 | Both          | 513000<br>(471000–560000)                     | 8.18<br>(7.32–9.04)               | 2090<br>(1920–2280)               |
| Australia                 | Female        | 219000<br>(196000–244000)                     | 7.15<br>(6.28–8.04)               | 1760<br>(1580–1960)               |
| Australia                 | Male          | 294000<br>(271000–318000)                     | 9.16<br>(8.23–10.1)               | 2420<br>(2230–2630)               |
| New Zealand               | Both          | 116000<br>(108000–125000)                     | 9.59<br>(8.50–10.6)               | 2590<br>(2390–2790)               |
| New Zealand               | Female        | 52100<br>(47300–57100)                        | 8.62<br>(7.57–9.61)               | 2260<br>(2050–2470)               |
| New Zealand               | Male          | 64200<br>(59600–69100)                        | 10.6<br>(9.45–11.6)               | 2930<br>(2730–3160)               |
| High-income Asia Pacific  | Both          | 5590000<br>(5170000–6050000)                  | 11.2<br>(10.0–12.4)               | 2990<br>(2760–3230)               |
| High-income Asia Pacific  | Female        | 1060000<br>(933000–1220000)                   | 4.39<br>(3.83–5.03)               | 1120<br>(983–1290)                |
| High-income Asia Pacific  | Male          | 4530000<br>(4210000–4870000)                  | 17.6<br>(16.0–19.1)               | 4900<br>(4560–5270)               |
| Brunei Darussalam         | Both          | 8390<br>(7330–9630)                           | 8.58<br>(7.54–9.70)               | 1920<br>(1680–2200)               |
| Brunei Darussalam         | Female        | 1740<br>(1400–2170)                           | 3.85<br>(3.07–4.83)               | 835<br>(674–1040)                 |
| Brunei Darussalam         | Male          | 6650<br>(5700–7720)                           | 12.7<br>(11.4–14.1)               | 2900<br>(2490–3370)               |
| Japan                     | Both          | 4210000<br>(3870000–4590000)                  | 11.6<br>(10.4–12.7)               | 3300<br>(3030–3590)               |
| Japan                     | Female        | 877000<br>(763000–1020000)                    | 4.90<br>(4.26–5.63)               | 1340<br>(1160–1550)               |
| Japan                     | Male          | 3340000<br>(3100000–3590000)                  | 18.0<br>(16.4–19.5)               | 5360<br>(4970–5760)               |
| Republic of Korea         | Both          | 1290000<br>(1180000–1410000)                  | 10.5<br>(9.26–11.7)               | 2420<br>(2210–2640)               |
| Republic of Korea         | Female        | 169000<br>(143000–200000)                     | 2.94<br>(2.43–3.49)               | 641<br>(543–758)                  |
| Republic of Korea         | Male          | 1120000<br>(1030000–1220000)                  | 17.1<br>(15.4–18.7)               | 4160<br>(3800–4520)               |
| Singapore                 | Both          | 79000<br>(71900–86000)                        | 7.58<br>(6.56–8.57)               | 1390<br>(1270–1520)               |
| Singapore                 | Female        | 15100<br>(12700–18000)                        | 3.00<br>(2.45–3.58)               | 545<br>(459–648)                  |
| Singapore                 | Male          | 63900<br>(58300–69700)                        | 11.8<br>(10.4–13.2)               | 2210<br>(2010–2410)               |
| High-income North America | Both          | 15100000<br>(14100000–16200000)               | 12.5<br>(11.4–13.6)               | 4150<br>(3880–4440)               |



|                           |        |                                 |                     |                     |
|---------------------------|--------|---------------------------------|---------------------|---------------------|
| High-income North America | Female | 6560000<br>(6030000–7100000)    | 11·1<br>(9·95–12·3) | 3540<br>(3260–3830) |
| High-income North America | Male   | 8580000<br>(8070000–9090000)    | 13·9<br>(12·7–15·0) | 4780<br>(4500–5070) |
| Canada                    | Both   | 1190000<br>(1100000–1270000)    | 11·9<br>(10·6–13·1) | 3250<br>(3010–3480) |
| Canada                    | Female | 507000<br>(461000–554000)       | 10·3<br>(8·98–11·6) | 2730<br>(2480–2990) |
| Canada                    | Male   | 679000<br>(633000–726000)       | 13·5<br>(12·3–14·7) | 3780<br>(3520–4040) |
| Greenland                 | Both   | 3590<br>(2960–4220)             | 17·8<br>(16·2–19·6) | 6380<br>(5260–7520) |
| Greenland                 | Female | 1410<br>(1180–1680)             | 16·7<br>(14·6–18·9) | 5310<br>(4430–6330) |
| Greenland                 | Male   | 2170<br>(1780–2570)             | 18·6<br>(17·0–20·4) | 7340<br>(6020–8680) |
| United States of America  | Both   | 14000000<br>(13000000–14900000) | 12·6<br>(11·5–13·6) | 4250<br>(3970–4550) |
| United States of America  | Female | 6050000<br>(5560000–6560000)    | 11·2<br>(10·0–12·4) | 3630<br>(3330–3930) |
| United States of America  | Male   | 7900000<br>(7430000–8380000)    | 13·9<br>(12·8–15·0) | 4900<br>(4610–5200) |
| Southern Latin America    | Both   | 1790000<br>(1680000–1910000)    | 9·89<br>(8·93–10·8) | 2690<br>(2520–2860) |
| Southern Latin America    | Female | 697000<br>(633000–763000)       | 7·98<br>(7·10–8·85) | 2040<br>(1850–2230) |
| Southern Latin America    | Male   | 1100000<br>(1030000–1170000)    | 11·7<br>(10·7–12·6) | 3370<br>(3180–3580) |
| Argentina                 | Both   | 1330000<br>(1240000–1410000)    | 10·6<br>(9·52–11·5) | 2940<br>(2760–3130) |
| Argentina                 | Female | 513000<br>(464000–560000)       | 8·53<br>(7·56–9·55) | 2220<br>(2010–2420) |
| Argentina                 | Male   | 815000<br>(766000–863000)       | 12·4<br>(11·4–13·4) | 3700<br>(3480–3920) |
| Chile                     | Both   | 342000<br>(313000–375000)       | 7·58<br>(6·84–8·27) | 1880<br>(1720–2060) |
| Chile                     | Female | 145000<br>(128000–164000)       | 6·57<br>(5·79–7·37) | 1570<br>(1380–1770) |
| Chile                     | Male   | 197000<br>(180000–215000)       | 8·56<br>(7·78–9·28) | 2200<br>(2020–2400) |
| Uruguay                   | Both   | 124000<br>(117000–132000)       | 11·7<br>(10·6–12·7) | 3620<br>(3400–3850) |
| Uruguay                   | Female | 39300<br>(35600–43200)          | 7·63<br>(6·76–8·51) | 2200<br>(1990–2420) |
| Uruguay                   | Male   | 85100<br>(80300–90100)          | 15·6<br>(14·4–16·8) | 5170<br>(4870–5470) |
| Western Europe            | Both   | 15900000<br>(14800000–17000000) | 12·5<br>(11·4–13·7) | 3640<br>(3390–3900) |
| Western Europe            | Female | 5660000<br>(5140000–6230000)    | 8·90<br>(7·97–9·79) | 2550<br>(2320–2810) |
| Western Europe            | Male   | 10200000<br>(9610000–10800000)  | 16·2<br>(14·8–17·5) | 4760<br>(4480–5050) |
| Andorra                   | Both   | 2820<br>(2260–3460)             | 12·9<br>(11·1–14·7) | 3400<br>(2720–4160) |

|         |        |                              |                     |                     |
|---------|--------|------------------------------|---------------------|---------------------|
| Andorra | Female | 770<br>(590–977)             | 7·63<br>(6·26–9·15) | 1900<br>(1460–2420) |
| Andorra | Male   | 2050<br>(1640–2490)          | 17·4<br>(15·2–19·5) | 4820<br>(3850–5850) |
| Austria | Both   | 312000<br>(288000–337000)    | 12·3<br>(11·2–13·5) | 3500<br>(3230–3780) |
| Austria | Female | 114000<br>(103000–127000)    | 9·04<br>(8·06–10·0) | 2520<br>(2270–2800) |
| Austria | Male   | 198000<br>(185000–212000)    | 15·6<br>(14·2–17·0) | 4500<br>(4200–4820) |
| Belgium | Both   | 460000<br>(429000–495000)    | 13·6<br>(12·3–14·9) | 4030<br>(3760–4330) |
| Belgium | Female | 164000<br>(148000–181000)    | 9·69<br>(8·64–10·8) | 2830<br>(2560–3130) |
| Belgium | Male   | 296000<br>(278000–315000)    | 17·5<br>(15·9–19·0) | 5270<br>(4960–5600) |
| Cyprus  | Both   | 41400<br>(37100–46400)       | 12·9<br>(11·6–14·3) | 3150<br>(2830–3530) |
| Cyprus  | Female | 10800<br>(9230–12500)        | 6·84<br>(5·94–7·77) | 1620<br>(1390–1890) |
| Cyprus  | Male   | 30600<br>(27700–34200)       | 18·8<br>(17·1–20·6) | 4720<br>(4260–5270) |
| Denmark | Both   | 276000<br>(257000–297000)    | 16·3<br>(14·7–17·8) | 4760<br>(4430–5120) |
| Denmark | Female | 124000<br>(113000–135000)    | 14·7<br>(13·1–16·4) | 4270<br>(3890–4640) |
| Denmark | Male   | 152000<br>(141000–163000)    | 17·9<br>(16·3–19·4) | 5260<br>(4900–5650) |
| Finland | Both   | 166000<br>(152000–180000)    | 9·93<br>(8·96–10·9) | 2990<br>(2750–3250) |
| Finland | Female | 56200<br>(50300–63200)       | 6·93<br>(6·18–7·73) | 2000<br>(1790–2260) |
| Finland | Male   | 109000<br>(101000–118000)    | 12·8<br>(11·6–13·8) | 4010<br>(3710–4310) |
| France  | Both   | 1980000<br>(1810000–2130000) | 11·0<br>(9·85–12·1) | 2990<br>(2740–3220) |
| France  | Female | 640000<br>(566000–722000)    | 7·07<br>(6·30–7·89) | 1880<br>(1660–2120) |
| France  | Male   | 1340000<br>(1240000–1430000) | 14·9<br>(13·6–16·3) | 4170<br>(3880–4440) |
| Germany | Both   | 3550000<br>(3290000–3830000) | 13·0<br>(11·7–14·2) | 4180<br>(3870–4510) |
| Germany | Female | 1280000<br>(1160000–1420000) | 9·43<br>(8·40–10·4) | 3010<br>(2710–3330) |
| Germany | Male   | 2270000<br>(2120000–2430000) | 16·6<br>(15·1–17·9) | 5370<br>(5030–5750) |
| Greece  | Both   | 595000<br>(557000–637000)    | 17·6<br>(16·0–19·2) | 5750<br>(5390–6160) |
| Greece  | Female | 181000<br>(165000–200000)    | 10·9<br>(9·70–11·9) | 3420<br>(3100–3760) |
| Greece  | Male   | 414000<br>(391000–439000)    | 24·2<br>(22·2–26·1) | 8220<br>(7770–8730) |
| Iceland | Both   | 8550<br>(7660–9540)          | 11·1<br>(9·76–12·4) | 2480<br>(2220–2770) |

|             |        |                              |                     |                     |
|-------------|--------|------------------------------|---------------------|---------------------|
| Iceland     | Female | 3340<br>(2910–3790)          | 9·00<br>(7·73–10·3) | 1950<br>(1710–2220) |
| Iceland     | Male   | 5210<br>(4690–5780)          | 13·0<br>(11·6–14·5) | 2990<br>(2690–3320) |
| Ireland     | Both   | 145000<br>(133000–158000)    | 12·3<br>(11·0–13·6) | 2960<br>(2720–3230) |
| Ireland     | Female | 63300<br>(57100–70400)       | 10·7<br>(9·37–11·9) | 2550<br>(2300–2840) |
| Ireland     | Male   | 82100<br>(75600–88400)       | 14·0<br>(12·5–15·3) | 3380<br>(3110–3640) |
| Israel      | Both   | 158000<br>(144000–173000)    | 8·66<br>(7·66–9·58) | 1700<br>(1550–1860) |
| Israel      | Female | 51700<br>(45500–58600)       | 5·51<br>(4·77–6·22) | 1110<br>(972–1250)  |
| Israel      | Male   | 107000<br>(98100–115000)     | 12·0<br>(10·8–13·1) | 2300<br>(2120–2490) |
| Italy       | Both   | 2060000<br>(1900000–2230000) | 11·4<br>(10·2–12·6) | 3420<br>(3150–3690) |
| Italy       | Female | 672000<br>(598000–751000)    | 7·30<br>(6·51–8·12) | 2170<br>(1930–2420) |
| Italy       | Male   | 1390000<br>(1290000–1480000) | 15·7<br>(14·2–17·2) | 4730<br>(4410–5060) |
| Luxembourg  | Both   | 17600<br>(15500–20000)       | 11·6<br>(10·1–13·0) | 2850<br>(2510–3230) |
| Luxembourg  | Female | 6520<br>(5580–7610)          | 8·55<br>(7·32–9·75) | 2120<br>(1810–2470) |
| Luxembourg  | Male   | 11100<br>(9820–12500)        | 14·7<br>(13·0–16·4) | 3570<br>(3160–4030) |
| Malta       | Both   | 14300<br>(12800–16100)       | 11·7<br>(10·5–12·9) | 3270<br>(2910–3660) |
| Malta       | Female | 4200<br>(3570–4950)          | 6·94<br>(6·03–7·94) | 1910<br>(1630–2250) |
| Malta       | Male   | 10100<br>(9160–11200)        | 16·3<br>(14·9–17·9) | 4620<br>(4180–5130) |
| Monaco      | Both   | 2190<br>(1810–2590)          | 16·0<br>(14·1–18·1) | 5830<br>(4810–6890) |
| Monaco      | Female | 756<br>(589–941)             | 11·2<br>(9·31–13·3) | 3920<br>(3050–4880) |
| Monaco      | Male   | 1430<br>(1200–1660)          | 20·6<br>(18·5–23·1) | 7830<br>(6580–9090) |
| Netherlands | Both   | 715000<br>(666000–765000)    | 14·9<br>(13·4–16·4) | 4170<br>(3880–4460) |
| Netherlands | Female | 303000<br>(277000–330000)    | 12·4<br>(11·0–13·8) | 3510<br>(3210–3820) |
| Netherlands | Male   | 412000<br>(384000–441000)    | 17·6<br>(15·9–19·1) | 4840<br>(4520–5180) |
| Norway      | Both   | 127000<br>(116000–138000)    | 9·29<br>(8·34–10·3) | 2370<br>(2170–2590) |
| Norway      | Female | 50700<br>(44600–57500)       | 7·40<br>(6·40–8·38) | 1910<br>(1680–2170) |
| Norway      | Male   | 75900<br>(70000–82700)       | 11·2<br>(10·0–12·4) | 2810<br>(2590–3060) |
| Portugal    | Both   | 323000<br>(296000–351000)    | 9·71<br>(8·79–10·6) | 3040<br>(2780–3290) |

|                                    |               |                                      |                             |                             |
|------------------------------------|---------------|--------------------------------------|-----------------------------|-----------------------------|
| Portugal                           | Female        | 69500<br>(58700–80500)               | 4·15<br>(3·65–4·66)         | 1240<br>(1050–1440)         |
| Portugal                           | Male          | 254000<br>(236000–273000)            | 15·3<br>(14·0–16·5)         | 5010<br>(4660–5390)         |
| San Marino                         | Both          | 993<br>(702–1350)                    | 10·8<br>(9·02–12·8)         | 3000<br>(2120–4090)         |
| San Marino                         | Female        | 322<br>(231–453)                     | 6·97<br>(5·61–8·63)         | 1870<br>(1350–2640)         |
| San Marino                         | Male          | 672<br>(463–910)                     | 14·8<br>(12·5–17·0)         | 4220<br>(2910–5710)         |
| Spain                              | Both          | 1640000<br>(1510000–1760000)         | 13·0<br>(11·7–14·3)         | 3550<br>(3290–3820)         |
| Spain                              | Female        | 407000<br>(357000–459000)            | 6·40<br>(5·70–7·11)         | 1730<br>(1520–1950)         |
| Spain                              | Male          | 1230000<br>(1150000–1310000)         | 19·6<br>(17·9–21·4)         | 5450<br>(5110–5810)         |
| Sweden                             | Both          | 304000<br>(278000–331000)            | 11·1<br>(9·97–12·2)         | 2970<br>(2720–3240)         |
| Sweden                             | Female        | 150000<br>(135000–165000)            | 10·9<br>(9·61–12·1)         | 2950<br>(2660–3250)         |
| Sweden                             | Male          | 154000<br>(141000–168000)            | 11·3<br>(10·3–12·4)         | 3000<br>(2740–3270)         |
| Switzerland                        | Both          | 249000<br>(226000–273000)            | 11·1<br>(9·92–12·2)         | 2830<br>(2580–3110)         |
| Switzerland                        | Female        | 96800<br>(85600–109000)              | 8·44<br>(7·45–9·49)         | 2200<br>(1940–2480)         |
| Switzerland                        | Male          | 152000<br>(140000–165000)            | 13·9<br>(12·5–15·3)         | 3470<br>(3190–3770)         |
| United Kingdom                     | Both          | 2720000<br>(2540000–2930000)         | 13·8<br>(12·5–15·2)         | 4040<br>(3770–4350)         |
| United Kingdom                     | Female        | 1200000<br>(1100000–1310000)         | 12·2<br>(10·9–13·5)         | 3530<br>(3230–3860)         |
| United Kingdom                     | Male          | 1520000<br>(1420000–1620000)         | 15·5<br>(14·1–16·9)         | 4570<br>(4280–4880)         |
| <b>Latin America and Caribbean</b> | <b>Both</b>   | <b>8560000<br/>(7870000–9330000)</b> | <b>5·16<br/>(4·71–5·57)</b> | <b>1460<br/>(1350–1600)</b> |
| <b>Latin America and Caribbean</b> | <b>Female</b> | <b>2860000<br/>(2590000–3150000)</b> | <b>3·74<br/>(3·32–4·14)</b> | <b>960<br/>(871–1060)</b>   |
| <b>Latin America and Caribbean</b> | <b>Male</b>   | <b>5700000<br/>(5240000–6210000)</b> | <b>6·38<br/>(5·92–6·82)</b> | <b>1990<br/>(1830–2170)</b> |
| Andean Latin America               | Both          | 330000<br>(275000–394000)            | 2·13<br>(1·88–2·37)         | 519<br>(433–620)            |
| Andean Latin America               | Female        | 70900<br>(57300–87700)               | 0·947<br>(0·800–1·12)       | 223<br>(180–276)            |
| Andean Latin America               | Male          | 259000<br>(214000–307000)            | 3·23<br>(2·87–3·55)         | 815<br>(672–966)            |
| Bolivia (Plurinational State of)   | Both          | 89100<br>(70400–110000)              | 2·44<br>(2·08–2·81)         | 741<br>(586–914)            |
| Bolivia (Plurinational State of)   | Female        | 17700<br>(13200–23600)               | 0·975<br>(0·762–1·21)       | 294<br>(220–393)            |
| Bolivia (Plurinational State of)   | Male          | 71400<br>(56000–88200)               | 3·87<br>(3·33–4·43)         | 1190<br>(931–1470)          |
| Ecuador                            | Both          | 122000<br>(97400–153000)             | 2·79<br>(2·40–3·24)         | 694<br>(554–868)            |

|                     |        |                             |                        |                     |
|---------------------|--------|-----------------------------|------------------------|---------------------|
| Ecuador             | Female | 26400<br>(20800–33500)      | 1:30<br>(1:05–1:61)    | 299<br>(235–379)    |
| Ecuador             | Male   | 95700<br>(75800–120000)     | 4:08<br>(3:55–4:68)    | 1090<br>(865–1380)  |
| Peru                | Both   | 119000<br>(90900–155000)    | 1:58<br>(1:33–1:85)    | 350<br>(267–456)    |
| Peru                | Female | 26800<br>(19800–36500)      | 0:734<br>(0:580–0:914) | 158<br>(117–215)    |
| Peru                | Male   | 92100<br>(70300–122000)     | 2:39<br>(2:02–2:76)    | 541<br>(413–714)    |
| Caribbean           | Both   | 1020000<br>(892000–1180000) | 6:16<br>(5:57–6:75)    | 2170<br>(1890–2500) |
| Caribbean           | Female | 320000<br>(276000–372000)   | 4:07<br>(3:57–4:56)    | 1340<br>(1160–1560) |
| Caribbean           | Male   | 704000<br>(613000–807000)   | 8:03<br>(7:36–8:72)    | 3030<br>(2630–3470) |
| Antigua and Barbuda | Both   | 1020<br>(868–1210)          | 4:23<br>(3:71–4:78)    | 1160<br>(981–1360)  |
| Antigua and Barbuda | Female | 318<br>(255–403)            | 2:68<br>(2:16–3:31)    | 704<br>(563–891)    |
| Antigua and Barbuda | Male   | 705<br>(595–831)            | 5:73<br>(5:09–6:44)    | 1630<br>(1380–1920) |
| Bahamas             | Both   | 4650<br>(3740–5740)         | 3:82<br>(3:31–4:37)    | 1230<br>(993–1520)  |
| Bahamas             | Female | 1000<br>(758–1300)          | 1:81<br>(1:44–2:27)    | 514<br>(390–666)    |
| Bahamas             | Male   | 3650<br>(2940–4480)         | 5:49<br>(4:82–6:18)    | 2000<br>(1620–2460) |
| Barbados            | Both   | 3910<br>(3270–4670)         | 3:92<br>(3:49–4:37)    | 1310<br>(1100–1570) |
| Barbados            | Female | 773<br>(607–985)            | 1:53<br>(1:25–1:84)    | 501<br>(393–638)    |
| Barbados            | Male   | 3140<br>(2610–3760)         | 6:38<br>(5:68–7:12)    | 2180<br>(1820–2620) |
| Belize              | Both   | 3970<br>(3410–4580)         | 3:71<br>(3:27–4:16)    | 969<br>(833–1120)   |
| Belize              | Female | 671<br>(535–836)            | 1:47<br>(1:17–1:80)    | 326<br>(260–406)    |
| Belize              | Male   | 3300<br>(2840–3800)         | 5:39<br>(4:84–5:94)    | 1620<br>(1390–1860) |
| Bermuda             | Both   | 1460<br>(1230–1730)         | 7:94<br>(7:00–8:98)    | 2270<br>(1920–2700) |
| Bermuda             | Female | 355<br>(289–439)            | 4:30<br>(3:62–5:12)    | 1070<br>(873–1330)  |
| Bermuda             | Male   | 1100<br>(939–1300)          | 10:9<br>(9:78–12:1)    | 3560<br>(3040–4210) |
| Cuba                | Both   | 491000<br>(409000–583000)   | 14:1<br>(12:6–15:7)    | 4330<br>(3600–5130) |
| Cuba                | Female | 158000<br>(129000–189000)   | 9:65<br>(8:17–11:3)    | 2760<br>(2260–3300) |
| Cuba                | Male   | 334000<br>(274000–401000)   | 18:1<br>(16:4–19:8)    | 5900<br>(4850–7100) |
| Dominica            | Both   | 1060<br>(877–1290)          | 4:25<br>(3:80–4:71)    | 1550<br>(1280–1880) |

|                                     |        |                           |                       |                     |
|-------------------------------------|--------|---------------------------|-----------------------|---------------------|
| Dominica                            | Female | 208<br>(163–266)          | 1·86<br>(1·53–2·26)   | 620<br>(486–791)    |
| Dominica                            | Male   | 857<br>(701–1040)         | 6·19<br>(5·58–6·83)   | 2440<br>(2000–2970) |
| Dominican Republic                  | Both   | 206000<br>(162000–262000) | 6·23<br>(5·44–7·04)   | 1900<br>(1490–2410) |
| Dominican Republic                  | Female | 73100<br>(57900–92800)    | 5·11<br>(4·26–6·00)   | 1350<br>(1070–1720) |
| Dominican Republic                  | Male   | 133000<br>(104000–170000) | 7·09<br>(6·30–7·95)   | 2440<br>(1900–3110) |
| Grenada                             | Both   | 1570<br>(1390–1750)       | 4·84<br>(4·32–5·42)   | 1520<br>(1340–1690) |
| Grenada                             | Female | 325<br>(264–399)          | 2·19<br>(1·77–2·69)   | 646<br>(525–792)    |
| Grenada                             | Male   | 1240<br>(1090–1390)       | 7·07<br>(6·33–7·89)   | 2350<br>(2070–2640) |
| Guyana                              | Both   | 13500<br>(10500–17100)    | 4·35<br>(3·87–4·90)   | 1750<br>(1360–2220) |
| Guyana                              | Female | 2450<br>(1830–3270)       | 1·81<br>(1·47–2·27)   | 631<br>(470–841)    |
| Guyana                              | Male   | 11000<br>(8530–14000)     | 6·34<br>(5·72–7·03)   | 2890<br>(2240–3670) |
| Haiti                               | Both   | 96300<br>(73400–128000)   | 1·63<br>(1·34–1·97)   | 777<br>(592–1030)   |
| Haiti                               | Female | 28700<br>(21300–39500)    | 0·976<br>(0·760–1·24) | 450<br>(334–618)    |
| Haiti                               | Male   | 67600<br>(51000–89500)    | 2·28<br>(1·87–2·74)   | 1120<br>(848–1490)  |
| Jamaica                             | Both   | 45900<br>(37500–56100)    | 6·00<br>(5·29–6·69)   | 1630<br>(1330–1990) |
| Jamaica                             | Female | 10900<br>(8620–13600)     | 2·88<br>(2·40–3·39)   | 769<br>(609–963)    |
| Jamaica                             | Male   | 35000<br>(28100–43000)    | 9·06<br>(8·06–10·0)   | 2510<br>(2020–3080) |
| Puerto Rico                         | Both   | 66900<br>(53100–82000)    | 6·16<br>(5·32–7·10)   | 1900<br>(1510–2330) |
| Puerto Rico                         | Female | 21500<br>(17000–26400)    | 4·16<br>(3·46–4·94)   | 1160<br>(921–1430)  |
| Puerto Rico                         | Male   | 45400<br>(35300–56500)    | 7·99<br>(7·03–9·11)   | 2720<br>(2110–3380) |
| Saint Kitts and Nevis               | Both   | 746<br>(609–895)          | 3·67<br>(3·07–4·22)   | 1250<br>(1020–1500) |
| Saint Kitts and Nevis               | Female | 138<br>(105–180)          | 1·61<br>(1·23–2·06)   | 464<br>(352–608)    |
| Saint Kitts and Nevis               | Male   | 609<br>(494–730)          | 5·17<br>(4·29–5·94)   | 2040<br>(1650–2450) |
| Saint Lucia                         | Both   | 2930<br>(2500–3440)       | 5·33<br>(4·76–5·88)   | 1680<br>(1430–1970) |
| Saint Lucia                         | Female | 559<br>(449–686)          | 2·25<br>(1·84–2·72)   | 637<br>(511–782)    |
| Saint Lucia                         | Male   | 2370<br>(2030–2780)       | 7·88<br>(7·16–8·59)   | 2730<br>(2340–3200) |
| Saint Vincent and the<br>Grenadines | Both   | 1720<br>(1450–2040)       | 4·45<br>(3·87–5·04)   | 1520<br>(1280–1800) |

|                                  |        |                              |                      |                     |
|----------------------------------|--------|------------------------------|----------------------|---------------------|
| Saint Vincent and the Grenadines | Female | 309<br>(237–395)             | 1·80<br>(1·45–2·25)  | 558<br>(429–714)    |
| Saint Vincent and the Grenadines | Male   | 1410<br>(1190–1660)          | 6·56<br>(5·77–7·35)  | 2440<br>(2060–2860) |
| Suriname                         | Both   | 13500<br>(11200–16200)       | 6·91<br>(6·23–7·59)  | 2340<br>(1950–2810) |
| Suriname                         | Female | 3140<br>(2500–3930)          | 3·47<br>(2·81–4·21)  | 1080<br>(859–1350)  |
| Suriname                         | Male   | 10300<br>(8570–12300)        | 9·89<br>(9·06–10·7)  | 3630<br>(3010–4330) |
| Trinidad and Tobago              | Both   | 29800<br>(22800–38600)       | 6·45<br>(5·64–7·24)  | 2150<br>(1650–2780) |
| Trinidad and Tobago              | Female | 5970<br>(4410–8090)          | 2·87<br>(2·33–3·52)  | 864<br>(638–1170)   |
| Trinidad and Tobago              | Male   | 23800<br>(18300–31000)       | 9·37<br>(8·33–10·4)  | 3420<br>(2630–4450) |
| United States Virgin Islands     | Both   | 2700<br>(2230–3180)          | 6·63<br>(5·69–7·67)  | 2600<br>(2140–3060) |
| United States Virgin Islands     | Female | 787<br>(625–969)             | 4·57<br>(3·74–5·53)  | 1440<br>(1140–1770) |
| United States Virgin Islands     | Male   | 1920<br>(1600–2240)          | 8·13<br>(7·08–9·25)  | 3890<br>(3240–4550) |
| Central Latin America            | Both   | 2520000<br>(2160000–2940000) | 3·78<br>(3·39–4·15)  | 1010<br>(866–1170)  |
| Central Latin America            | Female | 706000<br>(595000–840000)    | 2·31<br>(1·99–2·61)  | 552<br>(466–657)    |
| Central Latin America            | Male   | 1820000<br>(1550000–2120000) | 5·04<br>(4·60–5·46)  | 1490<br>(1270–1740) |
| Colombia                         | Both   | 465000<br>(368000–580000)    | 4·02<br>(3·52–4·51)  | 972<br>(771–1210)   |
| Colombia                         | Female | 173000<br>(138000–216000)    | 3·23<br>(2·72–3·78)  | 710<br>(563–883)    |
| Colombia                         | Male   | 291000<br>(229000–369000)    | 4·69<br>(4·18–5·20)  | 1250<br>(982–1580)  |
| Costa Rica                       | Both   | 54000<br>(43800–66600)       | 4·96<br>(4·36–5·54)  | 1150<br>(929–1410)  |
| Costa Rica                       | Female | 14400<br>(11600–17500)       | 2·83<br>(2·39–3·28)  | 592<br>(475–721)    |
| Costa Rica                       | Male   | 39600<br>(31800–49300)       | 6·83<br>(6·11–7·52)  | 1730<br>(1390–2160) |
| El Salvador                      | Both   | 46900<br>(36000–59600)       | 2·67<br>(2·32–3·02)  | 750<br>(576–953)    |
| El Salvador                      | Female | 14100<br>(10600–18500)       | 1·80<br>(1·41–2·23)  | 424<br>(320–557)    |
| El Salvador                      | Male   | 32800<br>(25400–41700)       | 3·37<br>(2·97–3·75)  | 1120<br>(867–1420)  |
| Guatemala                        | Both   | 102000<br>(77700–132000)     | 2·00<br>(1·68–2·36)  | 574<br>(437–743)    |
| Guatemala                        | Female | 25000<br>(18100–33100)       | 1·09<br>(0·835–1·37) | 274<br>(198–362)    |
| Guatemala                        | Male   | 77000<br>(58600–99500)       | 2·75<br>(2·35–3·21)  | 891<br>(678–1150)   |
| Honduras                         | Both   | 108000<br>(92500–128000)     | 4·23<br>(3·72–4·79)  | 1100<br>(942–1300)  |

|                                       |               |                                               |                                   |                                   |
|---------------------------------------|---------------|-----------------------------------------------|-----------------------------------|-----------------------------------|
| Honduras                              | Female        | 27600<br>(21100–36300)                        | 2.16<br>(1.70–2.71)               | 548<br>(419–720)                  |
| Honduras                              | Male          | 80300<br>(68600–94400)                        | 6.31<br>(5.61–7.13)               | 1680<br>(1440–1980)               |
| Mexico                                | Both          | 1220000<br>(1030000–1440000)                  | 3.59<br>(3.16–4.06)               | 975<br>(821–1150)                 |
| Mexico                                | Female        | 297000<br>(244000–361000)                     | 1.90<br>(1.62–2.21)               | 465<br>(382–565)                  |
| Mexico                                | Male          | 921000<br>(760000–1110000)                    | 5.01<br>(4.49–5.58)               | 1510<br>(1240–1820)               |
| Nicaragua                             | Both          | 43900<br>(35700–52800)                        | 3.02<br>(2.61–3.42)               | 675<br>(548–811)                  |
| Nicaragua                             | Female        | 9050<br>(6970–11500)                          | 1.34<br>(1.06–1.65)               | 274<br>(211–350)                  |
| Nicaragua                             | Male          | 34900<br>(28400–42000)                        | 4.49<br>(3.93–5.03)               | 1090<br>(884–1310)                |
| Panama                                | Both          | 28800<br>(22600–36100)                        | 2.99<br>(2.57–3.45)               | 692<br>(543–867)                  |
| Panama                                | Female        | 7100<br>(5480–9230)                           | 1.60<br>(1.30–1.95)               | 344<br>(265–447)                  |
| Panama                                | Male          | 21700<br>(16900–27700)                        | 4.19<br>(3.69–4.73)               | 1040<br>(805–1320)                |
| Venezuela<br>(Bolivarian Republic of) | Both          | 458000<br>(352000–586000)                     | 5.50<br>(4.79–6.22)               | 1630<br>(1260–2090)               |
| Venezuela<br>(Bolivarian Republic of) | Female        | 138000<br>(106000–181000)                     | 3.76<br>(3.07–4.54)               | 966<br>(742–1270)                 |
| Venezuela<br>(Bolivarian Republic of) | Male          | 320000<br>(243000–410000)                     | 6.88<br>(6.10–7.68)               | 2320<br>(1760–2980)               |
| Tropical Latin America                | Both          | 4680000<br>(4370000–5010000)                  | 6.99<br>(6.30–7.60)               | 2090<br>(1960–2240)               |
| Tropical Latin America                | Female        | 1760000<br>(1610000–1920000)                  | 5.79<br>(5.06–6.46)               | 1540<br>(1410–1680)               |
| Tropical Latin America                | Male          | 2920000<br>(2720000–3120000)                  | 7.99<br>(7.37–8.59)               | 2670<br>(2490–2850)               |
| Brazil                                | Both          | 4570000<br>(4260000–4890000)                  | 7.00<br>(6.31–7.61)               | 2110<br>(1970–2260)               |
| Brazil                                | Female        | 1730000<br>(1580000–1890000)                  | 5.84<br>(5.11–6.53)               | 1560<br>(1430–1710)               |
| Brazil                                | Male          | 2830000<br>(2640000–3030000)                  | 7.96<br>(7.34–8.57)               | 2680<br>(2500–2870)               |
| Paraguay                              | Both          | 111000<br>(86500–140000)                      | 6.51<br>(5.61–7.39)               | 1600<br>(1250–2020)               |
| Paraguay                              | Female        | 28100<br>(21700–36500)                        | 3.63<br>(2.93–4.44)               | 821<br>(634–1070)                 |
| Paraguay                              | Male          | 82600<br>(64800–104000)                       | 8.93<br>(7.87–10.0)               | 2350<br>(1850–2960)               |
| <b>North Africa and Middle East</b>   | <b>Both</b>   | <b>11500000</b><br><b>(10200000–12900000)</b> | <b>7.02</b><br><b>(6.39–7.61)</b> | <b>1890</b><br><b>(1680–2120)</b> |
| <b>North Africa and Middle East</b>   | <b>Female</b> | <b>1440000</b><br><b>(1290000–1620000)</b>    | <b>1.90</b><br><b>(1.69–2.12)</b> | <b>493</b><br><b>(440–555)</b>    |
| <b>North Africa and Middle East</b>   | <b>Male</b>   | <b>10000000</b><br><b>(8900000–11300000)</b>  | <b>11.4</b><br><b>(10.5–12.3)</b> | <b>3170</b><br><b>(2820–3570)</b> |
| North Africa and Middle East          | Both          | 11500000<br>(10200000–12900000)               | 7.02<br>(6.39–7.61)               | 1890<br>(1680–2120)               |



|                              |        |                              |                        |                     |
|------------------------------|--------|------------------------------|------------------------|---------------------|
| North Africa and Middle East | Female | 1440000<br>(1290000–1620000) | 1·90<br>(1·69–2·12)    | 493<br>(440–555)    |
| North Africa and Middle East | Male   | 1000000<br>(890000–1130000)  | 11·4<br>(10·5–12·3)    | 3170<br>(2820–3570) |
| Afghanistan                  | Both   | 356000<br>(275000–450000)    | 2·08<br>(1·65–2·49)    | 931<br>(719–1180)   |
| Afghanistan                  | Female | 70300<br>(49300–98100)       | 0·835<br>(0·607–1·16)  | 377<br>(264–526)    |
| Afghanistan                  | Male   | 286000<br>(218000–360000)    | 3·29<br>(2·60–3·93)    | 1460<br>(1110–1830) |
| Algeria                      | Both   | 607000<br>(508000–727000)    | 6·00<br>(5·23–6·79)    | 1450<br>(1210–1740) |
| Algeria                      | Female | 52800<br>(39900–69200)       | 1·05<br>(0·826–1·34)   | 256<br>(193–335)    |
| Algeria                      | Male   | 554000<br>(464000–664000)    | 10·9<br>(9·63–12·2)    | 2610<br>(2190–3130) |
| Bahrain                      | Both   | 19900<br>(16200–24200)       | 6·96<br>(5·88–8·11)    | 1380<br>(1130–1680) |
| Bahrain                      | Female | 2460<br>(1870–3290)          | 2·19<br>(1·67–2·91)    | 452<br>(344–603)    |
| Bahrain                      | Male   | 17400<br>(14100–21100)       | 10·1<br>(8·61–11·6)    | 1940<br>(1580–2350) |
| Egypt                        | Both   | 2290000<br>(1820000–2930000) | 8·68<br>(7·64–9·86)    | 2310<br>(1840–2950) |
| Egypt                        | Female | 78000<br>(53700–108000)      | 0·655<br>(0·477–0·878) | 164<br>(112–226)    |
| Egypt                        | Male   | 2210000<br>(1760000–2830000) | 15·3<br>(13·7–17·2)    | 4310<br>(3420–5520) |
| Iran (Islamic Republic of)   | Both   | 1230000<br>(1130000–1340000) | 6·22<br>(5·53–6·90)    | 1460<br>(1340–1590) |
| Iran (Islamic Republic of)   | Female | 177000<br>(149000–211000)    | 1·93<br>(1·57–2·33)    | 427<br>(360–508)    |
| Iran (Islamic Republic of)   | Male   | 1050000<br>(969000–1140000)  | 9·97<br>(9·10–10·9)    | 2460<br>(2260–2670) |
| Iraq                         | Both   | 750000<br>(591000–911000)    | 7·29<br>(6·21–8·30)    | 1780<br>(1400–2160) |
| Iraq                         | Female | 112000<br>(85500–144000)     | 2·38<br>(1·89–2·94)    | 546<br>(416–700)    |
| Iraq                         | Male   | 638000<br>(503000–774000)    | 11·4<br>(9·92–12·8)    | 2960<br>(2330–3590) |
| Jordan                       | Both   | 161000<br>(135000–192000)    | 7·54<br>(6·37–8·67)    | 1380<br>(1160–1650) |
| Jordan                       | Female | 25600<br>(21100–30800)       | 2·55<br>(2·18–2·96)    | 473<br>(388–569)    |
| Jordan                       | Male   | 135000<br>(111000–164000)    | 11·9<br>(10·2–13·5)    | 2180<br>(1790–2650) |
| Kuwait                       | Both   | 57600<br>(48200–68600)       | 7·60<br>(6·51–8·75)    | 1300<br>(1090–1550) |
| Kuwait                       | Female | 3570<br>(2730–4610)          | 1·08<br>(0·843–1·38)   | 174<br>(133–224)    |
| Kuwait                       | Male   | 54000<br>(44900–64600)       | 12·6<br>(11·1–14·0)    | 2280<br>(1890–2730) |
| Lebanon                      | Both   | 203000<br>(174000–231000)    | 15·0<br>(13·4–16·7)    | 3920<br>(3370–4470) |

|                      |        |                           |                        |                     |
|----------------------|--------|---------------------------|------------------------|---------------------|
| Lebanon              | Female | 71600<br>(61700–83500)    | 10.9<br>(9.42–12.5)    | 2720<br>(2350–3180) |
| Lebanon              | Male   | 131000<br>(113000–150000) | 19.0<br>(17.1–20.7)    | 5150<br>(4440–5900) |
| Libya                | Both   | 120000<br>(97700–148000)  | 7.01<br>(6.11–8.02)    | 1780<br>(1450–2190) |
| Libya                | Female | 3640<br>(2570–5060)       | 0.457<br>(0.338–0.625) | 112<br>(78.9–155)   |
| Libya                | Male   | 116000<br>(94600–143000)  | 12.7<br>(11.3–14.5)    | 3330<br>(2720–4120) |
| Morocco              | Both   | 637000<br>(493000–768000) | 6.30<br>(5.32–7.16)    | 1770<br>(1370–2140) |
| Morocco              | Female | 42700<br>(30900–58000)    | 0.860<br>(0.650–1.12)  | 239<br>(173–324)    |
| Morocco              | Male   | 594000<br>(456000–716000) | 11.5<br>(9.95–13.0)    | 3290<br>(2520–3960) |
| Oman                 | Both   | 29100<br>(25200–33800)    | 3.40<br>(2.93–3.88)    | 635<br>(549–738)    |
| Oman                 | Female | 2570<br>(1950–3360)       | 0.828<br>(0.610–1.08)  | 158<br>(120–206)    |
| Oman                 | Male   | 26600<br>(22700–30900)    | 4.87<br>(4.25–5.52)    | 899<br>(769–1050)   |
| Palestine            | Both   | 66200<br>(57000–76700)    | 6.65<br>(5.65–7.65)    | 1340<br>(1150–1550) |
| Palestine            | Female | 5730<br>(4400–7260)       | 1.21<br>(0.924–1.54)   | 236<br>(181–298)    |
| Palestine            | Male   | 60500<br>(52000–69900)    | 11.6<br>(10.0–13.1)    | 2400<br>(2060–2770) |
| Qatar                | Both   | 20800<br>(16600–25600)    | 4.63<br>(3.97–5.41)    | 727<br>(579–895)    |
| Qatar                | Female | 686<br>(486–949)          | 0.570<br>(0.420–0.779) | 94.4<br>(66.8–131)  |
| Qatar                | Male   | 20100<br>(16000–24800)    | 6.13<br>(5.31–7.08)    | 942<br>(750–1160)   |
| Saudi Arabia         | Both   | 492000<br>(395000–605000) | 5.90<br>(5.08–6.87)    | 1380<br>(1100–1690) |
| Saudi Arabia         | Female | 34800<br>(24500–48300)    | 1.10<br>(0.794–1.46)   | 234<br>(165–324)    |
| Saudi Arabia         | Male   | 457000<br>(366000–561000) | 8.88<br>(7.73–10.3)    | 2190<br>(1760–2690) |
| Sudan                | Both   | 492000<br>(379000–630000) | 3.88<br>(3.09–4.84)    | 1210<br>(929–1540)  |
| Sudan                | Female | 53200<br>(35500–75900)    | 0.914<br>(0.620–1.28)  | 264<br>(177–377)    |
| Sudan                | Male   | 439000<br>(339000–564000) | 6.40<br>(5.16–7.85)    | 2120<br>(1640–2730) |
| Syrian Arab Republic | Both   | 399000<br>(309000–526000) | 10.2<br>(8.68–11.7)    | 2760<br>(2140–3630) |
| Syrian Arab Republic | Female | 57700<br>(41900–78600)    | 3.11<br>(2.37–3.97)    | 776<br>(564–1060)   |
| Syrian Arab Republic | Male   | 342000<br>(261000–450000) | 16.5<br>(14.4–18.7)    | 4840<br>(3700–6370) |
| Tunisia              | Both   | 296000<br>(231000–376000) | 10.3<br>(8.84–11.8)    | 2560<br>(1990–3250) |

|                      |               |                                               |                                   |                                   |
|----------------------|---------------|-----------------------------------------------|-----------------------------------|-----------------------------------|
| Tunisia              | Female        | 21200<br>(15400–28500)                        | 1.56<br>(1.19–1.97)               | 365<br>(265–491)                  |
| Tunisia              | Male          | 275000<br>(214000–348000)                     | 18.1<br>(16.1–20.2)               | 4770<br>(3710–6050)               |
| Turkey               | Both          | 2520000<br>(2100000–3020000)                  | 12.9<br>(11.2–14.4)               | 3100<br>(2580–3710)               |
| Turkey               | Female        | 479000<br>(402000–571000)                     | 5.06<br>(4.38–5.77)               | 1190<br>(999–1420)                |
| Turkey               | Male          | 2040000<br>(1700000–2460000)                  | 20.2<br>(17.8–22.2)               | 4970<br>(4130–5990)               |
| United Arab Emirates | Both          | 176000<br>(136000–228000)                     | 8.21<br>(6.90–9.53)               | 1900<br>(1470–2470)               |
| United Arab Emirates | Female        | 9260<br>(6680–12400)                          | 1.87<br>(1.41–2.42)               | 366<br>(264–491)                  |
| United Arab Emirates | Male          | 166000<br>(128000–217000)                     | 10.1<br>(8.56–11.7)               | 2480<br>(1910–3230)               |
| Yemen                | Both          | 539000<br>(425000–706000)                     | 4.63<br>(3.91–5.51)               | 1710<br>(1350–2240)               |
| Yemen                | Female        | 135000<br>(103000–181000)                     | 2.47<br>(2.00–3.06)               | 868<br>(663–1160)                 |
| Yemen                | Male          | 404000<br>(318000–530000)                     | 6.55<br>(5.56–7.75)               | 2530<br>(2000–3330)               |
| <b>South Asia</b>    | <b>Both</b>   | <b>34400000</b><br><b>(30400000–39400000)</b> | <b>5.61</b><br><b>(4.93–6.26)</b> | <b>1910</b><br><b>(1680–2180)</b> |
| <b>South Asia</b>    | <b>Female</b> | <b>4930000</b><br><b>(4040000–5860000)</b>    | <b>1.66</b><br><b>(1.38–1.95)</b> | <b>558</b><br><b>(457–663)</b>    |
| <b>South Asia</b>    | <b>Male</b>   | <b>29500000</b><br><b>(25500000–34200000)</b> | <b>9.32</b><br><b>(8.34–10.2)</b> | <b>3200</b><br><b>(2760–3710)</b> |
| South Asia           | Both          | 34400000<br>(30400000–39400000)               | 5.61<br>(4.93–6.26)               | 1910<br>(1680–2180)               |
| South Asia           | Female        | 4930000<br>(4040000–5860000)                  | 1.66<br>(1.38–1.95)               | 558<br>(457–663)                  |
| South Asia           | Male          | 29500000<br>(25500000–34200000)               | 9.32<br>(8.34–10.2)               | 3200<br>(2760–3710)               |
| Bangladesh           | Both          | 2870000<br>(2380000–3460000)                  | 6.67<br>(5.84–7.53)               | 1800<br>(1490–2170)               |
| Bangladesh           | Female        | 202000<br>(156000–259000)                     | 0.966<br>(0.768–1.21)             | 251<br>(194–321)                  |
| Bangladesh           | Male          | 2670000<br>(2200000–3210000)                  | 12.1<br>(10.7–13.4)               | 3400<br>(2800–4090)               |
| Bhutan               | Both          | 8210<br>(6400–10300)                          | 3.85<br>(3.14–4.60)               | 1090<br>(849–1360)                |
| Bhutan               | Female        | 1920<br>(1400–2590)                           | 1.89<br>(1.43–2.43)               | 531<br>(388–716)                  |
| Bhutan               | Male          | 6300<br>(4830–7980)                           | 5.61<br>(4.58–6.77)               | 1600<br>(1230–2030)               |
| India                | Both          | 26800000<br>(22900000–31500000)               | 5.74<br>(4.91–6.54)               | 1930<br>(1650–2260)               |
| India                | Female        | 3930000<br>(3070000–4810000)                  | 1.73<br>(1.39–2.08)               | 580<br>(453–710)                  |
| India                | Male          | 22900000<br>(19100000–27600000)               | 9.52<br>(8.36–10.6)               | 3210<br>(2670–3870)               |
| Nepal                | Both          | 792000<br>(654000–916000)                     | 8.53<br>(7.45–9.57)               | 2600<br>(2150–3010)               |

|                                               |               |                                         |                             |                             |
|-----------------------------------------------|---------------|-----------------------------------------|-----------------------------|-----------------------------|
| Nepal                                         | Female        | 290000<br>(237000–344000)               | 6.39<br>(5.31–7.49)         | 1820<br>(1490–2160)         |
| Nepal                                         | Male          | 502000<br>(408000–584000)               | 10.6<br>(9.27–11.9)         | 3460<br>(2810–4030)         |
| Pakistan                                      | Both          | 3940000<br>(3140000–4910000)            | 4.19<br>(3.37–5.07)         | 1760<br>(1400–2190)         |
| Pakistan                                      | Female        | 506000<br>(392000–663000)               | 1.13<br>(0.897–1.42)        | 463<br>(359–607)            |
| Pakistan                                      | Male          | 3440000<br>(2650000–4420000)            | 6.96<br>(5.62–8.38)         | 2990<br>(2300–3850)         |
| <b>Southeast Asia, East Asia, and Oceania</b> | <b>Both</b>   | <b>77600000<br/>(67900000–88300000)</b> | <b>12.9<br/>(11.3–14.5)</b> | <b>3590<br/>(3140–4090)</b> |
| <b>Southeast Asia, East Asia, and Oceania</b> | <b>Female</b> | <b>8950000<br/>(7640000–10400000)</b>   | <b>3.35<br/>(2.88–3.86)</b> | <b>839<br/>(716–974)</b>    |
| <b>Southeast Asia, East Asia, and Oceania</b> | <b>Male</b>   | <b>68700000<br/>(59300000–79300000)</b> | <b>20.6<br/>(18.7–22.4)</b> | <b>6280<br/>(5420–7260)</b> |
| East Asia                                     | Both          | 59100000<br>(50000000–69700000)         | 14.9<br>(12.8–16.9)         | 4020<br>(3390–4730)         |
| East Asia                                     | Female        | 6930000<br>(5710000–8310000)            | 3.95<br>(3.34–4.60)         | 959<br>(791–1150)           |
| East Asia                                     | Male          | 52200000<br>(43100000–62600000)         | 23.6<br>(21.3–25.6)         | 6960<br>(5750–8350)         |
| China                                         | Both          | 57300000<br>(48200000–68000000)         | 15.0<br>(12.9–17.0)         | 4030<br>(3390–4780)         |
| China                                         | Female        | 6710000<br>(5510000–8090000)            | 3.98<br>(3.37–4.66)         | 962<br>(789–1160)           |
| China                                         | Male          | 50500000<br>(41600000–61000000)         | 23.7<br>(21.4–25.8)         | 6970<br>(5740–8420)         |
| Democratic People's Republic of Korea         | Both          | 1200000<br>(1020000–1380000)            | 13.9<br>(12.5–15.2)         | 4560<br>(3880–5260)         |
| Democratic People's Republic of Korea         | Female        | 168000<br>(128000–217000)               | 4.04<br>(3.13–5.15)         | 1270<br>(968–1650)          |
| Democratic People's Republic of Korea         | Male          | 1030000<br>(865000–1180000)             | 23.0<br>(21.1–24.7)         | 7870<br>(6630–9060)         |
| Taiwan (Province of China)                    | Both          | 687000<br>(545000–859000)               | 10.7<br>(9.51–12.0)         | 2910<br>(2310–3640)         |
| Taiwan (Province of China)                    | Female        | 53500<br>(40800–69900)                  | 1.86<br>(1.51–2.28)         | 449<br>(343–587)            |
| Taiwan (Province of China)                    | Male          | 633000<br>(502000–790000)               | 17.9<br>(16.4–19.5)         | 5410<br>(4290–6740)         |
| Oceania                                       | Both          | 366000<br>(298000–452000)               | 6.47<br>(5.79–7.16)         | 2750<br>(2240–3400)         |
| Oceania                                       | Female        | 101000<br>(80000–126000)                | 3.97<br>(3.41–4.59)         | 1570<br>(1240–1960)         |
| Oceania                                       | Male          | 264000<br>(214000–325000)               | 8.53<br>(7.67–9.39)         | 3860<br>(3120–4750)         |
| American Samoa                                | Both          | 1780<br>(1510–2070)                     | 10.8<br>(9.71–11.9)         | 3200<br>(2730–3740)         |
| American Samoa                                | Female        | 539<br>(432–662)                        | 7.08<br>(5.97–8.22)         | 1950<br>(1570–2400)         |
| American Samoa                                | Male          | 1240<br>(1050–1430)                     | 13.9<br>(12.7–15.3)         | 4430<br>(3760–5120)         |
| Cook Islands                                  | Both          | 638<br>(533–754)                        | 10.9<br>(9.50–12.3)         | 3550<br>(2970–4190)         |

|                                     |        |                        |                     |                      |
|-------------------------------------|--------|------------------------|---------------------|----------------------|
| Cook Islands                        | Female | 165<br>(128–209)       | 6·46<br>(5·19–7·71) | 1790<br>(1390–2270)  |
| Cook Islands                        | Male   | 473<br>(399–552)       | 14·4<br>(12·8–16·0) | 5390<br>(4550–6290)  |
| Fiji                                | Both   | 30000<br>(23800–37300) | 9·13<br>(8·15–10·0) | 3300<br>(2610–4100)  |
| Fiji                                | Female | 6260<br>(4840–7970)    | 4·12<br>(3·47–4·76) | 1390<br>(1080–1770)  |
| Fiji                                | Male   | 23800<br>(18700–29600) | 13·4<br>(12·1–14·7) | 5150<br>(4060–6410)  |
| Guam                                | Both   | 4960<br>(4140–5940)    | 10·3<br>(9·01–11·7) | 2910<br>(2420–3480)  |
| Guam                                | Female | 1510<br>(1230–1830)    | 7·05<br>(5·93–8·31) | 1820<br>(1480–2210)  |
| Guam                                | Male   | 3450<br>(2890–4110)    | 12·8<br>(11·4–14·3) | 3920<br>(3280–4670)  |
| Kiribati                            | Both   | 8560<br>(6820–10500)   | 15·0<br>(13·4–16·6) | 7210<br>(5750–8810)  |
| Kiribati                            | Female | 2950<br>(2330–3660)    | 11·4<br>(9·92–13·0) | 4880<br>(3850–6060)  |
| Kiribati                            | Male   | 5610<br>(4490–6850)    | 18·0<br>(16·2–19·9) | 9640<br>(7730–11800) |
| Marshall Islands                    | Both   | 1890<br>(1460–2380)    | 8·86<br>(7·60–10·1) | 3330<br>(2570–4190)  |
| Marshall Islands                    | Female | 383<br>(276–513)       | 4·03<br>(3·09–5·04) | 1380<br>(994–1850)   |
| Marshall Islands                    | Male   | 1510<br>(1170–1900)    | 12·7<br>(11·0–14·5) | 5180<br>(4010–6520)  |
| Micronesia<br>(Federated States of) | Both   | 5590<br>(3830–7140)    | 13·3<br>(9·47–15·6) | 5470<br>(3750–6990)  |
| Micronesia<br>(Federated States of) | Female | 1720<br>(1230–2260)    | 9·46<br>(7·05–11·5) | 3440<br>(2460–4500)  |
| Micronesia<br>(Federated States of) | Male   | 3860<br>(2540–4950)    | 16·3<br>(10·9–19·1) | 7430<br>(4880–9510)  |
| Nauru                               | Both   | 430<br>(350–524)       | 11·1<br>(9·82–12·5) | 4070<br>(3320–4970)  |
| Nauru                               | Female | 171<br>(131–223)       | 10·3<br>(8·75–12·1) | 3280<br>(2510–4260)  |
| Nauru                               | Male   | 258<br>(200–322)       | 11·7<br>(10·2–13·3) | 4850<br>(3750–6040)  |
| Niue                                | Both   | 72·7<br>(59·3–87·3)    | 10·6<br>(9·37–12·0) | 4350<br>(3550–5220)  |
| Niue                                | Female | 20·8<br>(15·9–26·7)    | 6·61<br>(5·44–7·92) | 2510<br>(1920–3210)  |
| Niue                                | Male   | 51·9<br>(42·8–61·1)    | 14·1<br>(12·6–15·7) | 6180<br>(5090–7270)  |
| Northern Mariana<br>Islands         | Both   | 1890<br>(1600–2220)    | 12·7<br>(11·2–14·2) | 4450<br>(3760–5220)  |
| Northern Mariana<br>Islands         | Female | 397<br>(300–527)       | 6·49<br>(5·06–8·09) | 1930<br>(1460–2570)  |
| Northern Mariana<br>Islands         | Male   | 1490<br>(1270–1720)    | 17·1<br>(15·4–18·8) | 6810<br>(5780–7830)  |
| Palau                               | Both   | 996<br>(778–1260)      | 11·8<br>(10·3–13·5) | 5530<br>(4320–7000)  |

|                  |        |                                 |                     |                      |
|------------------|--------|---------------------------------|---------------------|----------------------|
| Palau            | Female | 212<br>(155–279)                | 6.40<br>(5.03–7.99) | 2590<br>(1890–3410)  |
| Palau            | Male   | 784<br>(616–988)                | 15.3<br>(13.5–17.3) | 7980<br>(6270–10100) |
| Papua New Guinea | Both   | 239000<br>(182000–308000)       | 5.52<br>(4.76–6.37) | 2420<br>(1850–3120)  |
| Papua New Guinea | Female | 70000<br>(52200–91300)          | 3.58<br>(2.93–4.31) | 1470<br>(1100–1920)  |
| Papua New Guinea | Male   | 169000<br>(131000–217000)       | 7.12<br>(6.17–8.15) | 3310<br>(2560–4260)  |
| Samoa            | Both   | 7070<br>(5850–8630)             | 11.9<br>(10.5–13.0) | 3350<br>(2770–4080)  |
| Samoa            | Female | 2120<br>(1640–2700)             | 7.60<br>(6.38–8.89) | 2060<br>(1600–2630)  |
| Samoa            | Male   | 4960<br>(4140–5970)             | 15.6<br>(14.0–17.1) | 4560<br>(3810–5490)  |
| Solomon Islands  | Both   | 34600<br>(27800–42200)          | 11.2<br>(9.99–12.3) | 5270<br>(4230–6440)  |
| Solomon Islands  | Female | 8720<br>(6580–11100)            | 6.27<br>(5.21–7.26) | 2720<br>(2050–3440)  |
| Solomon Islands  | Male   | 25800<br>(20800–31500)          | 15.2<br>(13.7–16.7) | 7730<br>(6220–9410)  |
| Tokelau          | Both   | 43.8<br>(34.8–54.7)             | 10.2<br>(8.82–11.6) | 3110<br>(2470–3880)  |
| Tokelau          | Female | 16.1<br>(11.7–21.5)             | 6.99<br>(5.49–8.69) | 2340<br>(1700–3120)  |
| Tokelau          | Male   | 27.7<br>(22.4–34.3)             | 13.9<br>(12.1–15.6) | 3840<br>(3100–4740)  |
| Tonga            | Both   | 2620<br>(2190–3120)             | 9.64<br>(8.63–10.6) | 2560<br>(2140–3050)  |
| Tonga            | Female | 480<br>(375–598)                | 3.87<br>(3.20–4.60) | 934<br>(728–1160)    |
| Tonga            | Male   | 2140<br>(1790–2540)             | 14.5<br>(13.2–15.8) | 4210<br>(3510–4980)  |
| Tuvalu           | Both   | 518<br>(408–665)                | 11.9<br>(10.5–13.3) | 4390<br>(3460–5640)  |
| Tuvalu           | Female | 161<br>(119–210)                | 7.98<br>(6.54–9.53) | 2840<br>(2100–3710)  |
| Tuvalu           | Male   | 357<br>(282–457)                | 15.2<br>(13.5–16.9) | 5830<br>(4610–7470)  |
| Vanuatu          | Both   | 7730<br>(6180–9870)             | 7.16<br>(6.39–8.01) | 2620<br>(2100–3350)  |
| Vanuatu          | Female | 682<br>(493–918)                | 1.48<br>(1.15–1.83) | 469<br>(339–632)     |
| Vanuatu          | Male   | 7040<br>(5670–8990)             | 11.4<br>(10.2–12.6) | 4720<br>(3790–6020)  |
| Southeast Asia   | Both   | 18100000<br>(16200000–20100000) | 9.14<br>(8.32–9.94) | 2690<br>(2410–2980)  |
| Southeast Asia   | Female | 1920000<br>(1710000–2160000)    | 2.14<br>(1.87–2.41) | 570<br>(506–641)     |
| Southeast Asia   | Male   | 16200000<br>(14400000–18000000) | 14.9<br>(13.8–15.9) | 4810<br>(4280–5350)  |
| Cambodia         | Both   | 447000<br>(367000–523000)       | 8.32<br>(7.25–9.28) | 2690<br>(2210–3150)  |

|                                     |        |                              |                     |                     |
|-------------------------------------|--------|------------------------------|---------------------|---------------------|
| Cambodia                            | Female | 63100<br>(49700–77600)       | 2.47<br>(2.04–3.00) | 747<br>(588–918)    |
| Cambodia                            | Male   | 384000<br>(315000–448000)    | 13.6<br>(12.0–15.0) | 4710<br>(3860–5500) |
| Indonesia                           | Both   | 7430000<br>(6180000–8910000) | 9.59<br>(8.31–10.9) | 2860<br>(2380–3430) |
| Indonesia                           | Female | 617000<br>(490000–761000)    | 1.71<br>(1.42–2.01) | 480<br>(381–592)    |
| Indonesia                           | Male   | 6810000<br>(5580000–8310000) | 16.5<br>(14.8–17.9) | 5200<br>(4260–6350) |
| Lao People's<br>Democratic Republic | Both   | 169000<br>(135000–202000)    | 7.11<br>(6.23–7.86) | 2360<br>(1890–2830) |
| Lao People's<br>Democratic Republic | Female | 20700<br>(15700–26600)       | 1.92<br>(1.54–2.35) | 583<br>(441–747)    |
| Lao People's<br>Democratic Republic | Male   | 148000<br>(119000–178000)    | 11.5<br>(10.1–12.6) | 4110<br>(3300–4950) |
| Malaysia                            | Both   | 701000<br>(576000–851000)    | 9.06<br>(7.96–10.1) | 2240<br>(1840–2720) |
| Malaysia                            | Female | 47100<br>(36800–59700)       | 1.40<br>(1.11–1.71) | 311<br>(244–395)    |
| Malaysia                            | Male   | 654000<br>(534000–795000)    | 14.9<br>(13.4–16.4) | 4040<br>(3300–4910) |
| Maldives                            | Both   | 6180<br>(5290–7100)          | 6.82<br>(5.95–7.68) | 1240<br>(1060–1420) |
| Maldives                            | Female | 658<br>(521–819)             | 1.80<br>(1.45–2.22) | 332<br>(263–413)    |
| Maldives                            | Male   | 5530<br>(4750–6360)          | 10.2<br>(9.02–11.4) | 1840<br>(1580–2120) |
| Mauritius                           | Both   | 30500<br>(25200–36200)       | 7.22<br>(6.48–7.92) | 2390<br>(1980–2840) |
| Mauritius                           | Female | 2780<br>(2150–3540)          | 1.44<br>(1.17–1.76) | 429<br>(333–547)    |
| Mauritius                           | Male   | 27700<br>(23000–33200)       | 12.0<br>(11.0–13.0) | 4400<br>(3650–5270) |
| Myanmar                             | Both   | 1550000<br>(1330000–1830000) | 7.99<br>(7.20–8.77) | 2830<br>(2430–3340) |
| Myanmar                             | Female | 356000<br>(299000–426000)    | 3.96<br>(3.32–4.63) | 1250<br>(1050–1500) |
| Myanmar                             | Male   | 1190000<br>(1020000–1420000) | 11.5<br>(10.4–12.6) | 4540<br>(3870–5400) |
| Philippines                         | Both   | 2940000<br>(2410000–3610000) | 8.99<br>(7.75–10.3) | 2620<br>(2150–3220) |
| Philippines                         | Female | 467000<br>(374000–584000)    | 3.24<br>(2.72–3.78) | 844<br>(677–1060)   |
| Philippines                         | Male   | 2480000<br>(1960000–3140000) | 13.5<br>(11.9–15.1) | 4350<br>(3440–5520) |
| Seychelles                          | Both   | 3080<br>(2700–3530)          | 9.68<br>(8.68–10.8) | 3020<br>(2640–3450) |
| Seychelles                          | Female | 293<br>(230–369)             | 2.25<br>(1.81–2.81) | 606<br>(474–763)    |
| Seychelles                          | Male   | 2790<br>(2420–3200)          | 14.8<br>(13.5–16.2) | 5190<br>(4500–5950) |
| Sri Lanka                           | Both   | 313000<br>(245000–396000)    | 5.46<br>(4.77–6.13) | 1430<br>(1120–1810) |

|                                  |               |                                            |                                      |                                  |
|----------------------------------|---------------|--------------------------------------------|--------------------------------------|----------------------------------|
| Sri Lanka                        | Female        | 24600<br>(18100–32400)                     | 0.933<br>(0.726–1.16)                | 218<br>(160–287)                 |
| Sri Lanka                        | Male          | 288000<br>(225000–365000)                  | 9.35<br>(8.39–10.3)                  | 2730<br>(2130–3460)              |
| Thailand                         | Both          | 1700000<br>(1320000–2150000)               | 8.26<br>(7.18–9.33)                  | 2430<br>(1890–3070)              |
| Thailand                         | Female        | 162000<br>(126000–204000)                  | 1.78<br>(1.47–2.11)                  | 450<br>(352–568)                 |
| Thailand                         | Male          | 1540000<br>(1190000–1950000)               | 13.4<br>(12.0–14.8)                  | 4500<br>(3480–5710)              |
| Timor-Leste                      | Both          | 25100<br>(19100–30700)                     | 6.21<br>(4.78–7.49)                  | 1880<br>(1430–2300)              |
| Timor-Leste                      | Female        | 2170<br>(1500–3050)                        | 1.17<br>(0.830–1.64)                 | 328<br>(228–462)                 |
| Timor-Leste                      | Male          | 23000<br>(17300–28000)                     | 10.4<br>(7.98–12.5)                  | 3400<br>(2570–4140)              |
| Viet Nam                         | Both          | 2770000<br>(2300000–3270000)               | 10.7<br>(9.59–11.8)                  | 2880<br>(2390–3390)              |
| Viet Nam                         | Female        | 156000<br>(121000–196000)                  | 1.41<br>(1.13–1.77)                  | 321<br>(249–404)                 |
| Viet Nam                         | Male          | 2620000<br>(2170000–3100000)               | 17.7<br>(16.2–19.2)                  | 5480<br>(4550–6490)              |
| <b>Sub-Saharan Africa</b>        | <b>Both</b>   | <b>6980000</b><br><b>(6100000–8030000)</b> | <b>1.37</b><br><b>(1.19–1.54)</b>    | <b>648</b><br><b>(566–744)</b>   |
| <b>Sub-Saharan Africa</b>        | <b>Female</b> | <b>1030000</b><br><b>(881000–1210000)</b>  | <b>0.430</b><br><b>(0.370–0.492)</b> | <b>188</b><br><b>(161–221)</b>   |
| <b>Sub-Saharan Africa</b>        | <b>Male</b>   | <b>5960000</b><br><b>(5190000–6850000)</b> | <b>2.20</b><br><b>(1.91–2.48)</b>    | <b>1120</b><br><b>(977–1290)</b> |
| Central Sub-Saharan Africa       | Both          | 924000<br>(732000–1150000)                 | 1.60<br>(1.37–1.85)                  | 702<br>(556–871)                 |
| Central Sub-Saharan Africa       | Female        | 93900<br>(70300–123000)                    | 0.347<br>(0.276–0.431)               | 142<br>(106–186)                 |
| Central Sub-Saharan Africa       | Male          | 830000<br>(663000–1030000)                 | 2.70<br>(2.31–3.13)                  | 1270<br>(1010–1580)              |
| Angola                           | Both          | 251000<br>(202000–310000)                  | 2.00<br>(1.78–2.24)                  | 834<br>(670–1030)                |
| Angola                           | Female        | 31400<br>(22500–42700)                     | 0.527<br>(0.402–0.682)               | 202<br>(145–275)                 |
| Angola                           | Male          | 220000<br>(176000–271000)                  | 3.32<br>(2.98–3.71)                  | 1500<br>(1200–1850)              |
| Central African Republic         | Both          | 71200<br>(53400–94400)                     | 1.61<br>(1.36–1.90)                  | 1340<br>(1010–1780)              |
| Central African Republic         | Female        | 5480<br>(3590–8080)                        | 0.274<br>(0.199–0.368)               | 203<br>(133–299)                 |
| Central African Republic         | Male          | 65700<br>(49200–86700)                     | 2.72<br>(2.29–3.22)                  | 2530<br>(1890–3340)              |
| Congo                            | Both          | 46200<br>(35700–58400)                     | 2.23<br>(1.91–2.55)                  | 877<br>(678–1110)                |
| Congo                            | Female        | 4150<br>(2940–5820)                        | 0.407<br>(0.307–0.531)               | 156<br>(111–219)                 |
| Congo                            | Male          | 42000<br>(32300–53500)                     | 4.01<br>(3.44–4.56)                  | 1610<br>(1240–2050)              |
| Democratic Republic of the Congo | Both          | 532000<br>(406000–690000)                  | 1.42<br>(1.14–1.73)                  | 607<br>(463–787)                 |



|                                  |        |                              |                          |                     |
|----------------------------------|--------|------------------------------|--------------------------|---------------------|
| Democratic Republic of the Congo | Female | 50900<br>(36400–70800)       | 0.291<br>(0.214–0.381)   | 116<br>(83.1–162)   |
| Democratic Republic of the Congo | Male   | 481000<br>(366000–623000)    | 2.41<br>(1.92–2.95)      | 1100<br>(834–1420)  |
| Equatorial Guinea                | Both   | 6160<br>(4420–8530)          | 1.22<br>(0.938–1.53)     | 434<br>(312–601)    |
| Equatorial Guinea                | Female | 566<br>(353–884)             | 0.231<br>(0.153–0.335)   | 86.7<br>(54.0–135)  |
| Equatorial Guinea                | Male   | 5590<br>(4030–7690)          | 2.17<br>(1.70–2.66)      | 729<br>(526–1000)   |
| Gabon                            | Both   | 16800<br>(13300–20800)       | 2.70<br>(2.24–3.22)      | 962<br>(759–1190)   |
| Gabon                            | Female | 1320<br>(924–1850)           | 0.460<br>(0.328–0.623)   | 146<br>(102–204)    |
| Gabon                            | Male   | 15500<br>(12300–19200)       | 4.62<br>(3.86–5.45)      | 1840<br>(1450–2270) |
| Eastern Sub-Saharan Africa       | Both   | 2610000<br>(2250000–3020000) | 1.53<br>(1.33–1.74)      | 635<br>(546–734)    |
| Eastern Sub-Saharan Africa       | Female | 390000<br>(318000–467000)    | 0.492<br>(0.410–0.580)   | 188<br>(153–225)    |
| Eastern Sub-Saharan Africa       | Male   | 2220000<br>(1900000–2580000) | 2.42<br>(2.10–2.76)      | 1090<br>(930–1260)  |
| Burundi                          | Both   | 91900<br>(68600–121000)      | 1.61<br>(1.33–1.92)      | 770<br>(575–1010)   |
| Burundi                          | Female | 12000<br>(8180–17200)        | 0.465<br>(0.345–0.610)   | 200<br>(136–286)    |
| Burundi                          | Male   | 79900<br>(59600–104000)      | 2.56<br>(2.12–3.04)      | 1350<br>(1010–1760) |
| Comoros                          | Both   | 7010<br>(5390–8860)          | 2.70<br>(2.16–3.29)      | 981<br>(755–1240)   |
| Comoros                          | Female | 866<br>(597–1210)            | 0.682<br>(0.483–0.928)   | 242<br>(167–339)    |
| Comoros                          | Male   | 6140<br>(4700–7800)          | 4.65<br>(3.73–5.62)      | 1720<br>(1320–2190) |
| Djibouti                         | Both   | 16300<br>(11800–22000)       | 3.48<br>(2.91–4.13)      | 1350<br>(980–1830)  |
| Djibouti                         | Female | 1290<br>(876–1890)           | 0.619<br>(0.452–0.823)   | 230<br>(156–336)    |
| Djibouti                         | Male   | 15000<br>(10900–20200)       | 5.80<br>(4.87–6.85)      | 2350<br>(1710–3170) |
| Eritrea                          | Both   | 56700<br>(40000–75800)       | 2.10<br>(1.66–2.56)      | 845<br>(596–1130)   |
| Eritrea                          | Female | 1440<br>(927–2130)           | 0.118<br>(0.0818–0.168)  | 43.1<br>(27.8–63.9) |
| Eritrea                          | Male   | 55200<br>(39000–73900)       | 3.72<br>(2.93–4.51)      | 1640<br>(1150–2190) |
| Ethiopia                         | Both   | 240000<br>(197000–290000)    | 0.631<br>(0.512–0.773)   | 223<br>(183–270)    |
| Ethiopia                         | Female | 16100<br>(11800–22100)       | 0.0933<br>(0.0678–0.126) | 30.2<br>(22.2–41.4) |
| Ethiopia                         | Male   | 223000<br>(182000–274000)    | 1.08<br>(0.870–1.32)     | 411<br>(334–504)    |
| Kenya                            | Both   | 329000<br>(273000–398000)    | 1.86<br>(1.54–2.21)      | 655<br>(543–792)    |

|                                |        |                           |                        |                     |
|--------------------------------|--------|---------------------------|------------------------|---------------------|
| Kenya                          | Female | 34100<br>(26300–44600)    | 0.413<br>(0.326–0.520) | 136<br>(104–177)    |
| Kenya                          | Male   | 295000<br>(239000–361000) | 3.13<br>(2.61–3.68)    | 1180<br>(955–1440)  |
| Madagascar                     | Both   | 194000<br>(148000–251000) | 1.81<br>(1.48–2.19)    | 728<br>(554–941)    |
| Madagascar                     | Female | 19600<br>(13500–27400)    | 0.380<br>(0.280–0.508) | 147<br>(101–205)    |
| Madagascar                     | Male   | 175000<br>(132000–226000) | 3.12<br>(2.57–3.76)    | 1310<br>(988–1690)  |
| Malawi                         | Both   | 144000<br>(113000–181000) | 1.92<br>(1.53–2.30)    | 779<br>(613–979)    |
| Malawi                         | Female | 15900<br>(11300–21800)    | 0.459<br>(0.336–0.616) | 168<br>(119–230)    |
| Malawi                         | Male   | 128000<br>(99900–161000)  | 3.18<br>(2.52–3.82)    | 1420<br>(1110–1790) |
| Mozambique                     | Both   | 265000<br>(203000–342000) | 1.55<br>(1.23–1.90)    | 899<br>(689–1160)   |
| Mozambique                     | Female | 32900<br>(22700–46900)    | 0.413<br>(0.294–0.558) | 215<br>(148–306)    |
| Mozambique                     | Male   | 233000<br>(179000–298000) | 2.53<br>(2.02–3.12)    | 1640<br>(1260–2100) |
| Rwanda                         | Both   | 135000<br>(109000–165000) | 3.16<br>(2.58–3.75)    | 1070<br>(856–1300)  |
| Rwanda                         | Female | 45200<br>(35700–56500)    | 2.17<br>(1.73–2.68)    | 694<br>(547–866)    |
| Rwanda                         | Male   | 90200<br>(72000–111000)   | 4.09<br>(3.33–4.93)    | 1460<br>(1170–1800) |
| Somalia                        | Both   | 183000<br>(132000–247000) | 1.40<br>(1.12–1.72)    | 900<br>(650–1210)   |
| Somalia                        | Female | 19000<br>(12100–28700)    | 0.319<br>(0.218–0.455) | 190<br>(122–288)    |
| Somalia                        | Male   | 164000<br>(118000–220000) | 2.31<br>(1.85–2.82)    | 1580<br>(1140–2120) |
| South Sudan                    | Both   | 59400<br>(43300–80100)    | 1.13<br>(0.871–1.44)   | 640<br>(467–863)    |
| South Sudan                    | Female | 5230<br>(3410–7530)       | 0.217<br>(0.147–0.299) | 113<br>(73.7–163)   |
| South Sudan                    | Male   | 54200<br>(39500–73100)    | 1.92<br>(1.47–2.45)    | 1160<br>(847–1570)  |
| Uganda                         | Both   | 194000<br>(154000–240000) | 1.14<br>(0.923–1.38)   | 472<br>(374–585)    |
| Uganda                         | Female | 33700<br>(25100–44400)    | 0.437<br>(0.332–0.564) | 161<br>(120–212)    |
| Uganda                         | Male   | 160000<br>(126000–200000) | 1.72<br>(1.39–2.11)    | 793<br>(625–990)    |
| United Republic of<br>Tanzania | Both   | 555000<br>(453000–678000) | 2.39<br>(1.99–2.80)    | 978<br>(799–1200)   |
| United Republic of<br>Tanzania | Female | 129000<br>(100000–162000) | 1.15<br>(0.914–1.40)   | 442<br>(344–555)    |
| United Republic of<br>Tanzania | Male   | 426000<br>(346000–520000) | 3.53<br>(2.91–4.18)    | 1540<br>(1260–1890) |
| Zambia                         | Both   | 140000<br>(107000–176000) | 1.76<br>(1.40–2.14)    | 770<br>(589–967)    |

|                             |        |                              |                        |                     |
|-----------------------------|--------|------------------------------|------------------------|---------------------|
| Zambia                      | Female | 23100<br>(17300–30500)       | 0.641<br>(0.472–0.825) | 251<br>(188–331)    |
| Zambia                      | Male   | 117000<br>(88100–148000)     | 2.68<br>(2.14–3.26)    | 1300<br>(978–1640)  |
| Southern Sub-Saharan Africa | Both   | 1440000<br>(1300000–1580000) | 3.78<br>(3.42–4.16)    | 1830<br>(1650–2010) |
| Southern Sub-Saharan Africa | Female | 299000<br>(262000–336000)    | 1.67<br>(1.48–1.89)    | 743<br>(651–834)    |
| Southern Sub-Saharan Africa | Male   | 1140000<br>(1030000–1260000) | 5.63<br>(5.08–6.20)    | 2970<br>(2680–3280) |
| Botswana                    | Both   | 49300<br>(36900–63400)       | 4.38<br>(3.63–5.10)    | 2110<br>(1580–2710) |
| Botswana                    | Female | 9380<br>(6610–13000)         | 1.80<br>(1.37–2.29)    | 789<br>(557–1090)   |
| Botswana                    | Male   | 39900<br>(30000–50600)       | 6.59<br>(5.50–7.67)    | 3470<br>(2610–4400) |
| Eswatini                    | Both   | 10800<br>(8100–14200)        | 1.69<br>(1.40–2.01)    | 945<br>(709–1240)   |
| Eswatini                    | Female | 1770<br>(1130–2580)          | 0.638<br>(0.444–0.856) | 303<br>(194–442)    |
| Eswatini                    | Male   | 9020<br>(6880–11700)         | 2.50<br>(2.06–2.96)    | 1620<br>(1230–2100) |
| Lesotho                     | Both   | 72700<br>(56200–90400)       | 4.41<br>(3.71–5.12)    | 3480<br>(2690–4320) |
| Lesotho                     | Female | 5650<br>(3660–8380)          | 0.759<br>(0.537–1.06)  | 533<br>(346–791)    |
| Lesotho                     | Male   | 67100<br>(52200–83500)       | 7.40<br>(6.24–8.64)    | 6490<br>(5050–8080) |
| Namibia                     | Both   | 29400<br>(23500–36600)       | 3.01<br>(2.65–3.38)    | 1220<br>(977–1520)  |
| Namibia                     | Female | 9230<br>(6910–12300)         | 2.08<br>(1.71–2.51)    | 745<br>(557–990)    |
| Namibia                     | Male   | 20200<br>(16100–24900)       | 3.77<br>(3.31–4.28)    | 1740<br>(1390–2140) |
| South Africa                | Both   | 1010000<br>(916000–1100000)  | 3.80<br>(3.41–4.20)    | 1810<br>(1650–1980) |
| South Africa                | Female | 236000<br>(205000–268000)    | 1.89<br>(1.65–2.15)    | 831<br>(722–945)    |
| South Africa                | Male   | 773000<br>(693000–853000)    | 5.49<br>(4.85–6.09)    | 2840<br>(2550–3130) |
| Zimbabwe                    | Both   | 269000<br>(213000–327000)    | 3.74<br>(3.10–4.39)    | 1790<br>(1420–2180) |
| Zimbabwe                    | Female | 37500<br>(27200–50400)       | 1.10<br>(0.832–1.40)   | 480<br>(348–646)    |
| Zimbabwe                    | Male   | 231000<br>(185000–281000)    | 6.11<br>(5.08–7.11)    | 3210<br>(2560–3890) |
| Western Sub-Saharan Africa  | Both   | 2010000<br>(1690000–2380000) | 0.826<br>(0.697–0.956) | 440<br>(371–521)    |
| Western Sub-Saharan Africa  | Female | 247000<br>(198000–306000)    | 0.214<br>(0.176–0.260) | 106<br>(85.0–131)   |
| Western Sub-Saharan Africa  | Male   | 1760000<br>(1470000–2080000) | 1.38<br>(1.16–1.60)    | 790<br>(661–935)    |
| Benin                       | Both   | 58000<br>(44600–74700)       | 0.888<br>(0.742–1.03)  | 458<br>(352–590)    |

|               |        |                           |                         |                     |
|---------------|--------|---------------------------|-------------------------|---------------------|
| Benin         | Female | 8070<br>(5500–11000)      | 0.266<br>(0.197–0.342)  | 125<br>(85.4–171)   |
| Benin         | Male   | 49900<br>(38600–64100)    | 1.43<br>(1.20–1.64)     | 802<br>(620–1030)   |
| Burkina Faso  | Both   | 104000<br>(82000–132000)  | 0.729<br>(0.567–0.910)  | 460<br>(361–581)    |
| Burkina Faso  | Female | 6860<br>(4840–9660)       | 0.101<br>(0.0704–0.139) | 58.9<br>(41.5–82.9) |
| Burkina Faso  | Male   | 97600<br>(76500–123000)   | 1.29<br>(1.00–1.63)     | 885<br>(693–1110)   |
| Cabo Verde    | Both   | 4430<br>(3830–5090)       | 2.99<br>(2.64–3.34)     | 786<br>(679–904)    |
| Cabo Verde    | Female | 677<br>(545–836)          | 1.05<br>(0.848–1.31)    | 242<br>(195–299)    |
| Cabo Verde    | Male   | 3750<br>(3240–4310)       | 4.47<br>(3.97–4.97)     | 1320<br>(1140–1520) |
| Cameroon      | Both   | 178000<br>(137000–231000) | 1.31<br>(1.10–1.56)     | 612<br>(471–795)    |
| Cameroon      | Female | 10600<br>(7320–15200)     | 0.166<br>(0.120–0.222)  | 72.8<br>(50.1–104)  |
| Cameroon      | Male   | 167000<br>(129000–217000) | 2.34<br>(1.95–2.80)     | 1160<br>(890–1500)  |
| Chad          | Both   | 92700<br>(70700–119000)   | 0.802<br>(0.620–1.02)   | 565<br>(431–725)    |
| Chad          | Female | 10500<br>(7300–14500)     | 0.195<br>(0.136–0.271)  | 127<br>(88.3–176)   |
| Chad          | Male   | 82200<br>(63000–105000)   | 1.34<br>(1.02–1.71)     | 1010<br>(774–1280)  |
| Côte d'Ivoire | Both   | 226000<br>(172000–285000) | 1.82<br>(1.44–2.20)     | 862<br>(659–1090)   |
| Côte d'Ivoire | Female | 26200<br>(18600–35300)    | 0.473<br>(0.346–0.621)  | 207<br>(147–279)    |
| Côte d'Ivoire | Male   | 199000<br>(152000–254000) | 2.90<br>(2.30–3.51)     | 1480<br>(1120–1880) |
| Gambia        | Both   | 19100<br>(14900–23700)    | 2.40<br>(1.89–2.87)     | 852<br>(662–1060)   |
| Gambia        | Female | 881<br>(633–1210)         | 0.232<br>(0.169–0.316)  | 77.2<br>(55.5–106)  |
| Gambia        | Male   | 18300<br>(14100–22600)    | 4.39<br>(3.44–5.25)     | 1650<br>(1280–2040) |
| Ghana         | Both   | 165000<br>(133000–202000) | 1.34<br>(1.11–1.61)     | 522<br>(423–641)    |
| Ghana         | Female | 24700<br>(18600–32800)    | 0.424<br>(0.316–0.549)  | 152<br>(115–202)    |
| Ghana         | Male   | 140000<br>(112000–172000) | 2.17<br>(1.79–2.60)     | 914<br>(734–1130)   |
| Guinea        | Both   | 128000<br>(102000–159000) | 1.72<br>(1.51–1.94)     | 1010<br>(805–1260)  |
| Guinea        | Female | 10800<br>(7520–15200)     | 0.304<br>(0.222–0.404)  | 166<br>(115–233)    |
| Guinea        | Male   | 117000<br>(92300–146000)  | 3.01<br>(2.65–3.39)     | 1920<br>(1510–2390) |
| Guinea-Bissau | Both   | 10100<br>(7990–12600)     | 1.06<br>(0.911–1.22)    | 533<br>(420–663)    |

|                       |        |                           |                          |                     |
|-----------------------|--------|---------------------------|--------------------------|---------------------|
| Guinea-Bissau         | Female | 1020<br>(710–1410)        | 0.231<br>(0.170–0.303)   | 104<br>(72.7–144)   |
| Guinea-Bissau         | Male   | 9120<br>(7180–11300)      | 1.78<br>(1.52–2.04)      | 987<br>(777–1220)   |
| Liberia               | Both   | 22300<br>(16900–28800)    | 1.13<br>(0.867–1.42)     | 466<br>(353–602)    |
| Liberia               | Female | 3190<br>(2240–4400)       | 0.335<br>(0.241–0.448)   | 134<br>(94.1–185)   |
| Liberia               | Male   | 19100<br>(14400–24800)    | 1.87<br>(1.43–2.37)      | 793<br>(598–1030)   |
| Mali                  | Both   | 109000<br>(86500–138000)  | 0.731<br>(0.637–0.833)   | 495<br>(394–630)    |
| Mali                  | Female | 12900<br>(9130–17300)     | 0.185<br>(0.139–0.240)   | 117<br>(82.8–157)   |
| Mali                  | Male   | 95700<br>(75400–122000)   | 1.22<br>(1.05–1.40)      | 879<br>(693–1120)   |
| Mauritania            | Both   | 23700<br>(17700–30200)    | 1.91<br>(1.51–2.23)      | 589<br>(440–751)    |
| Mauritania            | Female | 5110<br>(3560–6960)       | 0.832<br>(0.624–1.06)    | 250<br>(174–341)    |
| Mauritania            | Male   | 18500<br>(13900–23700)    | 2.97<br>(2.34–3.50)      | 940<br>(706–1200)   |
| Niger                 | Both   | 67100<br>(50700–86000)    | 0.432<br>(0.356–0.503)   | 288<br>(218–369)    |
| Niger                 | Female | 6900<br>(4820–9770)       | 0.0932<br>(0.0671–0.125) | 58.8<br>(41.1–83.3) |
| Niger                 | Male   | 60200<br>(45400–77600)    | 0.742<br>(0.608–0.863)   | 520<br>(392–671)    |
| Nigeria               | Both   | 556000<br>(422000–724000) | 0.480<br>(0.360–0.634)   | 259<br>(197–337)    |
| Nigeria               | Female | 86500<br>(59600–126000)   | 0.156<br>(0.107–0.218)   | 77.5<br>(53.5–113)  |
| Nigeria               | Male   | 469000<br>(348000–638000) | 0.777<br>(0.570–1.04)    | 455<br>(337–618)    |
| São Tomé and Príncipe | Both   | 1270<br>(1030–1520)       | 2.37<br>(2.07–2.65)      | 619<br>(500–741)    |
| São Tomé and Príncipe | Female | 178<br>(132–235)          | 0.693<br>(0.531–0.892)   | 173<br>(129–229)    |
| São Tomé and Príncipe | Male   | 1090<br>(880–1310)        | 3.89<br>(3.40–4.39)      | 1060<br>(854–1270)  |
| Senegal               | Both   | 99700<br>(77700–124000)   | 1.82<br>(1.45–2.18)      | 659<br>(513–821)    |
| Senegal               | Female | 7130<br>(4810–9990)       | 0.274<br>(0.186–0.378)   | 94.5<br>(63.7–132)  |
| Senegal               | Male   | 92600<br>(72100–116000)   | 3.23<br>(2.56–3.88)      | 1220<br>(951–1520)  |
| Sierra Leone          | Both   | 72600<br>(55800–93600)    | 1.53<br>(1.27–1.79)      | 876<br>(674–1130)   |
| Sierra Leone          | Female | 13400<br>(9780–18400)     | 0.594<br>(0.462–0.747)   | 320<br>(234–440)    |
| Sierra Leone          | Male   | 59200<br>(45500–76000)    | 2.38<br>(1.96–2.78)      | 1440<br>(1110–1850) |
| Togo                  | Both   | 72100<br>(56300–91400)    | 2.10<br>(1.72–2.51)      | 910<br>(711–1150)   |

|      |        |                        |                        |                     |
|------|--------|------------------------|------------------------|---------------------|
| Togo | Female | 11400<br>(8280–15400)  | 0.712<br>(0.518–0.939) | 283<br>(205–380)    |
| Togo | Male   | 60600<br>(46700–77900) | 3.33<br>(2.70–3.97)    | 1560<br>(1210–2010) |

**Supplemental Table S7.** Ratio of smoking attributable years of life lost (YLLs) to years lived with disability (YLDs), by location for 2019.

| <b>Location</b>                                         | <b>YLL to YLD Ratio</b>     |
|---------------------------------------------------------|-----------------------------|
| <b>Global</b>                                           | <b>5·42<br/>(4·17–7·15)</b> |
| <b>Central Europe, Eastern Europe, and Central Asia</b> | <b>6·75<br/>(5·04–9·22)</b> |
| Central Asia                                            | 8·74<br>(6·48–12·1)         |
| Armenia                                                 | 7·51<br>(5·34–10·4)         |
| Azerbaijan                                              | 8·99<br>(6·25–12·8)         |
| Georgia                                                 | 8·19<br>(5·91–11·2)         |
| Kazakhstan                                              | 7·36<br>(5·37–10·2)         |
| Kyrgyzstan                                              | 7·25<br>(5·28–10·2)         |
| Mongolia                                                | 11·8<br>(7·98–17·3)         |
| Tajikistan                                              | 9·13<br>(6·19–13·2)         |
| Turkmenistan                                            | 9·20<br>(6·26–13·3)         |
| Uzbekistan                                              | 10·5<br>(7·48–14·9)         |
| Central Europe                                          | 4·77<br>(3·49–6·51)         |
| Albania                                                 | 4·65<br>(3·03–6·92)         |
| Bosnia and Herzegovina                                  | 4·63<br>(3·18–6·72)         |
| Bulgaria                                                | 6·16<br>(4·27–8·88)         |
| Croatia                                                 | 3·98<br>(2·75–5·74)         |
| Czechia                                                 | 3·56<br>(2·53–5·01)         |
| Hungary                                                 | 5·05<br>(3·60–7·06)         |
| Montenegro                                              | 5·77<br>(4·07–8·20)         |
| North Macedonia                                         | 5·55<br>(3·79–8·10)         |
| Poland                                                  | 4·49<br>(3·23–6·26)         |
| Romania                                                 | 5·55<br>(4·04–7·85)         |

|                           |                                   |
|---------------------------|-----------------------------------|
| Serbia                    | 5·16<br>(3·55–7·34)               |
| Slovakia                  | 4·55<br>(3·09–6·52)               |
| Slovenia                  | 3·22<br>(2·21–4·64)               |
| Eastern Europe            | 8·01<br>(5·86–11·1)               |
| Belarus                   | 7·90<br>(5·50–11·3)               |
| Estonia                   | 4·64<br>(3·23–6·85)               |
| Latvia                    | 5·97<br>(4·27–8·44)               |
| Lithuania                 | 6·15<br>(4·38–8·68)               |
| Republic of Moldova       | 7·43<br>(5·39–10·3)               |
| Russian Federation        | 7·60<br>(5·50–10·7)               |
| Ukraine                   | 9·73<br>(7·00–13·8)               |
| <b>High-income</b>        | <b>3·14</b><br><b>(2·44–4·13)</b> |
| Australasia               | 2·68<br>(2·05–3·55)               |
| Australia                 | 2·58<br>(1·96–3·43)               |
| New Zealand               | 3·24<br>(2·48–4·27)               |
| High-income Asia Pacific  | 3·11<br>(2·34–4·18)               |
| Brunei Darussalam         | 4·39<br>(3·16–6·07)               |
| Japan                     | 3·12<br>(2·35–4·18)               |
| Republic of Korea         | 3·07<br>(2·28–4·14)               |
| Singapore                 | 2·99<br>(2·23–4·04)               |
| High-income North America | 2·98<br>(2·37–3·87)               |
| Canada                    | 3·48<br>(2·67–4·65)               |
| Greenland                 | 5·48<br>(3·91–7·60)               |
| United States of America  | 2·94<br>(2·34–3·81)               |
| Southern Latin America    | 4·71<br>(3·54–6·32)               |
| Argentina                 | 5·32<br>(4·02–7·16)               |
| Chile                     | 3·00<br>(2·22–4·10)               |



|                                    |                             |
|------------------------------------|-----------------------------|
| Uruguay                            | 5-58<br>(4-19-7-46)         |
| Western Europe                     | 3-21<br>(2-45-4-26)         |
| Andorra                            | 3-15<br>(2-17-4-56)         |
| Austria                            | 3-15<br>(2-38-4-27)         |
| Belgium                            | 3-39<br>(2-59-4-47)         |
| Cyprus                             | 2-89<br>(2-14-3-92)         |
| Denmark                            | 3-50<br>(2-68-4-62)         |
| Finland                            | 3-20<br>(2-40-4-29)         |
| France                             | 3-44<br>(2-54-4-65)         |
| Germany                            | 3-15<br>(2-41-4-21)         |
| Greece                             | 3-85<br>(2-97-5-05)         |
| Iceland                            | 2-78<br>(2-07-3-82)         |
| Ireland                            | 2-88<br>(2-18-3-87)         |
| Israel                             | 2-77<br>(2-07-3-80)         |
| Italy                              | 3-04<br>(2-30-4-03)         |
| Luxembourg                         | 2-57<br>(1-91-3-52)         |
| Malta                              | 3-03<br>(2-23-4-22)         |
| Monaco                             | 4-84<br>(3-46-6-58)         |
| Netherlands                        | 3-37<br>(2-66-4-36)         |
| Norway                             | 2-66<br>(2-04-3-52)         |
| Portugal                           | 3-18<br>(2-36-4-32)         |
| San Marino                         | 3-13<br>(1-89-5-02)         |
| Spain                              | 3-30<br>(2-50-4-38)         |
| Sweden                             | 2-73<br>(2-09-3-61)         |
| Switzerland                        | 2-43<br>(1-83-3-26)         |
| United Kingdom                     | 3-25<br>(2-50-4-32)         |
| <b>Latin America and Caribbean</b> | <b>5-14<br/>(3-83-7-04)</b> |

|                                  |                     |
|----------------------------------|---------------------|
|                                  | 4-97<br>(3-44-7-27) |
| Andean Latin America             |                     |
| Bolivia (Plurinational State of) | 7-19<br>(4-74-10-6) |
| Ecuador                          | 5-18<br>(3-51-7-67) |
| Peru                             | 3-82<br>(2-46-5-73) |
| Caribbean                        | 6-17<br>(4-49-8-47) |
| Antigua and Barbuda              | 4-63<br>(3-25-6-60) |
| Bahamas                          | 6-48<br>(4-44-9-35) |
| Barbados                         | 5-11<br>(3-51-7-36) |
| Belize                           | 5-80<br>(4-14-8-17) |
| Bermuda                          | 5-03<br>(3-59-7-20) |
| Cuba                             | 5-73<br>(4-06-8-10) |
| Dominica                         | 5-63<br>(3-89-8-06) |
| Dominican Republic               | 8-54<br>(5-83-12-5) |
| Grenada                          | 6-38<br>(4-65-8-81) |
| Guyana                           | 8-74<br>(5-82-12-7) |
| Haiti                            | 9-13<br>(5-75-14-0) |
| Jamaica                          | 5-27<br>(3-60-7-60) |
| Puerto Rico                      | 3-56<br>(2-42-5-18) |
| Saint Kitts and Nevis            | 6-32<br>(4-34-8-95) |
| Saint Lucia                      | 5-03<br>(3-58-7-04) |
| Saint Vincent and the Grenadines | 5-92<br>(4-23-8-35) |
| Suriname                         | 5-99<br>(4-17-8-54) |
| Trinidad and Tobago              | 5-31<br>(3-41-7-88) |
| United States Virgin Islands     | 8-14<br>(5-90-11-4) |
| Central Latin America            | 4-62<br>(3-35-6-57) |
| Colombia                         | 3-67<br>(2-45-5-34) |
| Costa Rica                       | 3-72<br>(2-51-5-39) |

|                                     |                             |
|-------------------------------------|-----------------------------|
| El Salvador                         | 4-78<br>(3-18-6-96)         |
| Guatemala                           | 5-02<br>(3-37-7-39)         |
| Honduras                            | 6-95<br>(4-96-9-77)         |
| Mexico                              | 4-48<br>(3-23-6-36)         |
| Nicaragua                           | 4-56<br>(3-13-6-54)         |
| Panama                              | 4-03<br>(2-71-5-87)         |
| Venezuela (Bolivarian Republic of)  | 6-23<br>(4-16-9-18)         |
| Tropical Latin America              | 5-27<br>(3-95-7-12)         |
| Brazil                              | 5-26<br>(3-96-7-13)         |
| Paraguay                            | 5-40<br>(3-58-7-92)         |
| <b>North Africa and Middle East</b> | <b>4-98<br/>(3-63-6-89)</b> |
| North Africa and Middle East        | 4-98<br>(3-63-6-89)         |
| Afghanistan                         | 8-92<br>(5-88-13-2)         |
| Algeria                             | 4-10<br>(2-93-5-90)         |
| Bahrain                             | 2-57<br>(1-77-3-74)         |
| Egypt                               | 6-72<br>(4-50-10-0)         |
| Iran (Islamic Republic of)          | 3-75<br>(2-80-5-09)         |
| Iraq                                | 6-41<br>(4-32-9-44)         |
| Jordan                              | 3-13<br>(2-21-4-49)         |
| Kuwait                              | 2-77<br>(1-94-4-02)         |
| Lebanon                             | 4-68<br>(3-46-6-33)         |
| Libya                               | 4-27<br>(2-97-6-12)         |
| Morocco                             | 6-26<br>(4-16-8-98)         |
| Oman                                | 3-35<br>(2-31-4-89)         |
| Palestine                           | 5-22<br>(3-74-7-30)         |
| Qatar                               | 1-59<br>(1-03-2-44)         |
| Saudi Arabia                        | 4-43<br>(2-97-6-53)         |

|                                               |                                   |
|-----------------------------------------------|-----------------------------------|
| Sudan                                         | 6-58<br>(4-24-9-98)               |
| Syrian Arab Republic                          | 6-55<br>(4-37-9-58)               |
| Tunisia                                       | 4-57<br>(3-01-6-83)               |
| Turkey                                        | 3-94<br>(2-78-5-60)               |
| United Arab Emirates                          | 3-43<br>(2-24-5-21)               |
| Yemen                                         | 7-51<br>(5-07-11-0)               |
| <b>South Asia</b>                             | <b>7-00</b><br><b>(5-43-9-08)</b> |
| South Asia                                    | 7-00<br>(5-43-9-08)               |
| Bangladesh                                    | 5-76<br>(4-19-7-94)               |
| Bhutan                                        | 5-54<br>(4-04-7-69)               |
| India                                         | 7-01<br>(5-36-9-27)               |
| Nepal                                         | 6-60<br>(4-94-8-87)               |
| Pakistan                                      | 8-35<br>(6-01-11-8)               |
| <b>Southeast Asia, East Asia, and Oceania</b> | <b>6-47</b><br><b>(4-85-8-69)</b> |
| East Asia                                     | 6-71<br>(4-88-9-14)               |
| China                                         | 6-71<br>(4-85-9-16)               |
| Democratic People's Republic of Korea         | 8-00<br>(5-94-10-7)               |
| Taiwan (Province of China)                    | 5-09<br>(3-47-7-31)               |
| Oceania                                       | 7-58<br>(5-29-10-8)               |
| American Samoa                                | 4-85<br>(3-45-6-75)               |
| Cook Islands                                  | 3-93<br>(2-86-5-38)               |
| Fiji                                          | 7-43<br>(5-00-10-8)               |
| Guam                                          | 5-52<br>(3-90-7-74)               |
| Kiribati                                      | 11-1<br>(7-66-16-1)               |
| Marshall Islands                              | 8-89<br>(6-00-12-9)               |
| Micronesia (Federated States of)              | 10-0<br>(6-47-15-1)               |
| Nauru                                         | 9-54<br>(6-95-13-5)               |

|                                  |                                   |
|----------------------------------|-----------------------------------|
| Niue                             | 5-84<br>(4-22-8-09)               |
| Northern Mariana Islands         | 6-66<br>(4-83-9-23)               |
| Palau                            | 8-05<br>(5-66-11-7)               |
| Papua New Guinea                 | 6-96<br>(4-69-10-1)               |
| Samoa                            | 6-87<br>(4-82-9-85)               |
| Solomon Islands                  | 16-1<br>(11-2-22-7)               |
| Tokelau                          | 5-29<br>(3-70-7-59)               |
| Tonga                            | 6-19<br>(4-32-8-82)               |
| Tuvalu                           | 7-68<br>(5-27-11-0)               |
| Vanuatu                          | 10-6<br>(7-16-15-5)               |
| Southeast Asia                   | 5-79<br>(4-36-7-72)               |
| Cambodia                         | 6-78<br>(4-91-9-29)               |
| Indonesia                        | 5-94<br>(4-31-8-37)               |
| Lao People's Democratic Republic | 7-12<br>(5-12-9-92)               |
| Malaysia                         | 5-78<br>(4-03-8-15)               |
| Maldives                         | 2-86<br>(2-11-3-90)               |
| Mauritius                        | 4-13<br>(2-90-5-77)               |
| Myanmar                          | 6-45<br>(4-95-8-70)               |
| Philippines                      | 5-94<br>(4-17-8-34)               |
| Seychelles                       | 5-36<br>(3-97-7-32)               |
| Sri Lanka                        | 3-79<br>(2-58-5-48)               |
| Thailand                         | 4-21<br>(2-82-6-11)               |
| Timor-Leste                      | 6-55<br>(4-49-9-23)               |
| Viet Nam                         | 6-35<br>(4-56-8-73)               |
| <b>Sub-Saharan Africa</b>        | <b>6-89</b><br><b>(5-11-9-37)</b> |
| Central Sub-Saharan Africa       | 8-19<br>(5-79-11-6)               |
| Angola                           | 7-83<br>(5-53-11-2)               |

|                                  |                     |
|----------------------------------|---------------------|
| Central African Republic         | 15-5<br>(10-6-22-7) |
| Congo                            | 7-24<br>(5-03-10-3) |
| Democratic Republic of the Congo | 8-00<br>(5-47-11-5) |
| Equatorial Guinea                | 5-31<br>(3-28-8-05) |
| Gabon                            | 7-21<br>(5-03-10-1) |
| Eastern Sub-Saharan Africa       | 7-16<br>(5-25-9-87) |
| Burundi                          | 8-89<br>(6-04-12-7) |
| Comoros                          | 6-00<br>(4-12-8-54) |
| Djibouti                         | 6-62<br>(4-31-9-76) |
| Eritrea                          | 9-67<br>(6-26-14-6) |
| Ethiopia                         | 6-21<br>(4-31-8-82) |
| Kenya                            | 6-05<br>(4-24-8-45) |
| Madagascar                       | 7-10<br>(4-67-10-4) |
| Malawi                           | 8-03<br>(5-65-11-4) |
| Mozambique                       | 9-62<br>(6-55-13-9) |
| Rwanda                           | 6-41<br>(4-70-8-91) |
| Somalia                          | 11-5<br>(7-56-16-9) |
| South Sudan                      | 6-18<br>(4-00-9-17) |
| Uganda                           | 7-12<br>(5-03-10-1) |
| United Republic of Tanzania      | 6-19<br>(4-43-8-81) |
| Zambia                           | 8-35<br>(5-77-12-1) |
| Southern Sub-Saharan Africa      | 6-95<br>(5-39-9-10) |
| Botswana                         | 8-70<br>(5-86-12-7) |
| Eswatini                         | 10-3<br>(7-26-14-6) |
| Lesotho                          | 15-6<br>(11-0-21-9) |
| Namibia                          | 6-97<br>(4-97-9-74) |
| South Africa                     | 5-99<br>(4-69-7-83) |

|                            |                     |
|----------------------------|---------------------|
| Zimbabwe                   | 10-8<br>(7-67-14-7) |
| Western Sub-Saharan Africa | 6-08<br>(4-43-8-47) |
| Benin                      | 6-27<br>(4-26-9-05) |
| Burkina Faso               | 7-10<br>(4-93-10-2) |
| Cabo Verde                 | 6-45<br>(4-70-8-90) |
| Cameroon                   | 6-75<br>(4-57-9-97) |
| Chad                       | 7-37<br>(5-08-10-5) |
| Côte d'Ivoire              | 6-47<br>(4-35-9-42) |
| Gambia                     | 7-16<br>(4-96-10-3) |
| Ghana                      | 7-80<br>(5-61-11-0) |
| Guinea                     | 7-74<br>(5-38-11-0) |
| Guinea-Bissau              | 10-4<br>(7-17-14-6) |
| Liberia                    | 5-56<br>(3-73-8-06) |
| Mali                       | 5-50<br>(3-85-7-81) |
| Mauritania                 | 4-06<br>(2-63-5-97) |
| Niger                      | 6-14<br>(3-99-8-85) |
| Nigeria                    | 4-87<br>(3-22-7-11) |
| São Tomé and Príncipe      | 5-92<br>(4-41-8-01) |
| Senegal                    | 5-96<br>(4-09-8-50) |
| Sierra Leone               | 6-53<br>(4-38-9-56) |
| Togo                       | 7-64<br>(5-25-10-9) |

**Supplemental Figure S2.** Ratio of smoking attributable years of life lost (YLLs) to years lived with disability (YLDs), by location and Socio-demographic Index level, in 1990 and 2019. Size of the point corresponds to the smoking-attributable disability-adjusted life-year rate. Colors correspond to the geographic region of the location.

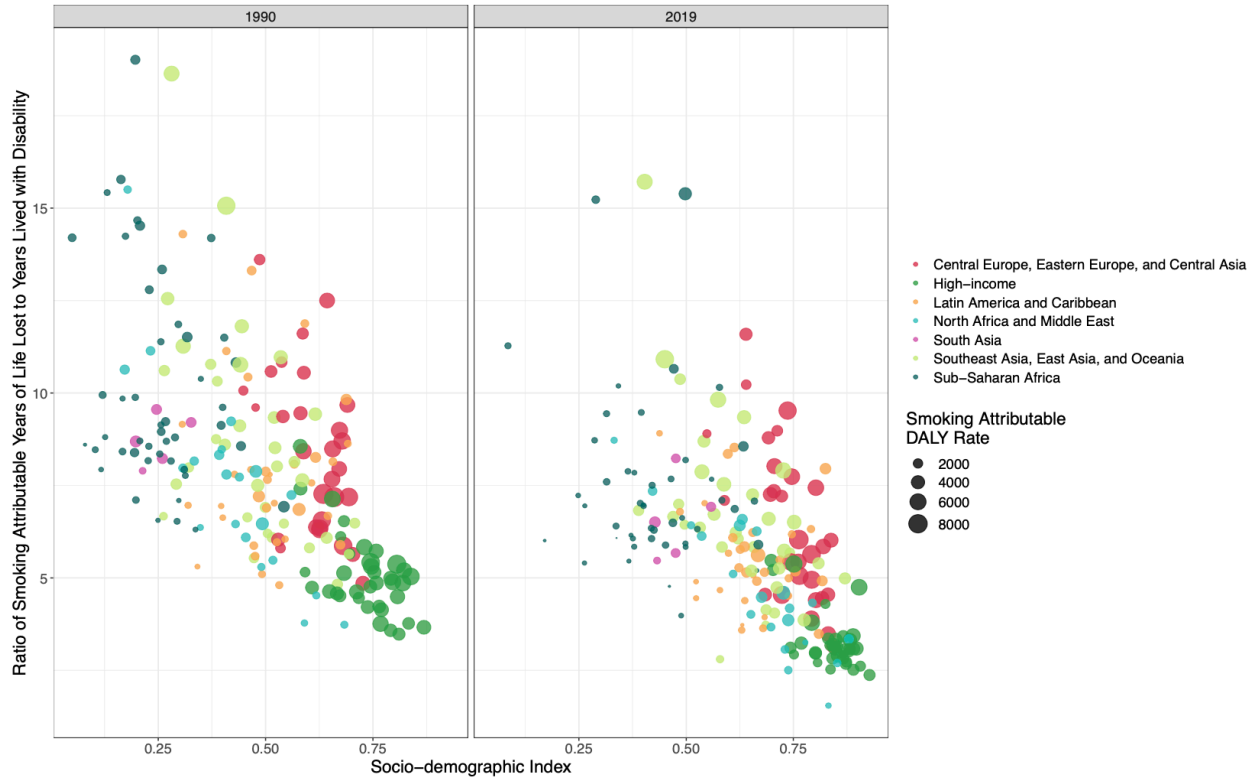



**Supplemental Table S8.** Number of smoking attributable deaths for all causes and the top four causes of death (chronic obstructive pulmonary disease, ischaemic heart disease, stroke, and lung cancer), by region, in 2019.

| Location                                                | All causes                          | Chronic obstructive pulmonary disease | Ischaemic heart disease             | Stroke                            | Tracheal, bronchus, and lung cancer |
|---------------------------------------------------------|-------------------------------------|---------------------------------------|-------------------------------------|-----------------------------------|-------------------------------------|
| <b>Global</b>                                           | <b>7690000</b><br>(7160000–8200000) | <b>1590000</b><br>(1410000–1760000)   | <b>1680000</b><br>(1560000–1810000) | <b>931000</b><br>(833000–1030000) | <b>1310000</b><br>(1200000–1430000) |
| <b>Central Europe, Eastern Europe, and Central Asia</b> | <b>775000</b><br>(712000–841000)    | <b>57500</b><br>(51400–64500)         | <b>295000</b><br>(269000–325000)    | <b>106000</b><br>(95000–117000)   | <b>126000</b><br>(114000–138000)    |
| Central Asia                                            | 84400<br>(77000–92500)              | 7610<br>(6680–8660)                   | 37100<br>(33300–41200)              | 13400<br>(11900–15000)            | 8870<br>(7910–9910)                 |
| Central Europe                                          | 248000<br>(218000–282000)           | 22300<br>(19200–25700)                | 65400<br>(56500–74500)              | 29600<br>(25500–34400)            | 60500<br>(52800–69000)              |
| Eastern Europe                                          | 442000<br>(391000–495000)           | 27700<br>(23700–32300)                | 193000<br>(170000–217000)           | 62800<br>(54900–71900)            | 56600<br>(49300–64300)              |
| <b>High-income</b>                                      | <b>1590000</b><br>(1530000–1660000) | <b>268000</b><br>(231000–303000)      | <b>254000</b><br>(234000–272000)    | <b>84900</b><br>(76700–93600)     | <b>440000</b><br>(410000–461000)    |
| Australasia                                             | 23800<br>(22500–25300)              | 4590<br>(3810–5410)                   | 3710<br>(3340–4000)                 | 1060<br>(919–1200)                | 6850<br>(6220–7370)                 |
| High-income Asia Pacific                                | 254000<br>(238000–274000)           | 24700<br>(18900–31000)                | 23400<br>(21100–25400)              | 17100<br>(15300–19100)            | 72500<br>(64100–78000)              |
| High-income North America                               | 578000<br>(554000–603000)           | 118000<br>(97900–133000)              | 115000<br>(106000–124000)           | 26200<br>(23500–29100)            | 164000<br>(153000–172000)           |
| Southern Latin America                                  | 67400<br>(63700–71300)              | 10800<br>(9340–12300)                 | 11800<br>(10900–12700)              | 5700<br>(5120–6290)               | 12700<br>(11900–13500)              |
| Western Europe                                          | 667000<br>(640000–698000)           | 110000<br>(95800–124000)              | 101000<br>(92000–108000)            | 34800<br>(31200–38800)            | 184000<br>(173000–193000)           |
| <b>Latin America and Caribbean</b>                      | <b>324000</b><br>(300000–352000)    | <b>63700</b><br>(55500–72400)         | <b>73900</b><br>(66900–81400)       | <b>30200</b><br>(26800–33800)     | <b>42500</b><br>(38600–46500)       |
| Andean Latin America                                    | 12800<br>(10600–15300)              | 2030<br>(1570–2560)                   | 2470<br>(1980–2990)                 | 1000<br>(781–1280)                | 1630<br>(1270–2020)                 |
| Caribbean                                               | 40000<br>(34500–46600)              | 4860<br>(4000–5710)                   | 10700<br>(9050–12500)               | 4320<br>(3610–5110)               | 6920<br>(5850–8060)                 |
| Central Latin America                                   | 97100<br>(83900–113000)             | 22800<br>(18800–27300)                | 24500<br>(20700–28900)              | 6820<br>(5590–8170)               | 11400<br>(9520–13400)               |
| Tropical Latin America                                  | 175000<br>(164000–185000)           | 34000<br>(29800–38500)                | 36300<br>(33300–39300)              | 18100<br>(16100–20200)            | 22600<br>(20900–24200)              |
| <b>North Africa and Middle East</b>                     | <b>374000</b><br>(336000–417000)    | <b>42200</b><br>(34900–48800)         | <b>159000</b><br>(138000–186000)    | <b>37900</b><br>(32800–43500)     | <b>47800</b><br>(41900–54500)       |
| North Africa and Middle East                            | 374000<br>(336000–417000)           | 42200<br>(34900–48800)                | 159000<br>(138000–186000)           | 37900<br>(32800–43500)            | 47800<br>(41900–54500)              |
| <b>South Asia</b>                                       | <b>1290000</b><br>(1120000–1480000) | <b>457000</b><br>(358000–544000)      | <b>304000</b><br>(260000–352000)    | <b>114000</b><br>(97600–132000)   | <b>58400</b><br>(48500–68500)       |
| South Asia                                              | 1290000<br>(1120000–1480000)        | 457000<br>(358000–544000)             | 304000<br>(260000–352000)           | 114000<br>(97600–132000)          | 58400<br>(48500–68500)              |
| <b>Southeast Asia, East Asia, and Oceania</b>           | <b>3120000</b><br>(2740000–3550000) | <b>672000</b><br>(573000–781000)      | <b>558000</b><br>(485000–641000)    | <b>530000</b><br>(452000–616000)  | <b>581000</b><br>(483000–686000)    |
| East Asia                                               | 2490000<br>(2100000–2930000)        | 565000<br>(470000–676000)             | 422000<br>(354000–502000)           | 410000<br>(338000–492000)         | 504000<br>(411000–605000)           |
| Oceania                                                 | 11000<br>(8920–13700)               | 2560<br>(1920–3370)                   | 3390<br>(2620–4400)                 | 1500<br>(1100–1970)               | 766<br>(567–1100)                   |

|                             |                                         |                                      |                                      |                                      |                                      |
|-----------------------------|-----------------------------------------|--------------------------------------|--------------------------------------|--------------------------------------|--------------------------------------|
| Southeast Asia              | 623000<br>(560000–689000)               | 104000<br>(87600–118000)             | 132000<br>(116000–149000)            | 119000<br>(104000–<br>135000)        | 76400<br>(64900–88400)               |
| <b>Sub-Saharan Africa</b>   | <b>220000</b><br><b>(192000–251000)</b> | <b>29000</b><br><b>(24100–34100)</b> | <b>37400</b><br><b>(31200–44900)</b> | <b>27800</b><br><b>(23000–33200)</b> | <b>16500</b><br><b>(14300–19100)</b> |
| Central Sub-Saharan Africa  | 27400<br>(21800–34200)                  | 3560<br>(2400–4810)                  | 4450<br>(3340–5830)                  | 3250<br>(2490–4220)                  | 2270<br>(1440–4070)                  |
| Eastern Sub-Saharan Africa  | 82600<br>(71800–95400)                  | 10800<br>(8670–13200)                | 12900<br>(10200–16100)               | 11800<br>(9400–14500)                | 3810<br>(3080–4830)                  |
| Southern Sub-Saharan Africa | 47000<br>(42700–51300)                  | 6670<br>(5840–7450)                  | 7120<br>(6310–7940)                  | 4210<br>(3710–4780)                  | 5630<br>(5030–6390)                  |
| Western Sub-Saharan Africa  | 62600<br>(52400–74100)                  | 7930<br>(6210–9790)                  | 12900<br>(10400–15600)               | 8510<br>(6820–10400)                 | 4830<br>(3920–5860)                  |

Supplemental Figure S3. Global smoking attributable deaths (number, percent, rate per 100,000) by five-year age group for both sexes combined in 2019.

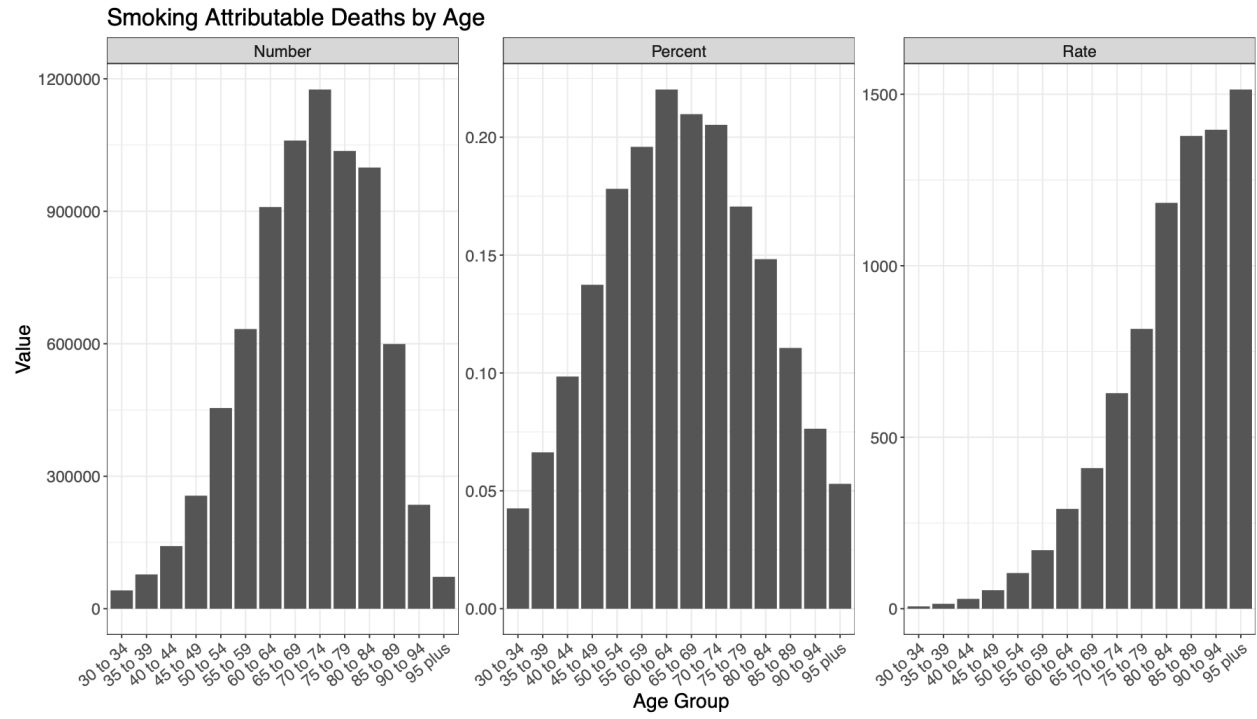

Supplemental Table S9. Percent change in number and share of all-age all-cause deaths attributable to smoking tobacco use, 1990-2019, by location.

| Location                                                | Percent Change in Number of Smoking Attributable Deaths, 1990-2019 | Percent Change in Share of Deaths Attributable to Smoking, 1990-2019 |
|---------------------------------------------------------|--------------------------------------------------------------------|----------------------------------------------------------------------|
| <b>Global</b>                                           | <b>31·1<br/>(21·2–42·1)</b>                                        | <b>8·17<br/>(2·40–15·0)</b>                                          |
| <b>Central Europe, Eastern Europe, and Central Asia</b> | <b>1·30<br/>(-7·26–9·91)</b>                                       | <b>-7·85<br/>(-11·9–-3·47)</b>                                       |
| Central Asia                                            | 32·0<br>(20·4–45·9)                                                | 8·65<br>(3·83–14·1)                                                  |
| Armenia                                                 | 14·6<br>(-2·75–34·1)                                               | -2·90<br>(-8·53–3·44)                                                |
| Azerbaijan                                              | 80·4<br>(47·7–123)                                                 | 39·0<br>(21·7–59·5)                                                  |
| Georgia                                                 | -24·3<br>(-37·3–10·4)                                              | -11·3<br>(-18·0–-2·93)                                               |
| Kazakhstan                                              | -1·29<br>(-15·4–15·4)                                              | -7·90<br>(-14·6–0·500)                                               |
| Kyrgyzstan                                              | 3·11<br>(-10·9–19·1)                                               | 3·05<br>(-3·90–11·0)                                                 |
| Mongolia                                                | 92·8<br>(47·0–155)                                                 | 60·1<br>(44·7–78·6)                                                  |
| Tajikistan                                              | 29·5<br>(2·96–61·7)                                                | 9·20<br>(-4·57–24·8)                                                 |
| Turkmenistan                                            | 29·0<br>(2·70–62·4)                                                | 5·27<br>(-4·06–14·7)                                                 |
| Uzbekistan                                              | 139<br>(99·7–187)                                                  | 53·6<br>(38·8–71·0)                                                  |
| Central Europe                                          | -13·3<br>(-23·9–-2·50)                                             | -17·6<br>(-20·7–-14·6)                                               |
| Albania                                                 | 60·8<br>(21·3–108)                                                 | 23·8<br>(13·8–35·6)                                                  |
| Bosnia and Herzegovina                                  | 40·2<br>(12·2–74·2)                                                | 7·89<br>(0·766–15·4)                                                 |
| Bulgaria                                                | -22·2<br>(-38·6–-2·81)                                             | -29·2<br>(-34·3–-23·2)                                               |
| Croatia                                                 | -25·9<br>(-41·0–-6·71)                                             | -25·9<br>(-30·9–-20·5)                                               |
| Czechia                                                 | -28·9<br>(-42·1–-13·7)                                             | -19·6<br>(-25·2–-13·4)                                               |
| Hungary                                                 | -20·7<br>(-34·4–-4·77)                                             | -11·9<br>(-16·8–-6·68)                                               |
| Montenegro                                              | 76·9<br>(48·1–111)                                                 | 12·0<br>(2·79–22·2)                                                  |
| North Macedonia                                         | 46·0<br>(16·1–83·6)                                                | 0·924<br>(-7·42–10·8)                                                |
| Poland                                                  | -17·2<br>(-30·9–-2·60)                                             | -21·6<br>(-26·8–-16·1)                                               |
| Romania                                                 | -13·7<br>(-29·5–-3·10)                                             | -19·4<br>(-24·9–-13·8)                                               |

|                           |                                     |                                     |
|---------------------------|-------------------------------------|-------------------------------------|
| Serbia                    | 23.0<br>(-1.84-50.0)                | 1.26<br>(-5.06-8.24)                |
| Slovakia                  | -24.6<br>(-40.0-5.72)               | -24.4<br>(-29.5-18.9)               |
| Slovenia                  | -4.32<br>(-33.1-32.7)               | -14.8<br>(-20.8-7.98)               |
| Eastern Europe            | 6.66<br>(-5.67-19.8)                | -3.05<br>(-9.48-4.07)               |
| Belarus                   | -0.445<br>(-20.7-24.2)              | -11.1<br>(-16.3-5.74)               |
| Estonia                   | -37.3<br>(-50.9-21.5)               | -24.7<br>(-30.7-14.6)               |
| Latvia                    | -38.6<br>(-49.3-26.0)               | -25.3<br>(-33.8-16.4)               |
| Lithuania                 | -24.8<br>(-38.1-8.63)               | -24.4<br>(-29.5-19.0)               |
| Republic of Moldova       | -3.77<br>(-17.8-12.9)               | 0.188<br>(-8.97-10.9)               |
| Russian Federation        | 12.4<br>(-4.18-30.3)                | 1.81<br>(-7.86-12.0)                |
| Ukraine                   | 0.968<br>(-16.4-19.8)               | -10.5<br>(-20.8-0.401)              |
| <b>High-income</b>        | <b>-5.94</b><br><b>(-8.45-3.20)</b> | <b>-27.3</b><br><b>(-29.2-25.3)</b> |
| Australasia               | -23.1<br>(-27.2-19.0)               | -46.1<br>(-48.8-43.3)               |
| Australia                 | -23.3<br>(-28.0-18.3)               | -47.2<br>(-50.2-44.0)               |
| New Zealand               | -22.7<br>(-27.0-18.0)               | -41.2<br>(-44.3-37.9)               |
| High-income Asia Pacific  | 15.8<br>(9.72-22.4)                 | -29.4<br>(-33.0-25.4)               |
| Brunei Darussalam         | 30.7<br>(10.9-54.7)                 | -23.8<br>(-31.1-15.7)               |
| Japan                     | 14.0<br>(7.26-21.7)                 | -33.9<br>(-37.8-29.8)               |
| Republic of Korea         | 23.9<br>(13.6-37.1)                 | -7.76<br>(-14.8-1.37)               |
| Singapore                 | 3.32<br>(-5.51-12.9)                | -37.4<br>(-42.7-31.9)               |
| High-income North America | 2.01<br>(-1.41-5.60)                | -26.7<br>(-29.2-24.2)               |
| Canada                    | -1.87<br>(-7.00-3.32)               | -35.2<br>(-38.5-32.0)               |
| Greenland                 | 21.2<br>(-1.94-45.2)                | 10.9<br>(3.49-20.0)                 |
| United States of America  | 2.39<br>(-1.30-6.28)                | -25.9<br>(-28.5-23.2)               |
| Southern Latin America    | 10.2<br>(4.72-16.1)                 | -20.6<br>(-24.2-16.8)               |
| Argentina                 | 10.5<br>(3.68-17.9)                 | -20.2<br>(-25.0-15.1)               |
| Chile                     | 19.2<br>(9.58-30.1)                 | -20.0<br>(-25.9-13.5)               |

|                                    |                                   |                                     |
|------------------------------------|-----------------------------------|-------------------------------------|
| Uruguay                            | -8.58<br>(-14.4–2.28)             | -20.0<br>(-24.7–15.0)               |
| Western Europe                     | -17.9<br>(-20.5–15.2)             | -27.0<br>(-29.1–24.7)               |
| Andorra                            | 77.6<br>(25.7–138)                | -29.3<br>(-35.6–22.7)               |
| Austria                            | -3.27<br>(-9.44–3.07)             | -4.14<br>(-10.0–2.12)               |
| Belgium                            | -18.1<br>(-22.6–13.1)             | -25.9<br>(-29.8–22.0)               |
| Cyprus                             | 54.6<br>(37.6–74.9)               | 1.52<br>(-5.50–9.00)                |
| Denmark                            | -27.1<br>(-31.0–23.0)             | -22.0<br>(-25.5–18.4)               |
| Finland                            | -23.9<br>(-30.1–17.6)             | -33.1<br>(-38.0–27.7)               |
| France                             | -6.21<br>(-12.2–0.145)            | -20.1<br>(-24.8–15.1)               |
| Germany                            | -22.1<br>(-27.5–16.1)             | -26.8<br>(-31.6–21.3)               |
| Greece                             | 25.0<br>(18.1–33.0)               | -11.1<br>(-15.5–5.95)               |
| Iceland                            | -11.2<br>(-20.8–0.889)            | -27.4<br>(-33.0–21.4)               |
| Ireland                            | -31.6<br>(-35.8–27.2)             | -34.9<br>(-38.2–31.6)               |
| Israel                             | 7.63<br>(-0.865–17.2)             | -34.6<br>(-39.2–29.3)               |
| Italy                              | -14.6<br>(-19.1–9.53)             | -29.3<br>(-33.0–25.2)               |
| Luxembourg                         | -14.3<br>(-25.0–1.12)             | -20.9<br>(-27.5–13.5)               |
| Malta                              | 0.690<br>(-10.2–13.3)             | -28.0<br>(-33.3–22.5)               |
| Monaco                             | 11.4<br>(-11.2–40.8)              | -7.09<br>(-15.5–2.50)               |
| Netherlands                        | -14.3<br>(-19.1–9.47)             | -30.7<br>(-34.1–27.1)               |
| Norway                             | -40.9<br>(-45.6–35.7)             | -35.5<br>(-40.5–30.1)               |
| Portugal                           | -13.6<br>(-19.8–6.58)             | -26.2<br>(-30.9–20.6)               |
| San Marino                         | 34.0<br>(-11.3–91.5)              | -28.7<br>(-36.1–21.1)               |
| Spain                              | 1.86<br>(-4.32–8.27)              | -22.3<br>(-26.7–17.9)               |
| Sweden                             | -18.1<br>(-23.7–11.9)             | -18.6<br>(-23.9–12.5)               |
| Switzerland                        | -13.8<br>(-19.2–6.99)             | -23.7<br>(-28.4–18.2)               |
| United Kingdom                     | -33.9<br>(-36.6–30.9)             | -32.3<br>(-34.8–29.3)               |
| <b>Latin America and Caribbean</b> | <b>25.6</b><br><b>(16.4–35.2)</b> | <b>-15.9</b><br><b>(-19.7–12.1)</b> |

|                                  |                       |                        |
|----------------------------------|-----------------------|------------------------|
| Andean Latin America             | 30.6<br>(6.95–56.5)   | 3.09<br>(-5.25–11.7)   |
| Bolivia (Plurinational State of) | 18.5<br>(-9.88–54.3)  | -4.52<br>(-16.9–8.35)  |
| Ecuador                          | 46.3<br>(15.6–88.1)   | -18.6<br>(-26.8–9.36)  |
| Peru                             | 26.3<br>(-8.50–76.8)  | 16.3<br>(-0.224–34.4)  |
| Caribbean                        | 50.3<br>(30.4–74.0)   | 6.22<br>(-1.25–14.1)   |
| Antigua and Barbuda              | 50.9<br>(25.2–80.6)   | 6.45<br>(-4.45–19.4)   |
| Bahamas                          | 68.0<br>(32.2–113)    | -12.2<br>(-22.7–0.835) |
| Barbados                         | 16.4<br>(-3.66–40.4)  | -14.9<br>(-23.2–5.38)  |
| Belize                           | 147<br>(106–193)      | 12.9<br>(1.42–25.6)    |
| Bermuda                          | 6.26<br>(-12.1–30.3)  | -10.1<br>(-19.4–1.05)  |
| Cuba                             | 38.2<br>(13.9–67.6)   | -8.01<br>(-14.5–1.53)  |
| Dominica                         | -10.2<br>(-26.3–10.3) | -15.7<br>(-24.2–6.70)  |
| Dominican Republic               | 211<br>(140–304)      | 71.4<br>(51.7–94.7)    |
| Grenada                          | 5.58<br>(-8.58–21.3)  | 6.27<br>(-4.92–18.7)   |
| Guyana                           | -4.14<br>(-28.5–28.8) | -6.90<br>(-16.0–3.80)  |
| Haiti                            | 13.6<br>(-13.8–54.2)  | -4.54<br>(-17.2–11.4)  |
| Jamaica                          | 55.7<br>(24.7–92.8)   | 1.50<br>(-6.32–10.6)   |
| Puerto Rico                      | 12.9<br>(-11.2–43.7)  | -12.5<br>(-21.8–2.13)  |
| Saint Kitts and Nevis            | 6.75<br>(-13.3–30.5)  | 3.85<br>(-10.8–19.5)   |
| Saint Lucia                      | 44.9<br>(21.5–72.4)   | -6.67<br>(-15.2–2.01)  |
| Saint Vincent and the Grenadines | 57.3<br>(32.0–86.4)   | 12.0<br>(-1.99–27.5)   |
| Suriname                         | 79.8<br>(47.7–118)    | 10.9<br>(0.552–23.1)   |
| Trinidad and Tobago              | 4.88<br>(-22.4–38.7)  | -26.1<br>(-32.3–19.2)  |
| United States Virgin Islands     | 115<br>(72.6–167)     | 8.85<br>(-6.08–25.4)   |
| Central Latin America            | 39.3<br>(20.1–60.6)   | -15.3<br>(-20.6–9.82)  |
| Colombia                         | 13.2<br>(-13.5–44.7)  | -22.2<br>(-29.7–14.3)  |
| Costa Rica                       | 59.5<br>(25.8–102)    | -25.6<br>(-31.3–19.9)  |

|                                     |                             |                             |
|-------------------------------------|-----------------------------|-----------------------------|
| El Salvador                         | 35.1<br>(2.27–75.5)         | 10.1<br>(-2.27–23.8)        |
| Guatemala                           | 55.9<br>(14.8–109)          | 19.7<br>(1.33–42.5)         |
| Honduras                            | 173<br>(123–232)            | 43.5<br>(23.6–68.4)         |
| Mexico                              | 34.5<br>(12.6–58.4)         | -19.8<br>(-28.0–10.9)       |
| Nicaragua                           | 104<br>(64.8–147)           | 29.4<br>(13.7–46.5)         |
| Panama                              | 32.2<br>(0.103–70.7)        | -33.5<br>(-40.2–25.9)       |
| Venezuela (Bolivarian Republic of)  | 64.3<br>(24.9–115)          | -22.0<br>(-29.2–14.6)       |
| Tropical Latin America              | 14.7<br>(8.01–22.0)         | -20.6<br>(-24.9–16.0)       |
| Brazil                              | 13.4<br>(6.82–20.8)         | -20.9<br>(-25.3–16.3)       |
| Paraguay                            | 102<br>(55.6–163)           | -0.939<br>(-11.0–10.3)      |
| <b>North Africa and Middle East</b> | <b>72.5<br/>(57.0–90.3)</b> | <b>41.3<br/>(33.2–48.8)</b> |
| North Africa and Middle East        | 72.5<br>(57.0–90.3)         | 41.3<br>(33.2–48.8)         |
| Afghanistan                         | 99.2<br>(47.9–164)          | 44.2<br>(16.1–76.4)         |
| Algeria                             | 56.4<br>(21.0–101)          | 19.5<br>(6.88–34.5)         |
| Bahrain                             | 75.5<br>(35.9–127)          | -19.3<br>(-28.4–7.95)       |
| Egypt                               | 124<br>(75.4–186)           | 85.6<br>(68.1–104)          |
| Iran (Islamic Republic of)          | 58.5<br>(44.1–76.0)         | 44.6<br>(30.5–61.4)         |
| Iraq                                | 106<br>(56.2–163)           | 36.5<br>(19.5–55.9)         |
| Jordan                              | 164<br>(104–236)            | 22.6<br>(5.78–41.5)         |
| Kuwait                              | 184<br>(130–249)            | 50.9<br>(36.0–69.1)         |
| Lebanon                             | 109<br>(72.2–148)           | 38.7<br>(24.3–53.4)         |
| Libya                               | 120<br>(68.6–192)           | 36.9<br>(24.3–52.5)         |
| Morocco                             | 58.1<br>(19.7–92.7)         | 23.1<br>(8.42–40.3)         |
| Oman                                | 5.27<br>(-19.6–41.1)        | -16.6<br>(-28.3–2.96)       |
| Palestine                           | 85.6<br>(44.2–146)          | 36.8<br>(18.8–58.9)         |
| Qatar                               | 280<br>(167–433)            | 13.3<br>(-2.56–33.6)        |
| Saudi Arabia                        | 187<br>(112–302)            | 84.9<br>(55.1–122)          |



|                                               |                                   |                                   |
|-----------------------------------------------|-----------------------------------|-----------------------------------|
| Sudan                                         | 36.9<br>(5.24–78.7)               | 72.0<br>(42.7–107)                |
| Syrian Arab Republic                          | 56.7<br>(12.7–122)                | 36.2<br>(20.4–56.2)               |
| Tunisia                                       | 98.0<br>(47.7–165)                | 26.0<br>(14.5–38.5)               |
| Turkey                                        | 33.3<br>(5.62–67.1)               | 14.5<br>(4.97–25.2)               |
| United Arab Emirates                          | 614<br>(398–911)                  | 41.3<br>(20.0–65.2)               |
| Yemen                                         | 102<br>(53.0–177)                 | 70.3<br>(39.7–111)                |
| <b>South Asia</b>                             | <b>52.8</b><br><b>(30.1–78.4)</b> | <b>38.5</b><br><b>(23.5–54.9)</b> |
| South Asia                                    | 52.8<br>(30.1–78.4)               | 38.5<br>(23.5–54.9)               |
| Bangladesh                                    | 21.2<br>(-4.19–51.8)              | 60.3<br>(44.3–80.3)               |
| Bhutan                                        | 59.2<br>(19.0–121)                | 112<br>(71.9–176)                 |
| India                                         | 58.9<br>(30.7–90.8)               | 39.9<br>(22.5–59.7)               |
| Nepal                                         | 71.8<br>(33.6–114)                | 97.4<br>(73.3–127)                |
| Pakistan                                      | 37.8<br>(7.88–75.9)               | 9.51<br>(-11.3–31.6)              |
| <b>Southeast Asia, East Asia, and Oceania</b> | <b>61.6</b><br><b>(36.7–95.9)</b> | <b>25.1</b><br><b>(13.1–41.4)</b> |
| East Asia                                     | 58.7<br>(27.8–101)                | 23.5<br>(9.42–41.4)               |
| China                                         | 57.9<br>(26.2–101)                | 23.7<br>(9.29–42.1)               |
| Democratic People's Republic of Korea         | 116<br>(72.6–165)                 | 53.9<br>(37.9–70.1)               |
| Taiwan (Province of China)                    | 62.9<br>(28.7–110)                | -9.12<br>(-15.4–2.28)             |
| Oceania                                       | 92.5<br>(56.9–136)                | -1.90<br>(-11.5–8.95)             |
| American Samoa                                | 63.8<br>(37.0–92.1)               | -4.31<br>(-13.2–5.09)             |
| Cook Islands                                  | 18.7<br>(-3.26–43.0)              | -4.52<br>(-14.5–6.07)             |
| Fiji                                          | 25.2<br>(-7.24–65.8)              | -22.7<br>(-28.8–16.0)             |
| Guam                                          | 92.9<br>(55.2–137)                | -3.88<br>(-14.2–7.69)             |
| Kiribati                                      | 62.5<br>(24.8–107)                | 31.6<br>(21.7–41.5)               |
| Marshall Islands                              | 71.8<br>(32.1–126)                | 19.6<br>(4.33–36.7)               |
| Micronesia (Federated States of)              | 26.2<br>(-14.3–70.5)              | 12.4<br>(-14.1–28.8)              |
| Nauru                                         | -1.88<br>(-20.7–22.3)             | 6.60<br>(-5.51–20.2)              |

|                                  |                                   |                                   |
|----------------------------------|-----------------------------------|-----------------------------------|
| Niue                             | -23.4<br>(-39.5–5.77)             | -1.23<br>(-13.2–12.3)             |
| Northern Mariana Islands         | 115<br>(77.7–156)                 | 13.3<br>(0.0417–26.8)             |
| Palau                            | 67.0<br>(23.8–121)                | 3.65<br>(-7.92–17.4)              |
| Papua New Guinea                 | 122<br>(68.4–191)                 | 3.34<br>(-11.0–20.3)              |
| Samoa                            | 26.7<br>(1.07–59.4)               | -3.00<br>(-12.3–6.89)             |
| Solomon Islands                  | 90.2<br>(43.7–147)                | 8.69<br>(-1.78–20.2)              |
| Tokelau                          | -32.4<br>(-46.5–13.8)             | -4.08<br>(-16.3–9.43)             |
| Tonga                            | 20.9<br>(-2.88–49.8)              | -6.31<br>(-14.9–3.79)             |
| Tuvalu                           | 6.29<br>(-18.3–42.0)              | 6.32<br>(-5.28–19.5)              |
| Vanuatu                          | 109<br>(62.8–175)                 | 3.30<br>(-7.67–18.2)              |
| Southeast Asia                   | 74.0<br>(54.5–95.9)               | 34.0<br>(25.1–43.9)               |
| Cambodia                         | 82.9<br>(46.1–120)                | 89.1<br>(67.8–111)                |
| Indonesia                        | 118<br>(74.0–171)                 | 75.7<br>(51.8–103)                |
| Lao People's Democratic Republic | 14.6<br>(-11.2–47.0)              | 52.1<br>(33.2–77.5)               |
| Malaysia                         | 108<br>(66.2–156)                 | -2.75<br>(-9.66–4.25)             |
| Maldives                         | 33.1<br>(9.95–57.6)               | 27.5<br>(13.7–41.7)               |
| Mauritius                        | 1.46<br>(-17.8–23.5)              | -35.0<br>(-39.6–30.0)             |
| Myanmar                          | -14.4<br>(-30.7–7.64)             | 5.31<br>(-6.74–18.6)              |
| Philippines                      | 131<br>(81.6–189)                 | 33.8<br>(17.2–52.7)               |
| Seychelles                       | 39.7<br>(20.5–63.5)               | -3.45<br>(-13.8–8.21)             |
| Sri Lanka                        | 5.92<br>(-21.0–38.7)              | -17.9<br>(-24.6–10.7)             |
| Thailand                         | 39.2<br>(3.39–85.1)               | -15.1<br>(-22.1–7.57)             |
| Timor-Leste                      | 185<br>(115–270)                  | 186<br>(133–252)                  |
| Viet Nam                         | 93.6<br>(54.1–141)                | 32.6<br>(21.1–46.9)               |
| <b>Sub-Saharan Africa</b>        | <b>34.1</b><br><b>(19.5–50.7)</b> | <b>19.8</b><br><b>(8.12–32.5)</b> |
| Central Sub-Saharan Africa       | 40.7<br>(12.4–75.9)               | 28.0<br>(11.4–48.1)               |
| Angola                           | 66.7<br>(24.4–133)                | 53.9<br>(25.6–98.2)               |

|                                  |                       |                       |
|----------------------------------|-----------------------|-----------------------|
| Central African Republic         | 29.8<br>(-0.546–69.2) | -9.58<br>(-22.2–6.56) |
| Congo                            | 40.5<br>(7.12–81.5)   | 19.6<br>(2.88–37.5)   |
| Democratic Republic of the Congo | 33.3<br>(1.06–74.3)   | 24.6<br>(3.23–49.6)   |
| Equatorial Guinea                | -11.5<br>(-38.6–33.7) | -15.9<br>(-37.7–15.1) |
| Gabon                            | 35.8<br>(3.22–71.8)   | 21.0<br>(3.42–42.8)   |
| Eastern Sub-Saharan Africa       | 28.2<br>(13.1–46.5)   | 40.3<br>(25.5–58.9)   |
| Burundi                          | -22.1<br>(-41.1–6.65) | -10.7<br>(-24.9–8.26) |
| Comoros                          | 27.7<br>(-5.98–115)   | 37.4<br>(8.41–126)    |
| Djibouti                         | 246<br>(152–385)      | 89.5<br>(52.2–134)    |
| Eritrea                          | 50.7<br>(7.22–139)    | 78.7<br>(39.7–170)    |
| Ethiopia                         | -40.9<br>(-55.4–19.0) | -4.22<br>(-26.2–30.5) |
| Kenya                            | 119<br>(75.7–172)     | 43.6<br>(19.7–73.5)   |
| Madagascar                       | -2.89<br>(-28.4–26.2) | -11.3<br>(-22.8–1.45) |
| Malawi                           | 50.5<br>(19.3–90.5)   | 106<br>(71.5–152)     |
| Mozambique                       | 66.2<br>(27.6–115)    | 32.4<br>(8.03–62.5)   |
| Rwanda                           | 11.7<br>(-10.7–43.2)  | 81.5<br>(50.4–123)    |
| Somalia                          | 80.2<br>(33.0–153)    | 14.4<br>(-7.21–44.0)  |
| South Sudan                      | 2.74<br>(-25.2–41.8)  | 11.1<br>(-16.5–47.7)  |
| Uganda                           | 62.4<br>(27.0–106)    | 94.8<br>(56.7–141)    |
| United Republic of Tanzania      | 55.0<br>(26.0–88.8)   | 47.8<br>(27.5–69.9)   |
| Zambia                           | 62.6<br>(25.8–108)    | 50.3<br>(22.0–81.2)   |
| Southern Sub-Saharan Africa      | 21.2<br>(10.1–32.9)   | -30.6<br>(-35.9–24.7) |
| Botswana                         | 72.0<br>(26.1–127)    | -15.8<br>(-27.9–1.73) |
| Eswatini                         | 30.9<br>(-3.60–78.1)  | -28.7<br>(-40.8–13.9) |
| Lesotho                          | 65.9<br>(27.0–112)    | -9.32<br>(-21.3–3.61) |
| Namibia                          | 14.3<br>(-9.16–46.7)  | -26.2<br>(-36.4–13.1) |
| South Africa                     | 10.2<br>(0.259–22.4)  | -37.9<br>(-43.6–31.9) |

|                            |                       |                          |
|----------------------------|-----------------------|--------------------------|
| Zimbabwe                   | 62.2<br>(27.2–100)    | 0.657<br>(-15.5–23.0)    |
| Western Sub-Saharan Africa | 52.6<br>(28.0–81.5)   | 23.0<br>(5.19–41.9)      |
| Benin                      | 27.8<br>(-3.01–66.9)  | -8.32<br>(-23.8–10.3)    |
| Burkina Faso               | 54.8<br>(21.6–99.3)   | 21.1<br>(-3.13–51.2)     |
| Cabo Verde                 | 35.2<br>(15.4–57.7)   | -3.10<br>(-13.3–9.12)    |
| Cameroon                   | 100<br>(51.4–166)     | 12.6<br>(-7.37–33.8)     |
| Chad                       | 64.2<br>(24.2–117)    | 3.58<br>(-18.5–32.1)     |
| Côte d'Ivoire              | 105<br>(54.7–167)     | 60.5<br>(29.6–97.1)      |
| Gambia                     | 90.9<br>(39.5–163)    | 37.6<br>(6.27–77.7)      |
| Ghana                      | 66.6<br>(27.2–116)    | 20.5<br>(0.343–45.9)     |
| Guinea                     | 88.6<br>(44.4–145)    | 79.5<br>(53.7–111)       |
| Guinea-Bissau              | -1.77<br>(-27.2–30.6) | 13.7<br>(-5.12–37.9)     |
| Liberia                    | 4.86<br>(-21.9–42.7)  | 35.7<br>(6.59–73.3)      |
| Mali                       | 125<br>(75.5–190)     | 80.1<br>(53.9–113)       |
| Mauritania                 | 7.62<br>(-22.1–43.2)  | 17.0<br>(-11.0–40.1)     |
| Niger                      | 163<br>(98.6–260)     | 111<br>(72.0–165)        |
| Nigeria                    | 20.2<br>(-14.7–71.8)  | 1.04<br>(-25.7–34.4)     |
| São Tomé and Príncipe      | 90.8<br>(51.7–148)    | 107<br>(73.9–160)        |
| Senegal                    | 36.3<br>(2.92–84.0)   | 30.8<br>(1.17–69.9)      |
| Sierra Leone               | 9.49<br>(-17.2–44.6)  | -0.00937<br>(-14.5–19.2) |
| Togo                       | 94.7<br>(48.8–154)    | 42.5<br>(16.7–74.0)      |
